# Supplementary material for: Genomic Sequence and Experimental Tractability of a New Decapod Shrimp Model, Neocaridina denticulata
Source: Mar Drugs. 2014 Mar 11;12(3):1419–37. doi: 10.3390/md12031419 (PMC3967219; doi:10.3390/md12031419)
Supplement: Supplementary File 1 — Supplementary Information (XLSX, 4729 KB) [file marinedrugs-12-01419-s001.xlsx]

## Sheet: mtDNA details
	Table S1. Mitochondrial genomic profile of Neocaridina denticulata (Crustacea: Caridea).
	Gene	Strand	Position		Nucleotides	Codons		Anti-codon	Intergenic
			Start	Stop		Start	Stop		sequence *
	cox1	H	1	1539	1539	AAC	TAA		2
	trnLeu(UUR)	H	1542	1605	64			TAA	1
	cox2	H	1607	2294	688	ATG	T-		0
	trnLys	H	2295	2362	68			TTT	16
	trnAsp	H	2379	2446	68			GTC	0
	atp8	H	2447	2605	159	ATT	TAA		−4
	atp6	H	2602	3273	672	ATA	TAA		−1
	cox3	H	3273	4058	786	ATG	TAG		3
	trnGly	H	4062	4126	65			TCC	0
	nad3	H	4127	4480	354	ATC	TAA		−2
	trnAla	H	4479	4543	65			TGC	−1
	trnArg	H	4543	4605	63			TCG	4
	trnAsn	H	4610	4676	67			GTT	0
	trnSer(AGN)	H	4677	4743	67			TCT	0
	trnGlu	H	4744	4811	68			TTC	−2
	trnPhe	L	4810	4875	66			GAA	0
	nad5	L	4876	6570	1695	ATA	TAA		33
	trnHis	L	6604	6669	66			GTG	0
	nad4	L	6670	8008	1339	ATG	T-		−7
	nad4L	L	8002	8277	276	ATT	TAA		29
	trnThr	H	8307	8372	66			TGT	0
	trnPro	L	8373	8438	66			TGG	2
	nad6	H	8441	8956	516	ATT	TAA		5
	cob	H	8962	10092	1131	ATG	TAA		−2
	trnSer(UCN)	H	10091	10160	70			TGA	18
	nad1	L	10179	11117	939	ATA	TAA		27
	trnLeu(CUN)	L	11145	11211	67			TAG	0
	lrRNA	L	11212	12543	1332				0
	trnVal	L	12544	12610	67			TAC	−1
	srRNA	L	12610	13464	855				0
	control region		13465	14152	688				0
	trnIle	H	14153	14217	65			GAT	8
	trnGln	L	14226	14293	68			TTG	5
	trnMet	H	14299	14364	66			CAT	0
	nad2	H	14365	15369	1005	ATT	TAA		−2
	trnTrp	H	15368	15437	70			TCA	−1
	trnCys	L	15437	15501	65			GCA	0
	trnTyr	L	15502	15565	64			GTA	0
	* Negative values mean overlapping nucleotides.
	Table S2. Initiation codon, termination codon and amino acids length of 13 protein-coding genes in all available mitochondrial genomes from Caridea.
	Species		cox1	cox2	cox3	cob	nad1	nad2	nad3	nad4	nad4L	nad5	nad6	atp6	atp8
	Neocaridina denticulata	NO.	512	229	261	376	312	334	117	446	91	564	171	223	52
		I codon	AAC	ATG	ATG	ATG	ATA	ATT	ATC	ATG	ATT	ATA	ATT	ATA	ATT
		T codon	TAA	T-	TAG	TAA	TAA	TAA	TAA	T-	TAA	TAA	TAA	TAA	TAA
	Halocaridina rubra	NO.	511	228	262	378	313	334	117	446	99	569	167	224	52
		I codon	CCG	ATG	ATG	ATG	ATT	ATT	ATT	ATG	ATG	ATA	ATA	ATA	ATC
		T codon	TAA	T-	TAA	TAA	TAA	TAA	T-	T-	TAA	TAA	TA-	TAA	TAA
	Alpheus japonicus	NO.	511	227	262	378	315	332	117	444	99	566	171	224	52
		I codon	TCG	ATG	ATG	ATG	GTG	ATT	ATA	ATG	ATG	ATG	ATA	ATG	ATA
		T codon	T-	TAA	TAA	TAA	TAA	TAA	T-	TAA	TAA	TAA	TAA	TAA	TAA
	Alpheus distinguendus	NO.	511	227	262	385	315	332	117	444	99	566	171	224	52
		I codon	TCG	ATG	ATG	ATG	GTG	ATT	ATT	GTG	ATG	ATA	ATA	ATG	ATA
		T codon	T-	TAG	TAA	TAG	TAA	T-	T-	TAA	TAA	TA-	TAA	TAA	TAA
	Alvinocaris chelys	NO.	512	230	262	378	302	331	117	447	99	570	171	224	52
		I codon	ATT	ATG	ATG	ATG	ATT	ATG	ATG	ATG	ATG	ATA	ATC	ATG	ATT
		T codon	T-	T-	TAA	TAG	TAG	TAA	TAA	T-	TAA	TA-	TAA	TAA	TAA
	Alvinocaris longirostris	NO.	519	229	262	378	313	331	117	446	99	572	171	224	52
		I codon	ACG	ATG	ATG	ATG	ATT	ATG	ATT	ATG	ATG	ATT	ATC	ATG	ATC
		T codon	T-	T-	TAA	TAG	TAG	TAA	TAA	T-	TAA	T-	TAA	TAA	TAA
	Nautilocaris saintlaurentae	NO.	511	230	262	378	313	331	117	446	99	572	171	224	52
		I codon	ACG	ATG	ATG	ATG	ATT	ATA	ATT	ATG	ATG	ATT	ATT	ATG	ATT
		T codon	T-	T-	TAG	T-	TAA	T-	TAA	T-	TAA	T-	TAA	TAA	TAA
	Opaepele loihi	NO.	511	230	262	378	313	331	117	446	99	572	171	224	52
		I codon	ACG	ATG	ATG	ATG	ATT	ATG	ATT	ATG	ATG	ATT	ATC	ATG	ATT
		T codon	T-	T-	TAA	TAG	TAG	TAA	TAA	T-	TAA	T-	TAA	TAA	TAA
	Rimicaris kairei	NO.	511	229	262	378	313	331	117	444	99	572	171	224	52
		I codon	ACG	ATG	ATG	ATG	ATT	ATG	ATT	ATG	ATG	ATT	ATC	GTG	ATT
		T codon	T-	T-	TAG	TAG	TAG	TAA	TAA	T-	TAA	T-	TAA	TAA	TAA
	Exopalaemon carinicauda	NO.	511	229	262	378	312	329	117	444	99	568	171	224	52
		I codon	ACG	ATG	ATG	ATG	ATA	ATT	ATT	ATG	ATG	ATA	ATA	ATG	ATT
		T codon	TA-	T-	TAA	T-	TAG	TAG	TAA	TAA	TAA	TAA	TAA	TAA	TAA
	Macrobrachium lanchesteri	NO.	511	229	262	378	312	331	117	444	99	568	171	224	52
		I codon	ACG	ATG	ATG	ATG	ATA	ATT	ATG	ATG	ATG	ATA	ATT	ATG	ATC
		T codon	TA-	T-	TAA	T-	TAG	T-	TAA	TAA	TAA	TA-	TAA	TAA	TAA
	Macrobrachium nipponense	NO.	511	228	262	378	313	331	117	444	99	568	171	224	52
		I codon	ACG	ATG	ATG	ATG	ATG	ATA	ATG	ATG	ATG	ATG	ATC	ATG	ATG
		T codon	TA-	T-	TAA	T-	TAG	TAA	TAA	TAG	TAA	TAA	TAA	TAA	TAA
	Macrobrachium rosenbergii	NO.	511	229	264	377	312	331	117	444	99	568	171	224	52
		I codon	ACG	AAT	ACT	ATG	ATA	ATT	ATG	ATG	ATG	ATG	ATC	ATG	ATC
		T codon	TA-	T-	TAA	T-	TAG	T-	TAA	TAA	TAA	TAA	TA-	T-	TAA
	Table S3. Nucleotide composition and skews in the mitochondrial protein-coding and ribosomal RNA genes of Neocaridina denticulata (Crustacea: Caridea).
	Gene	Length	Proportion of nucleotides				A + T	AT skew	GC skew
		(bp)	A	C	G	T	(%)
	atp6	672	0.271	0.208	0.155	0.366	63.7	−0.15	−0.148
	atp8	159	0.346	0.17	0.082	0.403	74.8	−0.076	−0.35
	cob	1131	0.264	0.2	0.162	0.374	63.8	−0.172	−0.105
	cox1	1539	0.273	0.204	0.186	0.337	60.9	−0.104	−0.045
	cox2	688	0.307	0.195	0.166	0.333	64	−0.041	−0.081
	cox3	786	0.27	0.21	0.164	0.356	62.6	−0.138	−0.122
	nad1	939	0.239	0.126	0.199	0.437	67.5	−0.293	0.226
	nad2	1005	0.266	0.236	0.118	0.38	64.6	−0.177	−0.331
	nad3	354	0.274	0.184	0.141	0.401	67.5	−0.188	−0.13
	nad4	1339	0.233	0.117	0.226	0.425	65.8	−0.292	0.319
	nad4L	276	0.254	0.098	0.21	0.438	69.2	−0.267	0.365
	nad5	1695	0.256	0.135	0.212	0.397	65.3	−0.216	0.224
	nad6	516	0.279	0.2	0.112	0.409	68.8	−0.189	−0.28
	srRNA	855	0.316	0.106	0.205	0.373	68.9	−0.083	0.316
	lrRNA	1332	0.342	0.099	0.173	0.385	72.7	−0.059	0.273
	The bias of the base composition of genes is described as skewness and calculated as (A% − T%)/(A% + T%) and (G% − C%)/(C% + G%).
	Table S4. Codon usage of Neocaridina denticulata (Crustacea: Caridea) 13 mitochondrial PCGs.
	Codon	Number	Proportion	Codon	Number	Proportion	Codon	Number	Proportion	Codon	Number	Proportion
	UUU-F	245	6.62	UCU-S	116	3.14	UAU-Y	90	2.43	UGU-C	34	0.92
	UUC-F	55	1.49	UCC-S	30	0.81	UAC-Y	40	1.08	UGC-C	9	0.24
	UUA-L	281	7.6	UCA-S	57	1.54	UAA-*	10	0.27	UGA-W	70	1.89
	UUG-L	65	1.76	UCG-S	20	0.54	UAG-*	1	0.03	UGG-W	28	0.76
	CUU-L	100	2.7	CCU-P	61	1.65	CAU-H	43	1.16	CGU-R	15	0.41
	CUC-L	32	0.87	CCC-P	21	0.57	CAC-H	37	1	CGC-R	5	0.14
	CUA-L	74	2	CCA-P	45	1.22	CAA-Q	62	1.68	CGA-R	29	0.78
	CUG-L	23	0.62	CCG-P	22	0.59	CAG-Q	20	0.54	CGG-R	14	0.38
	AUU-I	242	6.54	ACU-T	98	2.65	AAU-N	78	2.11	AGU-S	33	0.89
	AUC-I	68	1.84	ACC-T	31	0.84	AAC-N	40	1.08	AGC-S	5	0.14
	AUA-M	132	3.57	ACA-T	68	1.84	AAA-K	67	1.81	AGA-S	71	1.92
	AUG-M	50	1.35	ACG-T	14	0.38	AAG-K	12	0.32	AGG-S	22	0.59
	GUU-V	104	2.81	GCU-A	123	3.33	GAU-D	51	1.38	GGU-G	55	1.49
	GUC-V	24	0.65	GCC-A	57	1.54	GAC-D	27	0.73	GGC-G	22	0.59
	GUA-V	92	2.49	GCA-A	51	1.38	GAA-E	53	1.43	GGA-G	81	2.19
	GUG-V	40	1.08	GCG-A	20	0.54	GAG-E	22	0.59	GGG-G	92	2.49
	Table S5. Species names, accession numbers, total lengths, AT contents and taxonomic positions of 67 mitochondrial genomes used in phylogenetic analyses.
	Species	Accession	Length	A + T content	Taxonomic position
			(bp)	(%)
	Neocaridina denticulata	XXXXXXXX	15565	66.82	Malacostraca, Eucarida, Decapoda, Pleocyemata, Caridea, Atyoidea, Atyidae
	Halocaridina rubra	NC_008413	16065	63.19	Malacostraca, Eucarida, Decapoda, Pleocyemata, Caridea, Atyoidea, Atyidae
	Alpheus japonicus	EU594640	16487	64.94	Malacostraca, Eucarida, Decapoda, Pleocyemata, Caridea, Alpheoidea, Alpheidae
	Alpheus distinguendus	NC_014883	15700	60.17	Malacostraca, Eucarida, Decapoda, Pleocyemata, Caridea, Alpheoidea, Alpheidae
	Alvinocaris chelys	NC_018778	15910	63.36	Malacostraca, Eucarida, Decapoda, Pleocyemata, Caridea, Bresilioidea, Alvinocarididae
	Alvinocaris longirostris	NC_020313	16050	62.17	Malacostraca, Eucarida, Decapoda, Pleocyemata, Caridea, Bresilioidea, Alvinocarididae
	Nautilocaris saintlaurentae	NC_021971	15928	66.89	Malacostraca, Eucarida, Decapoda, Pleocyemata, Caridea, Bresilioidea, Alvinocarididae
	Opaepele loihi	NC_020311	15905	65.65	Malacostraca, Eucarida, Decapoda, Pleocyemata, Caridea, Bresilioidea, Alvinocarididae
	Rimicaris kairei	NC_020310	15900	65.81	Malacostraca, Eucarida, Decapoda, Pleocyemata, Caridea, Bresilioidea, Alvinocarididae
	Exopalaemon carinicauda	NC_012566	15730	63.59	Malacostraca, Eucarida, Decapoda, Pleocyemata, Caridea, Palaemonoidea, Palaemonidae
	Macrobrachium lanchesteri	NC_012217	15694	67.09	Malacostraca, Eucarida, Decapoda, Pleocyemata, Caridea, Palaemonoidea, Palaemonidae
	Macrobrachium nipponense	NC_015073	15806	66.04	Malacostraca, Eucarida, Decapoda, Pleocyemata, Caridea, Palaemonoidea, Palaemonidae
	Macrobrachium rosenbergii	NC_006880	15772	62.27	Malacostraca, Eucarida, Decapoda, Pleocyemata, Caridea, Palaemonoidea, Palaemonidae
	Panulirus homarus	NC_016015	15665	67.11	Malacostraca, Eucarida, Decapoda, Pleocyemata, Achelata, Palinuroidea, Palinuridae
	Panulirus japonicus	NC_004251	15717	64.54	Malacostraca, Eucarida, Decapoda, Pleocyemata, Achelata, Palinuroidea, Palinuridae
	Panulirus ornatus	NC_014854	16105	66.71	Malacostraca, Eucarida, Decapoda, Pleocyemata, Achelata, Palinuroidea, Palinuridae
	Panulirus stimpsoni	NC_014339	15677	65.64	Malacostraca, Eucarida, Decapoda, Pleocyemata, Achelata, Palinuroidea, Palinuridae
	Panulirus versicolor	NC_017868	15700	66.72	Malacostraca, Eucarida, Decapoda, Pleocyemata, Achelata, Palinuroidea, Palinuridae
	Scyllarides latus	NC_020022	15663	67.55	Malacostraca, Eucarida, Decapoda, Pleocyemata, Achelata, Palinuroidea, Scyllaridae
	Shinkaia crosnieri	NC_011013	15182	72.88	Malacostraca, Eucarida, Decapoda, Pleocyemata, Anomura, Galatheoidea, Galatheidae
	Neopetrolisthes maculatus	NC_020024	15324	71.25	Malacostraca, Eucarida, Decapoda, Pleocyemata, Anomura, Galatheoidea, Porcellanidae
	Paralithodes camtschaticus	NC_020029	16720	73.86	Malacostraca, Eucarida, Decapoda, Pleocyemata, Anomura, Paguroidea, Lithodidae
	Cambaroides similis	NC_016925	16220	71.68	Malacostraca, Eucarida, Decapoda, Pleocyemata, Astacidea, Astacoidea, Cambaridae
	Procambarus clarkii	NC_016926	15928	72.88	Malacostraca, Eucarida, Decapoda, Pleocyemata, Astacidea, Astacoidea, Cambaridae
	Procambarus fallax	NC_020021	15253	72.43	Malacostraca, Eucarida, Decapoda, Pleocyemata, Astacidea, Astacoidea, Cambaridae
	Homarus americanus	NC_015607	16432	69.53	Malacostraca, Eucarida, Decapoda, Pleocyemata, Astacidea, Nephropoidea, Nephropidae
	Homarus gammarus	NC_020020	14316	68.59	Malacostraca, Eucarida, Decapoda, Pleocyemata, Astacidea, Nephropoidea, Nephropidae
	Cherax destructor	NC_011243	15894	62.43	Malacostraca, Eucarida, Decapoda, Pleocyemata, Astacidea, Parastacoidea, Parastacidae
	Austinograea alayseae	NC_020314	15620	66.79	Malacostraca, Eucarida, Decapoda, Pleocyemata, Brachyura, EuBrachyura, Bythograeoidea, Bythograeidae
	Austinograea rodriguezensis	NC_020312	15611	68.8	Malacostraca, Eucarida, Decapoda, Pleocyemata, Brachyura, EuBrachyura, Bythograeoidea, Bythograeidae
	Gandalfus yunohana	NC_013713	15567	69.94	Malacostraca, Eucarida, Decapoda, Pleocyemata, Brachyura, EuBrachyura, Bythograeoidea, Bythograeidae
	Eriocheir hepuensis	NC_011598	16335	71.51	Malacostraca, Eucarida, Decapoda, Pleocyemata, Brachyura, EuBrachyura, Grapsoidea, Varunidae
	Eriocheir japonica	NC_011597	16352	71.62	Malacostraca, Eucarida, Decapoda, Pleocyemata, Brachyura, EuBrachyura, Grapsoidea, Varunidae
	Eriocheir sinensis	NC_006992	16354	71.63	Malacostraca, Eucarida, Decapoda, Pleocyemata, Brachyura, EuBrachyura, Grapsoidea, Varunidae
	Xenograpsus testudinatus	NC_013480	15798	73.91	Malacostraca, Eucarida, Decapoda, Pleocyemata, Brachyura, EuBrachyura, Grapsoidea, Xenograpsidae
	Ilyoplax deschampsi	NC_020040	15460	69.62	Malacostraca, Eucarida, Decapoda, Pleocyemata, Brachyura, EuBrachyura, Ocypodoidea, Dotillidae
	Callinectes sapidus	NC_006281	16263	69.1	Malacostraca, Eucarida, Decapoda, Pleocyemata, Brachyura, EuBrachyura, Portunoidea, Portunidae
	Charybdis japonica	NC_013246	15738	69.24	Malacostraca, Eucarida, Decapoda, Pleocyemata, Brachyura, EuBrachyura, Portunoidea, Portunidae
	Portunus trituberculatus	NC_005037	16026	70.22	Malacostraca, Eucarida, Decapoda, Pleocyemata, Brachyura, EuBrachyura, Portunoidea, Portunidae
	Scylla olivacea	NC_012569	15723	69.36	Malacostraca, Eucarida, Decapoda, Pleocyemata, Brachyura, EuBrachyura, Portunoidea, Portunidae
	Scylla paramamosain	NC_012572	15825	72.98	Malacostraca, Eucarida, Decapoda, Pleocyemata, Brachyura, EuBrachyura, Portunoidea, Portunidae
	Scylla serrata	NC_012565	15775	72.51	Malacostraca, Eucarida, Decapoda, Pleocyemata, Brachyura, EuBrachyura, Portunoidea, Portunidae
	Scylla tranquebarica	NC_012567	15833	73.76	Malacostraca, Eucarida, Decapoda, Pleocyemata, Brachyura, EuBrachyura, Portunoidea, Portunidae
	Geothelphusa dehaani	NC_007379	18197	74.92	Malacostraca, Eucarida, Decapoda, Pleocyemata, Brachyura, EuBrachyura, Potamoidea, Potamidae
	Pseudocarcinus gigas	NC_006891	15515	70.47	Malacostraca, Eucarida, Decapoda, Pleocyemata, Brachyura, EuBrachyura, Xanthoidea, Eriphiidae
	Polycheles typhlops	NC_020026	16221	67.51	Malacostraca, Eucarida, Decapoda, Pleocyemata, Polychelida, Eryonoidea, Polychelidae
	Stenopus hispidus	NC_018097	15528	70.58	Malacostraca, Eucarida, Decapoda, Pleocyemata, Stenopodidea, Stenopodidae
	Neaxius glyptocercus	NC_019609	14909	67.42	Malacostraca, Eucarida, Decapoda, Pleocyemata, Thalassinidea, Axioidea, Strahlaxiidae
	Corallianassa coutierei	NC_020025	15481	64.74	Malacostraca, Eucarida, Decapoda, Pleocyemata, Thalassinidea, Callianassoidea, Callianassidae
	Nihonotrypaea japonica	NC_020351	15274	70.29	Malacostraca, Eucarida, Decapoda, Pleocyemata, Thalassinidea, Callianassoidea, Callianassidae
	Nihonotrypaea thermophila	NC_019610	15240	69.61	Malacostraca, Eucarida, Decapoda, Pleocyemata, Thalassinidea, Callianassoidea, Callianassidae
	Austinogebia edulis	NC_019606	15761	73.63	Malacostraca, Eucarida, Decapoda, Pleocyemata, Thalassinidea, Callianassoidea, Upogebiidae
	Upogebia major	NC_019607	16143	70.69	Malacostraca, Eucarida, Decapoda, Pleocyemata, Thalassinidea, Callianassoidea, Upogebiidae
	Upogebia pusilla	NC_020023	15680	70.85	Malacostraca, Eucarida, Decapoda, Pleocyemata, Thalassinidea, Callianassoidea, Upogebiidae
	Thalassina kelanang	NC_019608	15528	66.31	Malacostraca, Eucarida, Decapoda, Pleocyemata, Thalassinidea, Thalassinoidea, Thalassinidae
	Farfantepenaeus californiensis	NC_012738	15975	67.04	Malacostraca, Eucarida, Decapoda, Dendrobranchiata, Penaeoidea, Penaeidae
	Fenneropenaeus chinensis	NC_009679	16004	68.85	Malacostraca, Eucarida, Decapoda, Dendrobranchiata, Penaeoidea, Penaeidae
	Litopenaeus stylirostris	NC_012060	15988	68.59	Malacostraca, Eucarida, Decapoda, Dendrobranchiata, Penaeoidea, Penaeidae
	Litopenaeus vannamei	NC_009626	15990	67.7	Malacostraca, Eucarida, Decapoda, Dendrobranchiata, Penaeoidea, Penaeidae
	Marsupenaeus japonicus	NC_007010	15968	66.46	Malacostraca, Eucarida, Decapoda, Dendrobranchiata, Penaeoidea, Penaeidae
	Penaeus monodon	NC_002184	15984	70.61	Malacostraca, Eucarida, Decapoda, Dendrobranchiata, Penaeoidea, Penaeidae
	Acetes chinensis	NC_017600	15740	70.63	Malacostraca, Eucarida, Decapoda, Dendrobranchiata, Sergestoidea, Sergestidae
	Gonodactylus chiragra	NC_007442	16279	67.5	Malacostraca, Hoplocarida, Stomatopoda, Gonodactylidae
	Lysiosquillina maculata	NC_007443	16325	63.85	Malacostraca, Hoplocarida, Stomatopoda, Lysiosquillidae
	Harpiosquilla harpax	NC_006916	15714	69.74	Malacostraca, Hoplocarida, Stomatopoda, Squillidae
	Oratosquilla oratoria	NC_014342	15783	70.79	Malacostraca, Hoplocarida, Stomatopoda, Squillidae
	Squilla mantis	NC_006081	15994	70.17	Malacostraca, Hoplocarida, Stomatopoda, Squillidae

## Sheet: Details of hits
Daphnia Sequences with no hit to the nr database (e-6)	Daphnia Sequences with no hit to the shrimp genome (e-3)	Daphnia Sequences with no hit to the shrimp genome (e-6)	No hit in nr, but hit to shrimp (e-6)	Hit in nr, but no hit in shrimp (e-6)
>jgi|Dappu1|100009|fgenesh1_pg.C_scaffold_13000262	>jgi|Dappu1|231944|SNAP_00000002	jgi|Dappu1|231944|SNAP_00000002	>jgi|Dappu1|100066|fgenesh1_pg.C_scaffold_13000319	>jgi|Dappu1|309476|NCBI_GNO_0100005
>jgi|Dappu1|100045|fgenesh1_pg.C_scaffold_13000298	>jgi|Dappu1|93892|fgenesh1_pg.C_scaffold_1000003	jgi|Dappu1|93892|fgenesh1_pg.C_scaffold_1000003	>jgi|Dappu1|100070|fgenesh1_pg.C_scaffold_13000323	>jgi|Dappu1|219972|estExt_fgenesh1_pg.C_10103
>jgi|Dappu1|100062|fgenesh1_pg.C_scaffold_13000315	>jgi|Dappu1|219910|estExt_fgenesh1_pg.C_10005	jgi|Dappu1|219910|estExt_fgenesh1_pg.C_10005	>jgi|Dappu1|100071|fgenesh1_pg.C_scaffold_13000324	>jgi|Dappu1|219990|estExt_fgenesh1_pg.C_10137
>jgi|Dappu1|100066|fgenesh1_pg.C_scaffold_13000319	>jgi|Dappu1|93895|fgenesh1_pg.C_scaffold_1000006	jgi|Dappu1|93895|fgenesh1_pg.C_scaffold_1000006	>jgi|Dappu1|100075|fgenesh1_pg.C_scaffold_13000328	>jgi|Dappu1|219999|estExt_fgenesh1_pg.C_10153
>jgi|Dappu1|100070|fgenesh1_pg.C_scaffold_13000323	>jgi|Dappu1|309476|NCBI_GNO_0100005	jgi|Dappu1|309476|NCBI_GNO_0100005	>jgi|Dappu1|100125|fgenesh1_pg.C_scaffold_14000022	>jgi|Dappu1|232153|SNAP_00000211
>jgi|Dappu1|100071|fgenesh1_pg.C_scaffold_13000324	>jgi|Dappu1|309480|NCBI_GNO_0100009	jgi|Dappu1|309480|NCBI_GNO_0100009	>jgi|Dappu1|100126|fgenesh1_pg.C_scaffold_14000023	>jgi|Dappu1|40007|e_gw1.1.979.1
>jgi|Dappu1|100075|fgenesh1_pg.C_scaffold_13000328	>jgi|Dappu1|231978|SNAP_00000036	jgi|Dappu1|39440|e_gw1.1.1006.1	>jgi|Dappu1|100140|fgenesh1_pg.C_scaffold_14000037	>jgi|Dappu1|232187|SNAP_00000245
>jgi|Dappu1|100090|fgenesh1_pg.C_scaffold_13000343	>jgi|Dappu1|309491|NCBI_GNO_0100020	jgi|Dappu1|231978|SNAP_00000036	>jgi|Dappu1|100184|fgenesh1_pg.C_scaffold_14000081	>jgi|Dappu1|299833|PASA_GEN_0100060
>jgi|Dappu1|100101|fgenesh1_pg.C_scaffold_13000354	>jgi|Dappu1|299786|PASA_GEN_0100006	jgi|Dappu1|309491|NCBI_GNO_0100020	>jgi|Dappu1|100188|fgenesh1_pg.C_scaffold_14000085	>jgi|Dappu1|309638|NCBI_GNO_0100167
>jgi|Dappu1|100102|fgenesh1_pg.C_scaffold_13000355	>jgi|Dappu1|299787|PASA_GEN_0100007	jgi|Dappu1|299786|PASA_GEN_0100006	>jgi|Dappu1|100208|fgenesh1_pg.C_scaffold_14000105	>jgi|Dappu1|300045|PASA_GEN_0100326
>jgi|Dappu1|100103|fgenesh1_pg.C_scaffold_13000356	>jgi|Dappu1|309494|NCBI_GNO_0100023	jgi|Dappu1|299787|PASA_GEN_0100007	>jgi|Dappu1|100218|fgenesh1_pg.C_scaffold_14000115	>jgi|Dappu1|35705|gw1.1.967.1
>jgi|Dappu1|100105|fgenesh1_pg.C_scaffold_14000002	>jgi|Dappu1|231986|SNAP_00000044	jgi|Dappu1|309494|NCBI_GNO_0100023	>jgi|Dappu1|100276|fgenesh1_pg.C_scaffold_14000173	>jgi|Dappu1|33380|gw1.1.915.1
>jgi|Dappu1|100117|fgenesh1_pg.C_scaffold_14000014	>jgi|Dappu1|299990|PASA_GEN_0100251	jgi|Dappu1|231986|SNAP_00000044	>jgi|Dappu1|100284|fgenesh1_pg.C_scaffold_14000181	>jgi|Dappu1|309707|NCBI_GNO_0100236
>jgi|Dappu1|100118|fgenesh1_pg.C_scaffold_14000015	>jgi|Dappu1|231988|SNAP_00000046	jgi|Dappu1|299990|PASA_GEN_0100251	>jgi|Dappu1|100315|fgenesh1_pg.C_scaffold_14000212	>jgi|Dappu1|190026|estExt_Genewise1Plus.C_10373
>jgi|Dappu1|100124|fgenesh1_pg.C_scaffold_14000021	>jgi|Dappu1|231992|SNAP_00000050	jgi|Dappu1|231988|SNAP_00000046	>jgi|Dappu1|100321|fgenesh1_pg.C_scaffold_14000218	>jgi|Dappu1|94160|fgenesh1_pg.C_scaffold_1000271
>jgi|Dappu1|100125|fgenesh1_pg.C_scaffold_14000022	>jgi|Dappu1|309502|NCBI_GNO_0100031	jgi|Dappu1|231989|SNAP_00000047	>jgi|Dappu1|100339|fgenesh1_pg.C_scaffold_14000236	>jgi|Dappu1|299863|PASA_GEN_0100095
>jgi|Dappu1|100126|fgenesh1_pg.C_scaffold_14000023	>jgi|Dappu1|231997|SNAP_00000055	jgi|Dappu1|231992|SNAP_00000050	>jgi|Dappu1|100340|fgenesh1_pg.C_scaffold_14000237	>jgi|Dappu1|299864|PASA_GEN_0100096
>jgi|Dappu1|100127|fgenesh1_pg.C_scaffold_14000024	>jgi|Dappu1|309506|NCBI_GNO_0100035	jgi|Dappu1|309502|NCBI_GNO_0100031	>jgi|Dappu1|100403|fgenesh1_pg.C_scaffold_14000300	>jgi|Dappu1|299870|PASA_GEN_0100104
>jgi|Dappu1|100137|fgenesh1_pg.C_scaffold_14000034	>jgi|Dappu1|299994|PASA_GEN_0100255	jgi|Dappu1|231997|SNAP_00000055	>jgi|Dappu1|100405|fgenesh1_pg.C_scaffold_14000302	>jgi|Dappu1|300105|PASA_GEN_0100408
>jgi|Dappu1|100138|fgenesh1_pg.C_scaffold_14000035	>jgi|Dappu1|219945|estExt_fgenesh1_pg.C_10060	jgi|Dappu1|309506|NCBI_GNO_0100035	>jgi|Dappu1|100422|fgenesh1_pg.C_scaffold_14000319	>jgi|Dappu1|300108|PASA_GEN_0100411
>jgi|Dappu1|100140|fgenesh1_pg.C_scaffold_14000037	>jgi|Dappu1|309527|NCBI_GNO_0100056	jgi|Dappu1|299994|PASA_GEN_0100255	>jgi|Dappu1|100424|fgenesh1_pg.C_scaffold_14000321	>jgi|Dappu1|230092|estExt_fgenesh1_kg.C_10029
>jgi|Dappu1|100142|fgenesh1_pg.C_scaffold_14000039	>jgi|Dappu1|232031|SNAP_00000089	jgi|Dappu1|299999|PASA_GEN_0100261	>jgi|Dappu1|100474|fgenesh1_pg.C_scaffold_15000039	>jgi|Dappu1|300109|PASA_GEN_0100413
>jgi|Dappu1|100144|fgenesh1_pg.C_scaffold_14000041	>jgi|Dappu1|93965|fgenesh1_pg.C_scaffold_1000076	jgi|Dappu1|219945|estExt_fgenesh1_pg.C_10060	>jgi|Dappu1|100787|fgenesh1_pg.C_scaffold_16000032	>jgi|Dappu1|309818|NCBI_GNO_0100349
>jgi|Dappu1|100157|fgenesh1_pg.C_scaffold_14000054	>jgi|Dappu1|232033|SNAP_00000091	jgi|Dappu1|309527|NCBI_GNO_0100056	>jgi|Dappu1|100849|fgenesh1_pg.C_scaffold_16000094	>jgi|Dappu1|300112|PASA_GEN_0100416
>jgi|Dappu1|100168|fgenesh1_pg.C_scaffold_14000065	>jgi|Dappu1|232034|SNAP_00000092	jgi|Dappu1|232031|SNAP_00000089	>jgi|Dappu1|100870|fgenesh1_pg.C_scaffold_16000115	>jgi|Dappu1|309824|NCBI_GNO_0100355
>jgi|Dappu1|100169|fgenesh1_pg.C_scaffold_14000066	>jgi|Dappu1|93967|fgenesh1_pg.C_scaffold_1000078	jgi|Dappu1|93965|fgenesh1_pg.C_scaffold_1000076	>jgi|Dappu1|100968|fgenesh1_pg.C_scaffold_16000213	>jgi|Dappu1|309848|NCBI_GNO_0100380
>jgi|Dappu1|100180|fgenesh1_pg.C_scaffold_14000077	>jgi|Dappu1|93969|fgenesh1_pg.C_scaffold_1000080	jgi|Dappu1|232033|SNAP_00000091	>jgi|Dappu1|100983|fgenesh1_pg.C_scaffold_16000228	>jgi|Dappu1|300120|PASA_GEN_0100428
>jgi|Dappu1|100181|fgenesh1_pg.C_scaffold_14000078	>jgi|Dappu1|93970|fgenesh1_pg.C_scaffold_1000081	jgi|Dappu1|232034|SNAP_00000092	>jgi|Dappu1|100990|fgenesh1_pg.C_scaffold_16000235	>jgi|Dappu1|220171|estExt_fgenesh1_pg.C_10430
>jgi|Dappu1|100182|fgenesh1_pg.C_scaffold_14000079	>jgi|Dappu1|232048|SNAP_00000106	jgi|Dappu1|93967|fgenesh1_pg.C_scaffold_1000078	>jgi|Dappu1|101008|fgenesh1_pg.C_scaffold_16000253	>jgi|Dappu1|309890|NCBI_GNO_0100422
>jgi|Dappu1|100184|fgenesh1_pg.C_scaffold_14000081	>jgi|Dappu1|219972|estExt_fgenesh1_pg.C_10103	jgi|Dappu1|93969|fgenesh1_pg.C_scaffold_1000080	>jgi|Dappu1|101011|fgenesh1_pg.C_scaffold_16000256	>jgi|Dappu1|309918|NCBI_GNO_0100450
>jgi|Dappu1|100186|fgenesh1_pg.C_scaffold_14000083	>jgi|Dappu1|309557|NCBI_GNO_0100086	jgi|Dappu1|93970|fgenesh1_pg.C_scaffold_1000081	>jgi|Dappu1|101027|fgenesh1_pg.C_scaffold_16000272	>jgi|Dappu1|299931|PASA_GEN_0100179
>jgi|Dappu1|100188|fgenesh1_pg.C_scaffold_14000085	>jgi|Dappu1|232066|SNAP_00000124	jgi|Dappu1|232048|SNAP_00000106	>jgi|Dappu1|101032|fgenesh1_pg.C_scaffold_16000277	>jgi|Dappu1|309949|NCBI_GNO_0100482
>jgi|Dappu1|100189|fgenesh1_pg.C_scaffold_14000086	>jgi|Dappu1|232073|SNAP_00000131	jgi|Dappu1|219972|estExt_fgenesh1_pg.C_10103	>jgi|Dappu1|101076|fgenesh1_pg.C_scaffold_17000027	>jgi|Dappu1|309950|NCBI_GNO_0100483
>jgi|Dappu1|100194|fgenesh1_pg.C_scaffold_14000091	>jgi|Dappu1|232090|SNAP_00000148	jgi|Dappu1|93993|fgenesh1_pg.C_scaffold_1000104	>jgi|Dappu1|101165|fgenesh1_pg.C_scaffold_17000116	>jgi|Dappu1|309965|NCBI_GNO_0100498
>jgi|Dappu1|100198|fgenesh1_pg.C_scaffold_14000095	>jgi|Dappu1|232091|SNAP_00000149	jgi|Dappu1|309557|NCBI_GNO_0100086	>jgi|Dappu1|101184|fgenesh1_pg.C_scaffold_17000135	>jgi|Dappu1|190285|estExt_Genewise1Plus.C_10759
>jgi|Dappu1|100200|fgenesh1_pg.C_scaffold_14000097	>jgi|Dappu1|309576|NCBI_GNO_0100105	jgi|Dappu1|232066|SNAP_00000124	>jgi|Dappu1|101187|fgenesh1_pg.C_scaffold_17000138	>jgi|Dappu1|310000|NCBI_GNO_0100533
>jgi|Dappu1|100201|fgenesh1_pg.C_scaffold_14000098	>jgi|Dappu1|94022|fgenesh1_pg.C_scaffold_1000133	jgi|Dappu1|309564|NCBI_GNO_0100093	>jgi|Dappu1|101194|fgenesh1_pg.C_scaffold_17000145	>jgi|Dappu1|299961|PASA_GEN_0100218
>jgi|Dappu1|100204|fgenesh1_pg.C_scaffold_14000101	>jgi|Dappu1|219990|estExt_fgenesh1_pg.C_10137	jgi|Dappu1|232073|SNAP_00000131	>jgi|Dappu1|101201|fgenesh1_pg.C_scaffold_17000152	>jgi|Dappu1|94484|fgenesh1_pg.C_scaffold_1000595
>jgi|Dappu1|100205|fgenesh1_pg.C_scaffold_14000102	>jgi|Dappu1|232106|SNAP_00000164	jgi|Dappu1|232090|SNAP_00000148	>jgi|Dappu1|101223|fgenesh1_pg.C_scaffold_17000174	>jgi|Dappu1|299971|PASA_GEN_0100229
>jgi|Dappu1|100207|fgenesh1_pg.C_scaffold_14000104	>jgi|Dappu1|299814|PASA_GEN_0100039	jgi|Dappu1|232091|SNAP_00000149	>jgi|Dappu1|101429|fgenesh1_pg.C_scaffold_17000380	>jgi|Dappu1|310047|NCBI_GNO_0100580
>jgi|Dappu1|100208|fgenesh1_pg.C_scaffold_14000105	>jgi|Dappu1|219999|estExt_fgenesh1_pg.C_10153	jgi|Dappu1|309576|NCBI_GNO_0100105	>jgi|Dappu1|101478|fgenesh1_pg.C_scaffold_18000042	>jgi|Dappu1|232746|SNAP_00000804
>jgi|Dappu1|100217|fgenesh1_pg.C_scaffold_14000114	>jgi|Dappu1|232150|SNAP_00000208	jgi|Dappu1|94022|fgenesh1_pg.C_scaffold_1000133	>jgi|Dappu1|101510|fgenesh1_pg.C_scaffold_18000074	>jgi|Dappu1|94522|fgenesh1_pg.C_scaffold_1000633
>jgi|Dappu1|100218|fgenesh1_pg.C_scaffold_14000115	>jgi|Dappu1|232153|SNAP_00000211	jgi|Dappu1|232095|SNAP_00000153	>jgi|Dappu1|101550|fgenesh1_pg.C_scaffold_18000114	>jgi|Dappu1|310068|NCBI_GNO_0100601
>jgi|Dappu1|100222|fgenesh1_pg.C_scaffold_14000119	>jgi|Dappu1|299828|PASA_GEN_0100054	jgi|Dappu1|232096|SNAP_00000154	>jgi|Dappu1|101631|fgenesh1_pg.C_scaffold_18000195	>jgi|Dappu1|230361|estExt_fgenesh1_kg.C_50005
>jgi|Dappu1|100245|fgenesh1_pg.C_scaffold_14000142	>jgi|Dappu1|232162|SNAP_00000220	jgi|Dappu1|219990|estExt_fgenesh1_pg.C_10137	>jgi|Dappu1|101684|fgenesh1_pg.C_scaffold_18000248	>jgi|Dappu1|311910|NCBI_GNO_0500078
>jgi|Dappu1|100248|fgenesh1_pg.C_scaffold_14000145	>jgi|Dappu1|40007|e_gw1.1.979.1	jgi|Dappu1|232106|SNAP_00000164	>jgi|Dappu1|101790|fgenesh1_pg.C_scaffold_18000354	>jgi|Dappu1|311915|NCBI_GNO_0500083
>jgi|Dappu1|100249|fgenesh1_pg.C_scaffold_14000146	>jgi|Dappu1|94071|fgenesh1_pg.C_scaffold_1000182	jgi|Dappu1|299814|PASA_GEN_0100039	>jgi|Dappu1|101955|fgenesh1_pg.C_scaffold_19000149	>jgi|Dappu1|311923|NCBI_GNO_0500091
>jgi|Dappu1|100257|fgenesh1_pg.C_scaffold_14000154	>jgi|Dappu1|309625|NCBI_GNO_0100154	jgi|Dappu1|219999|estExt_fgenesh1_pg.C_10153	>jgi|Dappu1|102043|fgenesh1_pg.C_scaffold_19000237	>jgi|Dappu1|306374|PASA_GEN_0500029
>jgi|Dappu1|100258|fgenesh1_pg.C_scaffold_14000155	>jgi|Dappu1|94073|fgenesh1_pg.C_scaffold_1000184	jgi|Dappu1|299820|PASA_GEN_0100045	>jgi|Dappu1|102059|fgenesh1_pg.C_scaffold_20000014	>jgi|Dappu1|8650|gw1.5.131.1
>jgi|Dappu1|100262|fgenesh1_pg.C_scaffold_14000159	>jgi|Dappu1|232187|SNAP_00000245	jgi|Dappu1|232150|SNAP_00000208	>jgi|Dappu1|102364|fgenesh1_pg.C_scaffold_21000076	>jgi|Dappu1|311991|NCBI_GNO_0500160
>jgi|Dappu1|100263|fgenesh1_pg.C_scaffold_14000160	>jgi|Dappu1|299833|PASA_GEN_0100060	jgi|Dappu1|232153|SNAP_00000211	>jgi|Dappu1|102366|fgenesh1_pg.C_scaffold_21000078	>jgi|Dappu1|312000|NCBI_GNO_0500169
>jgi|Dappu1|100265|fgenesh1_pg.C_scaffold_14000162	>jgi|Dappu1|220021|estExt_fgenesh1_pg.C_10191	jgi|Dappu1|299828|PASA_GEN_0100054	>jgi|Dappu1|102473|fgenesh1_pg.C_scaffold_21000185	>jgi|Dappu1|96672|fgenesh1_pg.C_scaffold_5000167
>jgi|Dappu1|100276|fgenesh1_pg.C_scaffold_14000173	>jgi|Dappu1|309638|NCBI_GNO_0100167	jgi|Dappu1|232162|SNAP_00000220	>jgi|Dappu1|102489|fgenesh1_pg.C_scaffold_21000201	>jgi|Dappu1|96691|fgenesh1_pg.C_scaffold_5000186
>jgi|Dappu1|100280|fgenesh1_pg.C_scaffold_14000177	>jgi|Dappu1|220028|estExt_fgenesh1_pg.C_10201	jgi|Dappu1|40083|e_gw1.1.911.1	>jgi|Dappu1|102613|fgenesh1_pg.C_scaffold_22000036	>jgi|Dappu1|312026|NCBI_GNO_0500195
>jgi|Dappu1|100284|fgenesh1_pg.C_scaffold_14000181	>jgi|Dappu1|232204|SNAP_00000262	jgi|Dappu1|39283|e_gw1.1.134.1	>jgi|Dappu1|102698|fgenesh1_pg.C_scaffold_22000121	>jgi|Dappu1|312035|NCBI_GNO_0500204
>jgi|Dappu1|100315|fgenesh1_pg.C_scaffold_14000212	>jgi|Dappu1|300045|PASA_GEN_0100326	jgi|Dappu1|40007|e_gw1.1.979.1	>jgi|Dappu1|102703|fgenesh1_pg.C_scaffold_22000126	>jgi|Dappu1|306537|PASA_GEN_0500224
>jgi|Dappu1|100321|fgenesh1_pg.C_scaffold_14000218	>jgi|Dappu1|94101|fgenesh1_pg.C_scaffold_1000212	jgi|Dappu1|94071|fgenesh1_pg.C_scaffold_1000182	>jgi|Dappu1|102715|fgenesh1_pg.C_scaffold_22000138	>jgi|Dappu1|235306|SNAP_00003364
>jgi|Dappu1|100332|fgenesh1_pg.C_scaffold_14000229	>jgi|Dappu1|94102|fgenesh1_pg.C_scaffold_1000213	jgi|Dappu1|309625|NCBI_GNO_0100154	>jgi|Dappu1|102792|fgenesh1_pg.C_scaffold_23000028	>jgi|Dappu1|96721|fgenesh1_pg.C_scaffold_5000216
>jgi|Dappu1|100333|fgenesh1_pg.C_scaffold_14000230	>jgi|Dappu1|232220|SNAP_00000278	jgi|Dappu1|94073|fgenesh1_pg.C_scaffold_1000184	>jgi|Dappu1|102795|fgenesh1_pg.C_scaffold_23000031	>jgi|Dappu1|306542|PASA_GEN_0500229
>jgi|Dappu1|100339|fgenesh1_pg.C_scaffold_14000236	>jgi|Dappu1|232221|SNAP_00000279	jgi|Dappu1|232187|SNAP_00000245	>jgi|Dappu1|102823|fgenesh1_pg.C_scaffold_23000059	>jgi|Dappu1|312063|NCBI_GNO_0500232
>jgi|Dappu1|100340|fgenesh1_pg.C_scaffold_14000237	>jgi|Dappu1|299843|PASA_GEN_0100071	jgi|Dappu1|299833|PASA_GEN_0100060	>jgi|Dappu1|103017|fgenesh1_pg.C_scaffold_24000044	>jgi|Dappu1|306549|PASA_GEN_0500241
>jgi|Dappu1|100344|fgenesh1_pg.C_scaffold_14000241	>jgi|Dappu1|309663|NCBI_GNO_0100192	jgi|Dappu1|220021|estExt_fgenesh1_pg.C_10191	>jgi|Dappu1|103026|fgenesh1_pg.C_scaffold_24000053	>jgi|Dappu1|235385|SNAP_00003443
>jgi|Dappu1|100364|fgenesh1_pg.C_scaffold_14000261	>jgi|Dappu1|232236|SNAP_00000294	jgi|Dappu1|309638|NCBI_GNO_0100167	>jgi|Dappu1|10306|gw1.65.45.1	>jgi|Dappu1|207481|estExt_Genewise1.C_50447
>jgi|Dappu1|100368|fgenesh1_pg.C_scaffold_14000265	>jgi|Dappu1|94119|fgenesh1_pg.C_scaffold_1000230	jgi|Dappu1|220028|estExt_fgenesh1_pg.C_10201	>jgi|Dappu1|103117|fgenesh1_pg.C_scaffold_24000144	>jgi|Dappu1|306447|PASA_GEN_0500113
>jgi|Dappu1|100369|fgenesh1_pg.C_scaffold_14000266	>jgi|Dappu1|94124|fgenesh1_pg.C_scaffold_1000235	jgi|Dappu1|232204|SNAP_00000262	>jgi|Dappu1|103157|fgenesh1_pg.C_scaffold_24000184	>jgi|Dappu1|306450|PASA_GEN_0500116
>jgi|Dappu1|100374|fgenesh1_pg.C_scaffold_14000271	>jgi|Dappu1|35705|gw1.1.967.1	jgi|Dappu1|300045|PASA_GEN_0100326	>jgi|Dappu1|103158|fgenesh1_pg.C_scaffold_24000185	>jgi|Dappu1|312181|NCBI_GNO_0500351
>jgi|Dappu1|100385|fgenesh1_pg.C_scaffold_14000282	>jgi|Dappu1|299847|PASA_GEN_0100077	jgi|Dappu1|309643|NCBI_GNO_0100172	>jgi|Dappu1|103160|fgenesh1_pg.C_scaffold_24000187	>jgi|Dappu1|306583|PASA_GEN_0500286
>jgi|Dappu1|100387|fgenesh1_pg.C_scaffold_14000284	>jgi|Dappu1|300060|PASA_GEN_0100347	jgi|Dappu1|309644|NCBI_GNO_0100173	>jgi|Dappu1|103172|fgenesh1_pg.C_scaffold_24000199	>jgi|Dappu1|306461|PASA_GEN_0500128
>jgi|Dappu1|100388|fgenesh1_pg.C_scaffold_14000285	>jgi|Dappu1|232249|SNAP_00000307	jgi|Dappu1|299839|PASA_GEN_0100067	>jgi|Dappu1|103181|fgenesh1_pg.C_scaffold_24000208	>jgi|Dappu1|42271|e_gw1.4.324.1
>jgi|Dappu1|100403|fgenesh1_pg.C_scaffold_14000300	>jgi|Dappu1|220051|estExt_fgenesh1_pg.C_10242	jgi|Dappu1|94100|fgenesh1_pg.C_scaffold_1000211	>jgi|Dappu1|103525|fgenesh1_pg.C_scaffold_25000282	>jgi|Dappu1|95934|fgenesh1_pg.C_scaffold_4000050
>jgi|Dappu1|100405|fgenesh1_pg.C_scaffold_14000302	>jgi|Dappu1|94137|fgenesh1_pg.C_scaffold_1000248	jgi|Dappu1|94101|fgenesh1_pg.C_scaffold_1000212	>jgi|Dappu1|103527|fgenesh1_pg.C_scaffold_25000284	>jgi|Dappu1|311281|NCBI_GNO_0400053
>jgi|Dappu1|100422|fgenesh1_pg.C_scaffold_14000319	>jgi|Dappu1|232256|SNAP_00000314	jgi|Dappu1|94102|fgenesh1_pg.C_scaffold_1000213	>jgi|Dappu1|103565|fgenesh1_pg.C_scaffold_26000004	>jgi|Dappu1|305433|PASA_GEN_0400023
>jgi|Dappu1|100424|fgenesh1_pg.C_scaffold_14000321	>jgi|Dappu1|232278|SNAP_00000336	jgi|Dappu1|232220|SNAP_00000278	>jgi|Dappu1|103604|fgenesh1_pg.C_scaffold_26000043	>jgi|Dappu1|95947|fgenesh1_pg.C_scaffold_4000063
>jgi|Dappu1|100426|fgenesh1_pg.C_scaffold_14000323	>jgi|Dappu1|232281|SNAP_00000339	jgi|Dappu1|232221|SNAP_00000279	>jgi|Dappu1|103725|fgenesh1_pg.C_scaffold_26000164	>jgi|Dappu1|305439|PASA_GEN_0400029
>jgi|Dappu1|100433|fgenesh1_pg.C_scaffold_14000330	>jgi|Dappu1|309695|NCBI_GNO_0100224	jgi|Dappu1|299843|PASA_GEN_0100071	>jgi|Dappu1|103817|fgenesh1_pg.C_scaffold_27000064	>jgi|Dappu1|305597|PASA_GEN_0400219
>jgi|Dappu1|100451|fgenesh1_pg.C_scaffold_15000016	>jgi|Dappu1|309696|NCBI_GNO_0100225	jgi|Dappu1|309663|NCBI_GNO_0100192	>jgi|Dappu1|103888|fgenesh1_pg.C_scaffold_27000135	>jgi|Dappu1|305598|PASA_GEN_0400220
>jgi|Dappu1|100454|fgenesh1_pg.C_scaffold_15000019	>jgi|Dappu1|309698|NCBI_GNO_0100227	jgi|Dappu1|232236|SNAP_00000294	>jgi|Dappu1|103904|fgenesh1_pg.C_scaffold_28000015	>jgi|Dappu1|42599|e_gw1.4.864.1
>jgi|Dappu1|100462|fgenesh1_pg.C_scaffold_15000027	>jgi|Dappu1|299852|PASA_GEN_0100083	jgi|Dappu1|94119|fgenesh1_pg.C_scaffold_1000230	>jgi|Dappu1|103943|fgenesh1_pg.C_scaffold_28000054	>jgi|Dappu1|311374|NCBI_GNO_0400147
>jgi|Dappu1|100467|fgenesh1_pg.C_scaffold_15000032	>jgi|Dappu1|33380|gw1.1.915.1	jgi|Dappu1|94123|fgenesh1_pg.C_scaffold_1000234	>jgi|Dappu1|103946|fgenesh1_pg.C_scaffold_28000057	>jgi|Dappu1|311404|NCBI_GNO_0400177
>jgi|Dappu1|100474|fgenesh1_pg.C_scaffold_15000039	>jgi|Dappu1|232289|SNAP_00000347	jgi|Dappu1|94124|fgenesh1_pg.C_scaffold_1000235	>jgi|Dappu1|104014|fgenesh1_pg.C_scaffold_28000125	>jgi|Dappu1|311415|NCBI_GNO_0400188
>jgi|Dappu1|100505|fgenesh1_pg.C_scaffold_15000070	>jgi|Dappu1|309707|NCBI_GNO_0100236	jgi|Dappu1|309672|NCBI_GNO_0100201	>jgi|Dappu1|104147|fgenesh1_pg.C_scaffold_29000026	>jgi|Dappu1|311417|NCBI_GNO_0400190
>jgi|Dappu1|100529|fgenesh1_pg.C_scaffold_15000094	>jgi|Dappu1|190026|estExt_Genewise1Plus.C_10373	jgi|Dappu1|35705|gw1.1.967.1	>jgi|Dappu1|104152|fgenesh1_pg.C_scaffold_29000031	>jgi|Dappu1|234541|SNAP_00002599
>jgi|Dappu1|100542|fgenesh1_pg.C_scaffold_15000107	>jgi|Dappu1|94160|fgenesh1_pg.C_scaffold_1000271	jgi|Dappu1|299847|PASA_GEN_0100077	>jgi|Dappu1|104193|fgenesh1_pg.C_scaffold_29000072	>jgi|Dappu1|305471|PASA_GEN_0400068
>jgi|Dappu1|100544|fgenesh1_pg.C_scaffold_15000109	>jgi|Dappu1|299857|PASA_GEN_0100089	jgi|Dappu1|300060|PASA_GEN_0100347	>jgi|Dappu1|104196|fgenesh1_pg.C_scaffold_29000075	>jgi|Dappu1|96105|fgenesh1_pg.C_scaffold_4000221
>jgi|Dappu1|100593|fgenesh1_pg.C_scaffold_15000158	>jgi|Dappu1|299859|PASA_GEN_0100091	jgi|Dappu1|232249|SNAP_00000307	>jgi|Dappu1|104230|fgenesh1_pg.C_scaffold_29000109	>jgi|Dappu1|305642|PASA_GEN_0400277
>jgi|Dappu1|100643|fgenesh1_pg.C_scaffold_15000208	>jgi|Dappu1|299860|PASA_GEN_0100092	jgi|Dappu1|220051|estExt_fgenesh1_pg.C_10242	>jgi|Dappu1|104231|fgenesh1_pg.C_scaffold_29000110	>jgi|Dappu1|305492|PASA_GEN_0400091
>jgi|Dappu1|100668|fgenesh1_pg.C_scaffold_15000233	>jgi|Dappu1|220078|estExt_fgenesh1_pg.C_10285	jgi|Dappu1|94137|fgenesh1_pg.C_scaffold_1000248	>jgi|Dappu1|104233|fgenesh1_pg.C_scaffold_29000112	>jgi|Dappu1|221220|estExt_fgenesh1_pg.C_40269
>jgi|Dappu1|100671|fgenesh1_pg.C_scaffold_15000236	>jgi|Dappu1|299863|PASA_GEN_0100095	jgi|Dappu1|232256|SNAP_00000314	>jgi|Dappu1|104361|fgenesh1_pg.C_scaffold_30000006	>jgi|Dappu1|305495|PASA_GEN_0400095
>jgi|Dappu1|100684|fgenesh1_pg.C_scaffold_15000249	>jgi|Dappu1|309731|NCBI_GNO_0100262	jgi|Dappu1|232278|SNAP_00000336	>jgi|Dappu1|104362|fgenesh1_pg.C_scaffold_30000007	>jgi|Dappu1|234666|SNAP_00002724
>jgi|Dappu1|100688|fgenesh1_pg.C_scaffold_15000253	>jgi|Dappu1|309734|NCBI_GNO_0100265	jgi|Dappu1|232281|SNAP_00000339	>jgi|Dappu1|104383|fgenesh1_pg.C_scaffold_30000028	>jgi|Dappu1|221227|estExt_fgenesh1_pg.C_40282
>jgi|Dappu1|100696|fgenesh1_pg.C_scaffold_15000261	>jgi|Dappu1|232322|SNAP_00000380	jgi|Dappu1|309695|NCBI_GNO_0100224	>jgi|Dappu1|104438|fgenesh1_pg.C_scaffold_30000083	>jgi|Dappu1|96174|fgenesh1_pg.C_scaffold_4000290
>jgi|Dappu1|100697|fgenesh1_pg.C_scaffold_15000262	>jgi|Dappu1|309736|NCBI_GNO_0100267	jgi|Dappu1|309696|NCBI_GNO_0100225	>jgi|Dappu1|104556|fgenesh1_pg.C_scaffold_31000019	>jgi|Dappu1|96187|fgenesh1_pg.C_scaffold_4000303
>jgi|Dappu1|100709|fgenesh1_pg.C_scaffold_15000274	>jgi|Dappu1|232329|SNAP_00000387	jgi|Dappu1|309698|NCBI_GNO_0100227	>jgi|Dappu1|104684|fgenesh1_pg.C_scaffold_31000147	>jgi|Dappu1|221249|estExt_fgenesh1_pg.C_40308
>jgi|Dappu1|100710|fgenesh1_pg.C_scaffold_15000275	>jgi|Dappu1|299864|PASA_GEN_0100096	jgi|Dappu1|300065|PASA_GEN_0100354	>jgi|Dappu1|104822|fgenesh1_pg.C_scaffold_32000135	>jgi|Dappu1|25900|gw1.4.644.1
>jgi|Dappu1|100718|fgenesh1_pg.C_scaffold_15000283	>jgi|Dappu1|299867|PASA_GEN_0100101	jgi|Dappu1|299852|PASA_GEN_0100083	>jgi|Dappu1|104846|fgenesh1_pg.C_scaffold_33000015	>jgi|Dappu1|305680|PASA_GEN_0400322
>jgi|Dappu1|100733|fgenesh1_pg.C_scaffold_15000298	>jgi|Dappu1|299868|PASA_GEN_0100102	jgi|Dappu1|33380|gw1.1.915.1	>jgi|Dappu1|104885|fgenesh1_pg.C_scaffold_33000054	>jgi|Dappu1|96245|fgenesh1_pg.C_scaffold_4000361
>jgi|Dappu1|100734|fgenesh1_pg.C_scaffold_15000299	>jgi|Dappu1|232336|SNAP_00000394	jgi|Dappu1|232289|SNAP_00000347	>jgi|Dappu1|104935|fgenesh1_pg.C_scaffold_33000104	>jgi|Dappu1|311613|NCBI_GNO_0400387
>jgi|Dappu1|100741|fgenesh1_pg.C_scaffold_15000306	>jgi|Dappu1|232341|SNAP_00000399	jgi|Dappu1|309707|NCBI_GNO_0100236	>jgi|Dappu1|104959|fgenesh1_pg.C_scaffold_33000128	>jgi|Dappu1|191862|estExt_Genewise1Plus.C_40607
>jgi|Dappu1|100743|fgenesh1_pg.C_scaffold_15000308	>jgi|Dappu1|299869|PASA_GEN_0100103	jgi|Dappu1|190026|estExt_Genewise1Plus.C_10373	>jgi|Dappu1|104981|fgenesh1_pg.C_scaffold_33000150	>jgi|Dappu1|234781|SNAP_00002839
>jgi|Dappu1|100744|fgenesh1_pg.C_scaffold_15000309	>jgi|Dappu1|232346|SNAP_00000404	jgi|Dappu1|300068|PASA_GEN_0100358	>jgi|Dappu1|104992|fgenesh1_pg.C_scaffold_34000001	>jgi|Dappu1|96286|fgenesh1_pg.C_scaffold_4000402
>jgi|Dappu1|100756|fgenesh1_pg.C_scaffold_16000001	>jgi|Dappu1|299870|PASA_GEN_0100104	jgi|Dappu1|94160|fgenesh1_pg.C_scaffold_1000271	>jgi|Dappu1|105003|fgenesh1_pg.C_scaffold_34000012	>jgi|Dappu1|96311|fgenesh1_pg.C_scaffold_4000427
>jgi|Dappu1|100771|fgenesh1_pg.C_scaffold_16000016	>jgi|Dappu1|300081|PASA_GEN_0100377	jgi|Dappu1|299857|PASA_GEN_0100089	>jgi|Dappu1|105042|fgenesh1_pg.C_scaffold_34000051	>jgi|Dappu1|230332|estExt_fgenesh1_kg.C_40042
>jgi|Dappu1|100774|fgenesh1_pg.C_scaffold_16000019	>jgi|Dappu1|232350|SNAP_00000408	jgi|Dappu1|299859|PASA_GEN_0100091	>jgi|Dappu1|105048|fgenesh1_pg.C_scaffold_34000057	>jgi|Dappu1|311662|NCBI_GNO_0400436
>jgi|Dappu1|100775|fgenesh1_pg.C_scaffold_16000020	>jgi|Dappu1|232355|SNAP_00000413	jgi|Dappu1|299860|PASA_GEN_0100092	>jgi|Dappu1|105059|fgenesh1_pg.C_scaffold_34000068	>jgi|Dappu1|42066|e_gw1.4.592.1
>jgi|Dappu1|100783|fgenesh1_pg.C_scaffold_16000028	>jgi|Dappu1|299874|PASA_GEN_0100108	jgi|Dappu1|220078|estExt_fgenesh1_pg.C_10285	>jgi|Dappu1|105073|fgenesh1_pg.C_scaffold_34000082	>jgi|Dappu1|311665|NCBI_GNO_0400439
>jgi|Dappu1|100787|fgenesh1_pg.C_scaffold_16000032	>jgi|Dappu1|300087|PASA_GEN_0100385	jgi|Dappu1|299863|PASA_GEN_0100095	>jgi|Dappu1|105109|fgenesh1_pg.C_scaffold_34000118	>jgi|Dappu1|234838|SNAP_00002896
>jgi|Dappu1|100788|fgenesh1_pg.C_scaffold_16000033	>jgi|Dappu1|299877|PASA_GEN_0100111	jgi|Dappu1|309731|NCBI_GNO_0100262	>jgi|Dappu1|105130|fgenesh1_pg.C_scaffold_34000139	>jgi|Dappu1|96323|fgenesh1_pg.C_scaffold_4000439
>jgi|Dappu1|100791|fgenesh1_pg.C_scaffold_16000036	>jgi|Dappu1|299878|PASA_GEN_0100112	jgi|Dappu1|309734|NCBI_GNO_0100265	>jgi|Dappu1|105157|fgenesh1_pg.C_scaffold_35000025	>jgi|Dappu1|230333|estExt_fgenesh1_kg.C_40046
>jgi|Dappu1|100812|fgenesh1_pg.C_scaffold_16000057	>jgi|Dappu1|299880|PASA_GEN_0100114	jgi|Dappu1|232322|SNAP_00000380	>jgi|Dappu1|105158|fgenesh1_pg.C_scaffold_35000026	>jgi|Dappu1|207089|estExt_Genewise1.C_40756
>jgi|Dappu1|100825|fgenesh1_pg.C_scaffold_16000070	>jgi|Dappu1|232381|SNAP_00000439	jgi|Dappu1|309736|NCBI_GNO_0100267	>jgi|Dappu1|105159|fgenesh1_pg.C_scaffold_35000027	>jgi|Dappu1|96436|fgenesh1_pg.C_scaffold_4000552
>jgi|Dappu1|100842|fgenesh1_pg.C_scaffold_16000087	>jgi|Dappu1|94230|fgenesh1_pg.C_scaffold_1000341	jgi|Dappu1|232329|SNAP_00000387	>jgi|Dappu1|105168|fgenesh1_pg.C_scaffold_35000036	>jgi|Dappu1|230342|estExt_fgenesh1_kg.C_40055
>jgi|Dappu1|100843|fgenesh1_pg.C_scaffold_16000088	>jgi|Dappu1|309785|NCBI_GNO_0100316	jgi|Dappu1|299864|PASA_GEN_0100096	>jgi|Dappu1|105253|fgenesh1_pg.C_scaffold_35000121	>jgi|Dappu1|305563|PASA_GEN_0400179
>jgi|Dappu1|100849|fgenesh1_pg.C_scaffold_16000094	>jgi|Dappu1|300101|PASA_GEN_0100404	jgi|Dappu1|299867|PASA_GEN_0100101	>jgi|Dappu1|105308|fgenesh1_pg.C_scaffold_36000009	>jgi|Dappu1|96503|fgenesh1_pg.C_scaffold_4000619
>jgi|Dappu1|100850|fgenesh1_pg.C_scaffold_16000095	>jgi|Dappu1|299887|PASA_GEN_0100121	jgi|Dappu1|299868|PASA_GEN_0100102	>jgi|Dappu1|105309|fgenesh1_pg.C_scaffold_36000010	>jgi|Dappu1|92123|fgenesh1_kg.C_scaffold_6000002
>jgi|Dappu1|100862|fgenesh1_pg.C_scaffold_16000107	>jgi|Dappu1|300105|PASA_GEN_0100408	jgi|Dappu1|232336|SNAP_00000394	>jgi|Dappu1|105310|fgenesh1_pg.C_scaffold_36000011	>jgi|Dappu1|96952|fgenesh1_pg.C_scaffold_6000019
>jgi|Dappu1|100866|fgenesh1_pg.C_scaffold_16000111	>jgi|Dappu1|39372|e_gw1.1.728.1	jgi|Dappu1|309748|NCBI_GNO_0100279	>jgi|Dappu1|105311|fgenesh1_pg.C_scaffold_36000012	>jgi|Dappu1|312223|NCBI_GNO_0600019
>jgi|Dappu1|100870|fgenesh1_pg.C_scaffold_16000115	>jgi|Dappu1|299893|PASA_GEN_0100128	jgi|Dappu1|232341|SNAP_00000399	>jgi|Dappu1|105313|fgenesh1_pg.C_scaffold_36000014	>jgi|Dappu1|312225|NCBI_GNO_0600021
>jgi|Dappu1|100876|fgenesh1_pg.C_scaffold_16000121	>jgi|Dappu1|300108|PASA_GEN_0100411	jgi|Dappu1|299869|PASA_GEN_0100103	>jgi|Dappu1|105337|fgenesh1_pg.C_scaffold_36000038	>jgi|Dappu1|96961|fgenesh1_pg.C_scaffold_6000028
>jgi|Dappu1|100879|fgenesh1_pg.C_scaffold_16000124	>jgi|Dappu1|230092|estExt_fgenesh1_kg.C_10029	jgi|Dappu1|232346|SNAP_00000404	>jgi|Dappu1|105346|fgenesh1_pg.C_scaffold_36000047	>jgi|Dappu1|235623|SNAP_00003681
>jgi|Dappu1|100888|fgenesh1_pg.C_scaffold_16000133	>jgi|Dappu1|300109|PASA_GEN_0100413	jgi|Dappu1|299870|PASA_GEN_0100104	>jgi|Dappu1|105376|fgenesh1_pg.C_scaffold_36000077	>jgi|Dappu1|307119|PASA_GEN_0600064
>jgi|Dappu1|100890|fgenesh1_pg.C_scaffold_16000135	>jgi|Dappu1|309814|NCBI_GNO_0100345	jgi|Dappu1|300081|PASA_GEN_0100377	>jgi|Dappu1|105382|fgenesh1_pg.C_scaffold_36000083	>jgi|Dappu1|97084|fgenesh1_pg.C_scaffold_6000151
>jgi|Dappu1|100891|fgenesh1_pg.C_scaffold_16000136	>jgi|Dappu1|309818|NCBI_GNO_0100349	jgi|Dappu1|232350|SNAP_00000408	>jgi|Dappu1|105418|fgenesh1_pg.C_scaffold_36000119	>jgi|Dappu1|312376|NCBI_GNO_0600175
>jgi|Dappu1|100898|fgenesh1_pg.C_scaffold_16000143	>jgi|Dappu1|300112|PASA_GEN_0100416	jgi|Dappu1|94205|fgenesh1_pg.C_scaffold_1000316	>jgi|Dappu1|105421|fgenesh1_pg.C_scaffold_36000122	>jgi|Dappu1|97119|fgenesh1_pg.C_scaffold_6000186
>jgi|Dappu1|100902|fgenesh1_pg.C_scaffold_16000147	>jgi|Dappu1|299900|PASA_GEN_0100136	jgi|Dappu1|232355|SNAP_00000413	>jgi|Dappu1|105452|fgenesh1_pg.C_scaffold_36000153	>jgi|Dappu1|235733|SNAP_00003791
>jgi|Dappu1|100906|fgenesh1_pg.C_scaffold_16000151	>jgi|Dappu1|309824|NCBI_GNO_0100355	jgi|Dappu1|299874|PASA_GEN_0100108	>jgi|Dappu1|105498|fgenesh1_pg.C_scaffold_36000199	>jgi|Dappu1|312415|NCBI_GNO_0600214
>jgi|Dappu1|100919|fgenesh1_pg.C_scaffold_16000164	>jgi|Dappu1|232427|SNAP_00000485	jgi|Dappu1|300087|PASA_GEN_0100385	>jgi|Dappu1|105505|fgenesh1_pg.C_scaffold_36000206	>jgi|Dappu1|312424|NCBI_GNO_0600223
>jgi|Dappu1|100927|fgenesh1_pg.C_scaffold_16000172	>jgi|Dappu1|299908|PASA_GEN_0100148	jgi|Dappu1|300088|PASA_GEN_0100386	>jgi|Dappu1|105531|fgenesh1_pg.C_scaffold_36000232	>jgi|Dappu1|312479|NCBI_GNO_0600278
>jgi|Dappu1|100928|fgenesh1_pg.C_scaffold_16000173	>jgi|Dappu1|232448|SNAP_00000506	jgi|Dappu1|299877|PASA_GEN_0100111	>jgi|Dappu1|105539|fgenesh1_pg.C_scaffold_37000007	>jgi|Dappu1|312480|NCBI_GNO_0600279
>jgi|Dappu1|100930|fgenesh1_pg.C_scaffold_16000175	>jgi|Dappu1|309848|NCBI_GNO_0100380	jgi|Dappu1|299878|PASA_GEN_0100112	>jgi|Dappu1|105542|fgenesh1_pg.C_scaffold_37000010	>jgi|Dappu1|312486|NCBI_GNO_0600285
>jgi|Dappu1|100944|fgenesh1_pg.C_scaffold_16000189	>jgi|Dappu1|309850|NCBI_GNO_0100382	jgi|Dappu1|299880|PASA_GEN_0100114	>jgi|Dappu1|105584|fgenesh1_pg.C_scaffold_37000052	>jgi|Dappu1|312488|NCBI_GNO_0600287
>jgi|Dappu1|100953|fgenesh1_pg.C_scaffold_16000198	>jgi|Dappu1|309852|NCBI_GNO_0100384	jgi|Dappu1|232381|SNAP_00000439	>jgi|Dappu1|105611|fgenesh1_pg.C_scaffold_37000079	>jgi|Dappu1|312499|NCBI_GNO_0600298
>jgi|Dappu1|100957|fgenesh1_pg.C_scaffold_16000202	>jgi|Dappu1|94295|fgenesh1_pg.C_scaffold_1000406	jgi|Dappu1|232382|SNAP_00000440	>jgi|Dappu1|105613|fgenesh1_pg.C_scaffold_37000081	>jgi|Dappu1|307131|PASA_GEN_0600102
>jgi|Dappu1|100959|fgenesh1_pg.C_scaffold_16000204	>jgi|Dappu1|300120|PASA_GEN_0100428	jgi|Dappu1|299882|PASA_GEN_0100116	>jgi|Dappu1|105619|fgenesh1_pg.C_scaffold_37000087	>jgi|Dappu1|307134|PASA_GEN_0600107
>jgi|Dappu1|100962|fgenesh1_pg.C_scaffold_16000207	>jgi|Dappu1|232462|SNAP_00000520	jgi|Dappu1|300097|PASA_GEN_0100399	>jgi|Dappu1|105679|fgenesh1_pg.C_scaffold_38000005	>jgi|Dappu1|221787|estExt_fgenesh1_pg.C_60329
>jgi|Dappu1|100968|fgenesh1_pg.C_scaffold_16000213	>jgi|Dappu1|232463|SNAP_00000521	jgi|Dappu1|94230|fgenesh1_pg.C_scaffold_1000341	>jgi|Dappu1|105703|fgenesh1_pg.C_scaffold_38000029	>jgi|Dappu1|235973|SNAP_00004031
>jgi|Dappu1|100970|fgenesh1_pg.C_scaffold_16000215	>jgi|Dappu1|309857|NCBI_GNO_0100389	jgi|Dappu1|309785|NCBI_GNO_0100316	>jgi|Dappu1|105704|fgenesh1_pg.C_scaffold_38000030	>jgi|Dappu1|43755|e_gw1.6.698.1
>jgi|Dappu1|100983|fgenesh1_pg.C_scaffold_16000228	>jgi|Dappu1|309860|NCBI_GNO_0100392	jgi|Dappu1|309788|NCBI_GNO_0100319	>jgi|Dappu1|105768|fgenesh1_pg.C_scaffold_38000094	>jgi|Dappu1|312611|NCBI_GNO_0600410
>jgi|Dappu1|100990|fgenesh1_pg.C_scaffold_16000235	>jgi|Dappu1|232470|SNAP_00000528	jgi|Dappu1|300101|PASA_GEN_0100404	>jgi|Dappu1|105813|fgenesh1_pg.C_scaffold_38000139	>jgi|Dappu1|307148|PASA_GEN_0600122
>jgi|Dappu1|100994|fgenesh1_pg.C_scaffold_16000239	>jgi|Dappu1|309869|NCBI_GNO_0100401	jgi|Dappu1|299887|PASA_GEN_0100121	>jgi|Dappu1|105818|fgenesh1_pg.C_scaffold_38000144	>jgi|Dappu1|312639|NCBI_GNO_0600444
>jgi|Dappu1|100996|fgenesh1_pg.C_scaffold_16000241	>jgi|Dappu1|220171|estExt_fgenesh1_pg.C_10430	jgi|Dappu1|300105|PASA_GEN_0100408	>jgi|Dappu1|105831|fgenesh1_pg.C_scaffold_39000012	>jgi|Dappu1|236043|SNAP_00004101
>jgi|Dappu1|101004|fgenesh1_pg.C_scaffold_16000249	>jgi|Dappu1|309890|NCBI_GNO_0100422	jgi|Dappu1|220118|estExt_fgenesh1_pg.C_10348	>jgi|Dappu1|105881|fgenesh1_pg.C_scaffold_39000062	>jgi|Dappu1|221835|estExt_fgenesh1_pg.C_60437
>jgi|Dappu1|101005|fgenesh1_pg.C_scaffold_16000250	>jgi|Dappu1|94343|fgenesh1_pg.C_scaffold_1000454	jgi|Dappu1|39372|e_gw1.1.728.1	>jgi|Dappu1|105893|fgenesh1_pg.C_scaffold_39000074	>jgi|Dappu1|236047|SNAP_00004105
>jgi|Dappu1|101008|fgenesh1_pg.C_scaffold_16000253	>jgi|Dappu1|309894|NCBI_GNO_0100426	jgi|Dappu1|309800|NCBI_GNO_0100331	>jgi|Dappu1|106066|fgenesh1_pg.C_scaffold_40000101	>jgi|Dappu1|236051|SNAP_00004109
>jgi|Dappu1|101011|fgenesh1_pg.C_scaffold_16000256	>jgi|Dappu1|309896|NCBI_GNO_0100428	jgi|Dappu1|309801|NCBI_GNO_0100332	>jgi|Dappu1|106070|fgenesh1_pg.C_scaffold_40000105	>jgi|Dappu1|312654|NCBI_GNO_0600459
>jgi|Dappu1|101017|fgenesh1_pg.C_scaffold_16000262	>jgi|Dappu1|94360|fgenesh1_pg.C_scaffold_1000471	jgi|Dappu1|299893|PASA_GEN_0100128	>jgi|Dappu1|106095|fgenesh1_pg.C_scaffold_40000130	>jgi|Dappu1|236082|SNAP_00004140
>jgi|Dappu1|101027|fgenesh1_pg.C_scaffold_16000272	>jgi|Dappu1|94363|fgenesh1_pg.C_scaffold_1000474	jgi|Dappu1|300108|PASA_GEN_0100411	>jgi|Dappu1|106106|fgenesh1_pg.C_scaffold_40000141	>jgi|Dappu1|221844|estExt_fgenesh1_pg.C_60467
>jgi|Dappu1|101032|fgenesh1_pg.C_scaffold_16000277	>jgi|Dappu1|94366|fgenesh1_pg.C_scaffold_1000477	jgi|Dappu1|230092|estExt_fgenesh1_kg.C_10029	>jgi|Dappu1|106124|fgenesh1_pg.C_scaffold_40000159	>jgi|Dappu1|236090|SNAP_00004148
>jgi|Dappu1|101076|fgenesh1_pg.C_scaffold_17000027	>jgi|Dappu1|309904|NCBI_GNO_0100436	jgi|Dappu1|300109|PASA_GEN_0100413	>jgi|Dappu1|106153|fgenesh1_pg.C_scaffold_40000188	>jgi|Dappu1|192749|estExt_Genewise1Plus.C_60824
>jgi|Dappu1|101078|fgenesh1_pg.C_scaffold_17000029	>jgi|Dappu1|232528|SNAP_00000586	jgi|Dappu1|309814|NCBI_GNO_0100345	>jgi|Dappu1|106161|fgenesh1_pg.C_scaffold_41000006	>jgi|Dappu1|221856|estExt_fgenesh1_pg.C_60502
>jgi|Dappu1|101079|fgenesh1_pg.C_scaffold_17000030	>jgi|Dappu1|220196|estExt_fgenesh1_pg.C_10475	jgi|Dappu1|309817|NCBI_GNO_0100348	>jgi|Dappu1|106174|fgenesh1_pg.C_scaffold_41000019	>jgi|Dappu1|307163|PASA_GEN_0600145
>jgi|Dappu1|101081|fgenesh1_pg.C_scaffold_17000032	>jgi|Dappu1|300137|PASA_GEN_0100449	jgi|Dappu1|309818|NCBI_GNO_0100349	>jgi|Dappu1|106183|fgenesh1_pg.C_scaffold_41000028	>jgi|Dappu1|221858|estExt_fgenesh1_pg.C_60505
>jgi|Dappu1|101083|fgenesh1_pg.C_scaffold_17000034	>jgi|Dappu1|232534|SNAP_00000592	jgi|Dappu1|300112|PASA_GEN_0100416	>jgi|Dappu1|106229|fgenesh1_pg.C_scaffold_41000074	>jgi|Dappu1|319707|NCBI_GNO_3100004
>jgi|Dappu1|101084|fgenesh1_pg.C_scaffold_17000035	>jgi|Dappu1|300138|PASA_GEN_0100450	jgi|Dappu1|205294|estExt_Genewise1.C_10536	>jgi|Dappu1|106233|fgenesh1_pg.C_scaffold_41000078	>jgi|Dappu1|304900|PASA_GEN_3100001
>jgi|Dappu1|101087|fgenesh1_pg.C_scaffold_17000038	>jgi|Dappu1|220200|estExt_fgenesh1_pg.C_10482	jgi|Dappu1|299900|PASA_GEN_0100136	>jgi|Dappu1|106646|fgenesh1_pg.C_scaffold_44000019	>jgi|Dappu1|245164|SNAP_00013222
>jgi|Dappu1|101088|fgenesh1_pg.C_scaffold_17000039	>jgi|Dappu1|299926|PASA_GEN_0100172	jgi|Dappu1|309824|NCBI_GNO_0100355	>jgi|Dappu1|106660|fgenesh1_pg.C_scaffold_44000033	>jgi|Dappu1|304944|PASA_GEN_3100052
>jgi|Dappu1|101102|fgenesh1_pg.C_scaffold_17000053	>jgi|Dappu1|299927|PASA_GEN_0100173	jgi|Dappu1|309825|NCBI_GNO_0100356	>jgi|Dappu1|106664|fgenesh1_pg.C_scaffold_44000037	>jgi|Dappu1|304910|PASA_GEN_3100013
>jgi|Dappu1|101109|fgenesh1_pg.C_scaffold_17000060	>jgi|Dappu1|220202|estExt_fgenesh1_pg.C_10484	jgi|Dappu1|232427|SNAP_00000485	>jgi|Dappu1|106666|fgenesh1_pg.C_scaffold_44000039	>jgi|Dappu1|319819|NCBI_GNO_3100116
>jgi|Dappu1|101112|fgenesh1_pg.C_scaffold_17000063	>jgi|Dappu1|309918|NCBI_GNO_0100450	jgi|Dappu1|299908|PASA_GEN_0100148	>jgi|Dappu1|106728|fgenesh1_pg.C_scaffold_44000101	>jgi|Dappu1|319860|NCBI_GNO_3100157
>jgi|Dappu1|101116|fgenesh1_pg.C_scaffold_17000067	>jgi|Dappu1|299931|PASA_GEN_0100179	jgi|Dappu1|232448|SNAP_00000506	>jgi|Dappu1|106748|fgenesh1_pg.C_scaffold_44000121	>jgi|Dappu1|314619|NCBI_GNO_1200043
>jgi|Dappu1|101118|fgenesh1_pg.C_scaffold_17000069	>jgi|Dappu1|309923|NCBI_GNO_0100456	jgi|Dappu1|309848|NCBI_GNO_0100380	>jgi|Dappu1|106763|fgenesh1_pg.C_scaffold_44000136	>jgi|Dappu1|238610|SNAP_00006668
>jgi|Dappu1|101120|fgenesh1_pg.C_scaffold_17000071	>jgi|Dappu1|300142|PASA_GEN_0100454	jgi|Dappu1|309850|NCBI_GNO_0100382	>jgi|Dappu1|106838|fgenesh1_pg.C_scaffold_45000074	>jgi|Dappu1|314624|NCBI_GNO_1200048
>jgi|Dappu1|101128|fgenesh1_pg.C_scaffold_17000079	>jgi|Dappu1|299937|PASA_GEN_0100187	jgi|Dappu1|309852|NCBI_GNO_0100384	>jgi|Dappu1|106867|fgenesh1_pg.C_scaffold_45000103	>jgi|Dappu1|238628|SNAP_00006686
>jgi|Dappu1|101160|fgenesh1_pg.C_scaffold_17000111	>jgi|Dappu1|232555|SNAP_00000613	jgi|Dappu1|94295|fgenesh1_pg.C_scaffold_1000406	>jgi|Dappu1|106881|fgenesh1_pg.C_scaffold_45000117	>jgi|Dappu1|314654|NCBI_GNO_1200078
>jgi|Dappu1|101165|fgenesh1_pg.C_scaffold_17000116	>jgi|Dappu1|232579|SNAP_00000637	jgi|Dappu1|300120|PASA_GEN_0100428	>jgi|Dappu1|106886|fgenesh1_pg.C_scaffold_45000122	>jgi|Dappu1|222913|estExt_fgenesh1_pg.C_120095
>jgi|Dappu1|101167|fgenesh1_pg.C_scaffold_17000118	>jgi|Dappu1|309949|NCBI_GNO_0100482	jgi|Dappu1|232462|SNAP_00000520	>jgi|Dappu1|106890|fgenesh1_pg.C_scaffold_45000126	>jgi|Dappu1|314698|NCBI_GNO_1200122
>jgi|Dappu1|101170|fgenesh1_pg.C_scaffold_17000121	>jgi|Dappu1|309950|NCBI_GNO_0100483	jgi|Dappu1|232463|SNAP_00000521	>jgi|Dappu1|106939|fgenesh1_pg.C_scaffold_46000040	>jgi|Dappu1|99525|fgenesh1_pg.C_scaffold_12000134
>jgi|Dappu1|101171|fgenesh1_pg.C_scaffold_17000122	>jgi|Dappu1|232590|SNAP_00000648	jgi|Dappu1|309857|NCBI_GNO_0100389	>jgi|Dappu1|106945|fgenesh1_pg.C_scaffold_46000046	>jgi|Dappu1|314729|NCBI_GNO_1200153
>jgi|Dappu1|101174|fgenesh1_pg.C_scaffold_17000125	>jgi|Dappu1|309961|NCBI_GNO_0100494	jgi|Dappu1|309860|NCBI_GNO_0100392	>jgi|Dappu1|106986|fgenesh1_pg.C_scaffold_46000087	>jgi|Dappu1|238755|SNAP_00006813
>jgi|Dappu1|101178|fgenesh1_pg.C_scaffold_17000129	>jgi|Dappu1|94425|fgenesh1_pg.C_scaffold_1000536	jgi|Dappu1|232470|SNAP_00000528	>jgi|Dappu1|107078|fgenesh1_pg.C_scaffold_47000020	>jgi|Dappu1|222961|estExt_fgenesh1_pg.C_120188
>jgi|Dappu1|101184|fgenesh1_pg.C_scaffold_17000135	>jgi|Dappu1|94427|fgenesh1_pg.C_scaffold_1000538	jgi|Dappu1|309869|NCBI_GNO_0100401	>jgi|Dappu1|107086|fgenesh1_pg.C_scaffold_47000028	>jgi|Dappu1|230613|estExt_fgenesh1_kg.C_120027
>jgi|Dappu1|101187|fgenesh1_pg.C_scaffold_17000138	>jgi|Dappu1|309965|NCBI_GNO_0100498	jgi|Dappu1|220171|estExt_fgenesh1_pg.C_10430	>jgi|Dappu1|107104|fgenesh1_pg.C_scaffold_47000046	>jgi|Dappu1|301127|PASA_GEN_1200058
>jgi|Dappu1|101194|fgenesh1_pg.C_scaffold_17000145	>jgi|Dappu1|232612|SNAP_00000670	jgi|Dappu1|309890|NCBI_GNO_0100422	>jgi|Dappu1|107323|fgenesh1_pg.C_scaffold_49000005	>jgi|Dappu1|99605|fgenesh1_pg.C_scaffold_12000214
>jgi|Dappu1|101201|fgenesh1_pg.C_scaffold_17000152	>jgi|Dappu1|190285|estExt_Genewise1Plus.C_10759	jgi|Dappu1|94343|fgenesh1_pg.C_scaffold_1000454	>jgi|Dappu1|107382|fgenesh1_pg.C_scaffold_49000064	>jgi|Dappu1|99620|fgenesh1_pg.C_scaffold_12000229
>jgi|Dappu1|101223|fgenesh1_pg.C_scaffold_17000174	>jgi|Dappu1|220240|estExt_fgenesh1_pg.C_10548	jgi|Dappu1|309894|NCBI_GNO_0100426	>jgi|Dappu1|107425|fgenesh1_pg.C_scaffold_49000107	>jgi|Dappu1|314784|NCBI_GNO_1200209
>jgi|Dappu1|101239|fgenesh1_pg.C_scaffold_17000190	>jgi|Dappu1|309990|NCBI_GNO_0100523	jgi|Dappu1|309896|NCBI_GNO_0100428	>jgi|Dappu1|107456|fgenesh1_pg.C_scaffold_50000020	>jgi|Dappu1|222984|estExt_fgenesh1_pg.C_120239
>jgi|Dappu1|101266|fgenesh1_pg.C_scaffold_17000217	>jgi|Dappu1|232636|SNAP_00000694	jgi|Dappu1|94360|fgenesh1_pg.C_scaffold_1000471	>jgi|Dappu1|107470|fgenesh1_pg.C_scaffold_50000034	>jgi|Dappu1|314799|NCBI_GNO_1200224
>jgi|Dappu1|101276|fgenesh1_pg.C_scaffold_17000227	>jgi|Dappu1|232637|SNAP_00000695	jgi|Dappu1|220194|estExt_fgenesh1_pg.C_10469	>jgi|Dappu1|107482|fgenesh1_pg.C_scaffold_50000046	>jgi|Dappu1|238870|SNAP_00006928
>jgi|Dappu1|101277|fgenesh1_pg.C_scaffold_17000228	>jgi|Dappu1|94461|fgenesh1_pg.C_scaffold_1000572	jgi|Dappu1|94363|fgenesh1_pg.C_scaffold_1000474	>jgi|Dappu1|107524|fgenesh1_pg.C_scaffold_50000088	>jgi|Dappu1|238898|SNAP_00006956
>jgi|Dappu1|101278|fgenesh1_pg.C_scaffold_17000229	>jgi|Dappu1|94463|fgenesh1_pg.C_scaffold_1000574	jgi|Dappu1|94366|fgenesh1_pg.C_scaffold_1000477	>jgi|Dappu1|107527|fgenesh1_pg.C_scaffold_50000091	>jgi|Dappu1|314855|NCBI_GNO_1200280
>jgi|Dappu1|101295|fgenesh1_pg.C_scaffold_17000246	>jgi|Dappu1|232681|SNAP_00000739	jgi|Dappu1|309904|NCBI_GNO_0100436	>jgi|Dappu1|107622|fgenesh1_pg.C_scaffold_51000082	>jgi|Dappu1|314876|NCBI_GNO_1200301
>jgi|Dappu1|101309|fgenesh1_pg.C_scaffold_17000260	>jgi|Dappu1|310000|NCBI_GNO_0100533	jgi|Dappu1|232528|SNAP_00000586	>jgi|Dappu1|107626|fgenesh1_pg.C_scaffold_51000086	>jgi|Dappu1|314880|NCBI_GNO_1200305
>jgi|Dappu1|101321|fgenesh1_pg.C_scaffold_17000272	>jgi|Dappu1|232685|SNAP_00000743	jgi|Dappu1|220196|estExt_fgenesh1_pg.C_10475	>jgi|Dappu1|107642|fgenesh1_pg.C_scaffold_51000102	>jgi|Dappu1|314885|NCBI_GNO_1200310
>jgi|Dappu1|101359|fgenesh1_pg.C_scaffold_17000310	>jgi|Dappu1|299957|PASA_GEN_0100214	jgi|Dappu1|40094|e_gw1.1.988.1	>jgi|Dappu1|107647|fgenesh1_pg.C_scaffold_51000107	>jgi|Dappu1|314896|NCBI_GNO_1200321
>jgi|Dappu1|101360|fgenesh1_pg.C_scaffold_17000311	>jgi|Dappu1|232694|SNAP_00000752	jgi|Dappu1|300137|PASA_GEN_0100449	>jgi|Dappu1|107719|fgenesh1_pg.C_scaffold_52000030	>jgi|Dappu1|314923|NCBI_GNO_1200348
>jgi|Dappu1|101362|fgenesh1_pg.C_scaffold_17000313	>jgi|Dappu1|232695|SNAP_00000753	jgi|Dappu1|232534|SNAP_00000592	>jgi|Dappu1|107750|fgenesh1_pg.C_scaffold_52000061	>jgi|Dappu1|222058|estExt_fgenesh1_pg.C_80011
>jgi|Dappu1|101386|fgenesh1_pg.C_scaffold_17000337	>jgi|Dappu1|232697|SNAP_00000755	jgi|Dappu1|300138|PASA_GEN_0100450	>jgi|Dappu1|107760|fgenesh1_pg.C_scaffold_52000071	>jgi|Dappu1|313077|NCBI_GNO_0800025
>jgi|Dappu1|101389|fgenesh1_pg.C_scaffold_17000340	>jgi|Dappu1|232699|SNAP_00000757	jgi|Dappu1|220200|estExt_fgenesh1_pg.C_10482	>jgi|Dappu1|107780|fgenesh1_pg.C_scaffold_52000091	>jgi|Dappu1|222074|estExt_fgenesh1_pg.C_80033
>jgi|Dappu1|101429|fgenesh1_pg.C_scaffold_17000380	>jgi|Dappu1|299961|PASA_GEN_0100218	jgi|Dappu1|299926|PASA_GEN_0100172	>jgi|Dappu1|107786|fgenesh1_pg.C_scaffold_52000097	>jgi|Dappu1|230477|estExt_fgenesh1_kg.C_80003
>jgi|Dappu1|101431|fgenesh1_pg.C_scaffold_17000382	>jgi|Dappu1|94484|fgenesh1_pg.C_scaffold_1000595	jgi|Dappu1|299927|PASA_GEN_0100173	>jgi|Dappu1|107813|fgenesh1_pg.C_scaffold_52000124	>jgi|Dappu1|222080|estExt_fgenesh1_pg.C_80039
>jgi|Dappu1|101435|fgenesh1_pg.C_scaffold_17000386	>jgi|Dappu1|299971|PASA_GEN_0100229	jgi|Dappu1|220202|estExt_fgenesh1_pg.C_10484	>jgi|Dappu1|107964|fgenesh1_pg.C_scaffold_53000137	>jgi|Dappu1|222083|estExt_fgenesh1_pg.C_80042
>jgi|Dappu1|101455|fgenesh1_pg.C_scaffold_18000019	>jgi|Dappu1|232735|SNAP_00000793	jgi|Dappu1|309918|NCBI_GNO_0100450	>jgi|Dappu1|107984|fgenesh1_pg.C_scaffold_54000008	>jgi|Dappu1|236661|SNAP_00004719
>jgi|Dappu1|101457|fgenesh1_pg.C_scaffold_18000021	>jgi|Dappu1|232736|SNAP_00000794	jgi|Dappu1|299931|PASA_GEN_0100179	>jgi|Dappu1|107992|fgenesh1_pg.C_scaffold_54000016	>jgi|Dappu1|97873|fgenesh1_pg.C_scaffold_8000053
>jgi|Dappu1|101458|fgenesh1_pg.C_scaffold_18000022	>jgi|Dappu1|232737|SNAP_00000795	jgi|Dappu1|309923|NCBI_GNO_0100456	>jgi|Dappu1|108027|fgenesh1_pg.C_scaffold_54000051	>jgi|Dappu1|97874|fgenesh1_pg.C_scaffold_8000054
>jgi|Dappu1|101459|fgenesh1_pg.C_scaffold_18000023	>jgi|Dappu1|310045|NCBI_GNO_0100578	jgi|Dappu1|300142|PASA_GEN_0100454	>jgi|Dappu1|108042|fgenesh1_pg.C_scaffold_54000066	>jgi|Dappu1|97889|fgenesh1_pg.C_scaffold_8000069
>jgi|Dappu1|101461|fgenesh1_pg.C_scaffold_18000025	>jgi|Dappu1|310046|NCBI_GNO_0100579	jgi|Dappu1|299937|PASA_GEN_0100187	>jgi|Dappu1|108114|fgenesh1_pg.C_scaffold_55000001	>jgi|Dappu1|313115|NCBI_GNO_0800063
>jgi|Dappu1|101467|fgenesh1_pg.C_scaffold_18000031	>jgi|Dappu1|310047|NCBI_GNO_0100580	jgi|Dappu1|232555|SNAP_00000613	>jgi|Dappu1|108116|fgenesh1_pg.C_scaffold_55000003	>jgi|Dappu1|222112|estExt_fgenesh1_pg.C_80084
>jgi|Dappu1|101472|fgenesh1_pg.C_scaffold_18000036	>jgi|Dappu1|232746|SNAP_00000804	jgi|Dappu1|232579|SNAP_00000637	>jgi|Dappu1|108305|fgenesh1_pg.C_scaffold_56000081	>jgi|Dappu1|313127|NCBI_GNO_0800075
>jgi|Dappu1|101478|fgenesh1_pg.C_scaffold_18000042	>jgi|Dappu1|94522|fgenesh1_pg.C_scaffold_1000633	jgi|Dappu1|309949|NCBI_GNO_0100482	>jgi|Dappu1|108347|fgenesh1_pg.C_scaffold_57000027	>jgi|Dappu1|313174|NCBI_GNO_0800123
>jgi|Dappu1|101482|fgenesh1_pg.C_scaffold_18000046	>jgi|Dappu1|232754|SNAP_00000812	jgi|Dappu1|309950|NCBI_GNO_0100483	>jgi|Dappu1|108367|fgenesh1_pg.C_scaffold_57000047	>jgi|Dappu1|97978|fgenesh1_pg.C_scaffold_8000158
>jgi|Dappu1|101485|fgenesh1_pg.C_scaffold_18000049	>jgi|Dappu1|94529|fgenesh1_pg.C_scaffold_1000640	jgi|Dappu1|232590|SNAP_00000648	>jgi|Dappu1|108386|fgenesh1_pg.C_scaffold_57000066	>jgi|Dappu1|97997|fgenesh1_pg.C_scaffold_8000177
>jgi|Dappu1|101510|fgenesh1_pg.C_scaffold_18000074	>jgi|Dappu1|310058|NCBI_GNO_0100591	jgi|Dappu1|309961|NCBI_GNO_0100494	>jgi|Dappu1|108392|fgenesh1_pg.C_scaffold_57000072	>jgi|Dappu1|97998|fgenesh1_pg.C_scaffold_8000178
>jgi|Dappu1|101526|fgenesh1_pg.C_scaffold_18000090	>jgi|Dappu1|310068|NCBI_GNO_0100601	jgi|Dappu1|94425|fgenesh1_pg.C_scaffold_1000536	>jgi|Dappu1|108403|fgenesh1_pg.C_scaffold_57000083	>jgi|Dappu1|308473|PASA_GEN_0800130
>jgi|Dappu1|101532|fgenesh1_pg.C_scaffold_18000096	>jgi|Dappu1|235032|SNAP_00003090	jgi|Dappu1|94427|fgenesh1_pg.C_scaffold_1000538	>jgi|Dappu1|108484|fgenesh1_pg.C_scaffold_58000055	>jgi|Dappu1|98033|fgenesh1_pg.C_scaffold_8000213
>jgi|Dappu1|101535|fgenesh1_pg.C_scaffold_18000099	>jgi|Dappu1|311833|NCBI_GNO_0500001	jgi|Dappu1|309965|NCBI_GNO_0100498	>jgi|Dappu1|10851|gw1.67.38.1	>jgi|Dappu1|308489|PASA_GEN_0800152
>jgi|Dappu1|101537|fgenesh1_pg.C_scaffold_18000101	>jgi|Dappu1|235035|SNAP_00003093	jgi|Dappu1|232612|SNAP_00000670	>jgi|Dappu1|108556|fgenesh1_pg.C_scaffold_59000001	>jgi|Dappu1|208374|estExt_Genewise1.C_80308
>jgi|Dappu1|101545|fgenesh1_pg.C_scaffold_18000109	>jgi|Dappu1|306471|PASA_GEN_0500139	jgi|Dappu1|190285|estExt_Genewise1Plus.C_10759	>jgi|Dappu1|108646|fgenesh1_pg.C_scaffold_59000091	>jgi|Dappu1|308430|PASA_GEN_0800091
>jgi|Dappu1|101550|fgenesh1_pg.C_scaffold_18000114	>jgi|Dappu1|235046|SNAP_00003104	jgi|Dappu1|220240|estExt_fgenesh1_pg.C_10548	>jgi|Dappu1|108704|fgenesh1_pg.C_scaffold_60000057	>jgi|Dappu1|45102|e_gw1.8.583.1
>jgi|Dappu1|101571|fgenesh1_pg.C_scaffold_18000135	>jgi|Dappu1|306352|PASA_GEN_0500007	jgi|Dappu1|309990|NCBI_GNO_0100523	>jgi|Dappu1|108789|fgenesh1_pg.C_scaffold_60000142	>jgi|Dappu1|313278|NCBI_GNO_0800227
>jgi|Dappu1|101585|fgenesh1_pg.C_scaffold_18000149	>jgi|Dappu1|311860|NCBI_GNO_0500028	jgi|Dappu1|232636|SNAP_00000694	>jgi|Dappu1|108808|fgenesh1_pg.C_scaffold_61000019	>jgi|Dappu1|98101|fgenesh1_pg.C_scaffold_8000281
>jgi|Dappu1|101596|fgenesh1_pg.C_scaffold_18000160	>jgi|Dappu1|96539|fgenesh1_pg.C_scaffold_5000034	jgi|Dappu1|232637|SNAP_00000695	>jgi|Dappu1|109011|fgenesh1_pg.C_scaffold_62000027	>jgi|Dappu1|313302|NCBI_GNO_0800251
>jgi|Dappu1|101598|fgenesh1_pg.C_scaffold_18000162	>jgi|Dappu1|306358|PASA_GEN_0500013	jgi|Dappu1|94461|fgenesh1_pg.C_scaffold_1000572	>jgi|Dappu1|109112|fgenesh1_pg.C_scaffold_63000001	>jgi|Dappu1|308520|PASA_GEN_0800188
>jgi|Dappu1|101600|fgenesh1_pg.C_scaffold_18000164	>jgi|Dappu1|96544|fgenesh1_pg.C_scaffold_5000039	jgi|Dappu1|94463|fgenesh1_pg.C_scaffold_1000574	>jgi|Dappu1|109262|fgenesh1_pg.C_scaffold_64000016	>jgi|Dappu1|313331|NCBI_GNO_0800280
>jgi|Dappu1|101612|fgenesh1_pg.C_scaffold_18000176	>jgi|Dappu1|96545|fgenesh1_pg.C_scaffold_5000040	jgi|Dappu1|232681|SNAP_00000739	>jgi|Dappu1|109281|fgenesh1_pg.C_scaffold_64000035	>jgi|Dappu1|193379|estExt_Genewise1Plus.C_80471
>jgi|Dappu1|101618|fgenesh1_pg.C_scaffold_18000182	>jgi|Dappu1|96546|fgenesh1_pg.C_scaffold_5000041	jgi|Dappu1|310000|NCBI_GNO_0100533	>jgi|Dappu1|109322|fgenesh1_pg.C_scaffold_64000076	>jgi|Dappu1|313343|NCBI_GNO_0800292
>jgi|Dappu1|101620|fgenesh1_pg.C_scaffold_18000184	>jgi|Dappu1|311877|NCBI_GNO_0500045	jgi|Dappu1|232685|SNAP_00000743	>jgi|Dappu1|109390|fgenesh1_pg.C_scaffold_65000043	>jgi|Dappu1|308525|PASA_GEN_0800193
>jgi|Dappu1|101622|fgenesh1_pg.C_scaffold_18000186	>jgi|Dappu1|311880|NCBI_GNO_0500048	jgi|Dappu1|299957|PASA_GEN_0100214	>jgi|Dappu1|109394|fgenesh1_pg.C_scaffold_65000047	>jgi|Dappu1|313350|NCBI_GNO_0800299
>jgi|Dappu1|101631|fgenesh1_pg.C_scaffold_18000195	>jgi|Dappu1|311881|NCBI_GNO_0500049	jgi|Dappu1|232694|SNAP_00000752	>jgi|Dappu1|109417|fgenesh1_pg.C_scaffold_65000070	>jgi|Dappu1|308442|PASA_GEN_0800053
>jgi|Dappu1|101640|fgenesh1_pg.C_scaffold_18000204	>jgi|Dappu1|235084|SNAP_00003142	jgi|Dappu1|232695|SNAP_00000753	>jgi|Dappu1|109438|fgenesh1_pg.C_scaffold_65000091	>jgi|Dappu1|101856|fgenesh1_pg.C_scaffold_19000050
>jgi|Dappu1|101679|fgenesh1_pg.C_scaffold_18000243	>jgi|Dappu1|96554|fgenesh1_pg.C_scaffold_5000049	jgi|Dappu1|232697|SNAP_00000755	>jgi|Dappu1|109440|fgenesh1_pg.C_scaffold_65000093	>jgi|Dappu1|101871|fgenesh1_pg.C_scaffold_19000065
>jgi|Dappu1|101682|fgenesh1_pg.C_scaffold_18000246	>jgi|Dappu1|311888|NCBI_GNO_0500056	jgi|Dappu1|232699|SNAP_00000757	>jgi|Dappu1|109456|fgenesh1_pg.C_scaffold_66000003	>jgi|Dappu1|241679|SNAP_00009737
>jgi|Dappu1|101683|fgenesh1_pg.C_scaffold_18000247	>jgi|Dappu1|96564|fgenesh1_pg.C_scaffold_5000059	jgi|Dappu1|300167|PASA_GEN_0100488	>jgi|Dappu1|109466|fgenesh1_pg.C_scaffold_66000013	>jgi|Dappu1|317072|NCBI_GNO_1900069
>jgi|Dappu1|101684|fgenesh1_pg.C_scaffold_18000248	>jgi|Dappu1|230361|estExt_fgenesh1_kg.C_50005	jgi|Dappu1|299961|PASA_GEN_0100218	>jgi|Dappu1|109501|fgenesh1_pg.C_scaffold_66000048	>jgi|Dappu1|210865|estExt_Genewise1.C_190128
>jgi|Dappu1|101685|fgenesh1_pg.C_scaffold_18000249	>jgi|Dappu1|306370|PASA_GEN_0500025	jgi|Dappu1|94484|fgenesh1_pg.C_scaffold_1000595	>jgi|Dappu1|109504|fgenesh1_pg.C_scaffold_66000051	>jgi|Dappu1|317080|NCBI_GNO_1900077
>jgi|Dappu1|101700|fgenesh1_pg.C_scaffold_18000264	>jgi|Dappu1|221453|estExt_fgenesh1_pg.C_50070	jgi|Dappu1|299971|PASA_GEN_0100229	>jgi|Dappu1|109556|fgenesh1_pg.C_scaffold_66000103	>jgi|Dappu1|302864|PASA_GEN_1900122
>jgi|Dappu1|101710|fgenesh1_pg.C_scaffold_18000274	>jgi|Dappu1|311910|NCBI_GNO_0500078	jgi|Dappu1|230130|estExt_fgenesh1_kg.C_10071	>jgi|Dappu1|109566|fgenesh1_pg.C_scaffold_66000113	>jgi|Dappu1|302806|PASA_GEN_1900044
>jgi|Dappu1|101723|fgenesh1_pg.C_scaffold_18000287	>jgi|Dappu1|96584|fgenesh1_pg.C_scaffold_5000079	jgi|Dappu1|232735|SNAP_00000793	>jgi|Dappu1|109586|fgenesh1_pg.C_scaffold_67000004	>jgi|Dappu1|36719|gw1.19.362.1
>jgi|Dappu1|101737|fgenesh1_pg.C_scaffold_18000301	>jgi|Dappu1|311915|NCBI_GNO_0500083	jgi|Dappu1|232736|SNAP_00000794	>jgi|Dappu1|109621|fgenesh1_pg.C_scaffold_67000039	>jgi|Dappu1|49418|e_gw1.19.335.1
>jgi|Dappu1|101743|fgenesh1_pg.C_scaffold_18000307	>jgi|Dappu1|235137|SNAP_00003195	jgi|Dappu1|232737|SNAP_00000795	>jgi|Dappu1|109662|fgenesh1_pg.C_scaffold_67000080	>jgi|Dappu1|317161|NCBI_GNO_1900160
>jgi|Dappu1|101766|fgenesh1_pg.C_scaffold_18000330	>jgi|Dappu1|235145|SNAP_00003203	jgi|Dappu1|310045|NCBI_GNO_0100578	>jgi|Dappu1|109720|fgenesh1_pg.C_scaffold_67000138	>jgi|Dappu1|308942|PASA_GEN_8900036
>jgi|Dappu1|101790|fgenesh1_pg.C_scaffold_18000354	>jgi|Dappu1|311923|NCBI_GNO_0500091	jgi|Dappu1|310046|NCBI_GNO_0100579	>jgi|Dappu1|109767|fgenesh1_pg.C_scaffold_68000037	>jgi|Dappu1|308952|PASA_GEN_8900048
>jgi|Dappu1|101797|fgenesh1_pg.C_scaffold_18000361	>jgi|Dappu1|306374|PASA_GEN_0500029	jgi|Dappu1|310047|NCBI_GNO_0100580	>jgi|Dappu1|109794|fgenesh1_pg.C_scaffold_68000064	>jgi|Dappu1|308930|PASA_GEN_8900024
>jgi|Dappu1|101805|fgenesh1_pg.C_scaffold_18000369	>jgi|Dappu1|96598|fgenesh1_pg.C_scaffold_5000093	jgi|Dappu1|232746|SNAP_00000804	>jgi|Dappu1|109808|fgenesh1_pg.C_scaffold_69000003	>jgi|Dappu1|247689|SNAP_00015747
>jgi|Dappu1|101812|fgenesh1_pg.C_scaffold_19000006	>jgi|Dappu1|221468|estExt_fgenesh1_pg.C_50096	jgi|Dappu1|94521|fgenesh1_pg.C_scaffold_1000632	>jgi|Dappu1|109812|fgenesh1_pg.C_scaffold_69000007	>jgi|Dappu1|247707|SNAP_00015765
>jgi|Dappu1|101847|fgenesh1_pg.C_scaffold_19000041	>jgi|Dappu1|311931|NCBI_GNO_0500100	jgi|Dappu1|94522|fgenesh1_pg.C_scaffold_1000633	>jgi|Dappu1|109842|fgenesh1_pg.C_scaffold_69000037	>jgi|Dappu1|247766|SNAP_00015824
>jgi|Dappu1|101866|fgenesh1_pg.C_scaffold_19000060	>jgi|Dappu1|311934|NCBI_GNO_0500103	jgi|Dappu1|232754|SNAP_00000812	>jgi|Dappu1|109849|fgenesh1_pg.C_scaffold_69000044	>jgi|Dappu1|321514|NCBI_GNO_4100069
>jgi|Dappu1|101922|fgenesh1_pg.C_scaffold_19000116	>jgi|Dappu1|96607|fgenesh1_pg.C_scaffold_5000102	jgi|Dappu1|94529|fgenesh1_pg.C_scaffold_1000640	>jgi|Dappu1|109856|fgenesh1_pg.C_scaffold_69000051	>jgi|Dappu1|321532|NCBI_GNO_4100087
>jgi|Dappu1|101930|fgenesh1_pg.C_scaffold_19000124	>jgi|Dappu1|96608|fgenesh1_pg.C_scaffold_5000103	jgi|Dappu1|310058|NCBI_GNO_0100591	>jgi|Dappu1|109945|fgenesh1_pg.C_scaffold_70000053	>jgi|Dappu1|106250|fgenesh1_pg.C_scaffold_41000095
>jgi|Dappu1|101933|fgenesh1_pg.C_scaffold_19000127	>jgi|Dappu1|306499|PASA_GEN_0500177	jgi|Dappu1|310068|NCBI_GNO_0100601	>jgi|Dappu1|109951|fgenesh1_pg.C_scaffold_70000059	>jgi|Dappu1|247893|SNAP_00015951
>jgi|Dappu1|101955|fgenesh1_pg.C_scaffold_19000149	>jgi|Dappu1|306500|PASA_GEN_0500179	jgi|Dappu1|235032|SNAP_00003090	>jgi|Dappu1|109971|fgenesh1_pg.C_scaffold_70000079	>jgi|Dappu1|106275|fgenesh1_pg.C_scaffold_41000120
>jgi|Dappu1|101959|fgenesh1_pg.C_scaffold_19000153	>jgi|Dappu1|306383|PASA_GEN_0500038	jgi|Dappu1|311833|NCBI_GNO_0500001	>jgi|Dappu1|110008|fgenesh1_pg.C_scaffold_70000116	>jgi|Dappu1|106277|fgenesh1_pg.C_scaffold_41000122
>jgi|Dappu1|101971|fgenesh1_pg.C_scaffold_19000165	>jgi|Dappu1|306501|PASA_GEN_0500180	jgi|Dappu1|235035|SNAP_00003093	>jgi|Dappu1|110014|fgenesh1_pg.C_scaffold_70000122	>jgi|Dappu1|106278|fgenesh1_pg.C_scaffold_41000123
>jgi|Dappu1|101991|fgenesh1_pg.C_scaffold_19000185	>jgi|Dappu1|96617|fgenesh1_pg.C_scaffold_5000112	jgi|Dappu1|37015|gw1.5.646.1	>jgi|Dappu1|110022|fgenesh1_pg.C_scaffold_70000130	>jgi|Dappu1|247952|SNAP_00016010
>jgi|Dappu1|102025|fgenesh1_pg.C_scaffold_19000219	>jgi|Dappu1|235178|SNAP_00003236	jgi|Dappu1|43185|e_gw1.5.582.1	>jgi|Dappu1|110024|fgenesh1_pg.C_scaffold_70000132	>jgi|Dappu1|225734|estExt_fgenesh1_pg.C_410127
>jgi|Dappu1|102041|fgenesh1_pg.C_scaffold_19000235	>jgi|Dappu1|96619|fgenesh1_pg.C_scaffold_5000114	jgi|Dappu1|306471|PASA_GEN_0500139	>jgi|Dappu1|110060|fgenesh1_pg.C_scaffold_71000001	>jgi|Dappu1|229597|estExt_fgenesh1_pg.C_2180009
>jgi|Dappu1|102042|fgenesh1_pg.C_scaffold_19000236	>jgi|Dappu1|96622|fgenesh1_pg.C_scaffold_5000117	jgi|Dappu1|235046|SNAP_00003104	>jgi|Dappu1|110065|fgenesh1_pg.C_scaffold_71000006	>jgi|Dappu1|323946|NCBI_GNO_5800035
>jgi|Dappu1|102043|fgenesh1_pg.C_scaffold_19000237	>jgi|Dappu1|96630|fgenesh1_pg.C_scaffold_5000125	jgi|Dappu1|306352|PASA_GEN_0500007	>jgi|Dappu1|110093|fgenesh1_pg.C_scaffold_71000034	>jgi|Dappu1|306976|PASA_GEN_5800032
>jgi|Dappu1|102047|fgenesh1_pg.C_scaffold_20000002	>jgi|Dappu1|235192|SNAP_00003250	jgi|Dappu1|311860|NCBI_GNO_0500028	>jgi|Dappu1|110130|fgenesh1_pg.C_scaffold_71000071	>jgi|Dappu1|56646|e_gw1.58.35.1
>jgi|Dappu1|102053|fgenesh1_pg.C_scaffold_20000008	>jgi|Dappu1|311961|NCBI_GNO_0500130	jgi|Dappu1|96539|fgenesh1_pg.C_scaffold_5000034	>jgi|Dappu1|110140|fgenesh1_pg.C_scaffold_72000007	>jgi|Dappu1|56655|e_gw1.58.30.1
>jgi|Dappu1|102055|fgenesh1_pg.C_scaffold_20000010	>jgi|Dappu1|235195|SNAP_00003253	jgi|Dappu1|306358|PASA_GEN_0500013	>jgi|Dappu1|110141|fgenesh1_pg.C_scaffold_72000008	>jgi|Dappu1|306993|PASA_GEN_5800050
>jgi|Dappu1|102056|fgenesh1_pg.C_scaffold_20000011	>jgi|Dappu1|306391|PASA_GEN_0500046	jgi|Dappu1|96544|fgenesh1_pg.C_scaffold_5000039	>jgi|Dappu1|110154|fgenesh1_pg.C_scaffold_72000021	>jgi|Dappu1|304464|PASA_GEN_2900064
>jgi|Dappu1|102058|fgenesh1_pg.C_scaffold_20000013	>jgi|Dappu1|8650|gw1.5.131.1	jgi|Dappu1|96545|fgenesh1_pg.C_scaffold_5000040	>jgi|Dappu1|110156|fgenesh1_pg.C_scaffold_72000023	>jgi|Dappu1|244605|SNAP_00012663
>jgi|Dappu1|102059|fgenesh1_pg.C_scaffold_20000014	>jgi|Dappu1|306392|PASA_GEN_0500047	jgi|Dappu1|96546|fgenesh1_pg.C_scaffold_5000041	>jgi|Dappu1|110187|fgenesh1_pg.C_scaffold_72000054	>jgi|Dappu1|5603|gw1.29.58.1
>jgi|Dappu1|102061|fgenesh1_pg.C_scaffold_20000016	>jgi|Dappu1|235202|SNAP_00003260	jgi|Dappu1|311877|NCBI_GNO_0500045	>jgi|Dappu1|110191|fgenesh1_pg.C_scaffold_72000058	>jgi|Dappu1|244609|SNAP_00012667
>jgi|Dappu1|102071|fgenesh1_pg.C_scaffold_20000026	>jgi|Dappu1|235205|SNAP_00003263	jgi|Dappu1|311880|NCBI_GNO_0500048	>jgi|Dappu1|110195|fgenesh1_pg.C_scaffold_72000062	>jgi|Dappu1|244611|SNAP_00012669
>jgi|Dappu1|102073|fgenesh1_pg.C_scaffold_20000028	>jgi|Dappu1|235210|SNAP_00003268	jgi|Dappu1|311881|NCBI_GNO_0500049	>jgi|Dappu1|110200|fgenesh1_pg.C_scaffold_72000067	>jgi|Dappu1|104146|fgenesh1_pg.C_scaffold_29000025
>jgi|Dappu1|102075|fgenesh1_pg.C_scaffold_20000030	>jgi|Dappu1|96648|fgenesh1_pg.C_scaffold_5000143	jgi|Dappu1|311882|NCBI_GNO_0500050	>jgi|Dappu1|110202|fgenesh1_pg.C_scaffold_72000069	>jgi|Dappu1|304469|PASA_GEN_2900069
>jgi|Dappu1|102081|fgenesh1_pg.C_scaffold_20000036	>jgi|Dappu1|306514|PASA_GEN_0500198	jgi|Dappu1|235084|SNAP_00003142	>jgi|Dappu1|110246|fgenesh1_pg.C_scaffold_72000113	>jgi|Dappu1|104156|fgenesh1_pg.C_scaffold_29000035
>jgi|Dappu1|102083|fgenesh1_pg.C_scaffold_20000038	>jgi|Dappu1|235227|SNAP_00003285	jgi|Dappu1|96554|fgenesh1_pg.C_scaffold_5000049	>jgi|Dappu1|110393|fgenesh1_pg.C_scaffold_74000031	>jgi|Dappu1|244645|SNAP_00012703
>jgi|Dappu1|102084|fgenesh1_pg.C_scaffold_20000039	>jgi|Dappu1|311990|NCBI_GNO_0500159	jgi|Dappu1|311888|NCBI_GNO_0500056	>jgi|Dappu1|110436|fgenesh1_pg.C_scaffold_75000001	>jgi|Dappu1|104168|fgenesh1_pg.C_scaffold_29000047
>jgi|Dappu1|102088|fgenesh1_pg.C_scaffold_20000043	>jgi|Dappu1|306398|PASA_GEN_0500055	jgi|Dappu1|96564|fgenesh1_pg.C_scaffold_5000059	>jgi|Dappu1|110456|fgenesh1_pg.C_scaffold_75000021	>jgi|Dappu1|244689|SNAP_00012747
>jgi|Dappu1|102093|fgenesh1_pg.C_scaffold_20000048	>jgi|Dappu1|311991|NCBI_GNO_0500160	jgi|Dappu1|306485|PASA_GEN_0500158	>jgi|Dappu1|110605|fgenesh1_pg.C_scaffold_76000049	>jgi|Dappu1|304479|PASA_GEN_2900082
>jgi|Dappu1|102105|fgenesh1_pg.C_scaffold_20000060	>jgi|Dappu1|96666|fgenesh1_pg.C_scaffold_5000161	jgi|Dappu1|230361|estExt_fgenesh1_kg.C_50005	>jgi|Dappu1|110680|fgenesh1_pg.C_scaffold_77000009	>jgi|Dappu1|244701|SNAP_00012759
>jgi|Dappu1|102106|fgenesh1_pg.C_scaffold_20000061	>jgi|Dappu1|306399|PASA_GEN_0500056	jgi|Dappu1|311898|NCBI_GNO_0500066	>jgi|Dappu1|110772|fgenesh1_pg.C_scaffold_77000101	>jgi|Dappu1|304485|PASA_GEN_2900088
>jgi|Dappu1|102133|fgenesh1_pg.C_scaffold_20000088	>jgi|Dappu1|312000|NCBI_GNO_0500169	jgi|Dappu1|311899|NCBI_GNO_0500067	>jgi|Dappu1|110773|fgenesh1_pg.C_scaffold_77000102	>jgi|Dappu1|319400|NCBI_GNO_2900099
>jgi|Dappu1|102173|fgenesh1_pg.C_scaffold_20000128	>jgi|Dappu1|96671|fgenesh1_pg.C_scaffold_5000166	jgi|Dappu1|311900|NCBI_GNO_0500068	>jgi|Dappu1|110779|fgenesh1_pg.C_scaffold_77000108	>jgi|Dappu1|244713|SNAP_00012771
>jgi|Dappu1|102195|fgenesh1_pg.C_scaffold_20000150	>jgi|Dappu1|96672|fgenesh1_pg.C_scaffold_5000167	jgi|Dappu1|306369|PASA_GEN_0500024	>jgi|Dappu1|110876|fgenesh1_pg.C_scaffold_78000096	>jgi|Dappu1|319423|NCBI_GNO_2900122
>jgi|Dappu1|102209|fgenesh1_pg.C_scaffold_20000164	>jgi|Dappu1|96684|fgenesh1_pg.C_scaffold_5000179	jgi|Dappu1|306370|PASA_GEN_0500025	>jgi|Dappu1|110877|fgenesh1_pg.C_scaffold_78000097	>jgi|Dappu1|212447|estExt_Genewise1.C_290148
>jgi|Dappu1|102226|fgenesh1_pg.C_scaffold_20000181	>jgi|Dappu1|96685|fgenesh1_pg.C_scaffold_5000180	jgi|Dappu1|221453|estExt_fgenesh1_pg.C_50070	>jgi|Dappu1|110892|fgenesh1_pg.C_scaffold_79000005	>jgi|Dappu1|225033|estExt_fgenesh1_pg.C_290125
>jgi|Dappu1|102257|fgenesh1_pg.C_scaffold_20000212	>jgi|Dappu1|306406|PASA_GEN_0500063	jgi|Dappu1|311910|NCBI_GNO_0500078	>jgi|Dappu1|110913|fgenesh1_pg.C_scaffold_79000026	>jgi|Dappu1|244756|SNAP_00012814
>jgi|Dappu1|102258|fgenesh1_pg.C_scaffold_20000213	>jgi|Dappu1|235259|SNAP_00003317	jgi|Dappu1|96584|fgenesh1_pg.C_scaffold_5000079	>jgi|Dappu1|110932|fgenesh1_pg.C_scaffold_79000045	>jgi|Dappu1|319453|NCBI_GNO_2900152
>jgi|Dappu1|102273|fgenesh1_pg.C_scaffold_20000228	>jgi|Dappu1|306407|PASA_GEN_0500064	jgi|Dappu1|306491|PASA_GEN_0500166	>jgi|Dappu1|111092|fgenesh1_pg.C_scaffold_80000093	>jgi|Dappu1|52309|e_gw1.29.313.1
>jgi|Dappu1|102281|fgenesh1_pg.C_scaffold_20000236	>jgi|Dappu1|96691|fgenesh1_pg.C_scaffold_5000186	jgi|Dappu1|311915|NCBI_GNO_0500083	>jgi|Dappu1|111096|fgenesh1_pg.C_scaffold_80000097	>jgi|Dappu1|304503|PASA_GEN_2900112
>jgi|Dappu1|102309|fgenesh1_pg.C_scaffold_21000021	>jgi|Dappu1|312026|NCBI_GNO_0500195	jgi|Dappu1|235137|SNAP_00003195	>jgi|Dappu1|111100|fgenesh1_pg.C_scaffold_80000101	>jgi|Dappu1|244780|SNAP_00012838
>jgi|Dappu1|102310|fgenesh1_pg.C_scaffold_21000022	>jgi|Dappu1|312027|NCBI_GNO_0500196	jgi|Dappu1|235145|SNAP_00003203	>jgi|Dappu1|111113|fgenesh1_pg.C_scaffold_81000012	>jgi|Dappu1|304504|PASA_GEN_2900114
>jgi|Dappu1|102311|fgenesh1_pg.C_scaffold_21000023	>jgi|Dappu1|312031|NCBI_GNO_0500200	jgi|Dappu1|311923|NCBI_GNO_0500091	>jgi|Dappu1|111119|fgenesh1_pg.C_scaffold_81000018	>jgi|Dappu1|319466|NCBI_GNO_2900165
>jgi|Dappu1|102312|fgenesh1_pg.C_scaffold_21000024	>jgi|Dappu1|235273|SNAP_00003331	jgi|Dappu1|306374|PASA_GEN_0500029	>jgi|Dappu1|111147|fgenesh1_pg.C_scaffold_81000046	>jgi|Dappu1|104306|fgenesh1_pg.C_scaffold_29000185
>jgi|Dappu1|102315|fgenesh1_pg.C_scaffold_21000027	>jgi|Dappu1|312034|NCBI_GNO_0500203	jgi|Dappu1|96598|fgenesh1_pg.C_scaffold_5000093	>jgi|Dappu1|111150|fgenesh1_pg.C_scaffold_81000049	>jgi|Dappu1|104316|fgenesh1_pg.C_scaffold_29000195
>jgi|Dappu1|102316|fgenesh1_pg.C_scaffold_21000028	>jgi|Dappu1|312035|NCBI_GNO_0500204	jgi|Dappu1|221468|estExt_fgenesh1_pg.C_50096	>jgi|Dappu1|111170|fgenesh1_pg.C_scaffold_82000002	>jgi|Dappu1|244808|SNAP_00012866
>jgi|Dappu1|102317|fgenesh1_pg.C_scaffold_21000029	>jgi|Dappu1|96699|fgenesh1_pg.C_scaffold_5000194	jgi|Dappu1|311931|NCBI_GNO_0500100	>jgi|Dappu1|111178|fgenesh1_pg.C_scaffold_82000010	>jgi|Dappu1|231024|estExt_fgenesh1_kg.C_290015
>jgi|Dappu1|102318|fgenesh1_pg.C_scaffold_21000030	>jgi|Dappu1|96700|fgenesh1_pg.C_scaffold_5000195	jgi|Dappu1|311934|NCBI_GNO_0500103	>jgi|Dappu1|111184|fgenesh1_pg.C_scaffold_82000016	>jgi|Dappu1|319502|NCBI_GNO_2900201
>jgi|Dappu1|102323|fgenesh1_pg.C_scaffold_21000035	>jgi|Dappu1|96706|fgenesh1_pg.C_scaffold_5000201	jgi|Dappu1|96607|fgenesh1_pg.C_scaffold_5000102	>jgi|Dappu1|111185|fgenesh1_pg.C_scaffold_82000017	>jgi|Dappu1|319503|NCBI_GNO_2900202
>jgi|Dappu1|102324|fgenesh1_pg.C_scaffold_21000036	>jgi|Dappu1|235302|SNAP_00003360	jgi|Dappu1|96608|fgenesh1_pg.C_scaffold_5000103	>jgi|Dappu1|111195|fgenesh1_pg.C_scaffold_82000027	>jgi|Dappu1|319504|NCBI_GNO_2900203
>jgi|Dappu1|102325|fgenesh1_pg.C_scaffold_21000037	>jgi|Dappu1|306537|PASA_GEN_0500224	jgi|Dappu1|306499|PASA_GEN_0500177	>jgi|Dappu1|111204|fgenesh1_pg.C_scaffold_82000036	>jgi|Dappu1|319518|NCBI_GNO_2900217
>jgi|Dappu1|102327|fgenesh1_pg.C_scaffold_21000039	>jgi|Dappu1|235306|SNAP_00003364	jgi|Dappu1|306500|PASA_GEN_0500179	>jgi|Dappu1|111503|fgenesh1_pg.C_scaffold_86000050	>jgi|Dappu1|310076|NCBI_GNO_0200008
>jgi|Dappu1|102328|fgenesh1_pg.C_scaffold_21000040	>jgi|Dappu1|96721|fgenesh1_pg.C_scaffold_5000216	jgi|Dappu1|306383|PASA_GEN_0500038	>jgi|Dappu1|111566|fgenesh1_pg.C_scaffold_86000113	>jgi|Dappu1|190410|estExt_Genewise1Plus.C_20012
>jgi|Dappu1|102331|fgenesh1_pg.C_scaffold_21000043	>jgi|Dappu1|306541|PASA_GEN_0500228	jgi|Dappu1|306501|PASA_GEN_0500180	>jgi|Dappu1|111599|fgenesh1_pg.C_scaffold_87000031	>jgi|Dappu1|302953|PASA_GEN_0200012
>jgi|Dappu1|102339|fgenesh1_pg.C_scaffold_21000051	>jgi|Dappu1|306542|PASA_GEN_0500229	jgi|Dappu1|221477|estExt_fgenesh1_pg.C_50109	>jgi|Dappu1|111600|fgenesh1_pg.C_scaffold_87000032	>jgi|Dappu1|310102|NCBI_GNO_0200034
>jgi|Dappu1|102345|fgenesh1_pg.C_scaffold_21000057	>jgi|Dappu1|312063|NCBI_GNO_0500232	jgi|Dappu1|306502|PASA_GEN_0500182	>jgi|Dappu1|111605|fgenesh1_pg.C_scaffold_87000037	>jgi|Dappu1|303102|PASA_GEN_0200186
>jgi|Dappu1|102351|fgenesh1_pg.C_scaffold_21000063	>jgi|Dappu1|221551|estExt_fgenesh1_pg.C_50240	jgi|Dappu1|96617|fgenesh1_pg.C_scaffold_5000112	>jgi|Dappu1|111606|fgenesh1_pg.C_scaffold_87000038	>jgi|Dappu1|220332|estExt_fgenesh1_pg.C_20057
>jgi|Dappu1|102352|fgenesh1_pg.C_scaffold_21000064	>jgi|Dappu1|306419|PASA_GEN_0500077	jgi|Dappu1|235178|SNAP_00003236	>jgi|Dappu1|111607|fgenesh1_pg.C_scaffold_87000039	>jgi|Dappu1|310126|NCBI_GNO_0200058
>jgi|Dappu1|102362|fgenesh1_pg.C_scaffold_21000074	>jgi|Dappu1|235345|SNAP_00003403	jgi|Dappu1|96619|fgenesh1_pg.C_scaffold_5000114	>jgi|Dappu1|111641|fgenesh1_pg.C_scaffold_87000073	>jgi|Dappu1|310134|NCBI_GNO_0200066
>jgi|Dappu1|102363|fgenesh1_pg.C_scaffold_21000075	>jgi|Dappu1|235346|SNAP_00003404	jgi|Dappu1|311952|NCBI_GNO_0500121	>jgi|Dappu1|111732|fgenesh1_pg.C_scaffold_88000004	>jgi|Dappu1|32451|gw1.2.794.1
>jgi|Dappu1|102364|fgenesh1_pg.C_scaffold_21000076	>jgi|Dappu1|96748|fgenesh1_pg.C_scaffold_5000243	jgi|Dappu1|96622|fgenesh1_pg.C_scaffold_5000117	>jgi|Dappu1|111787|fgenesh1_pg.C_scaffold_88000059	>jgi|Dappu1|94673|fgenesh1_pg.C_scaffold_2000130
>jgi|Dappu1|102366|fgenesh1_pg.C_scaffold_21000078	>jgi|Dappu1|306549|PASA_GEN_0500241	jgi|Dappu1|306386|PASA_GEN_0500041	>jgi|Dappu1|111959|fgenesh1_pg.C_scaffold_90000047	>jgi|Dappu1|303118|PASA_GEN_0200208
>jgi|Dappu1|102386|fgenesh1_pg.C_scaffold_21000098	>jgi|Dappu1|96760|fgenesh1_pg.C_scaffold_5000255	jgi|Dappu1|96630|fgenesh1_pg.C_scaffold_5000125	>jgi|Dappu1|112030|fgenesh1_pg.C_scaffold_91000010	>jgi|Dappu1|310235|NCBI_GNO_0200170
>jgi|Dappu1|102387|fgenesh1_pg.C_scaffold_21000099	>jgi|Dappu1|96762|fgenesh1_pg.C_scaffold_5000257	jgi|Dappu1|235192|SNAP_00003250	>jgi|Dappu1|112037|fgenesh1_pg.C_scaffold_91000017	>jgi|Dappu1|94746|fgenesh1_pg.C_scaffold_2000203
>jgi|Dappu1|102388|fgenesh1_pg.C_scaffold_21000100	>jgi|Dappu1|96763|fgenesh1_pg.C_scaffold_5000258	jgi|Dappu1|311961|NCBI_GNO_0500130	>jgi|Dappu1|112057|fgenesh1_pg.C_scaffold_91000037	>jgi|Dappu1|310241|NCBI_GNO_0200176
>jgi|Dappu1|102448|fgenesh1_pg.C_scaffold_21000160	>jgi|Dappu1|235363|SNAP_00003421	jgi|Dappu1|235195|SNAP_00003253	>jgi|Dappu1|112080|fgenesh1_pg.C_scaffold_91000060	>jgi|Dappu1|220418|estExt_fgenesh1_pg.C_20213
>jgi|Dappu1|102459|fgenesh1_pg.C_scaffold_21000171	>jgi|Dappu1|235368|SNAP_00003426	jgi|Dappu1|306391|PASA_GEN_0500046	>jgi|Dappu1|112081|fgenesh1_pg.C_scaffold_91000061	>jgi|Dappu1|94765|fgenesh1_pg.C_scaffold_2000222
>jgi|Dappu1|102473|fgenesh1_pg.C_scaffold_21000185	>jgi|Dappu1|312102|NCBI_GNO_0500271	jgi|Dappu1|8650|gw1.5.131.1	>jgi|Dappu1|112094|fgenesh1_pg.C_scaffold_91000074	>jgi|Dappu1|220428|estExt_fgenesh1_pg.C_20230
>jgi|Dappu1|102481|fgenesh1_pg.C_scaffold_21000193	>jgi|Dappu1|235381|SNAP_00003439	jgi|Dappu1|96634|fgenesh1_pg.C_scaffold_5000129	>jgi|Dappu1|112135|fgenesh1_pg.C_scaffold_92000016	>jgi|Dappu1|310294|NCBI_GNO_0200231
>jgi|Dappu1|102482|fgenesh1_pg.C_scaffold_21000194	>jgi|Dappu1|96782|fgenesh1_pg.C_scaffold_5000277	jgi|Dappu1|306392|PASA_GEN_0500047	>jgi|Dappu1|112137|fgenesh1_pg.C_scaffold_92000018	>jgi|Dappu1|94817|fgenesh1_pg.C_scaffold_2000274
>jgi|Dappu1|102489|fgenesh1_pg.C_scaffold_21000201	>jgi|Dappu1|312106|NCBI_GNO_0500275	jgi|Dappu1|235202|SNAP_00003260	>jgi|Dappu1|112151|fgenesh1_pg.C_scaffold_92000032	>jgi|Dappu1|310315|NCBI_GNO_0200252
>jgi|Dappu1|102493|fgenesh1_pg.C_scaffold_21000205	>jgi|Dappu1|235385|SNAP_00003443	jgi|Dappu1|235205|SNAP_00003263	>jgi|Dappu1|112153|fgenesh1_pg.C_scaffold_92000034	>jgi|Dappu1|220496|estExt_fgenesh1_pg.C_20348
>jgi|Dappu1|102497|fgenesh1_pg.C_scaffold_21000209	>jgi|Dappu1|306427|PASA_GEN_0500086	jgi|Dappu1|235210|SNAP_00003268	>jgi|Dappu1|112166|fgenesh1_pg.C_scaffold_92000047	>jgi|Dappu1|220504|estExt_fgenesh1_pg.C_20367
>jgi|Dappu1|102499|fgenesh1_pg.C_scaffold_21000211	>jgi|Dappu1|207468|estExt_Genewise1.C_50431	jgi|Dappu1|96648|fgenesh1_pg.C_scaffold_5000143	>jgi|Dappu1|112167|fgenesh1_pg.C_scaffold_92000048	>jgi|Dappu1|310414|NCBI_GNO_0200352
>jgi|Dappu1|102531|fgenesh1_pg.C_scaffold_21000243	>jgi|Dappu1|312122|NCBI_GNO_0500292	jgi|Dappu1|306514|PASA_GEN_0500198	>jgi|Dappu1|112181|fgenesh1_pg.C_scaffold_92000062	>jgi|Dappu1|233239|SNAP_00001297
>jgi|Dappu1|102532|fgenesh1_pg.C_scaffold_21000244	>jgi|Dappu1|207481|estExt_Genewise1.C_50447	jgi|Dappu1|235227|SNAP_00003285	>jgi|Dappu1|112183|fgenesh1_pg.C_scaffold_92000064	>jgi|Dappu1|310443|NCBI_GNO_0200382
>jgi|Dappu1|102543|fgenesh1_pg.C_scaffold_21000255	>jgi|Dappu1|235407|SNAP_00003465	jgi|Dappu1|311990|NCBI_GNO_0500159	>jgi|Dappu1|112195|fgenesh1_pg.C_scaffold_93000009	>jgi|Dappu1|94999|fgenesh1_pg.C_scaffold_2000456
>jgi|Dappu1|102586|fgenesh1_pg.C_scaffold_22000009	>jgi|Dappu1|306438|PASA_GEN_0500102	jgi|Dappu1|306398|PASA_GEN_0500055	>jgi|Dappu1|112337|fgenesh1_pg.C_scaffold_95000005	>jgi|Dappu1|95016|fgenesh1_pg.C_scaffold_2000473
>jgi|Dappu1|102589|fgenesh1_pg.C_scaffold_22000012	>jgi|Dappu1|96826|fgenesh1_pg.C_scaffold_5000321	jgi|Dappu1|311991|NCBI_GNO_0500160	>jgi|Dappu1|112421|fgenesh1_pg.C_scaffold_96000021	>jgi|Dappu1|233314|SNAP_00001372
>jgi|Dappu1|102590|fgenesh1_pg.C_scaffold_22000013	>jgi|Dappu1|235425|SNAP_00003483	jgi|Dappu1|96666|fgenesh1_pg.C_scaffold_5000161	>jgi|Dappu1|112424|fgenesh1_pg.C_scaffold_96000024	>jgi|Dappu1|303041|PASA_GEN_0200113
>jgi|Dappu1|102596|fgenesh1_pg.C_scaffold_22000019	>jgi|Dappu1|235433|SNAP_00003491	jgi|Dappu1|306399|PASA_GEN_0500056	>jgi|Dappu1|112453|fgenesh1_pg.C_scaffold_96000053	>jgi|Dappu1|95105|fgenesh1_pg.C_scaffold_2000562
>jgi|Dappu1|102601|fgenesh1_pg.C_scaffold_22000024	>jgi|Dappu1|235437|SNAP_00003495	jgi|Dappu1|312000|NCBI_GNO_0500169	>jgi|Dappu1|112470|fgenesh1_pg.C_scaffold_96000070	>jgi|Dappu1|95112|fgenesh1_pg.C_scaffold_2000569
>jgi|Dappu1|102604|fgenesh1_pg.C_scaffold_22000027	>jgi|Dappu1|312143|NCBI_GNO_0500313	jgi|Dappu1|96671|fgenesh1_pg.C_scaffold_5000166	>jgi|Dappu1|112476|fgenesh1_pg.C_scaffold_97000006	>jgi|Dappu1|310541|NCBI_GNO_0200480
>jgi|Dappu1|102612|fgenesh1_pg.C_scaffold_22000035	>jgi|Dappu1|96847|fgenesh1_pg.C_scaffold_5000342	jgi|Dappu1|96672|fgenesh1_pg.C_scaffold_5000167	>jgi|Dappu1|112641|fgenesh1_pg.C_scaffold_98000065	>jgi|Dappu1|310546|NCBI_GNO_0200485
>jgi|Dappu1|102613|fgenesh1_pg.C_scaffold_22000036	>jgi|Dappu1|96851|fgenesh1_pg.C_scaffold_5000346	jgi|Dappu1|96684|fgenesh1_pg.C_scaffold_5000179	>jgi|Dappu1|112661|fgenesh1_pg.C_scaffold_99000003	>jgi|Dappu1|233432|SNAP_00001490
>jgi|Dappu1|102615|fgenesh1_pg.C_scaffold_22000038	>jgi|Dappu1|235455|SNAP_00003513	jgi|Dappu1|96685|fgenesh1_pg.C_scaffold_5000180	>jgi|Dappu1|11272|gw1.77.59.1	>jgi|Dappu1|220634|estExt_fgenesh1_pg.C_20613
>jgi|Dappu1|102629|fgenesh1_pg.C_scaffold_22000052	>jgi|Dappu1|306447|PASA_GEN_0500113	jgi|Dappu1|306406|PASA_GEN_0500063	>jgi|Dappu1|112776|fgenesh1_pg.C_scaffold_100000020	>jgi|Dappu1|303246|PASA_GEN_0200385
>jgi|Dappu1|102637|fgenesh1_pg.C_scaffold_22000060	>jgi|Dappu1|306448|PASA_GEN_0500114	jgi|Dappu1|235259|SNAP_00003317	>jgi|Dappu1|112897|fgenesh1_pg.C_scaffold_101000037	>jgi|Dappu1|233459|SNAP_00001517
>jgi|Dappu1|102638|fgenesh1_pg.C_scaffold_22000061	>jgi|Dappu1|306450|PASA_GEN_0500116	jgi|Dappu1|306407|PASA_GEN_0500064	>jgi|Dappu1|112904|fgenesh1_pg.C_scaffold_101000044	>jgi|Dappu1|95199|fgenesh1_pg.C_scaffold_2000656
>jgi|Dappu1|102646|fgenesh1_pg.C_scaffold_22000069	>jgi|Dappu1|312159|NCBI_GNO_0500329	jgi|Dappu1|96691|fgenesh1_pg.C_scaffold_5000186	>jgi|Dappu1|112977|fgenesh1_pg.C_scaffold_102000051	>jgi|Dappu1|91889|fgenesh1_kg.C_scaffold_2000065
>jgi|Dappu1|102652|fgenesh1_pg.C_scaffold_22000075	>jgi|Dappu1|235478|SNAP_00003536	jgi|Dappu1|312026|NCBI_GNO_0500195	>jgi|Dappu1|112997|fgenesh1_pg.C_scaffold_103000014	>jgi|Dappu1|247425|SNAP_00015483
>jgi|Dappu1|102655|fgenesh1_pg.C_scaffold_22000078	>jgi|Dappu1|235479|SNAP_00003537	jgi|Dappu1|312027|NCBI_GNO_0500196	>jgi|Dappu1|113063|fgenesh1_pg.C_scaffold_104000021	>jgi|Dappu1|305758|PASA_GEN_4000008
>jgi|Dappu1|102658|fgenesh1_pg.C_scaffold_22000081	>jgi|Dappu1|312170|NCBI_GNO_0500340	jgi|Dappu1|312031|NCBI_GNO_0500200	>jgi|Dappu1|113083|fgenesh1_pg.C_scaffold_104000041	>jgi|Dappu1|106011|fgenesh1_pg.C_scaffold_40000046
>jgi|Dappu1|102659|fgenesh1_pg.C_scaffold_22000082	>jgi|Dappu1|96891|fgenesh1_pg.C_scaffold_5000386	jgi|Dappu1|235273|SNAP_00003331	>jgi|Dappu1|113087|fgenesh1_pg.C_scaffold_104000045	>jgi|Dappu1|225665|estExt_fgenesh1_pg.C_400050
>jgi|Dappu1|102661|fgenesh1_pg.C_scaffold_22000084	>jgi|Dappu1|312181|NCBI_GNO_0500351	jgi|Dappu1|312034|NCBI_GNO_0500203	>jgi|Dappu1|113100|fgenesh1_pg.C_scaffold_104000058	>jgi|Dappu1|305794|PASA_GEN_4000056
>jgi|Dappu1|102662|fgenesh1_pg.C_scaffold_22000085	>jgi|Dappu1|312184|NCBI_GNO_0500354	jgi|Dappu1|312035|NCBI_GNO_0500204	>jgi|Dappu1|113152|fgenesh1_pg.C_scaffold_105000048	>jgi|Dappu1|106067|fgenesh1_pg.C_scaffold_40000102
>jgi|Dappu1|102663|fgenesh1_pg.C_scaffold_22000086	>jgi|Dappu1|306583|PASA_GEN_0500286	jgi|Dappu1|96699|fgenesh1_pg.C_scaffold_5000194	>jgi|Dappu1|113247|fgenesh1_pg.C_scaffold_107000023	>jgi|Dappu1|247551|SNAP_00015609
>jgi|Dappu1|102668|fgenesh1_pg.C_scaffold_22000091	>jgi|Dappu1|235499|SNAP_00003557	jgi|Dappu1|96700|fgenesh1_pg.C_scaffold_5000195	>jgi|Dappu1|113272|fgenesh1_pg.C_scaffold_107000048	>jgi|Dappu1|321364|NCBI_GNO_4000119
>jgi|Dappu1|102669|fgenesh1_pg.C_scaffold_22000092	>jgi|Dappu1|235501|SNAP_00003559	jgi|Dappu1|96706|fgenesh1_pg.C_scaffold_5000201	>jgi|Dappu1|113278|fgenesh1_pg.C_scaffold_107000054	>jgi|Dappu1|305805|PASA_GEN_4000071
>jgi|Dappu1|102672|fgenesh1_pg.C_scaffold_22000095	>jgi|Dappu1|235504|SNAP_00003562	jgi|Dappu1|235302|SNAP_00003360	>jgi|Dappu1|113293|fgenesh1_pg.C_scaffold_108000013	>jgi|Dappu1|247585|SNAP_00015643
>jgi|Dappu1|102673|fgenesh1_pg.C_scaffold_22000096	>jgi|Dappu1|306461|PASA_GEN_0500128	jgi|Dappu1|306536|PASA_GEN_0500223	>jgi|Dappu1|113301|fgenesh1_pg.C_scaffold_108000021	>jgi|Dappu1|247619|SNAP_00015677
>jgi|Dappu1|102674|fgenesh1_pg.C_scaffold_22000097	>jgi|Dappu1|311231|NCBI_GNO_0400003	jgi|Dappu1|306537|PASA_GEN_0500224	>jgi|Dappu1|113305|fgenesh1_pg.C_scaffold_108000025	>jgi|Dappu1|35904|gw1.40.262.1
>jgi|Dappu1|102677|fgenesh1_pg.C_scaffold_22000100	>jgi|Dappu1|234287|SNAP_00002345	jgi|Dappu1|235306|SNAP_00003364	>jgi|Dappu1|113337|fgenesh1_pg.C_scaffold_109000008	>jgi|Dappu1|262245|SNAP_00030303
>jgi|Dappu1|102680|fgenesh1_pg.C_scaffold_22000103	>jgi|Dappu1|234288|SNAP_00002346	jgi|Dappu1|96721|fgenesh1_pg.C_scaffold_5000216	>jgi|Dappu1|113362|fgenesh1_pg.C_scaffold_109000033	>jgi|Dappu1|115824|fgenesh1_pg.C_scaffold_166000022
>jgi|Dappu1|102681|fgenesh1_pg.C_scaffold_22000104	>jgi|Dappu1|234289|SNAP_00002347	jgi|Dappu1|306541|PASA_GEN_0500228	>jgi|Dappu1|113365|fgenesh1_pg.C_scaffold_109000036	>jgi|Dappu1|248859|SNAP_00016917
>jgi|Dappu1|102682|fgenesh1_pg.C_scaffold_22000105	>jgi|Dappu1|234292|SNAP_00002350	jgi|Dappu1|306542|PASA_GEN_0500229	>jgi|Dappu1|113367|fgenesh1_pg.C_scaffold_109000038	>jgi|Dappu1|306152|PASA_GEN_4600041
>jgi|Dappu1|102693|fgenesh1_pg.C_scaffold_22000116	>jgi|Dappu1|234294|SNAP_00002352	jgi|Dappu1|312063|NCBI_GNO_0500232	>jgi|Dappu1|113382|fgenesh1_pg.C_scaffold_109000053	>jgi|Dappu1|106904|fgenesh1_pg.C_scaffold_46000005
>jgi|Dappu1|102698|fgenesh1_pg.C_scaffold_22000121	>jgi|Dappu1|234295|SNAP_00002353	jgi|Dappu1|221551|estExt_fgenesh1_pg.C_50240	>jgi|Dappu1|113437|fgenesh1_pg.C_scaffold_110000047	>jgi|Dappu1|306155|PASA_GEN_4600045
>jgi|Dappu1|102703|fgenesh1_pg.C_scaffold_22000126	>jgi|Dappu1|42271|e_gw1.4.324.1	jgi|Dappu1|306419|PASA_GEN_0500077	>jgi|Dappu1|113490|fgenesh1_pg.C_scaffold_111000052	>jgi|Dappu1|322259|NCBI_GNO_4600015
>jgi|Dappu1|102713|fgenesh1_pg.C_scaffold_22000136	>jgi|Dappu1|305419|PASA_GEN_0400009	jgi|Dappu1|235345|SNAP_00003403	>jgi|Dappu1|113549|fgenesh1_pg.C_scaffold_112000040	>jgi|Dappu1|106920|fgenesh1_pg.C_scaffold_46000021
>jgi|Dappu1|102715|fgenesh1_pg.C_scaffold_22000138	>jgi|Dappu1|305420|PASA_GEN_0400010	jgi|Dappu1|235346|SNAP_00003404	>jgi|Dappu1|113576|fgenesh1_pg.C_scaffold_113000021	>jgi|Dappu1|322264|NCBI_GNO_4600020
>jgi|Dappu1|102719|fgenesh1_pg.C_scaffold_22000142	>jgi|Dappu1|305422|PASA_GEN_0400012	jgi|Dappu1|96748|fgenesh1_pg.C_scaffold_5000243	>jgi|Dappu1|113577|fgenesh1_pg.C_scaffold_113000022	>jgi|Dappu1|226008|estExt_fgenesh1_pg.C_460035
>jgi|Dappu1|102727|fgenesh1_pg.C_scaffold_22000150	>jgi|Dappu1|234314|SNAP_00002372	jgi|Dappu1|306549|PASA_GEN_0500241	>jgi|Dappu1|113578|fgenesh1_pg.C_scaffold_113000023	>jgi|Dappu1|322302|NCBI_GNO_4600058
>jgi|Dappu1|102729|fgenesh1_pg.C_scaffold_22000152	>jgi|Dappu1|234315|SNAP_00002373	jgi|Dappu1|127151|fgenesh1_pm.C_scaffold_5000051	>jgi|Dappu1|113626|fgenesh1_pg.C_scaffold_114000015	>jgi|Dappu1|322330|NCBI_GNO_4600086
>jgi|Dappu1|102730|fgenesh1_pg.C_scaffold_22000153	>jgi|Dappu1|234319|SNAP_00002377	jgi|Dappu1|96760|fgenesh1_pg.C_scaffold_5000255	>jgi|Dappu1|113639|fgenesh1_pg.C_scaffold_114000028	>jgi|Dappu1|306172|PASA_GEN_4600069
>jgi|Dappu1|102732|fgenesh1_pg.C_scaffold_22000155	>jgi|Dappu1|234331|SNAP_00002389	jgi|Dappu1|96762|fgenesh1_pg.C_scaffold_5000257	>jgi|Dappu1|113641|fgenesh1_pg.C_scaffold_114000030	>jgi|Dappu1|55080|e_gw1.46.127.1
>jgi|Dappu1|102735|fgenesh1_pg.C_scaffold_22000158	>jgi|Dappu1|95918|fgenesh1_pg.C_scaffold_4000034	jgi|Dappu1|96763|fgenesh1_pg.C_scaffold_5000258	>jgi|Dappu1|113643|fgenesh1_pg.C_scaffold_114000032	>jgi|Dappu1|226035|estExt_fgenesh1_pg.C_460101
>jgi|Dappu1|102736|fgenesh1_pg.C_scaffold_22000159	>jgi|Dappu1|221089|estExt_fgenesh1_pg.C_40035	jgi|Dappu1|235363|SNAP_00003421	>jgi|Dappu1|113753|fgenesh1_pg.C_scaffold_116000016	>jgi|Dappu1|107005|fgenesh1_pg.C_scaffold_46000106
>jgi|Dappu1|102738|fgenesh1_pg.C_scaffold_22000161	>jgi|Dappu1|311261|NCBI_GNO_0400033	jgi|Dappu1|235368|SNAP_00003426	>jgi|Dappu1|113831|fgenesh1_pg.C_scaffold_118000003	>jgi|Dappu1|322388|NCBI_GNO_4600144
>jgi|Dappu1|102740|fgenesh1_pg.C_scaffold_22000163	>jgi|Dappu1|234338|SNAP_00002396	jgi|Dappu1|312102|NCBI_GNO_0500271	>jgi|Dappu1|113836|fgenesh1_pg.C_scaffold_118000008	>jgi|Dappu1|306151|PASA_GEN_4600040
>jgi|Dappu1|102748|fgenesh1_pg.C_scaffold_22000171	>jgi|Dappu1|234339|SNAP_00002397	jgi|Dappu1|235381|SNAP_00003439	>jgi|Dappu1|113839|fgenesh1_pg.C_scaffold_118000011	>jgi|Dappu1|17830|gw1.103.34.1
>jgi|Dappu1|102753|fgenesh1_pg.C_scaffold_22000176	>jgi|Dappu1|305425|PASA_GEN_0400015	jgi|Dappu1|96782|fgenesh1_pg.C_scaffold_5000277	>jgi|Dappu1|113866|fgenesh1_pg.C_scaffold_118000038	>jgi|Dappu1|257531|SNAP_00025589
>jgi|Dappu1|102755|fgenesh1_pg.C_scaffold_22000178	>jgi|Dappu1|191528|estExt_Genewise1Plus.C_40066	jgi|Dappu1|312106|NCBI_GNO_0500275	>jgi|Dappu1|113867|fgenesh1_pg.C_scaffold_118000039	>jgi|Dappu1|61643|e_gw1.103.8.1
>jgi|Dappu1|102761|fgenesh1_pg.C_scaffold_22000184	>jgi|Dappu1|311269|NCBI_GNO_0400041	jgi|Dappu1|235385|SNAP_00003443	>jgi|Dappu1|113953|fgenesh1_pg.C_scaffold_120000029	>jgi|Dappu1|102049|fgenesh1_pg.C_scaffold_20000004
>jgi|Dappu1|102762|fgenesh1_pg.C_scaffold_22000185	>jgi|Dappu1|234345|SNAP_00002403	jgi|Dappu1|306427|PASA_GEN_0500086	>jgi|Dappu1|114086|fgenesh1_pg.C_scaffold_122000014	>jgi|Dappu1|102050|fgenesh1_pg.C_scaffold_20000005
>jgi|Dappu1|102763|fgenesh1_pg.C_scaffold_22000186	>jgi|Dappu1|234346|SNAP_00002404	jgi|Dappu1|96799|fgenesh1_pg.C_scaffold_5000294	>jgi|Dappu1|114148|fgenesh1_pg.C_scaffold_124000005	>jgi|Dappu1|102064|fgenesh1_pg.C_scaffold_20000019
>jgi|Dappu1|102764|fgenesh1_pg.C_scaffold_22000187	>jgi|Dappu1|311272|NCBI_GNO_0400044	jgi|Dappu1|207468|estExt_Genewise1.C_50431	>jgi|Dappu1|114157|fgenesh1_pg.C_scaffold_124000014	>jgi|Dappu1|241867|SNAP_00009925
>jgi|Dappu1|102767|fgenesh1_pg.C_scaffold_23000003	>jgi|Dappu1|234352|SNAP_00002410	jgi|Dappu1|312122|NCBI_GNO_0500292	>jgi|Dappu1|114159|fgenesh1_pg.C_scaffold_124000016	>jgi|Dappu1|317240|NCBI_GNO_2000058
>jgi|Dappu1|102776|fgenesh1_pg.C_scaffold_23000012	>jgi|Dappu1|95934|fgenesh1_pg.C_scaffold_4000050	jgi|Dappu1|207481|estExt_Genewise1.C_50447	>jgi|Dappu1|114192|fgenesh1_pg.C_scaffold_125000017	>jgi|Dappu1|49875|e_gw1.20.207.1
>jgi|Dappu1|102792|fgenesh1_pg.C_scaffold_23000028	>jgi|Dappu1|305579|PASA_GEN_0400197	jgi|Dappu1|235407|SNAP_00003465	>jgi|Dappu1|114200|fgenesh1_pg.C_scaffold_125000025	>jgi|Dappu1|49990|e_gw1.20.95.1
>jgi|Dappu1|102793|fgenesh1_pg.C_scaffold_23000029	>jgi|Dappu1|311281|NCBI_GNO_0400053	jgi|Dappu1|306437|PASA_GEN_0500101	>jgi|Dappu1|114202|fgenesh1_pg.C_scaffold_125000027	>jgi|Dappu1|242020|SNAP_00010078
>jgi|Dappu1|102795|fgenesh1_pg.C_scaffold_23000031	>jgi|Dappu1|305433|PASA_GEN_0400023	jgi|Dappu1|306438|PASA_GEN_0500102	>jgi|Dappu1|114256|fgenesh1_pg.C_scaffold_126000034	>jgi|Dappu1|224138|estExt_fgenesh1_pg.C_200146
>jgi|Dappu1|102823|fgenesh1_pg.C_scaffold_23000059	>jgi|Dappu1|95947|fgenesh1_pg.C_scaffold_4000063	jgi|Dappu1|96826|fgenesh1_pg.C_scaffold_5000321	>jgi|Dappu1|114268|fgenesh1_pg.C_scaffold_127000001	>jgi|Dappu1|303304|PASA_GEN_2000039
>jgi|Dappu1|102843|fgenesh1_pg.C_scaffold_23000079	>jgi|Dappu1|221111|estExt_fgenesh1_pg.C_40066	jgi|Dappu1|235425|SNAP_00003483	>jgi|Dappu1|114285|fgenesh1_pg.C_scaffold_127000018	>jgi|Dappu1|317385|NCBI_GNO_2000203
>jgi|Dappu1|102847|fgenesh1_pg.C_scaffold_23000083	>jgi|Dappu1|311290|NCBI_GNO_0400062	jgi|Dappu1|235433|SNAP_00003491	>jgi|Dappu1|114299|fgenesh1_pg.C_scaffold_127000032	>jgi|Dappu1|224175|estExt_fgenesh1_pg.C_200208
>jgi|Dappu1|102881|fgenesh1_pg.C_scaffold_23000117	>jgi|Dappu1|311291|NCBI_GNO_0400063	jgi|Dappu1|235437|SNAP_00003495	>jgi|Dappu1|114331|fgenesh1_pg.C_scaffold_128000027	>jgi|Dappu1|317412|NCBI_GNO_2000230
>jgi|Dappu1|102957|fgenesh1_pg.C_scaffold_23000193	>jgi|Dappu1|311292|NCBI_GNO_0400064	jgi|Dappu1|312143|NCBI_GNO_0500313	>jgi|Dappu1|114377|fgenesh1_pg.C_scaffold_129000042	>jgi|Dappu1|229000|estExt_fgenesh1_pg.C_1380032
>jgi|Dappu1|102999|fgenesh1_pg.C_scaffold_24000026	>jgi|Dappu1|305585|PASA_GEN_0400204	jgi|Dappu1|96847|fgenesh1_pg.C_scaffold_5000342	>jgi|Dappu1|114410|fgenesh1_pg.C_scaffold_130000005	>jgi|Dappu1|260450|SNAP_00028508
>jgi|Dappu1|103001|fgenesh1_pg.C_scaffold_24000028	>jgi|Dappu1|305435|PASA_GEN_0400025	jgi|Dappu1|96851|fgenesh1_pg.C_scaffold_5000346	>jgi|Dappu1|114478|fgenesh1_pg.C_scaffold_132000001	>jgi|Dappu1|93621|fgenesh1_kg.C_scaffold_138000002
>jgi|Dappu1|103005|fgenesh1_pg.C_scaffold_24000032	>jgi|Dappu1|305588|PASA_GEN_0400208	jgi|Dappu1|235455|SNAP_00003513	>jgi|Dappu1|114533|fgenesh1_pg.C_scaffold_132000056	>jgi|Dappu1|233537|SNAP_00001595
>jgi|Dappu1|103017|fgenesh1_pg.C_scaffold_24000044	>jgi|Dappu1|95968|fgenesh1_pg.C_scaffold_4000084	jgi|Dappu1|306447|PASA_GEN_0500113	>jgi|Dappu1|114538|fgenesh1_pg.C_scaffold_133000005	>jgi|Dappu1|310666|NCBI_GNO_0300017
>jgi|Dappu1|103026|fgenesh1_pg.C_scaffold_24000053	>jgi|Dappu1|234390|SNAP_00002448	jgi|Dappu1|306448|PASA_GEN_0500114	>jgi|Dappu1|114540|fgenesh1_pg.C_scaffold_133000007	>jgi|Dappu1|310669|NCBI_GNO_0300020
>jgi|Dappu1|10306|gw1.65.45.1	>jgi|Dappu1|95969|fgenesh1_pg.C_scaffold_4000085	jgi|Dappu1|306450|PASA_GEN_0500116	>jgi|Dappu1|114543|fgenesh1_pg.C_scaffold_133000010	>jgi|Dappu1|41046|e_gw1.3.466.1
>jgi|Dappu1|103079|fgenesh1_pg.C_scaffold_24000106	>jgi|Dappu1|95973|fgenesh1_pg.C_scaffold_4000089	jgi|Dappu1|312159|NCBI_GNO_0500329	>jgi|Dappu1|114556|fgenesh1_pg.C_scaffold_133000023	>jgi|Dappu1|206200|estExt_Genewise1.C_30165
>jgi|Dappu1|103090|fgenesh1_pg.C_scaffold_24000117	>jgi|Dappu1|305439|PASA_GEN_0400029	jgi|Dappu1|312166|NCBI_GNO_0500336	>jgi|Dappu1|114575|fgenesh1_pg.C_scaffold_134000007	>jgi|Dappu1|310786|NCBI_GNO_0300137
>jgi|Dappu1|103106|fgenesh1_pg.C_scaffold_24000133	>jgi|Dappu1|305444|PASA_GEN_0400036	jgi|Dappu1|235478|SNAP_00003536	>jgi|Dappu1|114576|fgenesh1_pg.C_scaffold_134000008	>jgi|Dappu1|310790|NCBI_GNO_0300141
>jgi|Dappu1|103107|fgenesh1_pg.C_scaffold_24000134	>jgi|Dappu1|305445|PASA_GEN_0400037	jgi|Dappu1|235479|SNAP_00003537	>jgi|Dappu1|114596|fgenesh1_pg.C_scaffold_134000028	>jgi|Dappu1|95407|fgenesh1_pg.C_scaffold_3000172
>jgi|Dappu1|103117|fgenesh1_pg.C_scaffold_24000144	>jgi|Dappu1|305597|PASA_GEN_0400219	jgi|Dappu1|312170|NCBI_GNO_0500340	>jgi|Dappu1|114609|fgenesh1_pg.C_scaffold_135000002	>jgi|Dappu1|95408|fgenesh1_pg.C_scaffold_3000173
>jgi|Dappu1|103119|fgenesh1_pg.C_scaffold_24000146	>jgi|Dappu1|305598|PASA_GEN_0400220	jgi|Dappu1|96891|fgenesh1_pg.C_scaffold_5000386	>jgi|Dappu1|114655|fgenesh1_pg.C_scaffold_135000048	>jgi|Dappu1|310811|NCBI_GNO_0300162
>jgi|Dappu1|103126|fgenesh1_pg.C_scaffold_24000153	>jgi|Dappu1|305446|PASA_GEN_0400038	jgi|Dappu1|312180|NCBI_GNO_0500350	>jgi|Dappu1|114661|fgenesh1_pg.C_scaffold_136000005	>jgi|Dappu1|310812|NCBI_GNO_0300163
>jgi|Dappu1|103145|fgenesh1_pg.C_scaffold_24000172	>jgi|Dappu1|95987|fgenesh1_pg.C_scaffold_4000103	jgi|Dappu1|312181|NCBI_GNO_0500351	>jgi|Dappu1|114729|fgenesh1_pg.C_scaffold_137000028	>jgi|Dappu1|310813|NCBI_GNO_0300164
>jgi|Dappu1|103149|fgenesh1_pg.C_scaffold_24000176	>jgi|Dappu1|95988|fgenesh1_pg.C_scaffold_4000104	jgi|Dappu1|312184|NCBI_GNO_0500354	>jgi|Dappu1|114740|fgenesh1_pg.C_scaffold_137000039	>jgi|Dappu1|310815|NCBI_GNO_0300166
>jgi|Dappu1|103157|fgenesh1_pg.C_scaffold_24000184	>jgi|Dappu1|311336|NCBI_GNO_0400109	jgi|Dappu1|306583|PASA_GEN_0500286	>jgi|Dappu1|114783|fgenesh1_pg.C_scaffold_138000040	>jgi|Dappu1|310834|NCBI_GNO_0300185
>jgi|Dappu1|103158|fgenesh1_pg.C_scaffold_24000185	>jgi|Dappu1|234424|SNAP_00002482	jgi|Dappu1|235499|SNAP_00003557	>jgi|Dappu1|114784|fgenesh1_pg.C_scaffold_138000041	>jgi|Dappu1|304702|PASA_GEN_0300174
>jgi|Dappu1|103160|fgenesh1_pg.C_scaffold_24000187	>jgi|Dappu1|234425|SNAP_00002483	jgi|Dappu1|235501|SNAP_00003559	>jgi|Dappu1|114814|fgenesh1_pg.C_scaffold_139000013	>jgi|Dappu1|304711|PASA_GEN_0300188
>jgi|Dappu1|103172|fgenesh1_pg.C_scaffold_24000199	>jgi|Dappu1|234426|SNAP_00002484	jgi|Dappu1|235504|SNAP_00003562	>jgi|Dappu1|114845|fgenesh1_pg.C_scaffold_140000011	>jgi|Dappu1|220863|estExt_fgenesh1_pg.C_30310
>jgi|Dappu1|103181|fgenesh1_pg.C_scaffold_24000208	>jgi|Dappu1|311339|NCBI_GNO_0400112	jgi|Dappu1|306461|PASA_GEN_0500128	>jgi|Dappu1|114865|fgenesh1_pg.C_scaffold_140000031	>jgi|Dappu1|310982|NCBI_GNO_0300334
>jgi|Dappu1|103197|fgenesh1_pg.C_scaffold_24000224	>jgi|Dappu1|234432|SNAP_00002490	jgi|Dappu1|312195|NCBI_GNO_0500365	>jgi|Dappu1|115006|fgenesh1_pg.C_scaffold_143000023	>jgi|Dappu1|220910|estExt_fgenesh1_pg.C_30383
>jgi|Dappu1|103198|fgenesh1_pg.C_scaffold_24000225	>jgi|Dappu1|234434|SNAP_00002492	jgi|Dappu1|311231|NCBI_GNO_0400003	>jgi|Dappu1|115031|fgenesh1_pg.C_scaffold_144000001	>jgi|Dappu1|95650|fgenesh1_pg.C_scaffold_3000415
>jgi|Dappu1|103202|fgenesh1_pg.C_scaffold_24000229	>jgi|Dappu1|234435|SNAP_00002493	jgi|Dappu1|234287|SNAP_00002345	>jgi|Dappu1|115036|fgenesh1_pg.C_scaffold_144000006	>jgi|Dappu1|311017|NCBI_GNO_0300370
>jgi|Dappu1|103224|fgenesh1_pg.C_scaffold_24000251	>jgi|Dappu1|234437|SNAP_00002495	jgi|Dappu1|234288|SNAP_00002346	>jgi|Dappu1|115044|fgenesh1_pg.C_scaffold_144000014	>jgi|Dappu1|311031|NCBI_GNO_0300384
>jgi|Dappu1|103239|fgenesh1_pg.C_scaffold_24000266	>jgi|Dappu1|234438|SNAP_00002496	jgi|Dappu1|234289|SNAP_00002347	>jgi|Dappu1|115070|fgenesh1_pg.C_scaffold_145000014	>jgi|Dappu1|311034|NCBI_GNO_0300387
>jgi|Dappu1|103243|fgenesh1_pg.C_scaffold_24000270	>jgi|Dappu1|234442|SNAP_00002500	jgi|Dappu1|234292|SNAP_00002350	>jgi|Dappu1|115150|fgenesh1_pg.C_scaffold_146000018	>jgi|Dappu1|230263|estExt_fgenesh1_kg.C_30070
>jgi|Dappu1|103271|fgenesh1_pg.C_scaffold_25000028	>jgi|Dappu1|311348|NCBI_GNO_0400121	jgi|Dappu1|234294|SNAP_00002352	>jgi|Dappu1|115190|fgenesh1_pg.C_scaffold_147000022	>jgi|Dappu1|234059|SNAP_00002117
>jgi|Dappu1|103276|fgenesh1_pg.C_scaffold_25000033	>jgi|Dappu1|305450|PASA_GEN_0400043	jgi|Dappu1|234295|SNAP_00002353	>jgi|Dappu1|115201|fgenesh1_pg.C_scaffold_147000033	>jgi|Dappu1|230269|estExt_fgenesh1_kg.C_30076
>jgi|Dappu1|103299|fgenesh1_pg.C_scaffold_25000056	>jgi|Dappu1|96002|fgenesh1_pg.C_scaffold_4000118	jgi|Dappu1|42271|e_gw1.4.324.1	>jgi|Dappu1|115212|fgenesh1_pg.C_scaffold_148000001	>jgi|Dappu1|95702|fgenesh1_pg.C_scaffold_3000467
>jgi|Dappu1|103311|fgenesh1_pg.C_scaffold_25000068	>jgi|Dappu1|305604|PASA_GEN_0400226	jgi|Dappu1|234299|SNAP_00002357	>jgi|Dappu1|115213|fgenesh1_pg.C_scaffold_148000002	>jgi|Dappu1|311102|NCBI_GNO_0300455
>jgi|Dappu1|103367|fgenesh1_pg.C_scaffold_25000124	>jgi|Dappu1|305608|PASA_GEN_0400230	jgi|Dappu1|311239|NCBI_GNO_0400011	>jgi|Dappu1|115221|fgenesh1_pg.C_scaffold_148000010	>jgi|Dappu1|234144|SNAP_00002202
>jgi|Dappu1|103368|fgenesh1_pg.C_scaffold_25000125	>jgi|Dappu1|311360|NCBI_GNO_0400133	jgi|Dappu1|305419|PASA_GEN_0400009	>jgi|Dappu1|115251|fgenesh1_pg.C_scaffold_149000009	>jgi|Dappu1|191362|estExt_Genewise1Plus.C_30655
>jgi|Dappu1|103372|fgenesh1_pg.C_scaffold_25000129	>jgi|Dappu1|221144|estExt_fgenesh1_pg.C_40132	jgi|Dappu1|305420|PASA_GEN_0400010	>jgi|Dappu1|115315|fgenesh1_pg.C_scaffold_151000033	>jgi|Dappu1|311122|NCBI_GNO_0300475
>jgi|Dappu1|103422|fgenesh1_pg.C_scaffold_25000179	>jgi|Dappu1|96017|fgenesh1_pg.C_scaffold_4000133	jgi|Dappu1|305422|PASA_GEN_0400012	>jgi|Dappu1|115349|fgenesh1_pg.C_scaffold_153000005	>jgi|Dappu1|311126|NCBI_GNO_0300479
>jgi|Dappu1|103423|fgenesh1_pg.C_scaffold_25000180	>jgi|Dappu1|234464|SNAP_00002522	jgi|Dappu1|234314|SNAP_00002372	>jgi|Dappu1|115369|fgenesh1_pg.C_scaffold_153000025	>jgi|Dappu1|95791|fgenesh1_pg.C_scaffold_3000556
>jgi|Dappu1|103469|fgenesh1_pg.C_scaffold_25000226	>jgi|Dappu1|234465|SNAP_00002523	jgi|Dappu1|234315|SNAP_00002373	>jgi|Dappu1|115378|fgenesh1_pg.C_scaffold_154000003	>jgi|Dappu1|304786|PASA_GEN_0300286
>jgi|Dappu1|103470|fgenesh1_pg.C_scaffold_25000227	>jgi|Dappu1|234467|SNAP_00002525	jgi|Dappu1|234319|SNAP_00002377	>jgi|Dappu1|115384|fgenesh1_pg.C_scaffold_154000009	>jgi|Dappu1|311170|NCBI_GNO_0300523
>jgi|Dappu1|103482|fgenesh1_pg.C_scaffold_25000239	>jgi|Dappu1|305455|PASA_GEN_0400049	jgi|Dappu1|234331|SNAP_00002389	>jgi|Dappu1|115399|fgenesh1_pg.C_scaffold_155000002	>jgi|Dappu1|311199|NCBI_GNO_0300553
>jgi|Dappu1|103516|fgenesh1_pg.C_scaffold_25000273	>jgi|Dappu1|42599|e_gw1.4.864.1	jgi|Dappu1|305574|PASA_GEN_0400192	>jgi|Dappu1|115409|fgenesh1_pg.C_scaffold_155000012	>jgi|Dappu1|105696|fgenesh1_pg.C_scaffold_38000022
>jgi|Dappu1|103525|fgenesh1_pg.C_scaffold_25000282	>jgi|Dappu1|311368|NCBI_GNO_0400141	jgi|Dappu1|95918|fgenesh1_pg.C_scaffold_4000034	>jgi|Dappu1|115437|fgenesh1_pg.C_scaffold_155000040	>jgi|Dappu1|246972|SNAP_00015030
>jgi|Dappu1|103527|fgenesh1_pg.C_scaffold_25000284	>jgi|Dappu1|311374|NCBI_GNO_0400147	jgi|Dappu1|221089|estExt_fgenesh1_pg.C_40035	>jgi|Dappu1|115438|fgenesh1_pg.C_scaffold_155000041	>jgi|Dappu1|231106|estExt_fgenesh1_kg.C_380001
>jgi|Dappu1|103554|fgenesh1_pg.C_scaffold_25000311	>jgi|Dappu1|234482|SNAP_00002540	jgi|Dappu1|311261|NCBI_GNO_0400033	>jgi|Dappu1|115455|fgenesh1_pg.C_scaffold_156000014	>jgi|Dappu1|225545|estExt_fgenesh1_pg.C_380058
>jgi|Dappu1|103558|fgenesh1_pg.C_scaffold_25000315	>jgi|Dappu1|234483|SNAP_00002541	jgi|Dappu1|234338|SNAP_00002396	>jgi|Dappu1|115457|fgenesh1_pg.C_scaffold_156000016	>jgi|Dappu1|105740|fgenesh1_pg.C_scaffold_38000066
>jgi|Dappu1|103561|fgenesh1_pg.C_scaffold_25000318	>jgi|Dappu1|234491|SNAP_00002549	jgi|Dappu1|234339|SNAP_00002397	>jgi|Dappu1|115460|fgenesh1_pg.C_scaffold_156000019	>jgi|Dappu1|105756|fgenesh1_pg.C_scaffold_38000082
>jgi|Dappu1|103564|fgenesh1_pg.C_scaffold_26000003	>jgi|Dappu1|305615|PASA_GEN_0400240	jgi|Dappu1|305425|PASA_GEN_0400015	>jgi|Dappu1|115736|fgenesh1_pg.C_scaffold_163000055	>jgi|Dappu1|225553|estExt_fgenesh1_pg.C_380087
>jgi|Dappu1|103565|fgenesh1_pg.C_scaffold_26000004	>jgi|Dappu1|311389|NCBI_GNO_0400162	jgi|Dappu1|311266|NCBI_GNO_0400038	>jgi|Dappu1|115746|fgenesh1_pg.C_scaffold_164000001	>jgi|Dappu1|247103|SNAP_00015161
>jgi|Dappu1|103572|fgenesh1_pg.C_scaffold_26000011	>jgi|Dappu1|234500|SNAP_00002558	jgi|Dappu1|191528|estExt_Genewise1Plus.C_40066	>jgi|Dappu1|115747|fgenesh1_pg.C_scaffold_164000002	>jgi|Dappu1|105781|fgenesh1_pg.C_scaffold_38000107
>jgi|Dappu1|103575|fgenesh1_pg.C_scaffold_26000014	>jgi|Dappu1|305618|PASA_GEN_0400244	jgi|Dappu1|311269|NCBI_GNO_0400041	>jgi|Dappu1|115755|fgenesh1_pg.C_scaffold_164000010	>jgi|Dappu1|305305|PASA_GEN_3800011
>jgi|Dappu1|103578|fgenesh1_pg.C_scaffold_26000017	>jgi|Dappu1|234512|SNAP_00002570	jgi|Dappu1|234345|SNAP_00002403	>jgi|Dappu1|115777|fgenesh1_pg.C_scaffold_164000032	>jgi|Dappu1|105793|fgenesh1_pg.C_scaffold_38000119
>jgi|Dappu1|103579|fgenesh1_pg.C_scaffold_26000018	>jgi|Dappu1|234518|SNAP_00002576	jgi|Dappu1|234346|SNAP_00002404	>jgi|Dappu1|115779|fgenesh1_pg.C_scaffold_164000034	>jgi|Dappu1|105800|fgenesh1_pg.C_scaffold_38000126
>jgi|Dappu1|103593|fgenesh1_pg.C_scaffold_26000032	>jgi|Dappu1|234519|SNAP_00002577	jgi|Dappu1|311272|NCBI_GNO_0400044	>jgi|Dappu1|115827|fgenesh1_pg.C_scaffold_166000025	>jgi|Dappu1|247170|SNAP_00015228
>jgi|Dappu1|103601|fgenesh1_pg.C_scaffold_26000040	>jgi|Dappu1|311404|NCBI_GNO_0400177	jgi|Dappu1|234352|SNAP_00002410	>jgi|Dappu1|115883|fgenesh1_pg.C_scaffold_168000013	>jgi|Dappu1|304272|PASA_GEN_2800001
>jgi|Dappu1|103603|fgenesh1_pg.C_scaffold_26000042	>jgi|Dappu1|311415|NCBI_GNO_0400188	jgi|Dappu1|95934|fgenesh1_pg.C_scaffold_4000050	>jgi|Dappu1|115884|fgenesh1_pg.C_scaffold_168000014	>jgi|Dappu1|304324|PASA_GEN_2800067
>jgi|Dappu1|103604|fgenesh1_pg.C_scaffold_26000043	>jgi|Dappu1|311417|NCBI_GNO_0400190	jgi|Dappu1|305579|PASA_GEN_0400197	>jgi|Dappu1|115995|fgenesh1_pg.C_scaffold_172000008	>jgi|Dappu1|304331|PASA_GEN_2800074
>jgi|Dappu1|103606|fgenesh1_pg.C_scaffold_26000045	>jgi|Dappu1|305467|PASA_GEN_0400062	jgi|Dappu1|311281|NCBI_GNO_0400053	>jgi|Dappu1|115998|fgenesh1_pg.C_scaffold_172000011	>jgi|Dappu1|319144|NCBI_GNO_2800043
>jgi|Dappu1|103640|fgenesh1_pg.C_scaffold_26000079	>jgi|Dappu1|234540|SNAP_00002598	jgi|Dappu1|305581|PASA_GEN_0400199	>jgi|Dappu1|116054|fgenesh1_pg.C_scaffold_173000044	>jgi|Dappu1|103951|fgenesh1_pg.C_scaffold_28000062
>jgi|Dappu1|103643|fgenesh1_pg.C_scaffold_26000082	>jgi|Dappu1|234541|SNAP_00002599	jgi|Dappu1|305433|PASA_GEN_0400023	>jgi|Dappu1|116126|fgenesh1_pg.C_scaffold_175000009	>jgi|Dappu1|103962|fgenesh1_pg.C_scaffold_28000073
>jgi|Dappu1|103644|fgenesh1_pg.C_scaffold_26000083	>jgi|Dappu1|234546|SNAP_00002604	jgi|Dappu1|95947|fgenesh1_pg.C_scaffold_4000063	>jgi|Dappu1|116139|fgenesh1_pg.C_scaffold_175000022	>jgi|Dappu1|304299|PASA_GEN_2800037
>jgi|Dappu1|103668|fgenesh1_pg.C_scaffold_26000107	>jgi|Dappu1|234547|SNAP_00002605	jgi|Dappu1|221111|estExt_fgenesh1_pg.C_40066	>jgi|Dappu1|116215|fgenesh1_pg.C_scaffold_178000007	>jgi|Dappu1|27067|gw1.28.241.1
>jgi|Dappu1|103704|fgenesh1_pg.C_scaffold_26000143	>jgi|Dappu1|311429|NCBI_GNO_0400202	jgi|Dappu1|311290|NCBI_GNO_0400062	>jgi|Dappu1|116310|fgenesh1_pg.C_scaffold_180000006	>jgi|Dappu1|104018|fgenesh1_pg.C_scaffold_28000129
>jgi|Dappu1|103707|fgenesh1_pg.C_scaffold_26000146	>jgi|Dappu1|234550|SNAP_00002608	jgi|Dappu1|311291|NCBI_GNO_0400063	>jgi|Dappu1|116313|fgenesh1_pg.C_scaffold_180000009	>jgi|Dappu1|304365|PASA_GEN_2800115
>jgi|Dappu1|103708|fgenesh1_pg.C_scaffold_26000147	>jgi|Dappu1|305471|PASA_GEN_0400068	jgi|Dappu1|311292|NCBI_GNO_0400064	>jgi|Dappu1|116408|fgenesh1_pg.C_scaffold_183000025	>jgi|Dappu1|52097|e_gw1.28.97.1
>jgi|Dappu1|103709|fgenesh1_pg.C_scaffold_26000148	>jgi|Dappu1|305472|PASA_GEN_0400069	jgi|Dappu1|305585|PASA_GEN_0400204	>jgi|Dappu1|116426|fgenesh1_pg.C_scaffold_183000043	>jgi|Dappu1|304317|PASA_GEN_2800060
>jgi|Dappu1|103715|fgenesh1_pg.C_scaffold_26000154	>jgi|Dappu1|305473|PASA_GEN_0400070	jgi|Dappu1|305435|PASA_GEN_0400025	>jgi|Dappu1|116466|fgenesh1_pg.C_scaffold_185000006	>jgi|Dappu1|104119|fgenesh1_pg.C_scaffold_28000230
>jgi|Dappu1|103725|fgenesh1_pg.C_scaffold_26000164	>jgi|Dappu1|96105|fgenesh1_pg.C_scaffold_4000221	jgi|Dappu1|305588|PASA_GEN_0400208	>jgi|Dappu1|116508|fgenesh1_pg.C_scaffold_187000020	>jgi|Dappu1|312752|NCBI_GNO_0700025
>jgi|Dappu1|103726|fgenesh1_pg.C_scaffold_26000165	>jgi|Dappu1|311447|NCBI_GNO_0400220	jgi|Dappu1|95968|fgenesh1_pg.C_scaffold_4000084	>jgi|Dappu1|116519|fgenesh1_pg.C_scaffold_187000031	>jgi|Dappu1|312758|NCBI_GNO_0700031
>jgi|Dappu1|103727|fgenesh1_pg.C_scaffold_26000166	>jgi|Dappu1|311453|NCBI_GNO_0400227	jgi|Dappu1|234390|SNAP_00002448	>jgi|Dappu1|116521|fgenesh1_pg.C_scaffold_187000033	>jgi|Dappu1|97492|fgenesh1_pg.C_scaffold_7000037
>jgi|Dappu1|103732|fgenesh1_pg.C_scaffold_26000171	>jgi|Dappu1|311454|NCBI_GNO_0400228	jgi|Dappu1|95969|fgenesh1_pg.C_scaffold_4000085	>jgi|Dappu1|116586|fgenesh1_pg.C_scaffold_189000026	>jgi|Dappu1|97497|fgenesh1_pg.C_scaffold_7000042
>jgi|Dappu1|103740|fgenesh1_pg.C_scaffold_26000179	>jgi|Dappu1|311457|NCBI_GNO_0400231	jgi|Dappu1|95973|fgenesh1_pg.C_scaffold_4000089	>jgi|Dappu1|116599|fgenesh1_pg.C_scaffold_190000013	>jgi|Dappu1|97500|fgenesh1_pg.C_scaffold_7000045
>jgi|Dappu1|103741|fgenesh1_pg.C_scaffold_26000180	>jgi|Dappu1|221202|estExt_fgenesh1_pg.C_40232	jgi|Dappu1|305439|PASA_GEN_0400029	>jgi|Dappu1|116600|fgenesh1_pg.C_scaffold_190000014	>jgi|Dappu1|312776|NCBI_GNO_0700049
>jgi|Dappu1|103745|fgenesh1_pg.C_scaffold_26000184	>jgi|Dappu1|311465|NCBI_GNO_0400239	jgi|Dappu1|305444|PASA_GEN_0400036	>jgi|Dappu1|116658|fgenesh1_pg.C_scaffold_192000023	>jgi|Dappu1|236216|SNAP_00004274
>jgi|Dappu1|103749|fgenesh1_pg.C_scaffold_26000188	>jgi|Dappu1|234588|SNAP_00002646	jgi|Dappu1|305445|PASA_GEN_0400037	>jgi|Dappu1|116661|fgenesh1_pg.C_scaffold_192000026	>jgi|Dappu1|97513|fgenesh1_pg.C_scaffold_7000058
>jgi|Dappu1|103751|fgenesh1_pg.C_scaffold_26000190	>jgi|Dappu1|234589|SNAP_00002647	jgi|Dappu1|305597|PASA_GEN_0400219	>jgi|Dappu1|116685|fgenesh1_pg.C_scaffold_193000024	>jgi|Dappu1|97516|fgenesh1_pg.C_scaffold_7000061
>jgi|Dappu1|103752|fgenesh1_pg.C_scaffold_26000191	>jgi|Dappu1|305642|PASA_GEN_0400277	jgi|Dappu1|305598|PASA_GEN_0400220	>jgi|Dappu1|116713|fgenesh1_pg.C_scaffold_195000016	>jgi|Dappu1|230460|estExt_fgenesh1_kg.C_70024
>jgi|Dappu1|103753|fgenesh1_pg.C_scaffold_26000192	>jgi|Dappu1|234601|SNAP_00002659	jgi|Dappu1|305446|PASA_GEN_0400038	>jgi|Dappu1|116718|fgenesh1_pg.C_scaffold_195000021	>jgi|Dappu1|236286|SNAP_00004344
>jgi|Dappu1|103764|fgenesh1_pg.C_scaffold_27000011	>jgi|Dappu1|234609|SNAP_00002667	jgi|Dappu1|95987|fgenesh1_pg.C_scaffold_4000103	>jgi|Dappu1|116736|fgenesh1_pg.C_scaffold_196000015	>jgi|Dappu1|97595|fgenesh1_pg.C_scaffold_7000140
>jgi|Dappu1|103769|fgenesh1_pg.C_scaffold_27000016	>jgi|Dappu1|234612|SNAP_00002670	jgi|Dappu1|95988|fgenesh1_pg.C_scaffold_4000104	>jgi|Dappu1|116757|fgenesh1_pg.C_scaffold_197000016	>jgi|Dappu1|307767|PASA_GEN_0700043
>jgi|Dappu1|103770|fgenesh1_pg.C_scaffold_27000017	>jgi|Dappu1|234614|SNAP_00002672	jgi|Dappu1|311336|NCBI_GNO_0400109	>jgi|Dappu1|116824|fgenesh1_pg.C_scaffold_201000016	>jgi|Dappu1|97626|fgenesh1_pg.C_scaffold_7000171
>jgi|Dappu1|103778|fgenesh1_pg.C_scaffold_27000025	>jgi|Dappu1|234615|SNAP_00002673	jgi|Dappu1|234424|SNAP_00002482	>jgi|Dappu1|116839|fgenesh1_pg.C_scaffold_202000006	>jgi|Dappu1|97638|fgenesh1_pg.C_scaffold_7000183
>jgi|Dappu1|103780|fgenesh1_pg.C_scaffold_27000027	>jgi|Dappu1|234616|SNAP_00002674	jgi|Dappu1|234425|SNAP_00002483	>jgi|Dappu1|116871|fgenesh1_pg.C_scaffold_204000008	>jgi|Dappu1|312895|NCBI_GNO_0700168
>jgi|Dappu1|103788|fgenesh1_pg.C_scaffold_27000035	>jgi|Dappu1|96137|fgenesh1_pg.C_scaffold_4000253	jgi|Dappu1|234426|SNAP_00002484	>jgi|Dappu1|116906|fgenesh1_pg.C_scaffold_206000018	>jgi|Dappu1|307775|PASA_GEN_0700052
>jgi|Dappu1|103793|fgenesh1_pg.C_scaffold_27000040	>jgi|Dappu1|305492|PASA_GEN_0400091	jgi|Dappu1|311339|NCBI_GNO_0400112	>jgi|Dappu1|117036|fgenesh1_pg.C_scaffold_212000011	>jgi|Dappu1|312910|NCBI_GNO_0700183
>jgi|Dappu1|103794|fgenesh1_pg.C_scaffold_27000041	>jgi|Dappu1|311490|NCBI_GNO_0400264	jgi|Dappu1|95996|fgenesh1_pg.C_scaffold_4000112	>jgi|Dappu1|117083|fgenesh1_pg.C_scaffold_215000006	>jgi|Dappu1|312911|NCBI_GNO_0700184
>jgi|Dappu1|103797|fgenesh1_pg.C_scaffold_27000044	>jgi|Dappu1|234625|SNAP_00002683	jgi|Dappu1|311341|NCBI_GNO_0400114	>jgi|Dappu1|117092|fgenesh1_pg.C_scaffold_215000015	>jgi|Dappu1|307869|PASA_GEN_0700172
>jgi|Dappu1|103798|fgenesh1_pg.C_scaffold_27000045	>jgi|Dappu1|96152|fgenesh1_pg.C_scaffold_4000268	jgi|Dappu1|234432|SNAP_00002490	>jgi|Dappu1|117093|fgenesh1_pg.C_scaffold_215000016	>jgi|Dappu1|236429|SNAP_00004487
>jgi|Dappu1|103800|fgenesh1_pg.C_scaffold_27000047	>jgi|Dappu1|221220|estExt_fgenesh1_pg.C_40269	jgi|Dappu1|234434|SNAP_00002492	>jgi|Dappu1|117104|fgenesh1_pg.C_scaffold_216000005	>jgi|Dappu1|236433|SNAP_00004491
>jgi|Dappu1|103810|fgenesh1_pg.C_scaffold_27000057	>jgi|Dappu1|305494|PASA_GEN_0400094	jgi|Dappu1|234435|SNAP_00002493	>jgi|Dappu1|117124|fgenesh1_pg.C_scaffold_217000009	>jgi|Dappu1|44231|e_gw1.7.113.1
>jgi|Dappu1|103811|fgenesh1_pg.C_scaffold_27000058	>jgi|Dappu1|305495|PASA_GEN_0400095	jgi|Dappu1|234437|SNAP_00002495	>jgi|Dappu1|117135|fgenesh1_pg.C_scaffold_218000005	>jgi|Dappu1|208066|estExt_Genewise1.C_70322
>jgi|Dappu1|103815|fgenesh1_pg.C_scaffold_27000062	>jgi|Dappu1|305650|PASA_GEN_0400287	jgi|Dappu1|234438|SNAP_00002496	>jgi|Dappu1|117136|fgenesh1_pg.C_scaffold_218000006	>jgi|Dappu1|307782|PASA_GEN_0700062
>jgi|Dappu1|103817|fgenesh1_pg.C_scaffold_27000064	>jgi|Dappu1|234666|SNAP_00002724	jgi|Dappu1|234442|SNAP_00002500	>jgi|Dappu1|117142|fgenesh1_pg.C_scaffold_218000012	>jgi|Dappu1|312931|NCBI_GNO_0700204
>jgi|Dappu1|103819|fgenesh1_pg.C_scaffold_27000066	>jgi|Dappu1|221227|estExt_fgenesh1_pg.C_40282	jgi|Dappu1|311348|NCBI_GNO_0400121	>jgi|Dappu1|117153|fgenesh1_pg.C_scaffold_219000005	>jgi|Dappu1|307786|PASA_GEN_0700067
>jgi|Dappu1|103823|fgenesh1_pg.C_scaffold_27000070	>jgi|Dappu1|234676|SNAP_00002734	jgi|Dappu1|305450|PASA_GEN_0400043	>jgi|Dappu1|117187|fgenesh1_pg.C_scaffold_219000039	>jgi|Dappu1|312939|NCBI_GNO_0700212
>jgi|Dappu1|103826|fgenesh1_pg.C_scaffold_27000073	>jgi|Dappu1|96174|fgenesh1_pg.C_scaffold_4000290	jgi|Dappu1|96002|fgenesh1_pg.C_scaffold_4000118	>jgi|Dappu1|117228|fgenesh1_pg.C_scaffold_221000014	>jgi|Dappu1|97720|fgenesh1_pg.C_scaffold_7000265
>jgi|Dappu1|103827|fgenesh1_pg.C_scaffold_27000074	>jgi|Dappu1|221235|estExt_fgenesh1_pg.C_40292	jgi|Dappu1|305604|PASA_GEN_0400226	>jgi|Dappu1|117249|fgenesh1_pg.C_scaffold_222000020	>jgi|Dappu1|222017|estExt_fgenesh1_pg.C_70268
>jgi|Dappu1|103833|fgenesh1_pg.C_scaffold_27000080	>jgi|Dappu1|305500|PASA_GEN_0400100	jgi|Dappu1|305608|PASA_GEN_0400230	>jgi|Dappu1|117271|fgenesh1_pg.C_scaffold_223000019	>jgi|Dappu1|222020|estExt_fgenesh1_pg.C_70274
>jgi|Dappu1|103835|fgenesh1_pg.C_scaffold_27000082	>jgi|Dappu1|96187|fgenesh1_pg.C_scaffold_4000303	jgi|Dappu1|311360|NCBI_GNO_0400133	>jgi|Dappu1|117284|fgenesh1_pg.C_scaffold_224000005	>jgi|Dappu1|97738|fgenesh1_pg.C_scaffold_7000283
>jgi|Dappu1|103837|fgenesh1_pg.C_scaffold_27000084	>jgi|Dappu1|221246|estExt_fgenesh1_pg.C_40304	jgi|Dappu1|221144|estExt_fgenesh1_pg.C_40132	>jgi|Dappu1|117285|fgenesh1_pg.C_scaffold_224000006	>jgi|Dappu1|307889|PASA_GEN_0700197
>jgi|Dappu1|103838|fgenesh1_pg.C_scaffold_27000085	>jgi|Dappu1|305658|PASA_GEN_0400297	jgi|Dappu1|96017|fgenesh1_pg.C_scaffold_4000133	>jgi|Dappu1|117307|fgenesh1_pg.C_scaffold_225000015	>jgi|Dappu1|97772|fgenesh1_pg.C_scaffold_7000317
>jgi|Dappu1|103844|fgenesh1_pg.C_scaffold_27000091	>jgi|Dappu1|221249|estExt_fgenesh1_pg.C_40308	jgi|Dappu1|234464|SNAP_00002522	>jgi|Dappu1|117325|fgenesh1_pg.C_scaffold_227000004	>jgi|Dappu1|97775|fgenesh1_pg.C_scaffold_7000320
>jgi|Dappu1|103845|fgenesh1_pg.C_scaffold_27000092	>jgi|Dappu1|96196|fgenesh1_pg.C_scaffold_4000312	jgi|Dappu1|234465|SNAP_00002523	>jgi|Dappu1|117347|fgenesh1_pg.C_scaffold_228000012	>jgi|Dappu1|313009|NCBI_GNO_0700282
>jgi|Dappu1|103858|fgenesh1_pg.C_scaffold_27000105	>jgi|Dappu1|305505|PASA_GEN_0400106	jgi|Dappu1|234467|SNAP_00002525	>jgi|Dappu1|117348|fgenesh1_pg.C_scaffold_228000013	>jgi|Dappu1|307804|PASA_GEN_0700089
>jgi|Dappu1|103861|fgenesh1_pg.C_scaffold_27000108	>jgi|Dappu1|234700|SNAP_00002758	jgi|Dappu1|305455|PASA_GEN_0400049	>jgi|Dappu1|117365|fgenesh1_pg.C_scaffold_229000011	>jgi|Dappu1|313023|NCBI_GNO_0700296
>jgi|Dappu1|103866|fgenesh1_pg.C_scaffold_27000113	>jgi|Dappu1|311548|NCBI_GNO_0400322	jgi|Dappu1|42599|e_gw1.4.864.1	>jgi|Dappu1|117368|fgenesh1_pg.C_scaffold_230000002	>jgi|Dappu1|236574|SNAP_00004632
>jgi|Dappu1|103867|fgenesh1_pg.C_scaffold_27000114	>jgi|Dappu1|234702|SNAP_00002760	jgi|Dappu1|311368|NCBI_GNO_0400141	>jgi|Dappu1|117422|fgenesh1_pg.C_scaffold_233000001	>jgi|Dappu1|36046|gw1.7.519.1
>jgi|Dappu1|103871|fgenesh1_pg.C_scaffold_27000118	>jgi|Dappu1|96205|fgenesh1_pg.C_scaffold_4000321	jgi|Dappu1|311374|NCBI_GNO_0400147	>jgi|Dappu1|117424|fgenesh1_pg.C_scaffold_233000003	>jgi|Dappu1|323284|NCBI_GNO_5300012
>jgi|Dappu1|103872|fgenesh1_pg.C_scaffold_27000119	>jgi|Dappu1|234710|SNAP_00002768	jgi|Dappu1|234482|SNAP_00002540	>jgi|Dappu1|117443|fgenesh1_pg.C_scaffold_234000005	>jgi|Dappu1|250423|SNAP_00018481
>jgi|Dappu1|103873|fgenesh1_pg.C_scaffold_27000120	>jgi|Dappu1|305507|PASA_GEN_0400108	jgi|Dappu1|234483|SNAP_00002541	>jgi|Dappu1|117451|fgenesh1_pg.C_scaffold_234000013	>jgi|Dappu1|107902|fgenesh1_pg.C_scaffold_53000075
>jgi|Dappu1|103877|fgenesh1_pg.C_scaffold_27000124	>jgi|Dappu1|25900|gw1.4.644.1	jgi|Dappu1|234485|SNAP_00002543	>jgi|Dappu1|117480|fgenesh1_pg.C_scaffold_236000008	>jgi|Dappu1|306773|PASA_GEN_5300040
>jgi|Dappu1|103884|fgenesh1_pg.C_scaffold_27000131	>jgi|Dappu1|305509|PASA_GEN_0400110	jgi|Dappu1|234486|SNAP_00002544	>jgi|Dappu1|117525|fgenesh1_pg.C_scaffold_240000005	>jgi|Dappu1|107963|fgenesh1_pg.C_scaffold_53000136
>jgi|Dappu1|103885|fgenesh1_pg.C_scaffold_27000132	>jgi|Dappu1|305510|PASA_GEN_0400111	jgi|Dappu1|234491|SNAP_00002549	>jgi|Dappu1|117590|fgenesh1_pg.C_scaffold_245000003	>jgi|Dappu1|328881|NCBI_GNO_11100002
>jgi|Dappu1|103888|fgenesh1_pg.C_scaffold_27000135	>jgi|Dappu1|234740|SNAP_00002798	jgi|Dappu1|305615|PASA_GEN_0400240	>jgi|Dappu1|117617|fgenesh1_pg.C_scaffold_246000006	>jgi|Dappu1|62022|e_gw1.111.40.1
>jgi|Dappu1|103893|fgenesh1_pg.C_scaffold_28000004	>jgi|Dappu1|311574|NCBI_GNO_0400348	jgi|Dappu1|311389|NCBI_GNO_0400162	>jgi|Dappu1|117672|fgenesh1_pg.C_scaffold_251000004	>jgi|Dappu1|258308|SNAP_00026366
>jgi|Dappu1|103895|fgenesh1_pg.C_scaffold_28000006	>jgi|Dappu1|234744|SNAP_00002802	jgi|Dappu1|234500|SNAP_00002558	>jgi|Dappu1|117677|fgenesh1_pg.C_scaffold_251000009	>jgi|Dappu1|328941|NCBI_GNO_11100065
>jgi|Dappu1|103904|fgenesh1_pg.C_scaffold_28000015	>jgi|Dappu1|311577|NCBI_GNO_0400351	jgi|Dappu1|305618|PASA_GEN_0400244	>jgi|Dappu1|117711|fgenesh1_pg.C_scaffold_255000001	>jgi|Dappu1|317739|NCBI_GNO_2200027
>jgi|Dappu1|103920|fgenesh1_pg.C_scaffold_28000031	>jgi|Dappu1|311579|NCBI_GNO_0400353	jgi|Dappu1|234512|SNAP_00002570	>jgi|Dappu1|117723|fgenesh1_pg.C_scaffold_257000001	>jgi|Dappu1|50372|e_gw1.22.91.1
>jgi|Dappu1|103921|fgenesh1_pg.C_scaffold_28000032	>jgi|Dappu1|305680|PASA_GEN_0400322	jgi|Dappu1|234518|SNAP_00002576	>jgi|Dappu1|117724|fgenesh1_pg.C_scaffold_257000002	>jgi|Dappu1|303591|PASA_GEN_2200003
>jgi|Dappu1|103929|fgenesh1_pg.C_scaffold_28000040	>jgi|Dappu1|305681|PASA_GEN_0400323	jgi|Dappu1|234519|SNAP_00002577	>jgi|Dappu1|117729|fgenesh1_pg.C_scaffold_257000007	>jgi|Dappu1|242525|SNAP_00010583
>jgi|Dappu1|103941|fgenesh1_pg.C_scaffold_28000052	>jgi|Dappu1|96245|fgenesh1_pg.C_scaffold_4000361	jgi|Dappu1|311404|NCBI_GNO_0400177	>jgi|Dappu1|117735|fgenesh1_pg.C_scaffold_258000001	>jgi|Dappu1|102626|fgenesh1_pg.C_scaffold_22000049
>jgi|Dappu1|103942|fgenesh1_pg.C_scaffold_28000053	>jgi|Dappu1|234770|SNAP_00002828	jgi|Dappu1|311415|NCBI_GNO_0400188	>jgi|Dappu1|117751|fgenesh1_pg.C_scaffold_260000005	>jgi|Dappu1|317807|NCBI_GNO_2200095
>jgi|Dappu1|103943|fgenesh1_pg.C_scaffold_28000054	>jgi|Dappu1|305514|PASA_GEN_0400118	jgi|Dappu1|311417|NCBI_GNO_0400190	>jgi|Dappu1|117760|fgenesh1_pg.C_scaffold_261000006	>jgi|Dappu1|242598|SNAP_00010656
>jgi|Dappu1|103946|fgenesh1_pg.C_scaffold_28000057	>jgi|Dappu1|311600|NCBI_GNO_0400374	jgi|Dappu1|305467|PASA_GEN_0400062	>jgi|Dappu1|117855|fgenesh1_pg.C_scaffold_270000005	>jgi|Dappu1|317827|NCBI_GNO_2200115
>jgi|Dappu1|103968|fgenesh1_pg.C_scaffold_28000079	>jgi|Dappu1|311607|NCBI_GNO_0400381	jgi|Dappu1|234540|SNAP_00002598	>jgi|Dappu1|117866|fgenesh1_pg.C_scaffold_271000006	>jgi|Dappu1|242649|SNAP_00010707
>jgi|Dappu1|104002|fgenesh1_pg.C_scaffold_28000113	>jgi|Dappu1|311608|NCBI_GNO_0400382	jgi|Dappu1|234541|SNAP_00002599	>jgi|Dappu1|117876|fgenesh1_pg.C_scaffold_272000003	>jgi|Dappu1|303608|PASA_GEN_2200021
>jgi|Dappu1|104014|fgenesh1_pg.C_scaffold_28000125	>jgi|Dappu1|311613|NCBI_GNO_0400387	jgi|Dappu1|234546|SNAP_00002604	>jgi|Dappu1|117877|fgenesh1_pg.C_scaffold_272000004	>jgi|Dappu1|317904|NCBI_GNO_2200192
>jgi|Dappu1|104015|fgenesh1_pg.C_scaffold_28000126	>jgi|Dappu1|191862|estExt_Genewise1Plus.C_40607	jgi|Dappu1|234547|SNAP_00002605	>jgi|Dappu1|117905|fgenesh1_pg.C_scaffold_274000011	>jgi|Dappu1|102749|fgenesh1_pg.C_scaffold_22000172
>jgi|Dappu1|104041|fgenesh1_pg.C_scaffold_28000152	>jgi|Dappu1|234781|SNAP_00002839	jgi|Dappu1|311429|NCBI_GNO_0400202	>jgi|Dappu1|117932|fgenesh1_pg.C_scaffold_279000001	>jgi|Dappu1|317949|NCBI_GNO_2200237
>jgi|Dappu1|104063|fgenesh1_pg.C_scaffold_28000174	>jgi|Dappu1|311617|NCBI_GNO_0400391	jgi|Dappu1|234550|SNAP_00002608	>jgi|Dappu1|117945|fgenesh1_pg.C_scaffold_280000006	>jgi|Dappu1|303595|PASA_GEN_2200007
>jgi|Dappu1|104093|fgenesh1_pg.C_scaffold_28000204	>jgi|Dappu1|311618|NCBI_GNO_0400392	jgi|Dappu1|305471|PASA_GEN_0400068	>jgi|Dappu1|118007|fgenesh1_pg.C_scaffold_288000002	>jgi|Dappu1|304983|PASA_GEN_3200007
>jgi|Dappu1|104122|fgenesh1_pg.C_scaffold_29000001	>jgi|Dappu1|311619|NCBI_GNO_0400393	jgi|Dappu1|305472|PASA_GEN_0400069	>jgi|Dappu1|118028|fgenesh1_pg.C_scaffold_290000007	>jgi|Dappu1|319878|NCBI_GNO_3200018
>jgi|Dappu1|104147|fgenesh1_pg.C_scaffold_29000026	>jgi|Dappu1|96275|fgenesh1_pg.C_scaffold_4000391	jgi|Dappu1|305473|PASA_GEN_0400070	>jgi|Dappu1|118041|fgenesh1_pg.C_scaffold_291000010	>jgi|Dappu1|319879|NCBI_GNO_3200019
>jgi|Dappu1|104152|fgenesh1_pg.C_scaffold_29000031	>jgi|Dappu1|234786|SNAP_00002844	jgi|Dappu1|96105|fgenesh1_pg.C_scaffold_4000221	>jgi|Dappu1|118075|fgenesh1_pg.C_scaffold_296000001	>jgi|Dappu1|52875|e_gw1.32.50.1
>jgi|Dappu1|104153|fgenesh1_pg.C_scaffold_29000032	>jgi|Dappu1|234789|SNAP_00002847	jgi|Dappu1|311447|NCBI_GNO_0400220	>jgi|Dappu1|118077|fgenesh1_pg.C_scaffold_296000003	>jgi|Dappu1|52874|e_gw1.32.248.1
>jgi|Dappu1|104167|fgenesh1_pg.C_scaffold_29000046	>jgi|Dappu1|234790|SNAP_00002848	jgi|Dappu1|311453|NCBI_GNO_0400227	>jgi|Dappu1|118079|fgenesh1_pg.C_scaffold_296000005	>jgi|Dappu1|231058|estExt_fgenesh1_kg.C_320002
>jgi|Dappu1|104169|fgenesh1_pg.C_scaffold_29000048	>jgi|Dappu1|234799|SNAP_00002857	jgi|Dappu1|311454|NCBI_GNO_0400228	>jgi|Dappu1|118087|fgenesh1_pg.C_scaffold_298000001	>jgi|Dappu1|305033|PASA_GEN_3200066
>jgi|Dappu1|104176|fgenesh1_pg.C_scaffold_29000055	>jgi|Dappu1|96286|fgenesh1_pg.C_scaffold_4000402	jgi|Dappu1|311457|NCBI_GNO_0400231	>jgi|Dappu1|118108|fgenesh1_pg.C_scaffold_301000001	>jgi|Dappu1|225274|estExt_fgenesh1_pg.C_320057
>jgi|Dappu1|104185|fgenesh1_pg.C_scaffold_29000064	>jgi|Dappu1|96294|fgenesh1_pg.C_scaffold_4000410	jgi|Dappu1|221202|estExt_fgenesh1_pg.C_40232	>jgi|Dappu1|118160|fgenesh1_pg.C_scaffold_309000004	>jgi|Dappu1|104756|fgenesh1_pg.C_scaffold_32000069
>jgi|Dappu1|104187|fgenesh1_pg.C_scaffold_29000066	>jgi|Dappu1|311641|NCBI_GNO_0400415	jgi|Dappu1|311465|NCBI_GNO_0400239	>jgi|Dappu1|118178|fgenesh1_pg.C_scaffold_313000002	>jgi|Dappu1|305003|PASA_GEN_3200030
>jgi|Dappu1|104191|fgenesh1_pg.C_scaffold_29000070	>jgi|Dappu1|96296|fgenesh1_pg.C_scaffold_4000412	jgi|Dappu1|234588|SNAP_00002646	>jgi|Dappu1|118182|fgenesh1_pg.C_scaffold_313000006	>jgi|Dappu1|319969|NCBI_GNO_3200109
>jgi|Dappu1|104193|fgenesh1_pg.C_scaffold_29000072	>jgi|Dappu1|221306|estExt_fgenesh1_pg.C_40414	jgi|Dappu1|234589|SNAP_00002647	>jgi|Dappu1|118205|fgenesh1_pg.C_scaffold_317000001	>jgi|Dappu1|251490|SNAP_00019548
>jgi|Dappu1|104196|fgenesh1_pg.C_scaffold_29000075	>jgi|Dappu1|311650|NCBI_GNO_0400424	jgi|Dappu1|234595|SNAP_00002653	>jgi|Dappu1|118270|fgenesh1_pg.C_scaffold_328000007	>jgi|Dappu1|199744|estExt_Genewise1Plus.C_590007
>jgi|Dappu1|104203|fgenesh1_pg.C_scaffold_29000082	>jgi|Dappu1|305701|PASA_GEN_0400348	jgi|Dappu1|305642|PASA_GEN_0400277	>jgi|Dappu1|118302|fgenesh1_pg.C_scaffold_332000009	>jgi|Dappu1|251524|SNAP_00019582
>jgi|Dappu1|104230|fgenesh1_pg.C_scaffold_29000109	>jgi|Dappu1|305522|PASA_GEN_0400128	jgi|Dappu1|234601|SNAP_00002659	>jgi|Dappu1|118406|fgenesh1_pg.C_scaffold_349000004	>jgi|Dappu1|324074|NCBI_GNO_5900037
>jgi|Dappu1|104231|fgenesh1_pg.C_scaffold_29000110	>jgi|Dappu1|305523|PASA_GEN_0400129	jgi|Dappu1|234609|SNAP_00002667	>jgi|Dappu1|118526|fgenesh1_pg.C_scaffold_363000003	>jgi|Dappu1|17589|gw1.59.94.1
>jgi|Dappu1|104233|fgenesh1_pg.C_scaffold_29000112	>jgi|Dappu1|234827|SNAP_00002885	jgi|Dappu1|234612|SNAP_00002670	>jgi|Dappu1|118566|fgenesh1_pg.C_scaffold_374000009	>jgi|Dappu1|231267|estExt_fgenesh1_kg.C_590004
>jgi|Dappu1|104263|fgenesh1_pg.C_scaffold_29000142	>jgi|Dappu1|96311|fgenesh1_pg.C_scaffold_4000427	jgi|Dappu1|234614|SNAP_00002672	>jgi|Dappu1|118578|fgenesh1_pg.C_scaffold_377000005	>jgi|Dappu1|251601|SNAP_00019659
>jgi|Dappu1|104265|fgenesh1_pg.C_scaffold_29000144	>jgi|Dappu1|230332|estExt_fgenesh1_kg.C_40042	jgi|Dappu1|234615|SNAP_00002673	>jgi|Dappu1|118610|fgenesh1_pg.C_scaffold_385000002	>jgi|Dappu1|251619|SNAP_00019677
>jgi|Dappu1|104313|fgenesh1_pg.C_scaffold_29000192	>jgi|Dappu1|311662|NCBI_GNO_0400436	jgi|Dappu1|234616|SNAP_00002674	>jgi|Dappu1|118651|fgenesh1_pg.C_scaffold_398000005	>jgi|Dappu1|110157|fgenesh1_pg.C_scaffold_72000024
>jgi|Dappu1|104315|fgenesh1_pg.C_scaffold_29000194	>jgi|Dappu1|42066|e_gw1.4.592.1	jgi|Dappu1|96137|fgenesh1_pg.C_scaffold_4000253	>jgi|Dappu1|118692|fgenesh1_pg.C_scaffold_408000003	>jgi|Dappu1|325711|NCBI_GNO_7200077
>jgi|Dappu1|104318|fgenesh1_pg.C_scaffold_29000197	>jgi|Dappu1|311664|NCBI_GNO_0400438	jgi|Dappu1|305492|PASA_GEN_0400091	>jgi|Dappu1|118694|fgenesh1_pg.C_scaffold_409000001	>jgi|Dappu1|253785|SNAP_00021843
>jgi|Dappu1|104329|fgenesh1_pg.C_scaffold_29000208	>jgi|Dappu1|311665|NCBI_GNO_0400439	jgi|Dappu1|96143|fgenesh1_pg.C_scaffold_4000259	>jgi|Dappu1|118716|fgenesh1_pg.C_scaffold_419000004	>jgi|Dappu1|325742|NCBI_GNO_7200108
>jgi|Dappu1|104345|fgenesh1_pg.C_scaffold_29000224	>jgi|Dappu1|234838|SNAP_00002896	jgi|Dappu1|311490|NCBI_GNO_0400264	>jgi|Dappu1|118792|fgenesh1_pg.C_scaffold_445000001	>jgi|Dappu1|325775|NCBI_GNO_7200141
>jgi|Dappu1|104354|fgenesh1_pg.C_scaffold_29000233	>jgi|Dappu1|96323|fgenesh1_pg.C_scaffold_4000439	jgi|Dappu1|234625|SNAP_00002683	>jgi|Dappu1|118874|fgenesh1_pg.C_scaffold_477000002	>jgi|Dappu1|325785|NCBI_GNO_7200151
>jgi|Dappu1|104361|fgenesh1_pg.C_scaffold_30000006	>jgi|Dappu1|230333|estExt_fgenesh1_kg.C_40046	jgi|Dappu1|4688|gw1.4.132.1	>jgi|Dappu1|119008|fgenesh1_pg.C_scaffold_566000002	>jgi|Dappu1|325786|NCBI_GNO_7200152
>jgi|Dappu1|104362|fgenesh1_pg.C_scaffold_30000007	>jgi|Dappu1|234859|SNAP_00002917	jgi|Dappu1|230313|estExt_fgenesh1_kg.C_40023	>jgi|Dappu1|119034|fgenesh1_pg.C_scaffold_574000002	>jgi|Dappu1|253847|SNAP_00021905
>jgi|Dappu1|104363|fgenesh1_pg.C_scaffold_30000008	>jgi|Dappu1|221337|estExt_fgenesh1_pg.C_40461	jgi|Dappu1|96152|fgenesh1_pg.C_scaffold_4000268	>jgi|Dappu1|119091|fgenesh1_pg.C_scaffold_592000004	>jgi|Dappu1|325789|NCBI_GNO_7200155
>jgi|Dappu1|104366|fgenesh1_pg.C_scaffold_30000011	>jgi|Dappu1|305532|PASA_GEN_0400141	jgi|Dappu1|221220|estExt_fgenesh1_pg.C_40269	>jgi|Dappu1|119103|fgenesh1_pg.C_scaffold_597000002	>jgi|Dappu1|222696|estExt_fgenesh1_pg.C_110009
>jgi|Dappu1|104371|fgenesh1_pg.C_scaffold_30000016	>jgi|Dappu1|221339|estExt_fgenesh1_pg.C_40463	jgi|Dappu1|305494|PASA_GEN_0400094	>jgi|Dappu1|119117|fgenesh1_pg.C_scaffold_601000001	>jgi|Dappu1|222698|estExt_fgenesh1_pg.C_110011
>jgi|Dappu1|104383|fgenesh1_pg.C_scaffold_30000028	>jgi|Dappu1|311696|NCBI_GNO_0400470	jgi|Dappu1|305495|PASA_GEN_0400095	>jgi|Dappu1|119123|fgenesh1_pg.C_scaffold_603000003	>jgi|Dappu1|222712|estExt_fgenesh1_pg.C_110045
>jgi|Dappu1|104385|fgenesh1_pg.C_scaffold_30000030	>jgi|Dappu1|311701|NCBI_GNO_0400475	jgi|Dappu1|305650|PASA_GEN_0400287	>jgi|Dappu1|119124|fgenesh1_pg.C_scaffold_603000004	>jgi|Dappu1|92293|fgenesh1_kg.C_scaffold_11000002
>jgi|Dappu1|104387|fgenesh1_pg.C_scaffold_30000032	>jgi|Dappu1|234883|SNAP_00002941	jgi|Dappu1|234666|SNAP_00002724	>jgi|Dappu1|119153|fgenesh1_pg.C_scaffold_613000002	>jgi|Dappu1|300721|PASA_GEN_1100019
>jgi|Dappu1|104419|fgenesh1_pg.C_scaffold_30000064	>jgi|Dappu1|234884|SNAP_00002942	jgi|Dappu1|311514|NCBI_GNO_0400288	>jgi|Dappu1|119154|fgenesh1_pg.C_scaffold_613000003	>jgi|Dappu1|314348|NCBI_GNO_1100055
>jgi|Dappu1|104438|fgenesh1_pg.C_scaffold_30000083	>jgi|Dappu1|96366|fgenesh1_pg.C_scaffold_4000482	jgi|Dappu1|221227|estExt_fgenesh1_pg.C_40282	>jgi|Dappu1|119195|fgenesh1_pg.C_scaffold_629000001	>jgi|Dappu1|314349|NCBI_GNO_1100056
>jgi|Dappu1|104444|fgenesh1_pg.C_scaffold_30000089	>jgi|Dappu1|207089|estExt_Genewise1.C_40756	jgi|Dappu1|311517|NCBI_GNO_0400291	>jgi|Dappu1|119261|fgenesh1_pg.C_scaffold_655000002	>jgi|Dappu1|314357|NCBI_GNO_1100064
>jgi|Dappu1|104470|fgenesh1_pg.C_scaffold_30000115	>jgi|Dappu1|234891|SNAP_00002949	jgi|Dappu1|234676|SNAP_00002734	>jgi|Dappu1|119262|fgenesh1_pg.C_scaffold_655000003	>jgi|Dappu1|209207|estExt_Genewise1.C_110138
>jgi|Dappu1|104472|fgenesh1_pg.C_scaffold_30000117	>jgi|Dappu1|311720|NCBI_GNO_0400495	jgi|Dappu1|96174|fgenesh1_pg.C_scaffold_4000290	>jgi|Dappu1|119323|fgenesh1_pg.C_scaffold_684000001	>jgi|Dappu1|314390|NCBI_GNO_1100097
>jgi|Dappu1|104499|fgenesh1_pg.C_scaffold_30000144	>jgi|Dappu1|96372|fgenesh1_pg.C_scaffold_4000488	jgi|Dappu1|221235|estExt_fgenesh1_pg.C_40292	>jgi|Dappu1|119327|fgenesh1_pg.C_scaffold_685000002	>jgi|Dappu1|222762|estExt_fgenesh1_pg.C_110142
>jgi|Dappu1|104500|fgenesh1_pg.C_scaffold_30000145	>jgi|Dappu1|96377|fgenesh1_pg.C_scaffold_4000493	jgi|Dappu1|234680|SNAP_00002738	>jgi|Dappu1|119328|fgenesh1_pg.C_scaffold_686000001	>jgi|Dappu1|300755|PASA_GEN_1100063
>jgi|Dappu1|104505|fgenesh1_pg.C_scaffold_30000150	>jgi|Dappu1|96379|fgenesh1_pg.C_scaffold_4000495	jgi|Dappu1|305656|PASA_GEN_0400295	>jgi|Dappu1|119365|fgenesh1_pg.C_scaffold_700000002	>jgi|Dappu1|314447|NCBI_GNO_1100155
>jgi|Dappu1|104520|fgenesh1_pg.C_scaffold_30000165	>jgi|Dappu1|234907|SNAP_00002965	jgi|Dappu1|305500|PASA_GEN_0400100	>jgi|Dappu1|119394|fgenesh1_pg.C_scaffold_712000002	>jgi|Dappu1|222793|estExt_fgenesh1_pg.C_110198
>jgi|Dappu1|104526|fgenesh1_pg.C_scaffold_30000171	>jgi|Dappu1|234909|SNAP_00002967	jgi|Dappu1|234686|SNAP_00002744	>jgi|Dappu1|119424|fgenesh1_pg.C_scaffold_734000002	>jgi|Dappu1|99275|fgenesh1_pg.C_scaffold_11000204
>jgi|Dappu1|104528|fgenesh1_pg.C_scaffold_30000173	>jgi|Dappu1|96392|fgenesh1_pg.C_scaffold_4000508	jgi|Dappu1|96187|fgenesh1_pg.C_scaffold_4000303	>jgi|Dappu1|119450|fgenesh1_pg.C_scaffold_751000001	>jgi|Dappu1|230579|estExt_fgenesh1_kg.C_110019
>jgi|Dappu1|104533|fgenesh1_pg.C_scaffold_30000178	>jgi|Dappu1|96393|fgenesh1_pg.C_scaffold_4000509	jgi|Dappu1|221246|estExt_fgenesh1_pg.C_40304	>jgi|Dappu1|119457|fgenesh1_pg.C_scaffold_760000001	>jgi|Dappu1|99313|fgenesh1_pg.C_scaffold_11000242
>jgi|Dappu1|104537|fgenesh1_pg.C_scaffold_30000182	>jgi|Dappu1|234919|SNAP_00002977	jgi|Dappu1|305658|PASA_GEN_0400297	>jgi|Dappu1|119490|fgenesh1_pg.C_scaffold_772000002	>jgi|Dappu1|99314|fgenesh1_pg.C_scaffold_11000243
>jgi|Dappu1|104556|fgenesh1_pg.C_scaffold_31000019	>jgi|Dappu1|311745|NCBI_GNO_0400520	jgi|Dappu1|221249|estExt_fgenesh1_pg.C_40308	>jgi|Dappu1|119532|fgenesh1_pg.C_scaffold_791000002	>jgi|Dappu1|238415|SNAP_00006473
>jgi|Dappu1|104560|fgenesh1_pg.C_scaffold_31000023	>jgi|Dappu1|42232|e_gw1.4.975.1	jgi|Dappu1|42520|e_gw1.4.131.1	>jgi|Dappu1|119550|fgenesh1_pg.C_scaffold_802000003	>jgi|Dappu1|314512|NCBI_GNO_1100220
>jgi|Dappu1|104561|fgenesh1_pg.C_scaffold_31000024	>jgi|Dappu1|311748|NCBI_GNO_0400523	jgi|Dappu1|96196|fgenesh1_pg.C_scaffold_4000312	>jgi|Dappu1|119559|fgenesh1_pg.C_scaffold_809000001	>jgi|Dappu1|314556|NCBI_GNO_1100265
>jgi|Dappu1|104583|fgenesh1_pg.C_scaffold_31000046	>jgi|Dappu1|311751|NCBI_GNO_0400526	jgi|Dappu1|305505|PASA_GEN_0400106	>jgi|Dappu1|119650|fgenesh1_pg.C_scaffold_861000001	>jgi|Dappu1|46346|e_gw1.11.135.1
>jgi|Dappu1|104587|fgenesh1_pg.C_scaffold_31000050	>jgi|Dappu1|311758|NCBI_GNO_0400533	jgi|Dappu1|234700|SNAP_00002758	>jgi|Dappu1|119677|fgenesh1_pg.C_scaffold_875000001	>jgi|Dappu1|222859|estExt_fgenesh1_pg.C_110313
>jgi|Dappu1|104588|fgenesh1_pg.C_scaffold_31000051	>jgi|Dappu1|311759|NCBI_GNO_0400534	jgi|Dappu1|311548|NCBI_GNO_0400322	>jgi|Dappu1|119745|fgenesh1_pg.C_scaffold_910000004	>jgi|Dappu1|309160|PASA_GEN_9000036
>jgi|Dappu1|104595|fgenesh1_pg.C_scaffold_31000058	>jgi|Dappu1|234950|SNAP_00003008	jgi|Dappu1|234702|SNAP_00002760	>jgi|Dappu1|119760|fgenesh1_pg.C_scaffold_924000004	>jgi|Dappu1|25925|gw1.90.150.1
>jgi|Dappu1|104597|fgenesh1_pg.C_scaffold_31000060	>jgi|Dappu1|221366|estExt_fgenesh1_pg.C_40536	jgi|Dappu1|96205|fgenesh1_pg.C_scaffold_4000321	>jgi|Dappu1|119845|fgenesh1_pg.C_scaffold_993000002	>jgi|Dappu1|327371|NCBI_GNO_9000042
>jgi|Dappu1|104605|fgenesh1_pg.C_scaffold_31000068	>jgi|Dappu1|96431|fgenesh1_pg.C_scaffold_4000547	jgi|Dappu1|234710|SNAP_00002768	>jgi|Dappu1|119850|fgenesh1_pg.C_scaffold_999000001	>jgi|Dappu1|111953|fgenesh1_pg.C_scaffold_90000041
>jgi|Dappu1|104611|fgenesh1_pg.C_scaffold_31000074	>jgi|Dappu1|96436|fgenesh1_pg.C_scaffold_4000552	jgi|Dappu1|305507|PASA_GEN_0400108	>jgi|Dappu1|119874|fgenesh1_pg.C_scaffold_1012000002	>jgi|Dappu1|111972|fgenesh1_pg.C_scaffold_90000060
>jgi|Dappu1|104614|fgenesh1_pg.C_scaffold_31000077	>jgi|Dappu1|305553|PASA_GEN_0400167	jgi|Dappu1|25900|gw1.4.644.1	>jgi|Dappu1|119886|fgenesh1_pg.C_scaffold_1023000002	>jgi|Dappu1|111979|fgenesh1_pg.C_scaffold_90000067
>jgi|Dappu1|104615|fgenesh1_pg.C_scaffold_31000078	>jgi|Dappu1|234972|SNAP_00003030	jgi|Dappu1|305509|PASA_GEN_0400110	>jgi|Dappu1|119892|fgenesh1_pg.C_scaffold_1028000001	>jgi|Dappu1|256065|SNAP_00024123
>jgi|Dappu1|104617|fgenesh1_pg.C_scaffold_31000080	>jgi|Dappu1|311779|NCBI_GNO_0400554	jgi|Dappu1|305510|PASA_GEN_0400111	>jgi|Dappu1|119900|fgenesh1_pg.C_scaffold_1034000001	>jgi|Dappu1|309156|PASA_GEN_9000032
>jgi|Dappu1|104629|fgenesh1_pg.C_scaffold_31000092	>jgi|Dappu1|96441|fgenesh1_pg.C_scaffold_4000557	jgi|Dappu1|234740|SNAP_00002798	>jgi|Dappu1|119963|fgenesh1_pg.C_scaffold_1068000001	>jgi|Dappu1|309157|PASA_GEN_9000033
>jgi|Dappu1|104631|fgenesh1_pg.C_scaffold_31000094	>jgi|Dappu1|230342|estExt_fgenesh1_kg.C_40055	jgi|Dappu1|311574|NCBI_GNO_0400348	>jgi|Dappu1|120045|fgenesh1_pg.C_scaffold_1120000001	>jgi|Dappu1|309158|PASA_GEN_9000034
>jgi|Dappu1|104632|fgenesh1_pg.C_scaffold_31000095	>jgi|Dappu1|305555|PASA_GEN_0400169	jgi|Dappu1|234744|SNAP_00002802	>jgi|Dappu1|120051|fgenesh1_pg.C_scaffold_1123000001	>jgi|Dappu1|324127|NCBI_GNO_6000001
>jgi|Dappu1|104634|fgenesh1_pg.C_scaffold_31000097	>jgi|Dappu1|96467|fgenesh1_pg.C_scaffold_4000583	jgi|Dappu1|311577|NCBI_GNO_0400351	>jgi|Dappu1|120082|fgenesh1_pg.C_scaffold_1142000002	>jgi|Dappu1|108672|fgenesh1_pg.C_scaffold_60000025
>jgi|Dappu1|104636|fgenesh1_pg.C_scaffold_31000099	>jgi|Dappu1|42631|e_gw1.4.953.1	jgi|Dappu1|311579|NCBI_GNO_0400353	>jgi|Dappu1|120083|fgenesh1_pg.C_scaffold_1144000001	>jgi|Dappu1|251675|SNAP_00019733
>jgi|Dappu1|104637|fgenesh1_pg.C_scaffold_31000100	>jgi|Dappu1|311808|NCBI_GNO_0400583	jgi|Dappu1|305680|PASA_GEN_0400322	>jgi|Dappu1|120119|fgenesh1_pg.C_scaffold_1170000001	>jgi|Dappu1|251696|SNAP_00019754
>jgi|Dappu1|104638|fgenesh1_pg.C_scaffold_31000101	>jgi|Dappu1|235009|SNAP_00003067	jgi|Dappu1|305681|PASA_GEN_0400323	>jgi|Dappu1|120124|fgenesh1_pg.C_scaffold_1174000002	>jgi|Dappu1|324187|NCBI_GNO_6000063
>jgi|Dappu1|104643|fgenesh1_pg.C_scaffold_31000106	>jgi|Dappu1|305563|PASA_GEN_0400179	jgi|Dappu1|96245|fgenesh1_pg.C_scaffold_4000361	>jgi|Dappu1|120176|fgenesh1_pg.C_scaffold_1215000001	>jgi|Dappu1|251700|SNAP_00019758
>jgi|Dappu1|104646|fgenesh1_pg.C_scaffold_31000109	>jgi|Dappu1|96503|fgenesh1_pg.C_scaffold_4000619	jgi|Dappu1|234770|SNAP_00002828	>jgi|Dappu1|120196|fgenesh1_pg.C_scaffold_1234000001	>jgi|Dappu1|251701|SNAP_00019759
>jgi|Dappu1|104649|fgenesh1_pg.C_scaffold_31000112	>jgi|Dappu1|96505|fgenesh1_pg.C_scaffold_4000621	jgi|Dappu1|305514|PASA_GEN_0400118	>jgi|Dappu1|120237|fgenesh1_pg.C_scaffold_1260000002	>jgi|Dappu1|226653|estExt_fgenesh1_pg.C_600109
>jgi|Dappu1|104650|fgenesh1_pg.C_scaffold_31000113	>jgi|Dappu1|96940|fgenesh1_pg.C_scaffold_6000007	jgi|Dappu1|311600|NCBI_GNO_0400374	>jgi|Dappu1|120246|fgenesh1_pg.C_scaffold_1269000001	>jgi|Dappu1|307231|PASA_GEN_6000072
>jgi|Dappu1|104652|fgenesh1_pg.C_scaffold_31000115	>jgi|Dappu1|235531|SNAP_00003589	jgi|Dappu1|234773|SNAP_00002831	>jgi|Dappu1|120254|fgenesh1_pg.C_scaffold_1276000002	>jgi|Dappu1|251767|SNAP_00019825
>jgi|Dappu1|104670|fgenesh1_pg.C_scaffold_31000133	>jgi|Dappu1|92123|fgenesh1_kg.C_scaffold_6000002	jgi|Dappu1|311607|NCBI_GNO_0400381	>jgi|Dappu1|120268|fgenesh1_pg.C_scaffold_1292000001	>jgi|Dappu1|307233|PASA_GEN_6000074
>jgi|Dappu1|104677|fgenesh1_pg.C_scaffold_31000140	>jgi|Dappu1|96952|fgenesh1_pg.C_scaffold_6000019	jgi|Dappu1|311608|NCBI_GNO_0400382	>jgi|Dappu1|120275|fgenesh1_pg.C_scaffold_1298000003	>jgi|Dappu1|303814|PASA_GEN_2400001
>jgi|Dappu1|104683|fgenesh1_pg.C_scaffold_31000146	>jgi|Dappu1|312222|NCBI_GNO_0600018	jgi|Dappu1|311613|NCBI_GNO_0400387	>jgi|Dappu1|120296|fgenesh1_pg.C_scaffold_1320000003	>jgi|Dappu1|303887|PASA_GEN_2400096
>jgi|Dappu1|104684|fgenesh1_pg.C_scaffold_31000147	>jgi|Dappu1|312223|NCBI_GNO_0600019	jgi|Dappu1|191862|estExt_Genewise1Plus.C_40607	>jgi|Dappu1|120305|fgenesh1_pg.C_scaffold_1324000001	>jgi|Dappu1|318197|NCBI_GNO_2400021
>jgi|Dappu1|104687|fgenesh1_pg.C_scaffold_31000150	>jgi|Dappu1|312225|NCBI_GNO_0600021	jgi|Dappu1|234781|SNAP_00002839	>jgi|Dappu1|120328|fgenesh1_pg.C_scaffold_1344000001	>jgi|Dappu1|318199|NCBI_GNO_2400023
>jgi|Dappu1|104710|fgenesh1_pg.C_scaffold_32000023	>jgi|Dappu1|312226|NCBI_GNO_0600022	jgi|Dappu1|311617|NCBI_GNO_0400391	>jgi|Dappu1|120347|fgenesh1_pg.C_scaffold_1369000001	>jgi|Dappu1|103009|fgenesh1_pg.C_scaffold_24000036
>jgi|Dappu1|104723|fgenesh1_pg.C_scaffold_32000036	>jgi|Dappu1|235547|SNAP_00003605	jgi|Dappu1|311618|NCBI_GNO_0400392	>jgi|Dappu1|120367|fgenesh1_pg.C_scaffold_1394000001	>jgi|Dappu1|243157|SNAP_00011215
>jgi|Dappu1|104730|fgenesh1_pg.C_scaffold_32000043	>jgi|Dappu1|235549|SNAP_00003607	jgi|Dappu1|311619|NCBI_GNO_0400393	>jgi|Dappu1|120393|fgenesh1_pg.C_scaffold_1417000001	>jgi|Dappu1|243162|SNAP_00011220
>jgi|Dappu1|104732|fgenesh1_pg.C_scaffold_32000045	>jgi|Dappu1|96961|fgenesh1_pg.C_scaffold_6000028	jgi|Dappu1|96275|fgenesh1_pg.C_scaffold_4000391	>jgi|Dappu1|120448|fgenesh1_pg.C_scaffold_1468000001	>jgi|Dappu1|318222|NCBI_GNO_2400046
>jgi|Dappu1|104734|fgenesh1_pg.C_scaffold_32000047	>jgi|Dappu1|235552|SNAP_00003610	jgi|Dappu1|234786|SNAP_00002844	>jgi|Dappu1|120453|fgenesh1_pg.C_scaffold_1473000001	>jgi|Dappu1|50878|e_gw1.24.297.1
>jgi|Dappu1|104736|fgenesh1_pg.C_scaffold_32000049	>jgi|Dappu1|96978|fgenesh1_pg.C_scaffold_6000045	jgi|Dappu1|234789|SNAP_00002847	>jgi|Dappu1|120465|fgenesh1_pg.C_scaffold_1483000002	>jgi|Dappu1|318232|NCBI_GNO_2400056
>jgi|Dappu1|104768|fgenesh1_pg.C_scaffold_32000081	>jgi|Dappu1|312252|NCBI_GNO_0600048	jgi|Dappu1|234790|SNAP_00002848	>jgi|Dappu1|120477|fgenesh1_pg.C_scaffold_1496000001	>jgi|Dappu1|318241|NCBI_GNO_2400065
>jgi|Dappu1|104773|fgenesh1_pg.C_scaffold_32000086	>jgi|Dappu1|307044|PASA_GEN_0600014	jgi|Dappu1|234791|SNAP_00002849	>jgi|Dappu1|120484|fgenesh1_pg.C_scaffold_1504000001	>jgi|Dappu1|243206|SNAP_00011264
>jgi|Dappu1|104783|fgenesh1_pg.C_scaffold_32000096	>jgi|Dappu1|235574|SNAP_00003632	jgi|Dappu1|234792|SNAP_00002850	>jgi|Dappu1|120542|fgenesh1_pg.C_scaffold_1563000001	>jgi|Dappu1|303826|PASA_GEN_2400016
>jgi|Dappu1|104786|fgenesh1_pg.C_scaffold_32000099	>jgi|Dappu1|235575|SNAP_00003633	jgi|Dappu1|234799|SNAP_00002857	>jgi|Dappu1|120618|fgenesh1_pg.C_scaffold_1630000002	>jgi|Dappu1|303840|PASA_GEN_2400035
>jgi|Dappu1|104787|fgenesh1_pg.C_scaffold_32000100	>jgi|Dappu1|235601|SNAP_00003659	jgi|Dappu1|96286|fgenesh1_pg.C_scaffold_4000402	>jgi|Dappu1|120630|fgenesh1_pg.C_scaffold_1643000001	>jgi|Dappu1|318296|NCBI_GNO_2400121
>jgi|Dappu1|104822|fgenesh1_pg.C_scaffold_32000135	>jgi|Dappu1|235608|SNAP_00003666	jgi|Dappu1|96294|fgenesh1_pg.C_scaffold_4000410	>jgi|Dappu1|120702|fgenesh1_pg.C_scaffold_1723000001	>jgi|Dappu1|303857|PASA_GEN_2400053
>jgi|Dappu1|104825|fgenesh1_pg.C_scaffold_32000138	>jgi|Dappu1|235609|SNAP_00003667	jgi|Dappu1|311641|NCBI_GNO_0400415	>jgi|Dappu1|120740|fgenesh1_pg.C_scaffold_1780000001	>jgi|Dappu1|103164|fgenesh1_pg.C_scaffold_24000191
>jgi|Dappu1|104836|fgenesh1_pg.C_scaffold_33000005	>jgi|Dappu1|97016|fgenesh1_pg.C_scaffold_6000083	jgi|Dappu1|96296|fgenesh1_pg.C_scaffold_4000412	>jgi|Dappu1|120943|fgenesh1_pg.C_scaffold_2045000001	>jgi|Dappu1|303864|PASA_GEN_2400062
>jgi|Dappu1|104843|fgenesh1_pg.C_scaffold_33000012	>jgi|Dappu1|235613|SNAP_00003671	jgi|Dappu1|96297|fgenesh1_pg.C_scaffold_4000413	>jgi|Dappu1|121080|fgenesh1_pg.C_scaffold_2230000001	>jgi|Dappu1|224569|estExt_fgenesh1_pg.C_240192
>jgi|Dappu1|104846|fgenesh1_pg.C_scaffold_33000015	>jgi|Dappu1|235619|SNAP_00003677	jgi|Dappu1|305697|PASA_GEN_0400344	>jgi|Dappu1|121118|fgenesh1_pg.C_scaffold_2274000001	>jgi|Dappu1|318368|NCBI_GNO_2400193
>jgi|Dappu1|104852|fgenesh1_pg.C_scaffold_33000021	>jgi|Dappu1|235623|SNAP_00003681	jgi|Dappu1|221306|estExt_fgenesh1_pg.C_40414	>jgi|Dappu1|121279|fgenesh1_pg.C_scaffold_2486000001	>jgi|Dappu1|318384|NCBI_GNO_2400209
>jgi|Dappu1|104856|fgenesh1_pg.C_scaffold_33000025	>jgi|Dappu1|235624|SNAP_00003682	jgi|Dappu1|305698|PASA_GEN_0400345	>jgi|Dappu1|121415|fgenesh1_pg.C_scaffold_2696000001	>jgi|Dappu1|318386|NCBI_GNO_2400211
>jgi|Dappu1|104864|fgenesh1_pg.C_scaffold_33000033	>jgi|Dappu1|235629|SNAP_00003687	jgi|Dappu1|311650|NCBI_GNO_0400424	>jgi|Dappu1|121530|fgenesh1_pg.C_scaffold_2867000002	>jgi|Dappu1|243398|SNAP_00011456
>jgi|Dappu1|104869|fgenesh1_pg.C_scaffold_33000038	>jgi|Dappu1|312298|NCBI_GNO_0600096	jgi|Dappu1|305701|PASA_GEN_0400348	>jgi|Dappu1|121651|fgenesh1_pg.C_scaffold_3049000001	>jgi|Dappu1|318420|NCBI_GNO_2400246
>jgi|Dappu1|104873|fgenesh1_pg.C_scaffold_33000042	>jgi|Dappu1|312300|NCBI_GNO_0600098	jgi|Dappu1|305522|PASA_GEN_0400128	>jgi|Dappu1|122319|fgenesh1_pg.C_scaffold_4059000001	>jgi|Dappu1|226060|estExt_fgenesh1_pg.C_470008
>jgi|Dappu1|104884|fgenesh1_pg.C_scaffold_33000053	>jgi|Dappu1|97041|fgenesh1_pg.C_scaffold_6000108	jgi|Dappu1|305523|PASA_GEN_0400129	>jgi|Dappu1|122378|fgenesh1_pg.C_scaffold_4176000002	>jgi|Dappu1|249096|SNAP_00017154
>jgi|Dappu1|104885|fgenesh1_pg.C_scaffold_33000054	>jgi|Dappu1|312303|NCBI_GNO_0600101	jgi|Dappu1|234827|SNAP_00002885	>jgi|Dappu1|122414|fgenesh1_pg.C_scaffold_4250000001	>jgi|Dappu1|226079|estExt_fgenesh1_pg.C_470044
>jgi|Dappu1|104888|fgenesh1_pg.C_scaffold_33000057	>jgi|Dappu1|97049|fgenesh1_pg.C_scaffold_6000116	jgi|Dappu1|96311|fgenesh1_pg.C_scaffold_4000427	>jgi|Dappu1|122415|fgenesh1_pg.C_scaffold_4251000001	>jgi|Dappu1|322437|NCBI_GNO_4700041
>jgi|Dappu1|104890|fgenesh1_pg.C_scaffold_33000059	>jgi|Dappu1|235651|SNAP_00003709	jgi|Dappu1|230332|estExt_fgenesh1_kg.C_40042	>jgi|Dappu1|122499|fgenesh1_pg.C_scaffold_4423000001	>jgi|Dappu1|107122|fgenesh1_pg.C_scaffold_47000064
>jgi|Dappu1|104899|fgenesh1_pg.C_scaffold_33000068	>jgi|Dappu1|235652|SNAP_00003710	jgi|Dappu1|311662|NCBI_GNO_0400436	>jgi|Dappu1|122545|fgenesh1_pg.C_scaffold_4542000001	>jgi|Dappu1|322458|NCBI_GNO_4700062
>jgi|Dappu1|104901|fgenesh1_pg.C_scaffold_33000070	>jgi|Dappu1|235658|SNAP_00003716	jgi|Dappu1|42066|e_gw1.4.592.1	>jgi|Dappu1|122634|fgenesh1_pg.C_scaffold_4766000001	>jgi|Dappu1|306215|PASA_GEN_4700029
>jgi|Dappu1|104909|fgenesh1_pg.C_scaffold_33000078	>jgi|Dappu1|97062|fgenesh1_pg.C_scaffold_6000129	jgi|Dappu1|311664|NCBI_GNO_0400438	>jgi|Dappu1|122641|fgenesh1_pg.C_scaffold_4795000001	>jgi|Dappu1|226094|estExt_fgenesh1_pg.C_470070
>jgi|Dappu1|104913|fgenesh1_pg.C_scaffold_33000082	>jgi|Dappu1|312329|NCBI_GNO_0600127	jgi|Dappu1|311665|NCBI_GNO_0400439	>jgi|Dappu1|122643|fgenesh1_pg.C_scaffold_4798000001	>jgi|Dappu1|306248|PASA_GEN_4700055
>jgi|Dappu1|104914|fgenesh1_pg.C_scaffold_33000083	>jgi|Dappu1|307119|PASA_GEN_0600064	jgi|Dappu1|234838|SNAP_00002896	>jgi|Dappu1|122704|fgenesh1_pg.C_scaffold_5080000001	>jgi|Dappu1|226107|estExt_fgenesh1_pg.C_470086
>jgi|Dappu1|104916|fgenesh1_pg.C_scaffold_33000085	>jgi|Dappu1|235672|SNAP_00003730	jgi|Dappu1|96323|fgenesh1_pg.C_scaffold_4000439	>jgi|Dappu1|122715|fgenesh1_pg.C_scaffold_5112000001	>jgi|Dappu1|107161|fgenesh1_pg.C_scaffold_47000103
>jgi|Dappu1|104917|fgenesh1_pg.C_scaffold_33000086	>jgi|Dappu1|235674|SNAP_00003732	jgi|Dappu1|230333|estExt_fgenesh1_kg.C_40046	>jgi|Dappu1|122726|fgenesh1_pg.C_scaffold_5147000002	>jgi|Dappu1|306616|PASA_GEN_5100007
>jgi|Dappu1|104920|fgenesh1_pg.C_scaffold_33000089	>jgi|Dappu1|235675|SNAP_00003733	jgi|Dappu1|221336|estExt_fgenesh1_pg.C_40459	>jgi|Dappu1|122787|fgenesh1_pg.C_scaffold_5429000002	>jgi|Dappu1|306666|PASA_GEN_5100066
>jgi|Dappu1|104926|fgenesh1_pg.C_scaffold_33000095	>jgi|Dappu1|97078|fgenesh1_pg.C_scaffold_6000145	jgi|Dappu1|234859|SNAP_00002917	>jgi|Dappu1|123629|fgenesh1_pg.C_scaffold_7472000001	>jgi|Dappu1|323030|NCBI_GNO_5100070
>jgi|Dappu1|104933|fgenesh1_pg.C_scaffold_33000102	>jgi|Dappu1|97084|fgenesh1_pg.C_scaffold_6000151	jgi|Dappu1|221337|estExt_fgenesh1_pg.C_40461	>jgi|Dappu1|123698|fgenesh1_pg.C_scaffold_7654000001	>jgi|Dappu1|55687|e_gw1.51.54.1
>jgi|Dappu1|104935|fgenesh1_pg.C_scaffold_33000104	>jgi|Dappu1|235695|SNAP_00003753	jgi|Dappu1|305532|PASA_GEN_0400141	>jgi|Dappu1|123921|fgenesh1_pg.C_scaffold_8551000001	>jgi|Dappu1|323032|NCBI_GNO_5100072
>jgi|Dappu1|104936|fgenesh1_pg.C_scaffold_33000105	>jgi|Dappu1|235696|SNAP_00003754	jgi|Dappu1|221339|estExt_fgenesh1_pg.C_40463	>jgi|Dappu1|124195|fgenesh1_pg.C_scaffold_9330000001	>jgi|Dappu1|107621|fgenesh1_pg.C_scaffold_51000081
>jgi|Dappu1|104939|fgenesh1_pg.C_scaffold_33000108	>jgi|Dappu1|235697|SNAP_00003755	jgi|Dappu1|221341|estExt_fgenesh1_pg.C_40465	>jgi|Dappu1|124365|fgenesh1_pg.C_scaffold_9849000001	>jgi|Dappu1|107627|fgenesh1_pg.C_scaffold_51000087
>jgi|Dappu1|104941|fgenesh1_pg.C_scaffold_33000110	>jgi|Dappu1|235698|SNAP_00003756	jgi|Dappu1|311696|NCBI_GNO_0400470	>jgi|Dappu1|124601|fgenesh1_pg.C_scaffold_10422000001	>jgi|Dappu1|306634|PASA_GEN_5100027
>jgi|Dappu1|104942|fgenesh1_pg.C_scaffold_33000111	>jgi|Dappu1|235707|SNAP_00003765	jgi|Dappu1|311701|NCBI_GNO_0400475	>jgi|Dappu1|125559|fgenesh1_pg.C_scaffold_12765000001	>jgi|Dappu1|226256|estExt_fgenesh1_pg.C_510104
>jgi|Dappu1|104943|fgenesh1_pg.C_scaffold_33000112	>jgi|Dappu1|312367|NCBI_GNO_0600166	jgi|Dappu1|234874|SNAP_00002932	>jgi|Dappu1|126524|fgenesh1_pg.C_scaffold_15292000001	>jgi|Dappu1|323067|NCBI_GNO_5100107
>jgi|Dappu1|104959|fgenesh1_pg.C_scaffold_33000128	>jgi|Dappu1|97099|fgenesh1_pg.C_scaffold_6000166	jgi|Dappu1|96359|fgenesh1_pg.C_scaffold_4000475	>jgi|Dappu1|127266|fgenesh1_pm.C_scaffold_6000080	>jgi|Dappu1|323073|NCBI_GNO_5100113
>jgi|Dappu1|104970|fgenesh1_pg.C_scaffold_33000139	>jgi|Dappu1|312373|NCBI_GNO_0600172	jgi|Dappu1|305534|PASA_GEN_0400144	>jgi|Dappu1|127554|fgenesh1_pm.C_scaffold_9000061	>jgi|Dappu1|323093|NCBI_GNO_5100133
>jgi|Dappu1|104979|fgenesh1_pg.C_scaffold_33000148	>jgi|Dappu1|235717|SNAP_00003775	jgi|Dappu1|234883|SNAP_00002941	>jgi|Dappu1|127734|fgenesh1_pm.C_scaffold_12000010	>jgi|Dappu1|323098|NCBI_GNO_5100138
>jgi|Dappu1|104980|fgenesh1_pg.C_scaffold_33000149	>jgi|Dappu1|312376|NCBI_GNO_0600175	jgi|Dappu1|234884|SNAP_00002942	>jgi|Dappu1|128029|fgenesh1_pm.C_scaffold_17000029	>jgi|Dappu1|323100|NCBI_GNO_5100140
>jgi|Dappu1|104981|fgenesh1_pg.C_scaffold_33000150	>jgi|Dappu1|235718|SNAP_00003776	jgi|Dappu1|96366|fgenesh1_pg.C_scaffold_4000482	>jgi|Dappu1|128385|fgenesh1_pm.C_scaffold_25000035	>jgi|Dappu1|315704|NCBI_GNO_1500052
>jgi|Dappu1|104992|fgenesh1_pg.C_scaffold_34000001	>jgi|Dappu1|235719|SNAP_00003777	jgi|Dappu1|207089|estExt_Genewise1.C_40756	>jgi|Dappu1|129309|fgenesh1_pm.C_scaffold_65000009	>jgi|Dappu1|4935|gw1.15.119.1
>jgi|Dappu1|104994|fgenesh1_pg.C_scaffold_34000003	>jgi|Dappu1|97108|fgenesh1_pg.C_scaffold_6000175	jgi|Dappu1|234891|SNAP_00002949	>jgi|Dappu1|130102|fgenesh1_pm.C_scaffold_121000020	>jgi|Dappu1|315758|NCBI_GNO_1500106
>jgi|Dappu1|105003|fgenesh1_pg.C_scaffold_34000012	>jgi|Dappu1|97109|fgenesh1_pg.C_scaffold_6000176	jgi|Dappu1|311720|NCBI_GNO_0400495	>jgi|Dappu1|130278|fgenesh1_pm.C_scaffold_162000001	>jgi|Dappu1|100563|fgenesh1_pg.C_scaffold_15000128
>jgi|Dappu1|105007|fgenesh1_pg.C_scaffold_34000016	>jgi|Dappu1|312379|NCBI_GNO_0600178	jgi|Dappu1|234893|SNAP_00002951	>jgi|Dappu1|130340|fgenesh1_pm.C_scaffold_177000002	>jgi|Dappu1|315773|NCBI_GNO_1500121
>jgi|Dappu1|105013|fgenesh1_pg.C_scaffold_34000022	>jgi|Dappu1|235727|SNAP_00003785	jgi|Dappu1|96372|fgenesh1_pg.C_scaffold_4000488	>jgi|Dappu1|130537|fgenesh1_pm.C_scaffold_289000001	>jgi|Dappu1|301929|PASA_GEN_1500146
>jgi|Dappu1|105015|fgenesh1_pg.C_scaffold_34000024	>jgi|Dappu1|97119|fgenesh1_pg.C_scaffold_6000186	jgi|Dappu1|96377|fgenesh1_pg.C_scaffold_4000493	>jgi|Dappu1|13230|gw1.356.11.1	>jgi|Dappu1|230689|estExt_fgenesh1_kg.C_150016
>jgi|Dappu1|105016|fgenesh1_pg.C_scaffold_34000025	>jgi|Dappu1|235732|SNAP_00003790	jgi|Dappu1|96378|fgenesh1_pg.C_scaffold_4000494	>jgi|Dappu1|13307|gw1.105.22.1	>jgi|Dappu1|315782|NCBI_GNO_1500130
>jgi|Dappu1|105022|fgenesh1_pg.C_scaffold_34000031	>jgi|Dappu1|235733|SNAP_00003791	jgi|Dappu1|96379|fgenesh1_pg.C_scaffold_4000495	>jgi|Dappu1|13495|gw1.72.110.1	>jgi|Dappu1|315783|NCBI_GNO_1500131
>jgi|Dappu1|105027|fgenesh1_pg.C_scaffold_34000036	>jgi|Dappu1|235738|SNAP_00003796	jgi|Dappu1|234907|SNAP_00002965	>jgi|Dappu1|13622|gw1.155.20.1	>jgi|Dappu1|315787|NCBI_GNO_1500135
>jgi|Dappu1|105030|fgenesh1_pg.C_scaffold_34000039	>jgi|Dappu1|235739|SNAP_00003797	jgi|Dappu1|234909|SNAP_00002967	>jgi|Dappu1|13713|gw1.68.21.1	>jgi|Dappu1|301858|PASA_GEN_1500053
>jgi|Dappu1|105034|fgenesh1_pg.C_scaffold_34000043	>jgi|Dappu1|235740|SNAP_00003798	jgi|Dappu1|96392|fgenesh1_pg.C_scaffold_4000508	>jgi|Dappu1|14039|gw1.96.37.1	>jgi|Dappu1|240087|SNAP_00008145
>jgi|Dappu1|105042|fgenesh1_pg.C_scaffold_34000051	>jgi|Dappu1|235751|SNAP_00003809	jgi|Dappu1|96393|fgenesh1_pg.C_scaffold_4000509	>jgi|Dappu1|14302|gw1.50.27.1	>jgi|Dappu1|301859|PASA_GEN_1500054
>jgi|Dappu1|105044|fgenesh1_pg.C_scaffold_34000053	>jgi|Dappu1|235752|SNAP_00003810	jgi|Dappu1|234919|SNAP_00002977	>jgi|Dappu1|14305|gw1.477.1.1	>jgi|Dappu1|301866|PASA_GEN_1500061
>jgi|Dappu1|105045|fgenesh1_pg.C_scaffold_34000054	>jgi|Dappu1|312415|NCBI_GNO_0600214	jgi|Dappu1|311745|NCBI_GNO_0400520	>jgi|Dappu1|14321|gw1.332.19.1	>jgi|Dappu1|100620|fgenesh1_pg.C_scaffold_15000185
>jgi|Dappu1|105046|fgenesh1_pg.C_scaffold_34000055	>jgi|Dappu1|235764|SNAP_00003822	jgi|Dappu1|42232|e_gw1.4.975.1	>jgi|Dappu1|14361|gw1.3.311.1	>jgi|Dappu1|100622|fgenesh1_pg.C_scaffold_15000187
>jgi|Dappu1|105047|fgenesh1_pg.C_scaffold_34000056	>jgi|Dappu1|235765|SNAP_00003823	jgi|Dappu1|311748|NCBI_GNO_0400523	>jgi|Dappu1|14446|gw1.252.8.1	>jgi|Dappu1|315864|NCBI_GNO_1500212
>jgi|Dappu1|105048|fgenesh1_pg.C_scaffold_34000057	>jgi|Dappu1|235766|SNAP_00003824	jgi|Dappu1|311751|NCBI_GNO_0400526	>jgi|Dappu1|14448|gw1.71.20.1	>jgi|Dappu1|223447|estExt_fgenesh1_pg.C_150242
>jgi|Dappu1|105049|fgenesh1_pg.C_scaffold_34000058	>jgi|Dappu1|235767|SNAP_00003825	jgi|Dappu1|311758|NCBI_GNO_0400533	>jgi|Dappu1|14460|gw1.253.11.1	>jgi|Dappu1|230702|estExt_fgenesh1_kg.C_150029
>jgi|Dappu1|105050|fgenesh1_pg.C_scaffold_34000059	>jgi|Dappu1|235768|SNAP_00003826	jgi|Dappu1|311759|NCBI_GNO_0400534	>jgi|Dappu1|14513|gw1.126.21.1	>jgi|Dappu1|315898|NCBI_GNO_1500246
>jgi|Dappu1|105059|fgenesh1_pg.C_scaffold_34000068	>jgi|Dappu1|312417|NCBI_GNO_0600216	jgi|Dappu1|234950|SNAP_00003008	>jgi|Dappu1|14543|gw1.2709.3.1	>jgi|Dappu1|8726|gw1.15.165.1
>jgi|Dappu1|105070|fgenesh1_pg.C_scaffold_34000079	>jgi|Dappu1|312424|NCBI_GNO_0600223	jgi|Dappu1|221366|estExt_fgenesh1_pg.C_40536	>jgi|Dappu1|14555|gw1.157.25.1	>jgi|Dappu1|100732|fgenesh1_pg.C_scaffold_15000297
>jgi|Dappu1|105072|fgenesh1_pg.C_scaffold_34000081	>jgi|Dappu1|235778|SNAP_00003836	jgi|Dappu1|96431|fgenesh1_pg.C_scaffold_4000547	>jgi|Dappu1|14559|gw1.143.23.1	>jgi|Dappu1|100740|fgenesh1_pg.C_scaffold_15000305
>jgi|Dappu1|105073|fgenesh1_pg.C_scaffold_34000082	>jgi|Dappu1|235779|SNAP_00003837	jgi|Dappu1|96436|fgenesh1_pg.C_scaffold_4000552	>jgi|Dappu1|14562|gw1.92.27.1	>jgi|Dappu1|242162|SNAP_00010220
>jgi|Dappu1|105077|fgenesh1_pg.C_scaffold_34000086	>jgi|Dappu1|221759|estExt_fgenesh1_pg.C_60220	jgi|Dappu1|305553|PASA_GEN_0400167	>jgi|Dappu1|14628|gw1.108.35.1	>jgi|Dappu1|242176|SNAP_00010234
>jgi|Dappu1|105078|fgenesh1_pg.C_scaffold_34000087	>jgi|Dappu1|312434|NCBI_GNO_0600233	jgi|Dappu1|234972|SNAP_00003030	>jgi|Dappu1|14718|gw1.59.74.1	>jgi|Dappu1|317497|NCBI_GNO_2100066
>jgi|Dappu1|105080|fgenesh1_pg.C_scaffold_34000089	>jgi|Dappu1|235795|SNAP_00003853	jgi|Dappu1|311779|NCBI_GNO_0400554	>jgi|Dappu1|14804|gw1.944.1.1	>jgi|Dappu1|211258|estExt_Genewise1.C_210035
>jgi|Dappu1|105081|fgenesh1_pg.C_scaffold_34000090	>jgi|Dappu1|312443|NCBI_GNO_0600242	jgi|Dappu1|96441|fgenesh1_pg.C_scaffold_4000557	>jgi|Dappu1|14857|gw1.72.138.1	>jgi|Dappu1|303402|PASA_GEN_2100009
>jgi|Dappu1|105090|fgenesh1_pg.C_scaffold_34000099	>jgi|Dappu1|235797|SNAP_00003855	jgi|Dappu1|230342|estExt_fgenesh1_kg.C_40055	>jgi|Dappu1|14901|gw1.93.24.1	>jgi|Dappu1|102354|fgenesh1_pg.C_scaffold_21000066
>jgi|Dappu1|105093|fgenesh1_pg.C_scaffold_34000102	>jgi|Dappu1|235798|SNAP_00003856	jgi|Dappu1|305555|PASA_GEN_0400169	>jgi|Dappu1|14909|gw1.87.118.1	>jgi|Dappu1|303458|PASA_GEN_2100075
>jgi|Dappu1|105094|fgenesh1_pg.C_scaffold_34000103	>jgi|Dappu1|97176|fgenesh1_pg.C_scaffold_6000243	jgi|Dappu1|311784|NCBI_GNO_0400559	>jgi|Dappu1|15205|gw1.86.81.1	>jgi|Dappu1|102384|fgenesh1_pg.C_scaffold_21000096
>jgi|Dappu1|105105|fgenesh1_pg.C_scaffold_34000114	>jgi|Dappu1|312451|NCBI_GNO_0600250	jgi|Dappu1|311789|NCBI_GNO_0400564	>jgi|Dappu1|15329|gw1.356.20.1	>jgi|Dappu1|317581|NCBI_GNO_2100150
>jgi|Dappu1|105106|fgenesh1_pg.C_scaffold_34000115	>jgi|Dappu1|235808|SNAP_00003866	jgi|Dappu1|305733|PASA_GEN_0400387	>jgi|Dappu1|15719|gw1.57.46.1	>jgi|Dappu1|303470|PASA_GEN_2100089
>jgi|Dappu1|105109|fgenesh1_pg.C_scaffold_34000118	>jgi|Dappu1|97180|fgenesh1_pg.C_scaffold_6000247	jgi|Dappu1|96467|fgenesh1_pg.C_scaffold_4000583	>jgi|Dappu1|15739|gw1.601.3.1	>jgi|Dappu1|242342|SNAP_00010400
>jgi|Dappu1|105110|fgenesh1_pg.C_scaffold_34000119	>jgi|Dappu1|97181|fgenesh1_pg.C_scaffold_6000248	jgi|Dappu1|42631|e_gw1.4.953.1	>jgi|Dappu1|15911|gw1.270.5.1	>jgi|Dappu1|317601|NCBI_GNO_2100170
>jgi|Dappu1|105119|fgenesh1_pg.C_scaffold_34000128	>jgi|Dappu1|235814|SNAP_00003872	jgi|Dappu1|311808|NCBI_GNO_0400583	>jgi|Dappu1|15938|gw1.50.33.1	>jgi|Dappu1|102446|fgenesh1_pg.C_scaffold_21000158
>jgi|Dappu1|105120|fgenesh1_pg.C_scaffold_34000129	>jgi|Dappu1|97188|fgenesh1_pg.C_scaffold_6000255	jgi|Dappu1|235009|SNAP_00003067	>jgi|Dappu1|16163|gw1.1121.4.1	>jgi|Dappu1|102466|fgenesh1_pg.C_scaffold_21000178
>jgi|Dappu1|105129|fgenesh1_pg.C_scaffold_34000138	>jgi|Dappu1|312460|NCBI_GNO_0600259	jgi|Dappu1|305563|PASA_GEN_0400179	>jgi|Dappu1|16300|gw1.230.27.1	>jgi|Dappu1|224268|estExt_fgenesh1_pg.C_210178
>jgi|Dappu1|105130|fgenesh1_pg.C_scaffold_34000139	>jgi|Dappu1|235817|SNAP_00003875	jgi|Dappu1|96503|fgenesh1_pg.C_scaffold_4000619	>jgi|Dappu1|16724|gw1.118.53.1	>jgi|Dappu1|317628|NCBI_GNO_2100197
>jgi|Dappu1|105136|fgenesh1_pg.C_scaffold_35000004	>jgi|Dappu1|97190|fgenesh1_pg.C_scaffold_6000257	jgi|Dappu1|96505|fgenesh1_pg.C_scaffold_4000621	>jgi|Dappu1|16784|gw1.64.73.1	>jgi|Dappu1|50242|e_gw1.21.316.1
>jgi|Dappu1|105139|fgenesh1_pg.C_scaffold_35000007	>jgi|Dappu1|307124|PASA_GEN_0600093	jgi|Dappu1|96940|fgenesh1_pg.C_scaffold_6000007	>jgi|Dappu1|17024|gw1.248.7.1	>jgi|Dappu1|317645|NCBI_GNO_2100214
>jgi|Dappu1|105141|fgenesh1_pg.C_scaffold_35000009	>jgi|Dappu1|312464|NCBI_GNO_0600263	jgi|Dappu1|235531|SNAP_00003589	>jgi|Dappu1|17028|gw1.248.8.1	>jgi|Dappu1|317650|NCBI_GNO_2100219
>jgi|Dappu1|105144|fgenesh1_pg.C_scaffold_35000012	>jgi|Dappu1|312465|NCBI_GNO_0600264	jgi|Dappu1|92123|fgenesh1_kg.C_scaffold_6000002	>jgi|Dappu1|17040|gw1.1856.3.1	>jgi|Dappu1|242443|SNAP_00010501
>jgi|Dappu1|105145|fgenesh1_pg.C_scaffold_35000013	>jgi|Dappu1|312466|NCBI_GNO_0600265	jgi|Dappu1|96952|fgenesh1_pg.C_scaffold_6000019	>jgi|Dappu1|17071|gw1.215.15.1	>jgi|Dappu1|317693|NCBI_GNO_2100262
>jgi|Dappu1|105150|fgenesh1_pg.C_scaffold_35000018	>jgi|Dappu1|312469|NCBI_GNO_0600268	jgi|Dappu1|312222|NCBI_GNO_0600018	>jgi|Dappu1|17080|gw1.98.51.1	>jgi|Dappu1|317695|NCBI_GNO_2100264
>jgi|Dappu1|105152|fgenesh1_pg.C_scaffold_35000020	>jgi|Dappu1|235829|SNAP_00003887	jgi|Dappu1|312223|NCBI_GNO_0600019	>jgi|Dappu1|17089|gw1.331.2.1	>jgi|Dappu1|255774|SNAP_00023832
>jgi|Dappu1|105154|fgenesh1_pg.C_scaffold_35000022	>jgi|Dappu1|312479|NCBI_GNO_0600278	jgi|Dappu1|312225|NCBI_GNO_0600021	>jgi|Dappu1|17091|gw1.331.3.1	>jgi|Dappu1|255785|SNAP_00023843
>jgi|Dappu1|105157|fgenesh1_pg.C_scaffold_35000025	>jgi|Dappu1|235832|SNAP_00003890	jgi|Dappu1|312226|NCBI_GNO_0600022	>jgi|Dappu1|17224|gw1.1674.1.1	>jgi|Dappu1|327238|NCBI_GNO_8800050
>jgi|Dappu1|105158|fgenesh1_pg.C_scaffold_35000026	>jgi|Dappu1|312480|NCBI_GNO_0600279	jgi|Dappu1|235547|SNAP_00003605	>jgi|Dappu1|17399|gw1.96.47.1	>jgi|Dappu1|255836|SNAP_00023894
>jgi|Dappu1|105159|fgenesh1_pg.C_scaffold_35000027	>jgi|Dappu1|235833|SNAP_00003891	jgi|Dappu1|235549|SNAP_00003607	>jgi|Dappu1|17433|gw1.96.50.1	>jgi|Dappu1|260713|SNAP_00028771
>jgi|Dappu1|105164|fgenesh1_pg.C_scaffold_35000032	>jgi|Dappu1|235834|SNAP_00003892	jgi|Dappu1|96961|fgenesh1_pg.C_scaffold_6000028	>jgi|Dappu1|17453|gw1.1012.3.1	>jgi|Dappu1|260714|SNAP_00028772
>jgi|Dappu1|105168|fgenesh1_pg.C_scaffold_35000036	>jgi|Dappu1|235835|SNAP_00003893	jgi|Dappu1|235552|SNAP_00003610	>jgi|Dappu1|17491|gw1.64.79.1	>jgi|Dappu1|301712|PASA_GEN_14200034
>jgi|Dappu1|105210|fgenesh1_pg.C_scaffold_35000078	>jgi|Dappu1|235836|SNAP_00003894	jgi|Dappu1|96977|fgenesh1_pg.C_scaffold_6000044	>jgi|Dappu1|17586|gw1.93.49.1	>jgi|Dappu1|330488|NCBI_GNO_14200011
>jgi|Dappu1|105211|fgenesh1_pg.C_scaffold_35000079	>jgi|Dappu1|235837|SNAP_00003895	jgi|Dappu1|96978|fgenesh1_pg.C_scaffold_6000045	>jgi|Dappu1|17599|gw1.146.29.1	>jgi|Dappu1|114946|fgenesh1_pg.C_scaffold_142000033
>jgi|Dappu1|105240|fgenesh1_pg.C_scaffold_35000108	>jgi|Dappu1|312482|NCBI_GNO_0600281	jgi|Dappu1|312252|NCBI_GNO_0600048	>jgi|Dappu1|17793|gw1.807.1.1	>jgi|Dappu1|114981|fgenesh1_pg.C_scaffold_142000068
>jgi|Dappu1|105245|fgenesh1_pg.C_scaffold_35000113	>jgi|Dappu1|235840|SNAP_00003898	jgi|Dappu1|307044|PASA_GEN_0600014	>jgi|Dappu1|17829|gw1.4639.1.1	>jgi|Dappu1|309029|PASA_GEN_0900087
>jgi|Dappu1|105251|fgenesh1_pg.C_scaffold_35000119	>jgi|Dappu1|312486|NCBI_GNO_0600285	jgi|Dappu1|235574|SNAP_00003632	>jgi|Dappu1|17959|gw1.3535.3.1	>jgi|Dappu1|98218|fgenesh1_pg.C_scaffold_9000011
>jgi|Dappu1|105252|fgenesh1_pg.C_scaffold_35000120	>jgi|Dappu1|312488|NCBI_GNO_0600287	jgi|Dappu1|235575|SNAP_00003633	>jgi|Dappu1|18003|gw1.5248.2.1	>jgi|Dappu1|308960|PASA_GEN_0900004
>jgi|Dappu1|105253|fgenesh1_pg.C_scaffold_35000121	>jgi|Dappu1|312491|NCBI_GNO_0600290	jgi|Dappu1|235601|SNAP_00003659	>jgi|Dappu1|18087|gw1.187.65.1	>jgi|Dappu1|313414|NCBI_GNO_0900037
>jgi|Dappu1|105260|fgenesh1_pg.C_scaffold_35000128	>jgi|Dappu1|312492|NCBI_GNO_0600291	jgi|Dappu1|221707|estExt_fgenesh1_pg.C_60079	>jgi|Dappu1|18102|gw1.143.39.1	>jgi|Dappu1|313432|NCBI_GNO_0900058
>jgi|Dappu1|105262|fgenesh1_pg.C_scaffold_35000130	>jgi|Dappu1|235850|SNAP_00003908	jgi|Dappu1|235608|SNAP_00003666	>jgi|Dappu1|18105|gw1.195.9.1	>jgi|Dappu1|237130|SNAP_00005188
>jgi|Dappu1|105270|fgenesh1_pg.C_scaffold_35000138	>jgi|Dappu1|235851|SNAP_00003909	jgi|Dappu1|235609|SNAP_00003667	>jgi|Dappu1|18147|gw1.1432.4.1	>jgi|Dappu1|308966|PASA_GEN_0900012
>jgi|Dappu1|105284|fgenesh1_pg.C_scaffold_35000152	>jgi|Dappu1|235852|SNAP_00003910	jgi|Dappu1|97016|fgenesh1_pg.C_scaffold_6000083	>jgi|Dappu1|18262|gw1.2285.3.1	>jgi|Dappu1|313486|NCBI_GNO_0900112
>jgi|Dappu1|105286|fgenesh1_pg.C_scaffold_35000154	>jgi|Dappu1|312495|NCBI_GNO_0600294	jgi|Dappu1|235613|SNAP_00003671	>jgi|Dappu1|18308|gw1.89.100.1	>jgi|Dappu1|222344|estExt_fgenesh1_pg.C_90135
>jgi|Dappu1|105287|fgenesh1_pg.C_scaffold_35000155	>jgi|Dappu1|235855|SNAP_00003913	jgi|Dappu1|307053|PASA_GEN_0600023	>jgi|Dappu1|18310|gw1.79.101.1	>jgi|Dappu1|98347|fgenesh1_pg.C_scaffold_9000140
>jgi|Dappu1|105288|fgenesh1_pg.C_scaffold_35000156	>jgi|Dappu1|97223|fgenesh1_pg.C_scaffold_6000290	jgi|Dappu1|235619|SNAP_00003677	>jgi|Dappu1|18312|gw1.64.89.1	>jgi|Dappu1|98365|fgenesh1_pg.C_scaffold_9000158
>jgi|Dappu1|105289|fgenesh1_pg.C_scaffold_35000157	>jgi|Dappu1|97225|fgenesh1_pg.C_scaffold_6000292	jgi|Dappu1|312284|NCBI_GNO_0600080	>jgi|Dappu1|18314|gw1.96.55.1	>jgi|Dappu1|313590|NCBI_GNO_0900216
>jgi|Dappu1|105290|fgenesh1_pg.C_scaffold_35000158	>jgi|Dappu1|312499|NCBI_GNO_0600298	jgi|Dappu1|312287|NCBI_GNO_0600083	>jgi|Dappu1|18317|gw1.86.103.1	>jgi|Dappu1|98455|fgenesh1_pg.C_scaffold_9000248
>jgi|Dappu1|105293|fgenesh1_pg.C_scaffold_35000161	>jgi|Dappu1|312500|NCBI_GNO_0600299	jgi|Dappu1|235623|SNAP_00003681	>jgi|Dappu1|18318|gw1.79.104.1	>jgi|Dappu1|237470|SNAP_00005528
>jgi|Dappu1|105294|fgenesh1_pg.C_scaffold_35000162	>jgi|Dappu1|312505|NCBI_GNO_0600304	jgi|Dappu1|235624|SNAP_00003682	>jgi|Dappu1|18333|gw1.794.5.1	>jgi|Dappu1|309118|PASA_GEN_0900189
>jgi|Dappu1|105297|fgenesh1_pg.C_scaffold_35000165	>jgi|Dappu1|235864|SNAP_00003922	jgi|Dappu1|235629|SNAP_00003687	>jgi|Dappu1|18338|gw1.79.113.1	>jgi|Dappu1|309119|PASA_GEN_0900190
>jgi|Dappu1|105299|fgenesh1_pg.C_scaffold_35000167	>jgi|Dappu1|312508|NCBI_GNO_0600307	jgi|Dappu1|312298|NCBI_GNO_0600096	>jgi|Dappu1|18346|gw1.79.116.1	>jgi|Dappu1|309028|PASA_GEN_0900086
>jgi|Dappu1|105300|fgenesh1_pg.C_scaffold_36000001	>jgi|Dappu1|235872|SNAP_00003930	jgi|Dappu1|312300|NCBI_GNO_0600098	>jgi|Dappu1|1835|gw1.81.4.1	>jgi|Dappu1|325978|NCBI_GNO_7500032
>jgi|Dappu1|105308|fgenesh1_pg.C_scaffold_36000009	>jgi|Dappu1|235874|SNAP_00003932	jgi|Dappu1|97041|fgenesh1_pg.C_scaffold_6000108	>jgi|Dappu1|18492|gw1.6017.3.1	>jgi|Dappu1|326002|NCBI_GNO_7500056
>jgi|Dappu1|105309|fgenesh1_pg.C_scaffold_36000010	>jgi|Dappu1|312515|NCBI_GNO_0600314	jgi|Dappu1|312303|NCBI_GNO_0600101	>jgi|Dappu1|18631|gw1.313.1.1	>jgi|Dappu1|110502|fgenesh1_pg.C_scaffold_75000067
>jgi|Dappu1|105310|fgenesh1_pg.C_scaffold_36000011	>jgi|Dappu1|235876|SNAP_00003934	jgi|Dappu1|97049|fgenesh1_pg.C_scaffold_6000116	>jgi|Dappu1|188047|estExt_fgenesh1_pm.C_200024	>jgi|Dappu1|308147|PASA_GEN_7500058
>jgi|Dappu1|105311|fgenesh1_pg.C_scaffold_36000012	>jgi|Dappu1|235877|SNAP_00003935	jgi|Dappu1|235651|SNAP_00003709	>jgi|Dappu1|188087|estExt_fgenesh1_pm.C_210045	>jgi|Dappu1|308113|PASA_GEN_7500021
>jgi|Dappu1|105312|fgenesh1_pg.C_scaffold_36000013	>jgi|Dappu1|235884|SNAP_00003942	jgi|Dappu1|235652|SNAP_00003710	>jgi|Dappu1|188210|estExt_fgenesh1_pm.C_250057	>jgi|Dappu1|308154|PASA_GEN_7500067
>jgi|Dappu1|105313|fgenesh1_pg.C_scaffold_36000014	>jgi|Dappu1|235885|SNAP_00003943	jgi|Dappu1|207678|estExt_Genewise1.C_60255	>jgi|Dappu1|18869|gw1.1812.1.1	>jgi|Dappu1|308122|PASA_GEN_7500030
>jgi|Dappu1|105321|fgenesh1_pg.C_scaffold_36000022	>jgi|Dappu1|235886|SNAP_00003944	jgi|Dappu1|235658|SNAP_00003716	>jgi|Dappu1|189107|estExt_fgenesh1_pm.C_860002	>jgi|Dappu1|308158|PASA_GEN_7500071
>jgi|Dappu1|105323|fgenesh1_pg.C_scaffold_36000024	>jgi|Dappu1|235887|SNAP_00003945	jgi|Dappu1|312323|NCBI_GNO_0600121	>jgi|Dappu1|18944|gw1.4287.1.1	>jgi|Dappu1|254229|SNAP_00022287
>jgi|Dappu1|105337|fgenesh1_pg.C_scaffold_36000038	>jgi|Dappu1|235888|SNAP_00003946	jgi|Dappu1|97062|fgenesh1_pg.C_scaffold_6000129	>jgi|Dappu1|18961|gw1.55.110.1	>jgi|Dappu1|225579|estExt_fgenesh1_pg.C_390002
>jgi|Dappu1|105346|fgenesh1_pg.C_scaffold_36000047	>jgi|Dappu1|97249|fgenesh1_pg.C_scaffold_6000316	jgi|Dappu1|312326|NCBI_GNO_0600124	>jgi|Dappu1|18962|gw1.3430.1.1	>jgi|Dappu1|305376|PASA_GEN_3900048
>jgi|Dappu1|105349|fgenesh1_pg.C_scaffold_36000050	>jgi|Dappu1|235890|SNAP_00003948	jgi|Dappu1|312327|NCBI_GNO_0600125	>jgi|Dappu1|18999|gw1.853.4.1	>jgi|Dappu1|321103|NCBI_GNO_3900006
>jgi|Dappu1|105352|fgenesh1_pg.C_scaffold_36000053	>jgi|Dappu1|235891|SNAP_00003949	jgi|Dappu1|235664|SNAP_00003722	>jgi|Dappu1|19047|gw1.2483.1.1	>jgi|Dappu1|225597|estExt_fgenesh1_pg.C_390035
>jgi|Dappu1|105354|fgenesh1_pg.C_scaffold_36000055	>jgi|Dappu1|235892|SNAP_00003950	jgi|Dappu1|312328|NCBI_GNO_0600126	>jgi|Dappu1|190503|estExt_Genewise1Plus.C_20144	>jgi|Dappu1|53925|e_gw1.39.176.1
>jgi|Dappu1|105365|fgenesh1_pg.C_scaffold_36000066	>jgi|Dappu1|312527|NCBI_GNO_0600326	jgi|Dappu1|312329|NCBI_GNO_0600127	>jgi|Dappu1|190557|estExt_Genewise1Plus.C_20213	>jgi|Dappu1|225607|estExt_fgenesh1_pg.C_390055
>jgi|Dappu1|105366|fgenesh1_pg.C_scaffold_36000067	>jgi|Dappu1|312528|NCBI_GNO_0600327	jgi|Dappu1|43629|e_gw1.6.303.1	>jgi|Dappu1|19099|gw1.3631.1.1	>jgi|Dappu1|247272|SNAP_00015330
>jgi|Dappu1|105367|fgenesh1_pg.C_scaffold_36000068	>jgi|Dappu1|97253|fgenesh1_pg.C_scaffold_6000320	jgi|Dappu1|307119|PASA_GEN_0600064	>jgi|Dappu1|19167|gw1.5085.4.1	>jgi|Dappu1|53936|e_gw1.39.46.1
>jgi|Dappu1|105374|fgenesh1_pg.C_scaffold_36000075	>jgi|Dappu1|97254|fgenesh1_pg.C_scaffold_6000321	jgi|Dappu1|235672|SNAP_00003730	>jgi|Dappu1|191742|estExt_Genewise1Plus.C_40424	>jgi|Dappu1|321206|NCBI_GNO_3900110
>jgi|Dappu1|105376|fgenesh1_pg.C_scaffold_36000077	>jgi|Dappu1|235901|SNAP_00003959	jgi|Dappu1|235673|SNAP_00003731	>jgi|Dappu1|192539|estExt_Genewise1Plus.C_60245	>jgi|Dappu1|321230|NCBI_GNO_3900134
>jgi|Dappu1|105377|fgenesh1_pg.C_scaffold_36000078	>jgi|Dappu1|235902|SNAP_00003960	jgi|Dappu1|235674|SNAP_00003732	>jgi|Dappu1|192601|estExt_Genewise1Plus.C_60384	>jgi|Dappu1|305368|PASA_GEN_3900037
>jgi|Dappu1|105382|fgenesh1_pg.C_scaffold_36000083	>jgi|Dappu1|307131|PASA_GEN_0600102	jgi|Dappu1|235675|SNAP_00003733	>jgi|Dappu1|192973|estExt_Genewise1Plus.C_70364	>jgi|Dappu1|105965|fgenesh1_pg.C_scaffold_39000146
>jgi|Dappu1|105383|fgenesh1_pg.C_scaffold_36000084	>jgi|Dappu1|235905|SNAP_00003963	jgi|Dappu1|312340|NCBI_GNO_0600138	>jgi|Dappu1|193467|estExt_Genewise1Plus.C_90080	>jgi|Dappu1|321778|NCBI_GNO_4300005
>jgi|Dappu1|105400|fgenesh1_pg.C_scaffold_36000101	>jgi|Dappu1|235907|SNAP_00003965	jgi|Dappu1|97076|fgenesh1_pg.C_scaffold_6000143	>jgi|Dappu1|19349|gw1.2125.2.1	>jgi|Dappu1|321779|NCBI_GNO_4300006
>jgi|Dappu1|105415|fgenesh1_pg.C_scaffold_36000116	>jgi|Dappu1|235908|SNAP_00003966	jgi|Dappu1|312342|NCBI_GNO_0600140	>jgi|Dappu1|193583|estExt_Genewise1Plus.C_90310	>jgi|Dappu1|321781|NCBI_GNO_4300008
>jgi|Dappu1|105418|fgenesh1_pg.C_scaffold_36000119	>jgi|Dappu1|235909|SNAP_00003967	jgi|Dappu1|97078|fgenesh1_pg.C_scaffold_6000145	>jgi|Dappu1|194191|estExt_Genewise1Plus.C_110317	>jgi|Dappu1|305948|PASA_GEN_4300009
>jgi|Dappu1|105419|fgenesh1_pg.C_scaffold_36000120	>jgi|Dappu1|235910|SNAP_00003968	jgi|Dappu1|97084|fgenesh1_pg.C_scaffold_6000151	>jgi|Dappu1|194294|estExt_Genewise1Plus.C_110459	>jgi|Dappu1|188519|estExt_fgenesh1_pm.C_430021
>jgi|Dappu1|105420|fgenesh1_pg.C_scaffold_36000121	>jgi|Dappu1|235915|SNAP_00003973	jgi|Dappu1|235695|SNAP_00003753	>jgi|Dappu1|19438|gw1.10031.2.1	>jgi|Dappu1|321847|NCBI_GNO_4300074
>jgi|Dappu1|105421|fgenesh1_pg.C_scaffold_36000122	>jgi|Dappu1|307134|PASA_GEN_0600107	jgi|Dappu1|235696|SNAP_00003754	>jgi|Dappu1|194472|estExt_Genewise1Plus.C_120316	>jgi|Dappu1|321851|NCBI_GNO_4300078
>jgi|Dappu1|105426|fgenesh1_pg.C_scaffold_36000127	>jgi|Dappu1|221787|estExt_fgenesh1_pg.C_60329	jgi|Dappu1|235697|SNAP_00003755	>jgi|Dappu1|19452|gw1.7015.1.1	>jgi|Dappu1|305975|PASA_GEN_4300040
>jgi|Dappu1|105439|fgenesh1_pg.C_scaffold_36000140	>jgi|Dappu1|312542|NCBI_GNO_0600341	jgi|Dappu1|235698|SNAP_00003756	>jgi|Dappu1|194525|estExt_Genewise1Plus.C_130008	>jgi|Dappu1|306025|PASA_GEN_4300105
>jgi|Dappu1|105446|fgenesh1_pg.C_scaffold_36000147	>jgi|Dappu1|235918|SNAP_00003976	jgi|Dappu1|97096|fgenesh1_pg.C_scaffold_6000163	>jgi|Dappu1|194538|estExt_Genewise1Plus.C_130031	>jgi|Dappu1|305976|PASA_GEN_4300041
>jgi|Dappu1|105452|fgenesh1_pg.C_scaffold_36000153	>jgi|Dappu1|235919|SNAP_00003977	jgi|Dappu1|235707|SNAP_00003765	>jgi|Dappu1|194557|estExt_Genewise1Plus.C_130056	>jgi|Dappu1|306028|PASA_GEN_4300109
>jgi|Dappu1|105454|fgenesh1_pg.C_scaffold_36000155	>jgi|Dappu1|312544|NCBI_GNO_0600343	jgi|Dappu1|312367|NCBI_GNO_0600166	>jgi|Dappu1|194570|estExt_Genewise1Plus.C_130083	>jgi|Dappu1|225907|estExt_fgenesh1_pg.C_430119
>jgi|Dappu1|105462|fgenesh1_pg.C_scaffold_36000163	>jgi|Dappu1|235922|SNAP_00003980	jgi|Dappu1|97099|fgenesh1_pg.C_scaffold_6000166	>jgi|Dappu1|194683|estExt_Genewise1Plus.C_130264	>jgi|Dappu1|306032|PASA_GEN_4300113
>jgi|Dappu1|105465|fgenesh1_pg.C_scaffold_36000166	>jgi|Dappu1|235923|SNAP_00003981	jgi|Dappu1|235713|SNAP_00003771	>jgi|Dappu1|19488|gw1.6439.1.1	>jgi|Dappu1|321888|NCBI_GNO_4300115
>jgi|Dappu1|105470|fgenesh1_pg.C_scaffold_36000171	>jgi|Dappu1|97268|fgenesh1_pg.C_scaffold_6000335	jgi|Dappu1|312371|NCBI_GNO_0600170	>jgi|Dappu1|195011|estExt_Genewise1Plus.C_150058	>jgi|Dappu1|305989|PASA_GEN_4300055
>jgi|Dappu1|105471|fgenesh1_pg.C_scaffold_36000172	>jgi|Dappu1|312548|NCBI_GNO_0600347	jgi|Dappu1|312373|NCBI_GNO_0600172	>jgi|Dappu1|19545|gw1.6588.4.1	>jgi|Dappu1|229490|estExt_fgenesh1_pg.C_1910011
>jgi|Dappu1|105472|fgenesh1_pg.C_scaffold_36000173	>jgi|Dappu1|235928|SNAP_00003986	jgi|Dappu1|235717|SNAP_00003775	>jgi|Dappu1|195543|estExt_Genewise1Plus.C_170452	>jgi|Dappu1|302915|PASA_GEN_19100018
>jgi|Dappu1|105475|fgenesh1_pg.C_scaffold_36000176	>jgi|Dappu1|235929|SNAP_00003987	jgi|Dappu1|312376|NCBI_GNO_0600175	>jgi|Dappu1|195585|estExt_Genewise1Plus.C_180082	>jgi|Dappu1|332430|NCBI_GNO_19100018
>jgi|Dappu1|105487|fgenesh1_pg.C_scaffold_36000188	>jgi|Dappu1|307137|PASA_GEN_0600111	jgi|Dappu1|235718|SNAP_00003776	>jgi|Dappu1|195644|estExt_Genewise1Plus.C_180180	>jgi|Dappu1|302097|PASA_GEN_1600058
>jgi|Dappu1|105491|fgenesh1_pg.C_scaffold_36000192	>jgi|Dappu1|97277|fgenesh1_pg.C_scaffold_6000344	jgi|Dappu1|235719|SNAP_00003777	>jgi|Dappu1|195649|estExt_Genewise1Plus.C_180185	>jgi|Dappu1|302099|PASA_GEN_1600060
>jgi|Dappu1|105494|fgenesh1_pg.C_scaffold_36000195	>jgi|Dappu1|97280|fgenesh1_pg.C_scaffold_6000347	jgi|Dappu1|97108|fgenesh1_pg.C_scaffold_6000175	>jgi|Dappu1|196057|estExt_Genewise1Plus.C_200152	>jgi|Dappu1|315940|NCBI_GNO_1600014
>jgi|Dappu1|105495|fgenesh1_pg.C_scaffold_36000196	>jgi|Dappu1|235944|SNAP_00004002	jgi|Dappu1|97109|fgenesh1_pg.C_scaffold_6000176	>jgi|Dappu1|196131|estExt_Genewise1Plus.C_200273	>jgi|Dappu1|315961|NCBI_GNO_1600035
>jgi|Dappu1|105498|fgenesh1_pg.C_scaffold_36000199	>jgi|Dappu1|235945|SNAP_00004003	jgi|Dappu1|312379|NCBI_GNO_0600178	>jgi|Dappu1|196694|estExt_Genewise1Plus.C_240219	>jgi|Dappu1|315974|NCBI_GNO_1600048
>jgi|Dappu1|105503|fgenesh1_pg.C_scaffold_36000204	>jgi|Dappu1|235947|SNAP_00004005	jgi|Dappu1|235727|SNAP_00003785	>jgi|Dappu1|196706|estExt_Genewise1Plus.C_240237	>jgi|Dappu1|302112|PASA_GEN_1600074
>jgi|Dappu1|105505|fgenesh1_pg.C_scaffold_36000206	>jgi|Dappu1|312571|NCBI_GNO_0600370	jgi|Dappu1|97119|fgenesh1_pg.C_scaffold_6000186	>jgi|Dappu1|196945|estExt_Genewise1Plus.C_250265	>jgi|Dappu1|100837|fgenesh1_pg.C_scaffold_16000082
>jgi|Dappu1|105507|fgenesh1_pg.C_scaffold_36000208	>jgi|Dappu1|235953|SNAP_00004011	jgi|Dappu1|235732|SNAP_00003790	>jgi|Dappu1|198023|estExt_Genewise1Plus.C_360005	>jgi|Dappu1|240386|SNAP_00008444
>jgi|Dappu1|105508|fgenesh1_pg.C_scaffold_36000209	>jgi|Dappu1|97301|fgenesh1_pg.C_scaffold_6000368	jgi|Dappu1|235733|SNAP_00003791	>jgi|Dappu1|198029|estExt_Genewise1Plus.C_360014	>jgi|Dappu1|240424|SNAP_00008482
>jgi|Dappu1|105512|fgenesh1_pg.C_scaffold_36000213	>jgi|Dappu1|312588|NCBI_GNO_0600387	jgi|Dappu1|235738|SNAP_00003796	>jgi|Dappu1|198357|estExt_Genewise1Plus.C_400126	>jgi|Dappu1|302158|PASA_GEN_1600136
>jgi|Dappu1|105521|fgenesh1_pg.C_scaffold_36000222	>jgi|Dappu1|312589|NCBI_GNO_0600388	jgi|Dappu1|235739|SNAP_00003797	>jgi|Dappu1|198385|estExt_Genewise1Plus.C_400180	>jgi|Dappu1|302141|PASA_GEN_1600113
>jgi|Dappu1|105524|fgenesh1_pg.C_scaffold_36000225	>jgi|Dappu1|312590|NCBI_GNO_0600389	jgi|Dappu1|235740|SNAP_00003798	>jgi|Dappu1|198492|estExt_Genewise1Plus.C_420048	>jgi|Dappu1|316149|NCBI_GNO_1600224
>jgi|Dappu1|105525|fgenesh1_pg.C_scaffold_36000226	>jgi|Dappu1|312591|NCBI_GNO_0600390	jgi|Dappu1|312402|NCBI_GNO_0600201	>jgi|Dappu1|198799|estExt_Genewise1Plus.C_440074	>jgi|Dappu1|100997|fgenesh1_pg.C_scaffold_16000242
>jgi|Dappu1|105530|fgenesh1_pg.C_scaffold_36000231	>jgi|Dappu1|235973|SNAP_00004031	jgi|Dappu1|235751|SNAP_00003809	>jgi|Dappu1|198878|estExt_Genewise1Plus.C_460050	>jgi|Dappu1|101019|fgenesh1_pg.C_scaffold_16000264
>jgi|Dappu1|105531|fgenesh1_pg.C_scaffold_36000232	>jgi|Dappu1|312596|NCBI_GNO_0600395	jgi|Dappu1|235752|SNAP_00003810	>jgi|Dappu1|198899|estExt_Genewise1Plus.C_460104	>jgi|Dappu1|127998|fgenesh1_pm.C_scaffold_16000030
>jgi|Dappu1|105533|fgenesh1_pg.C_scaffold_37000001	>jgi|Dappu1|235975|SNAP_00004033	jgi|Dappu1|97135|fgenesh1_pg.C_scaffold_6000202	>jgi|Dappu1|19901|gw1.10204.1.1	>jgi|Dappu1|101046|fgenesh1_pg.C_scaffold_16000291
>jgi|Dappu1|105537|fgenesh1_pg.C_scaffold_37000005	>jgi|Dappu1|312600|NCBI_GNO_0600399	jgi|Dappu1|312415|NCBI_GNO_0600214	>jgi|Dappu1|199215|estExt_Genewise1Plus.C_510144	>jgi|Dappu1|327781|NCBI_GNO_9500017
>jgi|Dappu1|105539|fgenesh1_pg.C_scaffold_37000007	>jgi|Dappu1|235979|SNAP_00004037	jgi|Dappu1|235764|SNAP_00003822	>jgi|Dappu1|199280|estExt_Genewise1Plus.C_520070	>jgi|Dappu1|309288|PASA_GEN_9500011
>jgi|Dappu1|105541|fgenesh1_pg.C_scaffold_37000009	>jgi|Dappu1|97324|fgenesh1_pg.C_scaffold_6000391	jgi|Dappu1|235765|SNAP_00003823	>jgi|Dappu1|199303|estExt_Genewise1Plus.C_520108	>jgi|Dappu1|256634|SNAP_00024692
>jgi|Dappu1|105542|fgenesh1_pg.C_scaffold_37000010	>jgi|Dappu1|235980|SNAP_00004038	jgi|Dappu1|235766|SNAP_00003824	>jgi|Dappu1|199694|estExt_Genewise1Plus.C_580061	>jgi|Dappu1|327797|NCBI_GNO_9500033
>jgi|Dappu1|105546|fgenesh1_pg.C_scaffold_37000014	>jgi|Dappu1|235981|SNAP_00004039	jgi|Dappu1|235767|SNAP_00003825	>jgi|Dappu1|199988|estExt_Genewise1Plus.C_610131	>jgi|Dappu1|327799|NCBI_GNO_9500035
>jgi|Dappu1|105551|fgenesh1_pg.C_scaffold_37000019	>jgi|Dappu1|97325|fgenesh1_pg.C_scaffold_6000392	jgi|Dappu1|235768|SNAP_00003826	>jgi|Dappu1|200087|estExt_Genewise1Plus.C_620061	>jgi|Dappu1|309283|PASA_GEN_9500005
>jgi|Dappu1|105555|fgenesh1_pg.C_scaffold_37000023	>jgi|Dappu1|312602|NCBI_GNO_0600401	jgi|Dappu1|312417|NCBI_GNO_0600216	>jgi|Dappu1|200149|estExt_Genewise1Plus.C_620143	>jgi|Dappu1|229408|estExt_fgenesh1_pg.C_1820021
>jgi|Dappu1|105556|fgenesh1_pg.C_scaffold_37000024	>jgi|Dappu1|235985|SNAP_00004043	jgi|Dappu1|312424|NCBI_GNO_0600223	>jgi|Dappu1|200582|estExt_Genewise1Plus.C_700080	>jgi|Dappu1|245554|SNAP_00013612
>jgi|Dappu1|105562|fgenesh1_pg.C_scaffold_37000030	>jgi|Dappu1|235986|SNAP_00004044	jgi|Dappu1|235776|SNAP_00003834	>jgi|Dappu1|200654|estExt_Genewise1Plus.C_720089	>jgi|Dappu1|245602|SNAP_00013660
>jgi|Dappu1|105568|fgenesh1_pg.C_scaffold_37000036	>jgi|Dappu1|307146|PASA_GEN_0600120	jgi|Dappu1|235778|SNAP_00003836	>jgi|Dappu1|200882|estExt_Genewise1Plus.C_750105	>jgi|Dappu1|320065|NCBI_GNO_3300081
>jgi|Dappu1|105570|fgenesh1_pg.C_scaffold_37000038	>jgi|Dappu1|312606|NCBI_GNO_0600405	jgi|Dappu1|235779|SNAP_00003837	>jgi|Dappu1|201098|estExt_Genewise1Plus.C_780002	>jgi|Dappu1|245666|SNAP_00013724
>jgi|Dappu1|105582|fgenesh1_pg.C_scaffold_37000050	>jgi|Dappu1|97333|fgenesh1_pg.C_scaffold_6000400	jgi|Dappu1|221759|estExt_fgenesh1_pg.C_60220	>jgi|Dappu1|201180|estExt_Genewise1Plus.C_790069	>jgi|Dappu1|305101|PASA_GEN_3300043
>jgi|Dappu1|105584|fgenesh1_pg.C_scaffold_37000052	>jgi|Dappu1|312608|NCBI_GNO_0600407	jgi|Dappu1|192619|estExt_Genewise1Plus.C_60457	>jgi|Dappu1|201267|estExt_Genewise1Plus.C_800074	>jgi|Dappu1|320093|NCBI_GNO_3300109
>jgi|Dappu1|105593|fgenesh1_pg.C_scaffold_37000061	>jgi|Dappu1|312609|NCBI_GNO_0600408	jgi|Dappu1|312432|NCBI_GNO_0600231	>jgi|Dappu1|202129|estExt_Genewise1Plus.C_960062	>jgi|Dappu1|53091|e_gw1.33.40.1
>jgi|Dappu1|105595|fgenesh1_pg.C_scaffold_37000063	>jgi|Dappu1|43755|e_gw1.6.698.1	jgi|Dappu1|221764|estExt_fgenesh1_pg.C_60226	>jgi|Dappu1|203293|estExt_Genewise1Plus.C_1350012	>jgi|Dappu1|320100|NCBI_GNO_3300116
>jgi|Dappu1|105596|fgenesh1_pg.C_scaffold_37000064	>jgi|Dappu1|97337|fgenesh1_pg.C_scaffold_6000404	jgi|Dappu1|312434|NCBI_GNO_0600233	>jgi|Dappu1|203681|estExt_Genewise1Plus.C_1550036	>jgi|Dappu1|104948|fgenesh1_pg.C_scaffold_33000117
>jgi|Dappu1|105600|fgenesh1_pg.C_scaffold_37000068	>jgi|Dappu1|236002|SNAP_00004060	jgi|Dappu1|97163|fgenesh1_pg.C_scaffold_6000230	>jgi|Dappu1|203687|estExt_Genewise1Plus.C_1570017	>jgi|Dappu1|320126|NCBI_GNO_3300142
>jgi|Dappu1|105601|fgenesh1_pg.C_scaffold_37000069	>jgi|Dappu1|236003|SNAP_00004061	jgi|Dappu1|235795|SNAP_00003853	>jgi|Dappu1|203760|estExt_Genewise1Plus.C_1620009	>jgi|Dappu1|305085|PASA_GEN_3300020
>jgi|Dappu1|105611|fgenesh1_pg.C_scaffold_37000079	>jgi|Dappu1|312611|NCBI_GNO_0600410	jgi|Dappu1|312443|NCBI_GNO_0600242	>jgi|Dappu1|203789|estExt_Genewise1Plus.C_1630026	>jgi|Dappu1|305112|PASA_GEN_3300058
>jgi|Dappu1|105613|fgenesh1_pg.C_scaffold_37000081	>jgi|Dappu1|312612|NCBI_GNO_0600411	jgi|Dappu1|235797|SNAP_00003855	>jgi|Dappu1|203795|estExt_Genewise1Plus.C_1630032	>jgi|Dappu1|325919|NCBI_GNO_7400025
>jgi|Dappu1|105615|fgenesh1_pg.C_scaffold_37000083	>jgi|Dappu1|97342|fgenesh1_pg.C_scaffold_6000409	jgi|Dappu1|235798|SNAP_00003856	>jgi|Dappu1|203797|estExt_Genewise1Plus.C_1630034	>jgi|Dappu1|325921|NCBI_GNO_7400027
>jgi|Dappu1|105619|fgenesh1_pg.C_scaffold_37000087	>jgi|Dappu1|236012|SNAP_00004070	jgi|Dappu1|97176|fgenesh1_pg.C_scaffold_6000243	>jgi|Dappu1|204033|estExt_Genewise1Plus.C_1820043	>jgi|Dappu1|227314|estExt_fgenesh1_pg.C_740045
>jgi|Dappu1|105621|fgenesh1_pg.C_scaffold_37000089	>jgi|Dappu1|236013|SNAP_00004071	jgi|Dappu1|312451|NCBI_GNO_0600250	>jgi|Dappu1|204061|estExt_Genewise1Plus.C_1830065	>jgi|Dappu1|309328|PASA_GEN_9700010
>jgi|Dappu1|105629|fgenesh1_pg.C_scaffold_37000097	>jgi|Dappu1|236014|SNAP_00004072	jgi|Dappu1|235808|SNAP_00003866	>jgi|Dappu1|204173|estExt_Genewise1Plus.C_1920001	>jgi|Dappu1|309335|PASA_GEN_9700024
>jgi|Dappu1|105630|fgenesh1_pg.C_scaffold_37000098	>jgi|Dappu1|307148|PASA_GEN_0600122	jgi|Dappu1|97180|fgenesh1_pg.C_scaffold_6000247	>jgi|Dappu1|206765|estExt_Genewise1.C_40233	>jgi|Dappu1|309343|PASA_GEN_9700032
>jgi|Dappu1|105632|fgenesh1_pg.C_scaffold_37000100	>jgi|Dappu1|236017|SNAP_00004075	jgi|Dappu1|97181|fgenesh1_pg.C_scaffold_6000248	>jgi|Dappu1|207678|estExt_Genewise1.C_60255	>jgi|Dappu1|256895|SNAP_00024953
>jgi|Dappu1|105633|fgenesh1_pg.C_scaffold_37000101	>jgi|Dappu1|236018|SNAP_00004076	jgi|Dappu1|235814|SNAP_00003872	>jgi|Dappu1|207683|estExt_Genewise1.C_60261	>jgi|Dappu1|231603|estExt_fgenesh1_kg.C_970020
>jgi|Dappu1|105638|fgenesh1_pg.C_scaffold_37000106	>jgi|Dappu1|236019|SNAP_00004077	jgi|Dappu1|97188|fgenesh1_pg.C_scaffold_6000255	>jgi|Dappu1|208740|estExt_Genewise1.C_90378	>jgi|Dappu1|328008|NCBI_GNO_9700088
>jgi|Dappu1|105644|fgenesh1_pg.C_scaffold_37000112	>jgi|Dappu1|236020|SNAP_00004078	jgi|Dappu1|312460|NCBI_GNO_0600259	>jgi|Dappu1|208749|estExt_Genewise1.C_90399	>jgi|Dappu1|313764|NCBI_GNO_1000002
>jgi|Dappu1|105645|fgenesh1_pg.C_scaffold_37000113	>jgi|Dappu1|312622|NCBI_GNO_0600421	jgi|Dappu1|235817|SNAP_00003875	>jgi|Dappu1|208848|estExt_Genewise1.C_100110	>jgi|Dappu1|237569|SNAP_00005627
>jgi|Dappu1|105648|fgenesh1_pg.C_scaffold_37000116	>jgi|Dappu1|312623|NCBI_GNO_0600422	jgi|Dappu1|97190|fgenesh1_pg.C_scaffold_6000257	>jgi|Dappu1|208965|estExt_Genewise1.C_100320	>jgi|Dappu1|46236|e_gw1.10.452.1
>jgi|Dappu1|105649|fgenesh1_pg.C_scaffold_37000117	>jgi|Dappu1|236022|SNAP_00004080	jgi|Dappu1|307124|PASA_GEN_0600093	>jgi|Dappu1|209101|estExt_Genewise1.C_100539	>jgi|Dappu1|300339|PASA_GEN_1000178
>jgi|Dappu1|105672|fgenesh1_pg.C_scaffold_37000140	>jgi|Dappu1|236023|SNAP_00004081	jgi|Dappu1|312464|NCBI_GNO_0600263	>jgi|Dappu1|209553|estExt_Genewise1.C_120273	>jgi|Dappu1|98611|fgenesh1_pg.C_scaffold_10000034
>jgi|Dappu1|105677|fgenesh1_pg.C_scaffold_38000003	>jgi|Dappu1|312624|NCBI_GNO_0600423	jgi|Dappu1|312465|NCBI_GNO_0600264	>jgi|Dappu1|209641|estExt_Genewise1.C_130035	>jgi|Dappu1|313800|NCBI_GNO_1000038
>jgi|Dappu1|105678|fgenesh1_pg.C_scaffold_38000004	>jgi|Dappu1|236026|SNAP_00004084	jgi|Dappu1|312466|NCBI_GNO_0600265	>jgi|Dappu1|210344|estExt_Genewise1.C_160126	>jgi|Dappu1|313831|NCBI_GNO_1000069
>jgi|Dappu1|105679|fgenesh1_pg.C_scaffold_38000005	>jgi|Dappu1|312635|NCBI_GNO_0600440	jgi|Dappu1|312469|NCBI_GNO_0600268	>jgi|Dappu1|210571|estExt_Genewise1.C_170351	>jgi|Dappu1|313839|NCBI_GNO_1000077
>jgi|Dappu1|105681|fgenesh1_pg.C_scaffold_38000007	>jgi|Dappu1|312639|NCBI_GNO_0600444	jgi|Dappu1|312471|NCBI_GNO_0600270	>jgi|Dappu1|210586|estExt_Genewise1.C_170366	>jgi|Dappu1|313869|NCBI_GNO_1000107
>jgi|Dappu1|105682|fgenesh1_pg.C_scaffold_38000008	>jgi|Dappu1|97368|fgenesh1_pg.C_scaffold_6000435	jgi|Dappu1|235829|SNAP_00003887	>jgi|Dappu1|211493|estExt_Genewise1.C_230098	>jgi|Dappu1|300366|PASA_GEN_1000209
>jgi|Dappu1|105685|fgenesh1_pg.C_scaffold_38000011	>jgi|Dappu1|97369|fgenesh1_pg.C_scaffold_6000436	jgi|Dappu1|312479|NCBI_GNO_0600278	>jgi|Dappu1|211780|estExt_Genewise1.C_240228	>jgi|Dappu1|98713|fgenesh1_pg.C_scaffold_10000136
>jgi|Dappu1|105686|fgenesh1_pg.C_scaffold_38000012	>jgi|Dappu1|97370|fgenesh1_pg.C_scaffold_6000437	jgi|Dappu1|235832|SNAP_00003890	>jgi|Dappu1|212681|estExt_Genewise1.C_310083	>jgi|Dappu1|237695|SNAP_00005753
>jgi|Dappu1|105691|fgenesh1_pg.C_scaffold_38000017	>jgi|Dappu1|97371|fgenesh1_pg.C_scaffold_6000438	jgi|Dappu1|312480|NCBI_GNO_0600279	>jgi|Dappu1|213162|estExt_Genewise1.C_360210	>jgi|Dappu1|300260|PASA_GEN_1000077
>jgi|Dappu1|105698|fgenesh1_pg.C_scaffold_38000024	>jgi|Dappu1|97372|fgenesh1_pg.C_scaffold_6000439	jgi|Dappu1|235833|SNAP_00003891	>jgi|Dappu1|213335|estExt_Genewise1.C_390163	>jgi|Dappu1|237781|SNAP_00005839
>jgi|Dappu1|105702|fgenesh1_pg.C_scaffold_38000028	>jgi|Dappu1|236043|SNAP_00004101	jgi|Dappu1|235834|SNAP_00003892	>jgi|Dappu1|213412|estExt_Genewise1.C_400149	>jgi|Dappu1|237782|SNAP_00005840
>jgi|Dappu1|105703|fgenesh1_pg.C_scaffold_38000029	>jgi|Dappu1|221835|estExt_fgenesh1_pg.C_60437	jgi|Dappu1|235835|SNAP_00003893	>jgi|Dappu1|213444|estExt_Genewise1.C_400216	>jgi|Dappu1|313982|NCBI_GNO_1000220
>jgi|Dappu1|105704|fgenesh1_pg.C_scaffold_38000030	>jgi|Dappu1|221836|estExt_fgenesh1_pg.C_60438	jgi|Dappu1|235836|SNAP_00003894	>jgi|Dappu1|213553|estExt_Genewise1.C_420085	>jgi|Dappu1|300393|PASA_GEN_1000239
>jgi|Dappu1|105705|fgenesh1_pg.C_scaffold_38000031	>jgi|Dappu1|236047|SNAP_00004105	jgi|Dappu1|235837|SNAP_00003895	>jgi|Dappu1|215008|estExt_Genewise1.C_610135	>jgi|Dappu1|237809|SNAP_00005867
>jgi|Dappu1|105706|fgenesh1_pg.C_scaffold_38000032	>jgi|Dappu1|236048|SNAP_00004106	jgi|Dappu1|312482|NCBI_GNO_0600281	>jgi|Dappu1|215674|estExt_Genewise1.C_720113	>jgi|Dappu1|300286|PASA_GEN_1000107
>jgi|Dappu1|105707|fgenesh1_pg.C_scaffold_38000033	>jgi|Dappu1|236049|SNAP_00004107	jgi|Dappu1|235840|SNAP_00003898	>jgi|Dappu1|215844|estExt_Genewise1.C_750030	>jgi|Dappu1|314099|NCBI_GNO_1000337
>jgi|Dappu1|105708|fgenesh1_pg.C_scaffold_38000034	>jgi|Dappu1|312649|NCBI_GNO_0600454	jgi|Dappu1|312486|NCBI_GNO_0600285	>jgi|Dappu1|216106|estExt_Genewise1.C_780007	>jgi|Dappu1|300422|PASA_GEN_1000273
>jgi|Dappu1|105717|fgenesh1_pg.C_scaffold_38000043	>jgi|Dappu1|236050|SNAP_00004108	jgi|Dappu1|312488|NCBI_GNO_0600287	>jgi|Dappu1|216184|estExt_Genewise1.C_790068	>jgi|Dappu1|300429|PASA_GEN_1000281
>jgi|Dappu1|105723|fgenesh1_pg.C_scaffold_38000049	>jgi|Dappu1|236051|SNAP_00004109	jgi|Dappu1|312491|NCBI_GNO_0600290	>jgi|Dappu1|217123|estExt_Genewise1.C_960045	>jgi|Dappu1|300433|PASA_GEN_1000286
>jgi|Dappu1|105724|fgenesh1_pg.C_scaffold_38000050	>jgi|Dappu1|236052|SNAP_00004110	jgi|Dappu1|312492|NCBI_GNO_0600291	>jgi|Dappu1|218141|estExt_Genewise1.C_1250002	>jgi|Dappu1|300436|PASA_GEN_1000289
>jgi|Dappu1|105725|fgenesh1_pg.C_scaffold_38000051	>jgi|Dappu1|236053|SNAP_00004111	jgi|Dappu1|235850|SNAP_00003908	>jgi|Dappu1|218190|estExt_Genewise1.C_1290056	>jgi|Dappu1|314211|NCBI_GNO_1000450
>jgi|Dappu1|105730|fgenesh1_pg.C_scaffold_38000056	>jgi|Dappu1|312654|NCBI_GNO_0600459	jgi|Dappu1|235851|SNAP_00003909	>jgi|Dappu1|218200|estExt_Genewise1.C_1300026	>jgi|Dappu1|314212|NCBI_GNO_1000451
>jgi|Dappu1|105734|fgenesh1_pg.C_scaffold_38000060	>jgi|Dappu1|312655|NCBI_GNO_0600460	jgi|Dappu1|235852|SNAP_00003910	>jgi|Dappu1|218787|estExt_Genewise1.C_1630041	>jgi|Dappu1|193952|estExt_Genewise1Plus.C_100472
>jgi|Dappu1|105735|fgenesh1_pg.C_scaffold_38000061	>jgi|Dappu1|312660|NCBI_GNO_0600465	jgi|Dappu1|312495|NCBI_GNO_0600294	>jgi|Dappu1|219079|estExt_Genewise1.C_1870040	>jgi|Dappu1|98992|fgenesh1_pg.C_scaffold_10000415
>jgi|Dappu1|105736|fgenesh1_pg.C_scaffold_38000062	>jgi|Dappu1|312661|NCBI_GNO_0600466	jgi|Dappu1|235855|SNAP_00003913	>jgi|Dappu1|219145|estExt_Genewise1.C_1920004	>jgi|Dappu1|99002|fgenesh1_pg.C_scaffold_10000425
>jgi|Dappu1|105747|fgenesh1_pg.C_scaffold_38000073	>jgi|Dappu1|312664|NCBI_GNO_0600469	jgi|Dappu1|97223|fgenesh1_pg.C_scaffold_6000290	>jgi|Dappu1|219658|estExt_Genewise1.C_4710009	>jgi|Dappu1|238085|SNAP_00006143
>jgi|Dappu1|105750|fgenesh1_pg.C_scaffold_38000076	>jgi|Dappu1|236065|SNAP_00004123	jgi|Dappu1|97225|fgenesh1_pg.C_scaffold_6000292	>jgi|Dappu1|219820|estExt_Genewise1.C_13960003	>jgi|Dappu1|99056|fgenesh1_pg.C_scaffold_10000479
>jgi|Dappu1|105759|fgenesh1_pg.C_scaffold_38000085	>jgi|Dappu1|236069|SNAP_00004127	jgi|Dappu1|312499|NCBI_GNO_0600298	>jgi|Dappu1|219830|estExt_Genewise1.C_15140001	>jgi|Dappu1|314290|NCBI_GNO_1000529
>jgi|Dappu1|105768|fgenesh1_pg.C_scaffold_38000094	>jgi|Dappu1|97395|fgenesh1_pg.C_scaffold_6000462	jgi|Dappu1|312500|NCBI_GNO_0600299	>jgi|Dappu1|220403|estExt_fgenesh1_pg.C_20190	>jgi|Dappu1|326714|NCBI_GNO_8300006
>jgi|Dappu1|105772|fgenesh1_pg.C_scaffold_38000098	>jgi|Dappu1|236072|SNAP_00004130	jgi|Dappu1|43811|e_gw1.6.761.1	>jgi|Dappu1|220405|estExt_fgenesh1_pg.C_20192	>jgi|Dappu1|308635|PASA_GEN_8300002
>jgi|Dappu1|105780|fgenesh1_pg.C_scaffold_38000106	>jgi|Dappu1|312673|NCBI_GNO_0600478	jgi|Dappu1|312502|NCBI_GNO_0600301	>jgi|Dappu1|220501|estExt_fgenesh1_pg.C_20363	>jgi|Dappu1|326724|NCBI_GNO_8300016
>jgi|Dappu1|105792|fgenesh1_pg.C_scaffold_38000118	>jgi|Dappu1|236074|SNAP_00004132	jgi|Dappu1|312505|NCBI_GNO_0600304	>jgi|Dappu1|220523|estExt_fgenesh1_pg.C_20412	>jgi|Dappu1|326734|NCBI_GNO_8300026
>jgi|Dappu1|105798|fgenesh1_pg.C_scaffold_38000124	>jgi|Dappu1|312676|NCBI_GNO_0600481	jgi|Dappu1|235864|SNAP_00003922	>jgi|Dappu1|220681|estExt_fgenesh1_pg.C_30001	>jgi|Dappu1|326741|NCBI_GNO_8300033
>jgi|Dappu1|105803|fgenesh1_pg.C_scaffold_38000129	>jgi|Dappu1|312677|NCBI_GNO_0600482	jgi|Dappu1|312508|NCBI_GNO_0600307	>jgi|Dappu1|220682|estExt_fgenesh1_pg.C_30002	>jgi|Dappu1|326748|NCBI_GNO_8300040
>jgi|Dappu1|105811|fgenesh1_pg.C_scaffold_38000137	>jgi|Dappu1|236077|SNAP_00004135	jgi|Dappu1|235872|SNAP_00003930	>jgi|Dappu1|220700|estExt_fgenesh1_pg.C_30039	>jgi|Dappu1|216409|estExt_Genewise1.C_830088
>jgi|Dappu1|105813|fgenesh1_pg.C_scaffold_38000139	>jgi|Dappu1|236078|SNAP_00004136	jgi|Dappu1|235874|SNAP_00003932	>jgi|Dappu1|220978|estExt_fgenesh1_pg.C_30498	>jgi|Dappu1|201415|estExt_Genewise1Plus.C_830099
>jgi|Dappu1|105814|fgenesh1_pg.C_scaffold_38000140	>jgi|Dappu1|236079|SNAP_00004137	jgi|Dappu1|312515|NCBI_GNO_0600314	>jgi|Dappu1|220992|estExt_fgenesh1_pg.C_30523	>jgi|Dappu1|326752|NCBI_GNO_8300044
>jgi|Dappu1|105818|fgenesh1_pg.C_scaffold_38000144	>jgi|Dappu1|236080|SNAP_00004138	jgi|Dappu1|235876|SNAP_00003934	>jgi|Dappu1|221219|estExt_fgenesh1_pg.C_40268	>jgi|Dappu1|326757|NCBI_GNO_8300049
>jgi|Dappu1|105819|fgenesh1_pg.C_scaffold_38000145	>jgi|Dappu1|236081|SNAP_00004139	jgi|Dappu1|235877|SNAP_00003935	>jgi|Dappu1|221284|estExt_fgenesh1_pg.C_40371	>jgi|Dappu1|308656|PASA_GEN_8300026
>jgi|Dappu1|105826|fgenesh1_pg.C_scaffold_39000007	>jgi|Dappu1|236082|SNAP_00004140	jgi|Dappu1|235884|SNAP_00003942	>jgi|Dappu1|221291|estExt_fgenesh1_pg.C_40379	>jgi|Dappu1|308692|PASA_GEN_8300067
>jgi|Dappu1|105831|fgenesh1_pg.C_scaffold_39000012	>jgi|Dappu1|312681|NCBI_GNO_0600486	jgi|Dappu1|235885|SNAP_00003943	>jgi|Dappu1|221393|estExt_fgenesh1_pg.C_40590	>jgi|Dappu1|59752|e_gw1.83.163.1
>jgi|Dappu1|105833|fgenesh1_pg.C_scaffold_39000014	>jgi|Dappu1|97404|fgenesh1_pg.C_scaffold_6000471	jgi|Dappu1|235886|SNAP_00003944	>jgi|Dappu1|221514|estExt_fgenesh1_pg.C_50170	>jgi|Dappu1|308664|PASA_GEN_8300034
>jgi|Dappu1|105843|fgenesh1_pg.C_scaffold_39000024	>jgi|Dappu1|221844|estExt_fgenesh1_pg.C_60467	jgi|Dappu1|235887|SNAP_00003945	>jgi|Dappu1|221724|estExt_fgenesh1_pg.C_60119	>jgi|Dappu1|111327|fgenesh1_pg.C_scaffold_83000099
>jgi|Dappu1|105846|fgenesh1_pg.C_scaffold_39000027	>jgi|Dappu1|236090|SNAP_00004148	jgi|Dappu1|235888|SNAP_00003946	>jgi|Dappu1|221817|estExt_fgenesh1_pg.C_60407	>jgi|Dappu1|58975|e_gw1.77.12.1
>jgi|Dappu1|105851|fgenesh1_pg.C_scaffold_39000032	>jgi|Dappu1|236091|SNAP_00004149	jgi|Dappu1|97249|fgenesh1_pg.C_scaffold_6000316	>jgi|Dappu1|222053|estExt_fgenesh1_pg.C_80004	>jgi|Dappu1|308236|PASA_GEN_7700007
>jgi|Dappu1|105853|fgenesh1_pg.C_scaffold_39000034	>jgi|Dappu1|236092|SNAP_00004150	jgi|Dappu1|235890|SNAP_00003948	>jgi|Dappu1|222106|estExt_fgenesh1_pg.C_80076	>jgi|Dappu1|254419|SNAP_00022477
>jgi|Dappu1|105855|fgenesh1_pg.C_scaffold_39000036	>jgi|Dappu1|236095|SNAP_00004153	jgi|Dappu1|235891|SNAP_00003949	>jgi|Dappu1|222309|estExt_fgenesh1_pg.C_90058	>jgi|Dappu1|308276|PASA_GEN_7700058
>jgi|Dappu1|105863|fgenesh1_pg.C_scaffold_39000044	>jgi|Dappu1|236096|SNAP_00004154	jgi|Dappu1|235892|SNAP_00003950	>jgi|Dappu1|222316|estExt_fgenesh1_pg.C_90087	>jgi|Dappu1|308284|PASA_GEN_7700069
>jgi|Dappu1|105864|fgenesh1_pg.C_scaffold_39000045	>jgi|Dappu1|236098|SNAP_00004156	jgi|Dappu1|312527|NCBI_GNO_0600326	>jgi|Dappu1|222358|estExt_fgenesh1_pg.C_90170	>jgi|Dappu1|308285|PASA_GEN_7700070
>jgi|Dappu1|105865|fgenesh1_pg.C_scaffold_39000046	>jgi|Dappu1|312692|NCBI_GNO_0600497	jgi|Dappu1|312528|NCBI_GNO_0600327	>jgi|Dappu1|222398|estExt_fgenesh1_pg.C_90268	>jgi|Dappu1|7096|gw1.50.11.1
>jgi|Dappu1|105881|fgenesh1_pg.C_scaffold_39000062	>jgi|Dappu1|236100|SNAP_00004158	jgi|Dappu1|97253|fgenesh1_pg.C_scaffold_6000320	>jgi|Dappu1|222588|estExt_fgenesh1_pg.C_100311	>jgi|Dappu1|226169|estExt_fgenesh1_pg.C_490003
>jgi|Dappu1|105891|fgenesh1_pg.C_scaffold_39000072	>jgi|Dappu1|221846|estExt_fgenesh1_pg.C_60473	jgi|Dappu1|97254|fgenesh1_pg.C_scaffold_6000321	>jgi|Dappu1|222627|estExt_fgenesh1_pg.C_100380	>jgi|Dappu1|107322|fgenesh1_pg.C_scaffold_49000004
>jgi|Dappu1|105893|fgenesh1_pg.C_scaffold_39000074	>jgi|Dappu1|236102|SNAP_00004160	jgi|Dappu1|235901|SNAP_00003959	>jgi|Dappu1|222659|estExt_fgenesh1_pg.C_100434	>jgi|Dappu1|249496|SNAP_00017554
>jgi|Dappu1|105900|fgenesh1_pg.C_scaffold_39000081	>jgi|Dappu1|236106|SNAP_00004164	jgi|Dappu1|235902|SNAP_00003960	>jgi|Dappu1|222817|estExt_fgenesh1_pg.C_110240	>jgi|Dappu1|107360|fgenesh1_pg.C_scaffold_49000042
>jgi|Dappu1|105909|fgenesh1_pg.C_scaffold_39000090	>jgi|Dappu1|236110|SNAP_00004168	jgi|Dappu1|307131|PASA_GEN_0600102	>jgi|Dappu1|222950|estExt_fgenesh1_pg.C_120159	>jgi|Dappu1|322765|NCBI_GNO_4900079
>jgi|Dappu1|105911|fgenesh1_pg.C_scaffold_39000092	>jgi|Dappu1|236114|SNAP_00004172	jgi|Dappu1|235905|SNAP_00003963	>jgi|Dappu1|223022|estExt_fgenesh1_pg.C_130014	>jgi|Dappu1|306337|PASA_GEN_4900031
>jgi|Dappu1|105916|fgenesh1_pg.C_scaffold_39000097	>jgi|Dappu1|97425|fgenesh1_pg.C_scaffold_6000492	jgi|Dappu1|235907|SNAP_00003965	>jgi|Dappu1|223101|estExt_fgenesh1_pg.C_130171	>jgi|Dappu1|322804|NCBI_GNO_4900118
>jgi|Dappu1|105919|fgenesh1_pg.C_scaffold_39000100	>jgi|Dappu1|312704|NCBI_GNO_0600509	jgi|Dappu1|235908|SNAP_00003966	>jgi|Dappu1|223140|estExt_fgenesh1_pg.C_130242	>jgi|Dappu1|322805|NCBI_GNO_4900119
>jgi|Dappu1|105940|fgenesh1_pg.C_scaffold_39000121	>jgi|Dappu1|236120|SNAP_00004178	jgi|Dappu1|235909|SNAP_00003967	>jgi|Dappu1|223182|estExt_fgenesh1_pg.C_130335	>jgi|Dappu1|306342|PASA_GEN_4900038
>jgi|Dappu1|105941|fgenesh1_pg.C_scaffold_39000122	>jgi|Dappu1|192749|estExt_Genewise1Plus.C_60824	jgi|Dappu1|235910|SNAP_00003968	>jgi|Dappu1|223192|estExt_fgenesh1_pg.C_140029	>jgi|Dappu1|108802|fgenesh1_pg.C_scaffold_61000013
>jgi|Dappu1|105942|fgenesh1_pg.C_scaffold_39000123	>jgi|Dappu1|221856|estExt_fgenesh1_pg.C_60502	jgi|Dappu1|235915|SNAP_00003973	>jgi|Dappu1|223236|estExt_fgenesh1_pg.C_140179	>jgi|Dappu1|251840|SNAP_00019898
>jgi|Dappu1|105963|fgenesh1_pg.C_scaffold_39000144	>jgi|Dappu1|97441|fgenesh1_pg.C_scaffold_6000508	jgi|Dappu1|97261|fgenesh1_pg.C_scaffold_6000328	>jgi|Dappu1|223256|estExt_fgenesh1_pg.C_140217	>jgi|Dappu1|324323|NCBI_GNO_6100050
>jgi|Dappu1|105964|fgenesh1_pg.C_scaffold_39000145	>jgi|Dappu1|307163|PASA_GEN_0600145	jgi|Dappu1|307134|PASA_GEN_0600107	>jgi|Dappu1|223258|estExt_fgenesh1_pg.C_140226	>jgi|Dappu1|324329|NCBI_GNO_6100056
>jgi|Dappu1|105986|fgenesh1_pg.C_scaffold_40000021	>jgi|Dappu1|221858|estExt_fgenesh1_pg.C_60505	jgi|Dappu1|221787|estExt_fgenesh1_pg.C_60329	>jgi|Dappu1|223263|estExt_fgenesh1_pg.C_140240	>jgi|Dappu1|307288|PASA_GEN_6100057
>jgi|Dappu1|105995|fgenesh1_pg.C_scaffold_40000030	>jgi|Dappu1|221859|estExt_fgenesh1_pg.C_60506	jgi|Dappu1|312542|NCBI_GNO_0600341	>jgi|Dappu1|223347|estExt_fgenesh1_pg.C_150054	>jgi|Dappu1|251906|SNAP_00019964
>jgi|Dappu1|106003|fgenesh1_pg.C_scaffold_40000038	>jgi|Dappu1|307164|PASA_GEN_0600146	jgi|Dappu1|235918|SNAP_00003976	>jgi|Dappu1|223388|estExt_fgenesh1_pg.C_150137	>jgi|Dappu1|324348|NCBI_GNO_6100075
>jgi|Dappu1|106007|fgenesh1_pg.C_scaffold_40000042	>jgi|Dappu1|97446|fgenesh1_pg.C_scaffold_6000513	jgi|Dappu1|235919|SNAP_00003977	>jgi|Dappu1|223518|estExt_fgenesh1_pg.C_160086	>jgi|Dappu1|307294|PASA_GEN_6100066
>jgi|Dappu1|106012|fgenesh1_pg.C_scaffold_40000047	>jgi|Dappu1|312721|NCBI_GNO_0600527	jgi|Dappu1|312544|NCBI_GNO_0600343	>jgi|Dappu1|223533|estExt_fgenesh1_pg.C_160129	>jgi|Dappu1|226732|estExt_fgenesh1_pg.C_610115
>jgi|Dappu1|106018|fgenesh1_pg.C_scaffold_40000053	>jgi|Dappu1|97448|fgenesh1_pg.C_scaffold_6000515	jgi|Dappu1|307135|PASA_GEN_0600109	>jgi|Dappu1|223576|estExt_fgenesh1_pg.C_160252	>jgi|Dappu1|324394|NCBI_GNO_6100121
>jgi|Dappu1|106027|fgenesh1_pg.C_scaffold_40000062	>jgi|Dappu1|307167|PASA_GEN_0600149	jgi|Dappu1|235922|SNAP_00003980	>jgi|Dappu1|223594|estExt_fgenesh1_pg.C_170014	>jgi|Dappu1|231309|estExt_fgenesh1_kg.C_610038
>jgi|Dappu1|106044|fgenesh1_pg.C_scaffold_40000079	>jgi|Dappu1|307168|PASA_GEN_0600150	jgi|Dappu1|235923|SNAP_00003981	>jgi|Dappu1|223730|estExt_fgenesh1_pg.C_170305	>jgi|Dappu1|231691|estExt_fgenesh1_kg.C_1150001
>jgi|Dappu1|106058|fgenesh1_pg.C_scaffold_40000093	>jgi|Dappu1|236137|SNAP_00004195	jgi|Dappu1|97268|fgenesh1_pg.C_scaffold_6000335	>jgi|Dappu1|223736|estExt_fgenesh1_pg.C_170325	>jgi|Dappu1|258637|SNAP_00026695
>jgi|Dappu1|106059|fgenesh1_pg.C_scaffold_40000094	>jgi|Dappu1|97453|fgenesh1_pg.C_scaffold_6000520	jgi|Dappu1|312548|NCBI_GNO_0600347	>jgi|Dappu1|223803|estExt_fgenesh1_pg.C_180086	>jgi|Dappu1|231695|estExt_fgenesh1_kg.C_1150006
>jgi|Dappu1|106066|fgenesh1_pg.C_scaffold_40000101	>jgi|Dappu1|312727|NCBI_GNO_0600533	jgi|Dappu1|235927|SNAP_00003985	>jgi|Dappu1|223831|estExt_fgenesh1_pg.C_180152	>jgi|Dappu1|300948|PASA_GEN_11500019
>jgi|Dappu1|106070|fgenesh1_pg.C_scaffold_40000105	>jgi|Dappu1|304923|PASA_GEN_3100026	jgi|Dappu1|235928|SNAP_00003986	>jgi|Dappu1|223834|estExt_fgenesh1_pg.C_180158	>jgi|Dappu1|300972|PASA_GEN_11500053
>jgi|Dappu1|106095|fgenesh1_pg.C_scaffold_40000130	>jgi|Dappu1|319706|NCBI_GNO_3100003	jgi|Dappu1|235929|SNAP_00003987	>jgi|Dappu1|223849|estExt_fgenesh1_pg.C_180206	>jgi|Dappu1|329143|NCBI_GNO_11500035
>jgi|Dappu1|106106|fgenesh1_pg.C_scaffold_40000141	>jgi|Dappu1|319707|NCBI_GNO_3100004	jgi|Dappu1|307137|PASA_GEN_0600111	>jgi|Dappu1|223896|estExt_fgenesh1_pg.C_180318	>jgi|Dappu1|228693|estExt_fgenesh1_pg.C_1150062
>jgi|Dappu1|106113|fgenesh1_pg.C_scaffold_40000148	>jgi|Dappu1|245103|SNAP_00013161	jgi|Dappu1|97277|fgenesh1_pg.C_scaffold_6000344	>jgi|Dappu1|224133|estExt_fgenesh1_pg.C_200138	>jgi|Dappu1|258701|SNAP_00026759
>jgi|Dappu1|106114|fgenesh1_pg.C_scaffold_40000149	>jgi|Dappu1|319711|NCBI_GNO_3100008	jgi|Dappu1|97280|fgenesh1_pg.C_scaffold_6000347	>jgi|Dappu1|224273|estExt_fgenesh1_pg.C_210183	>jgi|Dappu1|301477|PASA_GEN_13500009
>jgi|Dappu1|106116|fgenesh1_pg.C_scaffold_40000151	>jgi|Dappu1|319715|NCBI_GNO_3100012	jgi|Dappu1|235944|SNAP_00004002	>jgi|Dappu1|224278|estExt_fgenesh1_pg.C_210189	>jgi|Dappu1|9123|gw1.135.24.1
>jgi|Dappu1|106124|fgenesh1_pg.C_scaffold_40000159	>jgi|Dappu1|319717|NCBI_GNO_3100014	jgi|Dappu1|235945|SNAP_00004003	>jgi|Dappu1|224362|estExt_fgenesh1_pg.C_230042	>jgi|Dappu1|306690|PASA_GEN_5200003
>jgi|Dappu1|106125|fgenesh1_pg.C_scaffold_40000160	>jgi|Dappu1|304926|PASA_GEN_3100029	jgi|Dappu1|235947|SNAP_00004005	>jgi|Dappu1|224365|estExt_fgenesh1_pg.C_230058	>jgi|Dappu1|323122|NCBI_GNO_5200013
>jgi|Dappu1|106129|fgenesh1_pg.C_scaffold_40000164	>jgi|Dappu1|304900|PASA_GEN_3100001	jgi|Dappu1|312570|NCBI_GNO_0600369	>jgi|Dappu1|224373|estExt_fgenesh1_pg.C_230069	>jgi|Dappu1|199244|estExt_Genewise1Plus.C_520024
>jgi|Dappu1|106130|fgenesh1_pg.C_scaffold_40000165	>jgi|Dappu1|104560|fgenesh1_pg.C_scaffold_31000023	jgi|Dappu1|312571|NCBI_GNO_0600370	>jgi|Dappu1|224437|estExt_fgenesh1_pg.C_230164	>jgi|Dappu1|323148|NCBI_GNO_5200039
>jgi|Dappu1|106131|fgenesh1_pg.C_scaffold_40000166	>jgi|Dappu1|104561|fgenesh1_pg.C_scaffold_31000024	jgi|Dappu1|235953|SNAP_00004011	>jgi|Dappu1|224483|estExt_fgenesh1_pg.C_240051	>jgi|Dappu1|250256|SNAP_00018314
>jgi|Dappu1|106132|fgenesh1_pg.C_scaffold_40000167	>jgi|Dappu1|304902|PASA_GEN_3100003	jgi|Dappu1|97301|fgenesh1_pg.C_scaffold_6000368	>jgi|Dappu1|224487|estExt_fgenesh1_pg.C_240059	>jgi|Dappu1|323209|NCBI_GNO_5200100
>jgi|Dappu1|106141|fgenesh1_pg.C_scaffold_40000176	>jgi|Dappu1|319735|NCBI_GNO_3100032	jgi|Dappu1|4146|gw1.6.61.1	>jgi|Dappu1|224768|estExt_fgenesh1_pg.C_250271	>jgi|Dappu1|107776|fgenesh1_pg.C_scaffold_52000087
>jgi|Dappu1|106149|fgenesh1_pg.C_scaffold_40000184	>jgi|Dappu1|104583|fgenesh1_pg.C_scaffold_31000046	jgi|Dappu1|312588|NCBI_GNO_0600387	>jgi|Dappu1|224791|estExt_fgenesh1_pg.C_250302	>jgi|Dappu1|323216|NCBI_GNO_5200107
>jgi|Dappu1|106150|fgenesh1_pg.C_scaffold_40000185	>jgi|Dappu1|104587|fgenesh1_pg.C_scaffold_31000050	jgi|Dappu1|312589|NCBI_GNO_0600388	>jgi|Dappu1|225026|estExt_fgenesh1_pg.C_290099	>jgi|Dappu1|93031|fgenesh1_kg.C_scaffold_52000008
>jgi|Dappu1|106152|fgenesh1_pg.C_scaffold_40000187	>jgi|Dappu1|104588|fgenesh1_pg.C_scaffold_31000051	jgi|Dappu1|312590|NCBI_GNO_0600389	>jgi|Dappu1|225028|estExt_fgenesh1_pg.C_290110	>jgi|Dappu1|250332|SNAP_00018390
>jgi|Dappu1|106153|fgenesh1_pg.C_scaffold_40000188	>jgi|Dappu1|245164|SNAP_00013222	jgi|Dappu1|312591|NCBI_GNO_0600390	>jgi|Dappu1|225030|estExt_fgenesh1_pg.C_290117	>jgi|Dappu1|323272|NCBI_GNO_5200163
>jgi|Dappu1|106154|fgenesh1_pg.C_scaffold_40000189	>jgi|Dappu1|319754|NCBI_GNO_3100051	jgi|Dappu1|235973|SNAP_00004031	>jgi|Dappu1|225189|estExt_fgenesh1_pg.C_310038	>jgi|Dappu1|100110|fgenesh1_pg.C_scaffold_14000007
>jgi|Dappu1|106161|fgenesh1_pg.C_scaffold_41000006	>jgi|Dappu1|104595|fgenesh1_pg.C_scaffold_31000058	jgi|Dappu1|312596|NCBI_GNO_0600395	>jgi|Dappu1|225204|estExt_fgenesh1_pg.C_310061	>jgi|Dappu1|239479|SNAP_00007537
>jgi|Dappu1|106162|fgenesh1_pg.C_scaffold_41000007	>jgi|Dappu1|245169|SNAP_00013227	jgi|Dappu1|235975|SNAP_00004033	>jgi|Dappu1|225207|estExt_fgenesh1_pg.C_310065	>jgi|Dappu1|239483|SNAP_00007541
>jgi|Dappu1|106165|fgenesh1_pg.C_scaffold_41000010	>jgi|Dappu1|104597|fgenesh1_pg.C_scaffold_31000060	jgi|Dappu1|307145|PASA_GEN_0600119	>jgi|Dappu1|225352|estExt_fgenesh1_pg.C_330130	>jgi|Dappu1|301615|PASA_GEN_1400078
>jgi|Dappu1|106167|fgenesh1_pg.C_scaffold_41000012	>jgi|Dappu1|304944|PASA_GEN_3100052	jgi|Dappu1|312600|NCBI_GNO_0600399	>jgi|Dappu1|225443|estExt_fgenesh1_pg.C_360002	>jgi|Dappu1|315380|NCBI_GNO_1400086
>jgi|Dappu1|106171|fgenesh1_pg.C_scaffold_41000016	>jgi|Dappu1|104605|fgenesh1_pg.C_scaffold_31000068	jgi|Dappu1|235979|SNAP_00004037	>jgi|Dappu1|225444|estExt_fgenesh1_pg.C_360003	>jgi|Dappu1|100164|fgenesh1_pg.C_scaffold_14000061
>jgi|Dappu1|106172|fgenesh1_pg.C_scaffold_41000017	>jgi|Dappu1|104611|fgenesh1_pg.C_scaffold_31000074	jgi|Dappu1|97324|fgenesh1_pg.C_scaffold_6000391	>jgi|Dappu1|225455|estExt_fgenesh1_pg.C_360041	>jgi|Dappu1|239551|SNAP_00007609
>jgi|Dappu1|106174|fgenesh1_pg.C_scaffold_41000019	>jgi|Dappu1|319765|NCBI_GNO_3100062	jgi|Dappu1|235980|SNAP_00004038	>jgi|Dappu1|225476|estExt_fgenesh1_pg.C_360123	>jgi|Dappu1|301554|PASA_GEN_1400009
>jgi|Dappu1|106175|fgenesh1_pg.C_scaffold_41000020	>jgi|Dappu1|104614|fgenesh1_pg.C_scaffold_31000077	jgi|Dappu1|235981|SNAP_00004039	>jgi|Dappu1|225480|estExt_fgenesh1_pg.C_360132	>jgi|Dappu1|239633|SNAP_00007691
>jgi|Dappu1|106183|fgenesh1_pg.C_scaffold_41000028	>jgi|Dappu1|104615|fgenesh1_pg.C_scaffold_31000078	jgi|Dappu1|97325|fgenesh1_pg.C_scaffold_6000392	>jgi|Dappu1|225495|estExt_fgenesh1_pg.C_360175	>jgi|Dappu1|100213|fgenesh1_pg.C_scaffold_14000110
>jgi|Dappu1|106191|fgenesh1_pg.C_scaffold_41000036	>jgi|Dappu1|104617|fgenesh1_pg.C_scaffold_31000080	jgi|Dappu1|312602|NCBI_GNO_0600401	>jgi|Dappu1|225511|estExt_fgenesh1_pg.C_360203	>jgi|Dappu1|301562|PASA_GEN_1400017
>jgi|Dappu1|106195|fgenesh1_pg.C_scaffold_41000040	>jgi|Dappu1|245200|SNAP_00013258	jgi|Dappu1|235985|SNAP_00004043	>jgi|Dappu1|225529|estExt_fgenesh1_pg.C_370118	>jgi|Dappu1|239688|SNAP_00007746
>jgi|Dappu1|106201|fgenesh1_pg.C_scaffold_41000046	>jgi|Dappu1|304910|PASA_GEN_3100013	jgi|Dappu1|235986|SNAP_00004044	>jgi|Dappu1|225672|estExt_fgenesh1_pg.C_400066	>jgi|Dappu1|239719|SNAP_00007777
>jgi|Dappu1|106202|fgenesh1_pg.C_scaffold_41000047	>jgi|Dappu1|245211|SNAP_00013269	jgi|Dappu1|307146|PASA_GEN_0600120	>jgi|Dappu1|225684|estExt_fgenesh1_pg.C_400096	>jgi|Dappu1|239751|SNAP_00007809
>jgi|Dappu1|106203|fgenesh1_pg.C_scaffold_41000048	>jgi|Dappu1|304955|PASA_GEN_3100063	jgi|Dappu1|312606|NCBI_GNO_0600405	>jgi|Dappu1|225749|estExt_fgenesh1_pg.C_420035	>jgi|Dappu1|100286|fgenesh1_pg.C_scaffold_14000183
>jgi|Dappu1|106209|fgenesh1_pg.C_scaffold_41000054	>jgi|Dappu1|245225|SNAP_00013283	jgi|Dappu1|97333|fgenesh1_pg.C_scaffold_6000400	>jgi|Dappu1|225993|estExt_fgenesh1_pg.C_450098	>jgi|Dappu1|301590|PASA_GEN_1400048
>jgi|Dappu1|106217|fgenesh1_pg.C_scaffold_41000062	>jgi|Dappu1|104629|fgenesh1_pg.C_scaffold_31000092	jgi|Dappu1|312608|NCBI_GNO_0600407	>jgi|Dappu1|225995|estExt_fgenesh1_pg.C_450133	>jgi|Dappu1|328621|NCBI_GNO_10600001
>jgi|Dappu1|106218|fgenesh1_pg.C_scaffold_41000063	>jgi|Dappu1|245229|SNAP_00013287	jgi|Dappu1|312609|NCBI_GNO_0600408	>jgi|Dappu1|226032|estExt_fgenesh1_pg.C_460089	>jgi|Dappu1|328622|NCBI_GNO_10600002
>jgi|Dappu1|106222|fgenesh1_pg.C_scaffold_41000067	>jgi|Dappu1|319784|NCBI_GNO_3100081	jgi|Dappu1|43755|e_gw1.6.698.1	>jgi|Dappu1|226045|estExt_fgenesh1_pg.C_460125	>jgi|Dappu1|257832|SNAP_00025890
>jgi|Dappu1|106229|fgenesh1_pg.C_scaffold_41000074	>jgi|Dappu1|245231|SNAP_00013289	jgi|Dappu1|97337|fgenesh1_pg.C_scaffold_6000404	>jgi|Dappu1|226067|estExt_fgenesh1_pg.C_470019	>jgi|Dappu1|300631|PASA_GEN_10600006
>jgi|Dappu1|106230|fgenesh1_pg.C_scaffold_41000075	>jgi|Dappu1|104631|fgenesh1_pg.C_scaffold_31000094	jgi|Dappu1|236002|SNAP_00004060	>jgi|Dappu1|226262|estExt_fgenesh1_pg.C_510118	>jgi|Dappu1|113206|fgenesh1_pg.C_scaffold_106000052
>jgi|Dappu1|106232|fgenesh1_pg.C_scaffold_41000077	>jgi|Dappu1|104632|fgenesh1_pg.C_scaffold_31000095	jgi|Dappu1|236003|SNAP_00004061	>jgi|Dappu1|226635|estExt_fgenesh1_pg.C_600077	>jgi|Dappu1|228523|estExt_fgenesh1_pg.C_1060064
>jgi|Dappu1|106233|fgenesh1_pg.C_scaffold_41000078	>jgi|Dappu1|245234|SNAP_00013292	jgi|Dappu1|312611|NCBI_GNO_0600410	>jgi|Dappu1|226735|estExt_fgenesh1_pg.C_610122	>jgi|Dappu1|247963|SNAP_00016021
>jgi|Dappu1|106236|fgenesh1_pg.C_scaffold_41000081	>jgi|Dappu1|319787|NCBI_GNO_3100084	jgi|Dappu1|312612|NCBI_GNO_0600411	>jgi|Dappu1|226743|estExt_fgenesh1_pg.C_610131	>jgi|Dappu1|106294|fgenesh1_pg.C_scaffold_42000007
>jgi|Dappu1|106242|fgenesh1_pg.C_scaffold_41000087	>jgi|Dappu1|245236|SNAP_00013294	jgi|Dappu1|97342|fgenesh1_pg.C_scaffold_6000409	>jgi|Dappu1|226776|estExt_fgenesh1_pg.C_620004	>jgi|Dappu1|247975|SNAP_00016033
>jgi|Dappu1|106245|fgenesh1_pg.C_scaffold_41000090	>jgi|Dappu1|104634|fgenesh1_pg.C_scaffold_31000097	jgi|Dappu1|236012|SNAP_00004070	>jgi|Dappu1|226800|estExt_fgenesh1_pg.C_620044	>jgi|Dappu1|321660|NCBI_GNO_4200038
>jgi|Dappu1|106251|fgenesh1_pg.C_scaffold_41000096	>jgi|Dappu1|104636|fgenesh1_pg.C_scaffold_31000099	jgi|Dappu1|236013|SNAP_00004071	>jgi|Dappu1|226949|estExt_fgenesh1_pg.C_640066	>jgi|Dappu1|321680|NCBI_GNO_4200058
>jgi|Dappu1|106264|fgenesh1_pg.C_scaffold_41000109	>jgi|Dappu1|104637|fgenesh1_pg.C_scaffold_31000100	jgi|Dappu1|236014|SNAP_00004072	>jgi|Dappu1|227055|estExt_fgenesh1_pg.C_670009	>jgi|Dappu1|248090|SNAP_00016148
>jgi|Dappu1|106265|fgenesh1_pg.C_scaffold_41000110	>jgi|Dappu1|104638|fgenesh1_pg.C_scaffold_31000101	jgi|Dappu1|307148|PASA_GEN_0600122	>jgi|Dappu1|227096|estExt_fgenesh1_pg.C_670116	>jgi|Dappu1|198542|estExt_Genewise1Plus.C_420135
>jgi|Dappu1|106268|fgenesh1_pg.C_scaffold_41000113	>jgi|Dappu1|319797|NCBI_GNO_3100094	jgi|Dappu1|236017|SNAP_00004075	>jgi|Dappu1|227101|estExt_fgenesh1_pg.C_670135	>jgi|Dappu1|305875|PASA_GEN_4200020
>jgi|Dappu1|106272|fgenesh1_pg.C_scaffold_41000117	>jgi|Dappu1|104643|fgenesh1_pg.C_scaffold_31000106	jgi|Dappu1|236018|SNAP_00004076	>jgi|Dappu1|227138|estExt_fgenesh1_pg.C_700004	>jgi|Dappu1|305879|PASA_GEN_4200025
>jgi|Dappu1|106280|fgenesh1_pg.C_scaffold_41000125	>jgi|Dappu1|104646|fgenesh1_pg.C_scaffold_31000109	jgi|Dappu1|236019|SNAP_00004077	>jgi|Dappu1|227172|estExt_fgenesh1_pg.C_700123	>jgi|Dappu1|305927|PASA_GEN_4200084
>jgi|Dappu1|106287|fgenesh1_pg.C_scaffold_41000132	>jgi|Dappu1|319806|NCBI_GNO_3100103	jgi|Dappu1|97348|fgenesh1_pg.C_scaffold_6000415	>jgi|Dappu1|227224|estExt_fgenesh1_pg.C_720088	>jgi|Dappu1|322082|NCBI_GNO_4500002
>jgi|Dappu1|106329|fgenesh1_pg.C_scaffold_42000042	>jgi|Dappu1|104649|fgenesh1_pg.C_scaffold_31000112	jgi|Dappu1|236020|SNAP_00004078	>jgi|Dappu1|227615|estExt_fgenesh1_pg.C_790097	>jgi|Dappu1|306089|PASA_GEN_4500020
>jgi|Dappu1|106343|fgenesh1_pg.C_scaffold_42000056	>jgi|Dappu1|319813|NCBI_GNO_3100110	jgi|Dappu1|97349|fgenesh1_pg.C_scaffold_6000416	>jgi|Dappu1|227773|estExt_fgenesh1_pg.C_830096	>jgi|Dappu1|106786|fgenesh1_pg.C_scaffold_45000022
>jgi|Dappu1|106345|fgenesh1_pg.C_scaffold_42000058	>jgi|Dappu1|104650|fgenesh1_pg.C_scaffold_31000113	jgi|Dappu1|312622|NCBI_GNO_0600421	>jgi|Dappu1|227830|estExt_fgenesh1_pg.C_860051	>jgi|Dappu1|322102|NCBI_GNO_4500022
>jgi|Dappu1|106354|fgenesh1_pg.C_scaffold_42000067	>jgi|Dappu1|319815|NCBI_GNO_3100112	jgi|Dappu1|312623|NCBI_GNO_0600422	>jgi|Dappu1|227874|estExt_fgenesh1_pg.C_870026	>jgi|Dappu1|322164|NCBI_GNO_4500084
>jgi|Dappu1|106397|fgenesh1_pg.C_scaffold_42000110	>jgi|Dappu1|104652|fgenesh1_pg.C_scaffold_31000115	jgi|Dappu1|236022|SNAP_00004080	>jgi|Dappu1|227990|estExt_fgenesh1_pg.C_890018	>jgi|Dappu1|248782|SNAP_00016840
>jgi|Dappu1|106401|fgenesh1_pg.C_scaffold_42000114	>jgi|Dappu1|304912|PASA_GEN_3100015	jgi|Dappu1|236023|SNAP_00004081	>jgi|Dappu1|228435|estExt_fgenesh1_pg.C_1020002	>jgi|Dappu1|306110|PASA_GEN_4500052
>jgi|Dappu1|106433|fgenesh1_pg.C_scaffold_42000146	>jgi|Dappu1|304958|PASA_GEN_3100066	jgi|Dappu1|312624|NCBI_GNO_0600423	>jgi|Dappu1|228756|estExt_fgenesh1_pg.C_1190027	>jgi|Dappu1|106883|fgenesh1_pg.C_scaffold_45000119
>jgi|Dappu1|106449|fgenesh1_pg.C_scaffold_42000162	>jgi|Dappu1|319819|NCBI_GNO_3100116	jgi|Dappu1|97351|fgenesh1_pg.C_scaffold_6000418	>jgi|Dappu1|228865|estExt_fgenesh1_pg.C_1270036	>jgi|Dappu1|256312|SNAP_00024370
>jgi|Dappu1|106477|fgenesh1_pg.C_scaffold_43000013	>jgi|Dappu1|104670|fgenesh1_pg.C_scaffold_31000133	jgi|Dappu1|236026|SNAP_00004084	>jgi|Dappu1|228902|estExt_fgenesh1_pg.C_1290063	>jgi|Dappu1|300496|PASA_GEN_10000023
>jgi|Dappu1|106480|fgenesh1_pg.C_scaffold_43000016	>jgi|Dappu1|304919|PASA_GEN_3100022	jgi|Dappu1|312635|NCBI_GNO_0600440	>jgi|Dappu1|228924|estExt_fgenesh1_pg.C_1310030	>jgi|Dappu1|257184|SNAP_00025242
>jgi|Dappu1|106592|fgenesh1_pg.C_scaffold_43000128	>jgi|Dappu1|319843|NCBI_GNO_3100140	jgi|Dappu1|312636|NCBI_GNO_0600441	>jgi|Dappu1|229351|estExt_fgenesh1_pg.C_1740003	>jgi|Dappu1|300486|PASA_GEN_10000012
>jgi|Dappu1|106601|fgenesh1_pg.C_scaffold_43000137	>jgi|Dappu1|245286|SNAP_00013344	jgi|Dappu1|312639|NCBI_GNO_0600444	>jgi|Dappu1|229381|estExt_fgenesh1_pg.C_1770020	>jgi|Dappu1|112805|fgenesh1_pg.C_scaffold_100000049
>jgi|Dappu1|106606|fgenesh1_pg.C_scaffold_43000142	>jgi|Dappu1|245287|SNAP_00013345	jgi|Dappu1|97368|fgenesh1_pg.C_scaffold_6000435	>jgi|Dappu1|229387|estExt_fgenesh1_pg.C_1780010	>jgi|Dappu1|257235|SNAP_00025293
>jgi|Dappu1|106607|fgenesh1_pg.C_scaffold_43000143	>jgi|Dappu1|104677|fgenesh1_pg.C_scaffold_31000140	jgi|Dappu1|97369|fgenesh1_pg.C_scaffold_6000436	>jgi|Dappu1|229394|estExt_fgenesh1_pg.C_1810030	>jgi|Dappu1|228384|estExt_fgenesh1_pg.C_1000060
>jgi|Dappu1|106622|fgenesh1_pg.C_scaffold_43000158	>jgi|Dappu1|319846|NCBI_GNO_3100143	jgi|Dappu1|97370|fgenesh1_pg.C_scaffold_6000437	>jgi|Dappu1|229446|estExt_fgenesh1_pg.C_1870016	>jgi|Dappu1|300489|PASA_GEN_10000015
>jgi|Dappu1|106625|fgenesh1_pg.C_scaffold_43000161	>jgi|Dappu1|245291|SNAP_00013349	jgi|Dappu1|97371|fgenesh1_pg.C_scaffold_6000438	>jgi|Dappu1|229447|estExt_fgenesh1_pg.C_1870018	>jgi|Dappu1|257243|SNAP_00025301
>jgi|Dappu1|106628|fgenesh1_pg.C_scaffold_44000001	>jgi|Dappu1|245292|SNAP_00013350	jgi|Dappu1|97372|fgenesh1_pg.C_scaffold_6000439	>jgi|Dappu1|229448|estExt_fgenesh1_pg.C_1870019	>jgi|Dappu1|300515|PASA_GEN_10000045
>jgi|Dappu1|106646|fgenesh1_pg.C_scaffold_44000019	>jgi|Dappu1|319849|NCBI_GNO_3100146	jgi|Dappu1|236043|SNAP_00004101	>jgi|Dappu1|229458|estExt_fgenesh1_pg.C_1870041	>jgi|Dappu1|228400|estExt_fgenesh1_pg.C_1000077
>jgi|Dappu1|106647|fgenesh1_pg.C_scaffold_44000020	>jgi|Dappu1|319850|NCBI_GNO_3100147	jgi|Dappu1|221835|estExt_fgenesh1_pg.C_60437	>jgi|Dappu1|229616|estExt_fgenesh1_pg.C_2190023	>jgi|Dappu1|328190|NCBI_GNO_10000079
>jgi|Dappu1|106649|fgenesh1_pg.C_scaffold_44000022	>jgi|Dappu1|245298|SNAP_00013356	jgi|Dappu1|221836|estExt_fgenesh1_pg.C_60438	>jgi|Dappu1|229617|estExt_fgenesh1_pg.C_2190027	>jgi|Dappu1|228404|estExt_fgenesh1_pg.C_1000084
>jgi|Dappu1|106650|fgenesh1_pg.C_scaffold_44000023	>jgi|Dappu1|319854|NCBI_GNO_3100151	jgi|Dappu1|236047|SNAP_00004105	>jgi|Dappu1|229695|estExt_fgenesh1_pg.C_2430004	>jgi|Dappu1|257272|SNAP_00025330
>jgi|Dappu1|106651|fgenesh1_pg.C_scaffold_44000024	>jgi|Dappu1|104683|fgenesh1_pg.C_scaffold_31000146	jgi|Dappu1|236048|SNAP_00004106	>jgi|Dappu1|229747|estExt_fgenesh1_pg.C_2730004	>jgi|Dappu1|257277|SNAP_00025335
>jgi|Dappu1|106652|fgenesh1_pg.C_scaffold_44000025	>jgi|Dappu1|104687|fgenesh1_pg.C_scaffold_31000150	jgi|Dappu1|236049|SNAP_00004107	>jgi|Dappu1|229749|estExt_fgenesh1_pg.C_2730008	>jgi|Dappu1|257278|SNAP_00025336
>jgi|Dappu1|106655|fgenesh1_pg.C_scaffold_44000028	>jgi|Dappu1|319860|NCBI_GNO_3100157	jgi|Dappu1|312649|NCBI_GNO_0600454	>jgi|Dappu1|229977|estExt_fgenesh1_pg.C_11210001	>jgi|Dappu1|300526|PASA_GEN_10000059
>jgi|Dappu1|106658|fgenesh1_pg.C_scaffold_44000031	>jgi|Dappu1|319861|NCBI_GNO_3100158	jgi|Dappu1|236050|SNAP_00004108	>jgi|Dappu1|230056|estExt_fgenesh1_pg.C_65480001	>jgi|Dappu1|110319|fgenesh1_pg.C_scaffold_73000027
>jgi|Dappu1|106660|fgenesh1_pg.C_scaffold_44000033	>jgi|Dappu1|99395|fgenesh1_pg.C_scaffold_12000004	jgi|Dappu1|236051|SNAP_00004109	>jgi|Dappu1|230064|estExt_fgenesh1_pg.C_151220001	>jgi|Dappu1|58492|e_gw1.73.15.1
>jgi|Dappu1|106661|fgenesh1_pg.C_scaffold_44000034	>jgi|Dappu1|99409|fgenesh1_pg.C_scaffold_12000018	jgi|Dappu1|236052|SNAP_00004110	>jgi|Dappu1|230431|estExt_fgenesh1_kg.C_60018	>jgi|Dappu1|325866|NCBI_GNO_7300069
>jgi|Dappu1|106662|fgenesh1_pg.C_scaffold_44000035	>jgi|Dappu1|238563|SNAP_00006621	jgi|Dappu1|236053|SNAP_00004111	>jgi|Dappu1|230618|estExt_fgenesh1_kg.C_130001	>jgi|Dappu1|110343|fgenesh1_pg.C_scaffold_73000051
>jgi|Dappu1|106664|fgenesh1_pg.C_scaffold_44000037	>jgi|Dappu1|238566|SNAP_00006624	jgi|Dappu1|312654|NCBI_GNO_0600459	>jgi|Dappu1|230761|estExt_fgenesh1_kg.C_170031	>jgi|Dappu1|325877|NCBI_GNO_7300080
>jgi|Dappu1|106665|fgenesh1_pg.C_scaffold_44000038	>jgi|Dappu1|238567|SNAP_00006625	jgi|Dappu1|312655|NCBI_GNO_0600460	>jgi|Dappu1|230778|estExt_fgenesh1_kg.C_180010	>jgi|Dappu1|308059|PASA_GEN_7300032
>jgi|Dappu1|106666|fgenesh1_pg.C_scaffold_44000039	>jgi|Dappu1|99414|fgenesh1_pg.C_scaffold_12000023	jgi|Dappu1|312660|NCBI_GNO_0600465	>jgi|Dappu1|230781|estExt_fgenesh1_kg.C_180013	>jgi|Dappu1|259161|SNAP_00027219
>jgi|Dappu1|106668|fgenesh1_pg.C_scaffold_44000041	>jgi|Dappu1|238569|SNAP_00006627	jgi|Dappu1|312661|NCBI_GNO_0600466	>jgi|Dappu1|230784|estExt_fgenesh1_kg.C_180019	>jgi|Dappu1|228800|estExt_fgenesh1_pg.C_1210027
>jgi|Dappu1|106685|fgenesh1_pg.C_scaffold_44000058	>jgi|Dappu1|238570|SNAP_00006628	jgi|Dappu1|312664|NCBI_GNO_0600469	>jgi|Dappu1|230857|estExt_fgenesh1_kg.C_210017	>jgi|Dappu1|259196|SNAP_00027254
>jgi|Dappu1|106691|fgenesh1_pg.C_scaffold_44000064	>jgi|Dappu1|238573|SNAP_00006631	jgi|Dappu1|236065|SNAP_00004123	>jgi|Dappu1|231205|estExt_fgenesh1_kg.C_480001	>jgi|Dappu1|259214|SNAP_00027272
>jgi|Dappu1|106693|fgenesh1_pg.C_scaffold_44000066	>jgi|Dappu1|238576|SNAP_00006634	jgi|Dappu1|236069|SNAP_00004127	>jgi|Dappu1|231459|estExt_fgenesh1_kg.C_790004	>jgi|Dappu1|259215|SNAP_00027273
>jgi|Dappu1|106694|fgenesh1_pg.C_scaffold_44000067	>jgi|Dappu1|238577|SNAP_00006635	jgi|Dappu1|97395|fgenesh1_pg.C_scaffold_6000462	>jgi|Dappu1|231486|estExt_fgenesh1_kg.C_860005	>jgi|Dappu1|329536|NCBI_GNO_12100073
>jgi|Dappu1|106695|fgenesh1_pg.C_scaffold_44000068	>jgi|Dappu1|238578|SNAP_00006636	jgi|Dappu1|236072|SNAP_00004130	>jgi|Dappu1|231491|estExt_fgenesh1_kg.C_860012	>jgi|Dappu1|259242|SNAP_00027300
>jgi|Dappu1|106696|fgenesh1_pg.C_scaffold_44000069	>jgi|Dappu1|238579|SNAP_00006637	jgi|Dappu1|312673|NCBI_GNO_0600478	>jgi|Dappu1|231560|estExt_fgenesh1_kg.C_910002	>jgi|Dappu1|105535|fgenesh1_pg.C_scaffold_37000003
>jgi|Dappu1|106700|fgenesh1_pg.C_scaffold_44000073	>jgi|Dappu1|238580|SNAP_00006638	jgi|Dappu1|236074|SNAP_00004132	>jgi|Dappu1|23160|gw1.14.172.1	>jgi|Dappu1|320763|NCBI_GNO_3700005
>jgi|Dappu1|106705|fgenesh1_pg.C_scaffold_44000078	>jgi|Dappu1|238581|SNAP_00006639	jgi|Dappu1|312676|NCBI_GNO_0600481	>jgi|Dappu1|23177|gw1.13.228.1	>jgi|Dappu1|320770|NCBI_GNO_3700012
>jgi|Dappu1|106706|fgenesh1_pg.C_scaffold_44000079	>jgi|Dappu1|238585|SNAP_00006643	jgi|Dappu1|312677|NCBI_GNO_0600482	>jgi|Dappu1|231784|estExt_fgenesh1_kg.C_1450003	>jgi|Dappu1|246727|SNAP_00014785
>jgi|Dappu1|106708|fgenesh1_pg.C_scaffold_44000081	>jgi|Dappu1|99422|fgenesh1_pg.C_scaffold_12000031	jgi|Dappu1|236077|SNAP_00004135	>jgi|Dappu1|231816|estExt_fgenesh1_kg.C_1780001	>jgi|Dappu1|105591|fgenesh1_pg.C_scaffold_37000059
>jgi|Dappu1|106710|fgenesh1_pg.C_scaffold_44000083	>jgi|Dappu1|238587|SNAP_00006645	jgi|Dappu1|236078|SNAP_00004136	>jgi|Dappu1|231919|estExt_fgenesh1_kg.C_5090001	>jgi|Dappu1|246760|SNAP_00014818
>jgi|Dappu1|106711|fgenesh1_pg.C_scaffold_44000084	>jgi|Dappu1|238588|SNAP_00006646	jgi|Dappu1|236079|SNAP_00004137	>jgi|Dappu1|232095|SNAP_00000153	>jgi|Dappu1|316210|NCBI_GNO_1700004
>jgi|Dappu1|106723|fgenesh1_pg.C_scaffold_44000096	>jgi|Dappu1|314603|NCBI_GNO_1200027	jgi|Dappu1|236080|SNAP_00004138	>jgi|Dappu1|232096|SNAP_00000154	>jgi|Dappu1|316227|NCBI_GNO_1700021
>jgi|Dappu1|106728|fgenesh1_pg.C_scaffold_44000101	>jgi|Dappu1|222874|estExt_fgenesh1_pg.C_120031	jgi|Dappu1|236081|SNAP_00004139	>jgi|Dappu1|232164|SNAP_00000222	>jgi|Dappu1|223598|estExt_fgenesh1_pg.C_170024
>jgi|Dappu1|106731|fgenesh1_pg.C_scaffold_44000104	>jgi|Dappu1|238593|SNAP_00006651	jgi|Dappu1|236082|SNAP_00004140	>jgi|Dappu1|232167|SNAP_00000225	>jgi|Dappu1|316232|NCBI_GNO_1700026
>jgi|Dappu1|106735|fgenesh1_pg.C_scaffold_44000108	>jgi|Dappu1|238594|SNAP_00006652	jgi|Dappu1|312681|NCBI_GNO_0600486	>jgi|Dappu1|232192|SNAP_00000250	>jgi|Dappu1|25868|gw1.17.286.1
>jgi|Dappu1|106745|fgenesh1_pg.C_scaffold_44000118	>jgi|Dappu1|99428|fgenesh1_pg.C_scaffold_12000037	jgi|Dappu1|97404|fgenesh1_pg.C_scaffold_6000471	>jgi|Dappu1|232382|SNAP_00000440	>jgi|Dappu1|48836|e_gw1.17.129.1
>jgi|Dappu1|106748|fgenesh1_pg.C_scaffold_44000121	>jgi|Dappu1|238599|SNAP_00006657	jgi|Dappu1|221844|estExt_fgenesh1_pg.C_60467	>jgi|Dappu1|232609|SNAP_00000667	>jgi|Dappu1|316257|NCBI_GNO_1700051
>jgi|Dappu1|106755|fgenesh1_pg.C_scaffold_44000128	>jgi|Dappu1|99433|fgenesh1_pg.C_scaffold_12000042	jgi|Dappu1|236090|SNAP_00004148	>jgi|Dappu1|232779|SNAP_00000837	>jgi|Dappu1|48683|e_gw1.17.465.1
>jgi|Dappu1|106757|fgenesh1_pg.C_scaffold_44000130	>jgi|Dappu1|99435|fgenesh1_pg.C_scaffold_12000044	jgi|Dappu1|236091|SNAP_00004149	>jgi|Dappu1|232990|SNAP_00001048	>jgi|Dappu1|316307|NCBI_GNO_1700101
>jgi|Dappu1|106759|fgenesh1_pg.C_scaffold_44000132	>jgi|Dappu1|222879|estExt_fgenesh1_pg.C_120044	jgi|Dappu1|236092|SNAP_00004150	>jgi|Dappu1|233202|SNAP_00001260	>jgi|Dappu1|101154|fgenesh1_pg.C_scaffold_17000105
>jgi|Dappu1|106760|fgenesh1_pg.C_scaffold_44000133	>jgi|Dappu1|314619|NCBI_GNO_1200043	jgi|Dappu1|236095|SNAP_00004153	>jgi|Dappu1|233208|SNAP_00001266	>jgi|Dappu1|210408|estExt_Genewise1.C_170099
>jgi|Dappu1|106761|fgenesh1_pg.C_scaffold_44000134	>jgi|Dappu1|238610|SNAP_00006668	jgi|Dappu1|236096|SNAP_00004154	>jgi|Dappu1|233221|SNAP_00001279	>jgi|Dappu1|316324|NCBI_GNO_1700119
>jgi|Dappu1|106762|fgenesh1_pg.C_scaffold_44000135	>jgi|Dappu1|238611|SNAP_00006669	jgi|Dappu1|236098|SNAP_00004156	>jgi|Dappu1|233474|SNAP_00001532	>jgi|Dappu1|101175|fgenesh1_pg.C_scaffold_17000126
>jgi|Dappu1|106763|fgenesh1_pg.C_scaffold_44000136	>jgi|Dappu1|238612|SNAP_00006670	jgi|Dappu1|312692|NCBI_GNO_0600497	>jgi|Dappu1|233531|SNAP_00001589	>jgi|Dappu1|101181|fgenesh1_pg.C_scaffold_17000132
>jgi|Dappu1|106771|fgenesh1_pg.C_scaffold_45000007	>jgi|Dappu1|314623|NCBI_GNO_1200047	jgi|Dappu1|236100|SNAP_00004158	>jgi|Dappu1|233541|SNAP_00001599	>jgi|Dappu1|316354|NCBI_GNO_1700149
>jgi|Dappu1|106797|fgenesh1_pg.C_scaffold_45000033	>jgi|Dappu1|314624|NCBI_GNO_1200048	jgi|Dappu1|221846|estExt_fgenesh1_pg.C_60473	>jgi|Dappu1|233546|SNAP_00001604	>jgi|Dappu1|240815|SNAP_00008873
>jgi|Dappu1|106799|fgenesh1_pg.C_scaffold_45000035	>jgi|Dappu1|238621|SNAP_00006679	jgi|Dappu1|236102|SNAP_00004160	>jgi|Dappu1|233619|SNAP_00001677	>jgi|Dappu1|240816|SNAP_00008874
>jgi|Dappu1|106800|fgenesh1_pg.C_scaffold_45000036	>jgi|Dappu1|238628|SNAP_00006686	jgi|Dappu1|236106|SNAP_00004164	>jgi|Dappu1|233912|SNAP_00001970	>jgi|Dappu1|240822|SNAP_00008880
>jgi|Dappu1|106802|fgenesh1_pg.C_scaffold_45000038	>jgi|Dappu1|314638|NCBI_GNO_1200062	jgi|Dappu1|236110|SNAP_00004168	>jgi|Dappu1|233913|SNAP_00001971	>jgi|Dappu1|240830|SNAP_00008888
>jgi|Dappu1|106804|fgenesh1_pg.C_scaffold_45000040	>jgi|Dappu1|238637|SNAP_00006695	jgi|Dappu1|236114|SNAP_00004172	>jgi|Dappu1|233957|SNAP_00002015	>jgi|Dappu1|316370|NCBI_GNO_1700165
>jgi|Dappu1|106807|fgenesh1_pg.C_scaffold_45000043	>jgi|Dappu1|238640|SNAP_00006698	jgi|Dappu1|97425|fgenesh1_pg.C_scaffold_6000492	>jgi|Dappu1|234007|SNAP_00002065	>jgi|Dappu1|240849|SNAP_00008907
>jgi|Dappu1|106812|fgenesh1_pg.C_scaffold_45000048	>jgi|Dappu1|314641|NCBI_GNO_1200065	jgi|Dappu1|312704|NCBI_GNO_0600509	>jgi|Dappu1|234055|SNAP_00002113	>jgi|Dappu1|316385|NCBI_GNO_1700180
>jgi|Dappu1|106817|fgenesh1_pg.C_scaffold_45000053	>jgi|Dappu1|314642|NCBI_GNO_1200066	jgi|Dappu1|236120|SNAP_00004178	>jgi|Dappu1|234063|SNAP_00002121	>jgi|Dappu1|240858|SNAP_00008916
>jgi|Dappu1|106819|fgenesh1_pg.C_scaffold_45000055	>jgi|Dappu1|238642|SNAP_00006700	jgi|Dappu1|192749|estExt_Genewise1Plus.C_60824	>jgi|Dappu1|234173|SNAP_00002231	>jgi|Dappu1|101230|fgenesh1_pg.C_scaffold_17000181
>jgi|Dappu1|106820|fgenesh1_pg.C_scaffold_45000056	>jgi|Dappu1|99476|fgenesh1_pg.C_scaffold_12000085	jgi|Dappu1|312710|NCBI_GNO_0600516	>jgi|Dappu1|234299|SNAP_00002357	>jgi|Dappu1|240869|SNAP_00008927
>jgi|Dappu1|106824|fgenesh1_pg.C_scaffold_45000060	>jgi|Dappu1|238644|SNAP_00006702	jgi|Dappu1|221856|estExt_fgenesh1_pg.C_60502	>jgi|Dappu1|234300|SNAP_00002358	>jgi|Dappu1|302361|PASA_GEN_1700103
>jgi|Dappu1|106826|fgenesh1_pg.C_scaffold_45000062	>jgi|Dappu1|238645|SNAP_00006703	jgi|Dappu1|97441|fgenesh1_pg.C_scaffold_6000508	>jgi|Dappu1|23444|gw1.37.94.1	>jgi|Dappu1|316422|NCBI_GNO_1700217
>jgi|Dappu1|106829|fgenesh1_pg.C_scaffold_45000065	>jgi|Dappu1|238647|SNAP_00006705	jgi|Dappu1|307163|PASA_GEN_0600145	>jgi|Dappu1|234477|SNAP_00002535	>jgi|Dappu1|240897|SNAP_00008955
>jgi|Dappu1|106830|fgenesh1_pg.C_scaffold_45000066	>jgi|Dappu1|314646|NCBI_GNO_1200070	jgi|Dappu1|221858|estExt_fgenesh1_pg.C_60505	>jgi|Dappu1|234478|SNAP_00002536	>jgi|Dappu1|240905|SNAP_00008963
>jgi|Dappu1|106832|fgenesh1_pg.C_scaffold_45000068	>jgi|Dappu1|238650|SNAP_00006708	jgi|Dappu1|221859|estExt_fgenesh1_pg.C_60506	>jgi|Dappu1|234686|SNAP_00002744	>jgi|Dappu1|302366|PASA_GEN_1700108
>jgi|Dappu1|106834|fgenesh1_pg.C_scaffold_45000070	>jgi|Dappu1|238652|SNAP_00006710	jgi|Dappu1|307164|PASA_GEN_0600146	>jgi|Dappu1|234773|SNAP_00002831	>jgi|Dappu1|302368|PASA_GEN_1700111
>jgi|Dappu1|106838|fgenesh1_pg.C_scaffold_45000074	>jgi|Dappu1|314649|NCBI_GNO_1200073	jgi|Dappu1|97446|fgenesh1_pg.C_scaffold_6000513	>jgi|Dappu1|234791|SNAP_00002849	>jgi|Dappu1|302370|PASA_GEN_1700114
>jgi|Dappu1|106850|fgenesh1_pg.C_scaffold_45000086	>jgi|Dappu1|238653|SNAP_00006711	jgi|Dappu1|312721|NCBI_GNO_0600527	>jgi|Dappu1|234792|SNAP_00002850	>jgi|Dappu1|223703|estExt_fgenesh1_pg.C_170257
>jgi|Dappu1|106860|fgenesh1_pg.C_scaffold_45000096	>jgi|Dappu1|314651|NCBI_GNO_1200075	jgi|Dappu1|97448|fgenesh1_pg.C_scaffold_6000515	>jgi|Dappu1|234882|SNAP_00002940	>jgi|Dappu1|101349|fgenesh1_pg.C_scaffold_17000300
>jgi|Dappu1|106864|fgenesh1_pg.C_scaffold_45000100	>jgi|Dappu1|314654|NCBI_GNO_1200078	jgi|Dappu1|307167|PASA_GEN_0600149	>jgi|Dappu1|234893|SNAP_00002951	>jgi|Dappu1|316518|NCBI_GNO_1700313
>jgi|Dappu1|106867|fgenesh1_pg.C_scaffold_45000103	>jgi|Dappu1|314655|NCBI_GNO_1200079	jgi|Dappu1|307168|PASA_GEN_0600150	>jgi|Dappu1|235029|SNAP_00003087	>jgi|Dappu1|316523|NCBI_GNO_1700318
>jgi|Dappu1|106875|fgenesh1_pg.C_scaffold_45000111	>jgi|Dappu1|238657|SNAP_00006715	jgi|Dappu1|236137|SNAP_00004195	>jgi|Dappu1|235068|SNAP_00003126	>jgi|Dappu1|316536|NCBI_GNO_1700331
>jgi|Dappu1|106876|fgenesh1_pg.C_scaffold_45000112	>jgi|Dappu1|314660|NCBI_GNO_1200084	jgi|Dappu1|97453|fgenesh1_pg.C_scaffold_6000520	>jgi|Dappu1|235069|SNAP_00003127	>jgi|Dappu1|316547|NCBI_GNO_1700342
>jgi|Dappu1|106877|fgenesh1_pg.C_scaffold_45000113	>jgi|Dappu1|238660|SNAP_00006718	jgi|Dappu1|312726|NCBI_GNO_0600532	>jgi|Dappu1|235654|SNAP_00003712	>jgi|Dappu1|316548|NCBI_GNO_1700343
>jgi|Dappu1|106881|fgenesh1_pg.C_scaffold_45000117	>jgi|Dappu1|222913|estExt_fgenesh1_pg.C_120095	jgi|Dappu1|312727|NCBI_GNO_0600533	>jgi|Dappu1|235664|SNAP_00003722	>jgi|Dappu1|223758|estExt_fgenesh1_pg.C_170364
>jgi|Dappu1|106886|fgenesh1_pg.C_scaffold_45000122	>jgi|Dappu1|238663|SNAP_00006721	jgi|Dappu1|304923|PASA_GEN_3100026	>jgi|Dappu1|235673|SNAP_00003731	>jgi|Dappu1|223767|estExt_fgenesh1_pg.C_170376
>jgi|Dappu1|106887|fgenesh1_pg.C_scaffold_45000123	>jgi|Dappu1|314670|NCBI_GNO_1200094	jgi|Dappu1|319706|NCBI_GNO_3100003	>jgi|Dappu1|235713|SNAP_00003771	>jgi|Dappu1|302336|PASA_GEN_1700043
>jgi|Dappu1|106889|fgenesh1_pg.C_scaffold_45000125	>jgi|Dappu1|99493|fgenesh1_pg.C_scaffold_12000102	jgi|Dappu1|319707|NCBI_GNO_3100004	>jgi|Dappu1|235842|SNAP_00003900	>jgi|Dappu1|254478|SNAP_00022536
>jgi|Dappu1|106890|fgenesh1_pg.C_scaffold_45000126	>jgi|Dappu1|99497|fgenesh1_pg.C_scaffold_12000106	jgi|Dappu1|245103|SNAP_00013161	>jgi|Dappu1|235863|SNAP_00003921	>jgi|Dappu1|59155|e_gw1.78.79.1
>jgi|Dappu1|106892|fgenesh1_pg.C_scaffold_45000128	>jgi|Dappu1|314679|NCBI_GNO_1200103	jgi|Dappu1|319711|NCBI_GNO_3100008	>jgi|Dappu1|235873|SNAP_00003931	>jgi|Dappu1|93282|fgenesh1_kg.C_scaffold_78000007
>jgi|Dappu1|106893|fgenesh1_pg.C_scaffold_45000129	>jgi|Dappu1|314682|NCBI_GNO_1200106	jgi|Dappu1|319715|NCBI_GNO_3100012	>jgi|Dappu1|235893|SNAP_00003951	>jgi|Dappu1|254525|SNAP_00022583
>jgi|Dappu1|106895|fgenesh1_pg.C_scaffold_45000131	>jgi|Dappu1|314698|NCBI_GNO_1200122	jgi|Dappu1|319717|NCBI_GNO_3100014	>jgi|Dappu1|235927|SNAP_00003985	>jgi|Dappu1|110834|fgenesh1_pg.C_scaffold_78000054
>jgi|Dappu1|106898|fgenesh1_pg.C_scaffold_45000134	>jgi|Dappu1|314699|NCBI_GNO_1200123	jgi|Dappu1|304926|PASA_GEN_3100029	>jgi|Dappu1|235946|SNAP_00004004	>jgi|Dappu1|110838|fgenesh1_pg.C_scaffold_78000058
>jgi|Dappu1|106899|fgenesh1_pg.C_scaffold_45000135	>jgi|Dappu1|238704|SNAP_00006762	jgi|Dappu1|304900|PASA_GEN_3100001	>jgi|Dappu1|235963|SNAP_00004021	>jgi|Dappu1|254559|SNAP_00022617
>jgi|Dappu1|106923|fgenesh1_pg.C_scaffold_46000024	>jgi|Dappu1|238705|SNAP_00006763	jgi|Dappu1|104560|fgenesh1_pg.C_scaffold_31000023	>jgi|Dappu1|235999|SNAP_00004057	>jgi|Dappu1|110855|fgenesh1_pg.C_scaffold_78000075
>jgi|Dappu1|106924|fgenesh1_pg.C_scaffold_46000025	>jgi|Dappu1|314708|NCBI_GNO_1200132	jgi|Dappu1|104561|fgenesh1_pg.C_scaffold_31000024	>jgi|Dappu1|236055|SNAP_00004113	>jgi|Dappu1|326317|NCBI_GNO_7800085
>jgi|Dappu1|106926|fgenesh1_pg.C_scaffold_46000027	>jgi|Dappu1|238711|SNAP_00006769	jgi|Dappu1|304902|PASA_GEN_3100003	>jgi|Dappu1|236061|SNAP_00004119	>jgi|Dappu1|110863|fgenesh1_pg.C_scaffold_78000083
>jgi|Dappu1|106939|fgenesh1_pg.C_scaffold_46000040	>jgi|Dappu1|99525|fgenesh1_pg.C_scaffold_12000134	jgi|Dappu1|319735|NCBI_GNO_3100032	>jgi|Dappu1|236093|SNAP_00004151	>jgi|Dappu1|308306|PASA_GEN_7800018
>jgi|Dappu1|106945|fgenesh1_pg.C_scaffold_46000046	>jgi|Dappu1|99526|fgenesh1_pg.C_scaffold_12000135	jgi|Dappu1|225189|estExt_fgenesh1_pg.C_310038	>jgi|Dappu1|236104|SNAP_00004162	>jgi|Dappu1|308307|PASA_GEN_7800019
>jgi|Dappu1|106953|fgenesh1_pg.C_scaffold_46000054	>jgi|Dappu1|99527|fgenesh1_pg.C_scaffold_12000136	jgi|Dappu1|104576|fgenesh1_pg.C_scaffold_31000039	>jgi|Dappu1|236105|SNAP_00004163	>jgi|Dappu1|226463|estExt_fgenesh1_pg.C_560009
>jgi|Dappu1|106972|fgenesh1_pg.C_scaffold_46000073	>jgi|Dappu1|99528|fgenesh1_pg.C_scaffold_12000137	jgi|Dappu1|104583|fgenesh1_pg.C_scaffold_31000046	>jgi|Dappu1|236108|SNAP_00004166	>jgi|Dappu1|108252|fgenesh1_pg.C_scaffold_56000028
>jgi|Dappu1|106981|fgenesh1_pg.C_scaffold_46000082	>jgi|Dappu1|238714|SNAP_00006772	jgi|Dappu1|104587|fgenesh1_pg.C_scaffold_31000050	>jgi|Dappu1|236145|SNAP_00004203	>jgi|Dappu1|108272|fgenesh1_pg.C_scaffold_56000048
>jgi|Dappu1|106986|fgenesh1_pg.C_scaffold_46000087	>jgi|Dappu1|238715|SNAP_00006773	jgi|Dappu1|104588|fgenesh1_pg.C_scaffold_31000051	>jgi|Dappu1|236160|SNAP_00004218	>jgi|Dappu1|251093|SNAP_00019151
>jgi|Dappu1|107003|fgenesh1_pg.C_scaffold_46000104	>jgi|Dappu1|238716|SNAP_00006774	jgi|Dappu1|245164|SNAP_00013222	>jgi|Dappu1|236247|SNAP_00004305	>jgi|Dappu1|306928|PASA_GEN_5600047
>jgi|Dappu1|107009|fgenesh1_pg.C_scaffold_46000110	>jgi|Dappu1|238722|SNAP_00006780	jgi|Dappu1|319754|NCBI_GNO_3100051	>jgi|Dappu1|236291|SNAP_00004349	>jgi|Dappu1|257054|SNAP_00025112
>jgi|Dappu1|107012|fgenesh1_pg.C_scaffold_46000113	>jgi|Dappu1|314719|NCBI_GNO_1200143	jgi|Dappu1|104595|fgenesh1_pg.C_scaffold_31000058	>jgi|Dappu1|236315|SNAP_00004373	>jgi|Dappu1|309453|PASA_GEN_9900046
>jgi|Dappu1|107014|fgenesh1_pg.C_scaffold_46000115	>jgi|Dappu1|314727|NCBI_GNO_1200151	jgi|Dappu1|245169|SNAP_00013227	>jgi|Dappu1|236316|SNAP_00004374	>jgi|Dappu1|112670|fgenesh1_pg.C_scaffold_99000012
>jgi|Dappu1|107031|fgenesh1_pg.C_scaffold_46000132	>jgi|Dappu1|238735|SNAP_00006793	jgi|Dappu1|104597|fgenesh1_pg.C_scaffold_31000060	>jgi|Dappu1|236344|SNAP_00004402	>jgi|Dappu1|328285|NCBI_GNO_9900009
>jgi|Dappu1|107032|fgenesh1_pg.C_scaffold_46000133	>jgi|Dappu1|314729|NCBI_GNO_1200153	jgi|Dappu1|304944|PASA_GEN_3100052	>jgi|Dappu1|236376|SNAP_00004434	>jgi|Dappu1|309469|PASA_GEN_9900066
>jgi|Dappu1|107033|fgenesh1_pg.C_scaffold_46000134	>jgi|Dappu1|99561|fgenesh1_pg.C_scaffold_12000170	jgi|Dappu1|104605|fgenesh1_pg.C_scaffold_31000068	>jgi|Dappu1|236384|SNAP_00004442	>jgi|Dappu1|328301|NCBI_GNO_9900025
>jgi|Dappu1|107036|fgenesh1_pg.C_scaffold_46000137	>jgi|Dappu1|99563|fgenesh1_pg.C_scaffold_12000172	jgi|Dappu1|104611|fgenesh1_pg.C_scaffold_31000074	>jgi|Dappu1|236411|SNAP_00004469	>jgi|Dappu1|309438|PASA_GEN_9900021
>jgi|Dappu1|107043|fgenesh1_pg.C_scaffold_46000144	>jgi|Dappu1|238745|SNAP_00006803	jgi|Dappu1|319765|NCBI_GNO_3100062	>jgi|Dappu1|236412|SNAP_00004470	>jgi|Dappu1|112716|fgenesh1_pg.C_scaffold_99000058
>jgi|Dappu1|107054|fgenesh1_pg.C_scaffold_46000155	>jgi|Dappu1|238746|SNAP_00006804	jgi|Dappu1|104614|fgenesh1_pg.C_scaffold_31000077	>jgi|Dappu1|236485|SNAP_00004543	>jgi|Dappu1|309451|PASA_GEN_9900042
>jgi|Dappu1|107058|fgenesh1_pg.C_scaffold_46000159	>jgi|Dappu1|238750|SNAP_00006808	jgi|Dappu1|104615|fgenesh1_pg.C_scaffold_31000078	>jgi|Dappu1|236488|SNAP_00004546	>jgi|Dappu1|307414|PASA_GEN_6300001
>jgi|Dappu1|107072|fgenesh1_pg.C_scaffold_47000014	>jgi|Dappu1|238751|SNAP_00006809	jgi|Dappu1|104617|fgenesh1_pg.C_scaffold_31000080	>jgi|Dappu1|236511|SNAP_00004569	>jgi|Dappu1|109115|fgenesh1_pg.C_scaffold_63000004
>jgi|Dappu1|107074|fgenesh1_pg.C_scaffold_47000016	>jgi|Dappu1|238752|SNAP_00006810	jgi|Dappu1|245200|SNAP_00013258	>jgi|Dappu1|236521|SNAP_00004579	>jgi|Dappu1|215219|estExt_Genewise1.C_630038
>jgi|Dappu1|107078|fgenesh1_pg.C_scaffold_47000020	>jgi|Dappu1|238755|SNAP_00006813	jgi|Dappu1|304910|PASA_GEN_3100013	>jgi|Dappu1|236610|SNAP_00004668	>jgi|Dappu1|307423|PASA_GEN_6300012
>jgi|Dappu1|107086|fgenesh1_pg.C_scaffold_47000028	>jgi|Dappu1|238758|SNAP_00006816	jgi|Dappu1|245211|SNAP_00013269	>jgi|Dappu1|236611|SNAP_00004669	>jgi|Dappu1|307428|PASA_GEN_6300018
>jgi|Dappu1|107099|fgenesh1_pg.C_scaffold_47000041	>jgi|Dappu1|238759|SNAP_00006817	jgi|Dappu1|304955|PASA_GEN_3100063	>jgi|Dappu1|236612|SNAP_00004670	>jgi|Dappu1|307436|PASA_GEN_6300027
>jgi|Dappu1|107104|fgenesh1_pg.C_scaffold_47000046	>jgi|Dappu1|99571|fgenesh1_pg.C_scaffold_12000180	jgi|Dappu1|245225|SNAP_00013283	>jgi|Dappu1|237158|SNAP_00005216	>jgi|Dappu1|307445|PASA_GEN_6300038
>jgi|Dappu1|107109|fgenesh1_pg.C_scaffold_47000051	>jgi|Dappu1|99576|fgenesh1_pg.C_scaffold_12000185	jgi|Dappu1|104629|fgenesh1_pg.C_scaffold_31000092	>jgi|Dappu1|237169|SNAP_00005227	>jgi|Dappu1|307484|PASA_GEN_6300081
>jgi|Dappu1|107136|fgenesh1_pg.C_scaffold_47000078	>jgi|Dappu1|99579|fgenesh1_pg.C_scaffold_12000188	jgi|Dappu1|245229|SNAP_00013287	>jgi|Dappu1|237175|SNAP_00005233	>jgi|Dappu1|252239|SNAP_00020297
>jgi|Dappu1|107153|fgenesh1_pg.C_scaffold_47000095	>jgi|Dappu1|222961|estExt_fgenesh1_pg.C_120188	jgi|Dappu1|319784|NCBI_GNO_3100081	>jgi|Dappu1|237176|SNAP_00005234	>jgi|Dappu1|226924|estExt_fgenesh1_pg.C_630126
>jgi|Dappu1|107155|fgenesh1_pg.C_scaffold_47000097	>jgi|Dappu1|222963|estExt_fgenesh1_pg.C_120190	jgi|Dappu1|245231|SNAP_00013289	>jgi|Dappu1|237177|SNAP_00005235	>jgi|Dappu1|109732|fgenesh1_pg.C_scaffold_68000002
>jgi|Dappu1|107176|fgenesh1_pg.C_scaffold_47000118	>jgi|Dappu1|99586|fgenesh1_pg.C_scaffold_12000195	jgi|Dappu1|104631|fgenesh1_pg.C_scaffold_31000094	>jgi|Dappu1|237228|SNAP_00005286	>jgi|Dappu1|109741|fgenesh1_pg.C_scaffold_68000011
>jgi|Dappu1|107214|fgenesh1_pg.C_scaffold_48000022	>jgi|Dappu1|314756|NCBI_GNO_1200180	jgi|Dappu1|104632|fgenesh1_pg.C_scaffold_31000095	>jgi|Dappu1|237263|SNAP_00005321	>jgi|Dappu1|109754|fgenesh1_pg.C_scaffold_68000024
>jgi|Dappu1|107216|fgenesh1_pg.C_scaffold_48000024	>jgi|Dappu1|238775|SNAP_00006833	jgi|Dappu1|245234|SNAP_00013292	>jgi|Dappu1|237294|SNAP_00005352	>jgi|Dappu1|325284|NCBI_GNO_6800075
>jgi|Dappu1|107218|fgenesh1_pg.C_scaffold_48000026	>jgi|Dappu1|238776|SNAP_00006834	jgi|Dappu1|319787|NCBI_GNO_3100084	>jgi|Dappu1|237349|SNAP_00005407	>jgi|Dappu1|321917|NCBI_GNO_4400003
>jgi|Dappu1|107225|fgenesh1_pg.C_scaffold_48000033	>jgi|Dappu1|238777|SNAP_00006835	jgi|Dappu1|245236|SNAP_00013294	>jgi|Dappu1|237374|SNAP_00005432	>jgi|Dappu1|321961|NCBI_GNO_4400050
>jgi|Dappu1|107227|fgenesh1_pg.C_scaffold_48000035	>jgi|Dappu1|230613|estExt_fgenesh1_kg.C_120027	jgi|Dappu1|104634|fgenesh1_pg.C_scaffold_31000097	>jgi|Dappu1|237406|SNAP_00005464	>jgi|Dappu1|321989|NCBI_GNO_4400078
>jgi|Dappu1|107229|fgenesh1_pg.C_scaffold_48000037	>jgi|Dappu1|222971|estExt_fgenesh1_pg.C_120200	jgi|Dappu1|104636|fgenesh1_pg.C_scaffold_31000099	>jgi|Dappu1|237515|SNAP_00005573	>jgi|Dappu1|106713|fgenesh1_pg.C_scaffold_44000086
>jgi|Dappu1|107233|fgenesh1_pg.C_scaffold_48000041	>jgi|Dappu1|301127|PASA_GEN_1200058	jgi|Dappu1|104637|fgenesh1_pg.C_scaffold_31000100	>jgi|Dappu1|237743|SNAP_00005801	>jgi|Dappu1|306071|PASA_GEN_4400022
>jgi|Dappu1|107235|fgenesh1_pg.C_scaffold_48000043	>jgi|Dappu1|314769|NCBI_GNO_1200194	jgi|Dappu1|104638|fgenesh1_pg.C_scaffold_31000101	>jgi|Dappu1|237832|SNAP_00005890	>jgi|Dappu1|322069|NCBI_GNO_4400158
>jgi|Dappu1|107237|fgenesh1_pg.C_scaffold_48000045	>jgi|Dappu1|99605|fgenesh1_pg.C_scaffold_12000214	jgi|Dappu1|319797|NCBI_GNO_3100094	>jgi|Dappu1|237865|SNAP_00005923	>jgi|Dappu1|248606|SNAP_00016664
>jgi|Dappu1|107240|fgenesh1_pg.C_scaffold_48000048	>jgi|Dappu1|99611|fgenesh1_pg.C_scaffold_12000220	jgi|Dappu1|104643|fgenesh1_pg.C_scaffold_31000106	>jgi|Dappu1|237975|SNAP_00006033	>jgi|Dappu1|106758|fgenesh1_pg.C_scaffold_44000131
>jgi|Dappu1|107243|fgenesh1_pg.C_scaffold_48000051	>jgi|Dappu1|99612|fgenesh1_pg.C_scaffold_12000221	jgi|Dappu1|319801|NCBI_GNO_3100098	>jgi|Dappu1|237981|SNAP_00006039	>jgi|Dappu1|322075|NCBI_GNO_4400164
>jgi|Dappu1|107249|fgenesh1_pg.C_scaffold_48000057	>jgi|Dappu1|99614|fgenesh1_pg.C_scaffold_12000223	jgi|Dappu1|104646|fgenesh1_pg.C_scaffold_31000109	>jgi|Dappu1|237987|SNAP_00006045	>jgi|Dappu1|324913|NCBI_GNO_6600002
>jgi|Dappu1|107250|fgenesh1_pg.C_scaffold_48000058	>jgi|Dappu1|99617|fgenesh1_pg.C_scaffold_12000226	jgi|Dappu1|245256|SNAP_00013314	>jgi|Dappu1|238022|SNAP_00006080	>jgi|Dappu1|109473|fgenesh1_pg.C_scaffold_66000020
>jgi|Dappu1|107260|fgenesh1_pg.C_scaffold_48000068	>jgi|Dappu1|238799|SNAP_00006857	jgi|Dappu1|319806|NCBI_GNO_3100103	>jgi|Dappu1|238038|SNAP_00006096	>jgi|Dappu1|227008|estExt_fgenesh1_pg.C_660037
>jgi|Dappu1|107267|fgenesh1_pg.C_scaffold_48000075	>jgi|Dappu1|238800|SNAP_00006858	jgi|Dappu1|319807|NCBI_GNO_3100104	>jgi|Dappu1|238055|SNAP_00006113	>jgi|Dappu1|252692|SNAP_00020750
>jgi|Dappu1|107269|fgenesh1_pg.C_scaffold_48000077	>jgi|Dappu1|314776|NCBI_GNO_1200201	jgi|Dappu1|319808|NCBI_GNO_3100105	>jgi|Dappu1|238090|SNAP_00006148	>jgi|Dappu1|200426|estExt_Genewise1Plus.C_660033
>jgi|Dappu1|107270|fgenesh1_pg.C_scaffold_48000078	>jgi|Dappu1|99620|fgenesh1_pg.C_scaffold_12000229	jgi|Dappu1|104649|fgenesh1_pg.C_scaffold_31000112	>jgi|Dappu1|238135|SNAP_00006193	>jgi|Dappu1|109560|fgenesh1_pg.C_scaffold_66000107
>jgi|Dappu1|107274|fgenesh1_pg.C_scaffold_48000082	>jgi|Dappu1|314778|NCBI_GNO_1200203	jgi|Dappu1|319813|NCBI_GNO_3100110	>jgi|Dappu1|238326|SNAP_00006384	>jgi|Dappu1|252788|SNAP_00020846
>jgi|Dappu1|107278|fgenesh1_pg.C_scaffold_48000086	>jgi|Dappu1|238803|SNAP_00006861	jgi|Dappu1|104650|fgenesh1_pg.C_scaffold_31000113	>jgi|Dappu1|238436|SNAP_00006494	>jgi|Dappu1|325550|NCBI_GNO_7100004
>jgi|Dappu1|107279|fgenesh1_pg.C_scaffold_48000087	>jgi|Dappu1|238804|SNAP_00006862	jgi|Dappu1|319815|NCBI_GNO_3100112	>jgi|Dappu1|238519|SNAP_00006577	>jgi|Dappu1|325574|NCBI_GNO_7100028
>jgi|Dappu1|107280|fgenesh1_pg.C_scaffold_48000088	>jgi|Dappu1|314780|NCBI_GNO_1200205	jgi|Dappu1|104652|fgenesh1_pg.C_scaffold_31000115	>jgi|Dappu1|238571|SNAP_00006629	>jgi|Dappu1|325589|NCBI_GNO_7100043
>jgi|Dappu1|107283|fgenesh1_pg.C_scaffold_48000091	>jgi|Dappu1|238807|SNAP_00006865	jgi|Dappu1|304912|PASA_GEN_3100015	>jgi|Dappu1|238649|SNAP_00006707	>jgi|Dappu1|58269|e_gw1.71.45.1
>jgi|Dappu1|107298|fgenesh1_pg.C_scaffold_48000106	>jgi|Dappu1|238808|SNAP_00006866	jgi|Dappu1|304958|PASA_GEN_3100066	>jgi|Dappu1|238738|SNAP_00006796	>jgi|Dappu1|325612|NCBI_GNO_7100066
>jgi|Dappu1|107302|fgenesh1_pg.C_scaffold_48000110	>jgi|Dappu1|314784|NCBI_GNO_1200209	jgi|Dappu1|319819|NCBI_GNO_3100116	>jgi|Dappu1|238815|SNAP_00006873	>jgi|Dappu1|307970|PASA_GEN_7100004
>jgi|Dappu1|107304|fgenesh1_pg.C_scaffold_48000112	>jgi|Dappu1|99625|fgenesh1_pg.C_scaffold_12000234	jgi|Dappu1|319820|NCBI_GNO_3100117	>jgi|Dappu1|238893|SNAP_00006951	>jgi|Dappu1|303715|PASA_GEN_2300075
>jgi|Dappu1|107311|fgenesh1_pg.C_scaffold_48000119	>jgi|Dappu1|238810|SNAP_00006868	jgi|Dappu1|319836|NCBI_GNO_3100133	>jgi|Dappu1|238988|SNAP_00007046	>jgi|Dappu1|224358|estExt_fgenesh1_pg.C_230037
>jgi|Dappu1|107312|fgenesh1_pg.C_scaffold_48000120	>jgi|Dappu1|238811|SNAP_00006869	jgi|Dappu1|104670|fgenesh1_pg.C_scaffold_31000133	>jgi|Dappu1|239024|SNAP_00007082	>jgi|Dappu1|224364|estExt_fgenesh1_pg.C_230053
>jgi|Dappu1|107313|fgenesh1_pg.C_scaffold_48000121	>jgi|Dappu1|238812|SNAP_00006870	jgi|Dappu1|304919|PASA_GEN_3100022	>jgi|Dappu1|239047|SNAP_00007105	>jgi|Dappu1|303733|PASA_GEN_2300095
>jgi|Dappu1|107316|fgenesh1_pg.C_scaffold_48000124	>jgi|Dappu1|99627|fgenesh1_pg.C_scaffold_12000236	jgi|Dappu1|319843|NCBI_GNO_3100140	>jgi|Dappu1|239048|SNAP_00007106	>jgi|Dappu1|303737|PASA_GEN_2300100
>jgi|Dappu1|107323|fgenesh1_pg.C_scaffold_49000005	>jgi|Dappu1|238816|SNAP_00006874	jgi|Dappu1|245286|SNAP_00013344	>jgi|Dappu1|239081|SNAP_00007139	>jgi|Dappu1|303742|PASA_GEN_2300106
>jgi|Dappu1|107336|fgenesh1_pg.C_scaffold_49000018	>jgi|Dappu1|238817|SNAP_00006875	jgi|Dappu1|245287|SNAP_00013345	>jgi|Dappu1|239125|SNAP_00007183	>jgi|Dappu1|318081|NCBI_GNO_2300119
>jgi|Dappu1|107337|fgenesh1_pg.C_scaffold_49000019	>jgi|Dappu1|238818|SNAP_00006876	jgi|Dappu1|104677|fgenesh1_pg.C_scaffold_31000140	>jgi|Dappu1|239138|SNAP_00007196	>jgi|Dappu1|318086|NCBI_GNO_2300124
>jgi|Dappu1|107339|fgenesh1_pg.C_scaffold_49000021	>jgi|Dappu1|222984|estExt_fgenesh1_pg.C_120239	jgi|Dappu1|319846|NCBI_GNO_3100143	>jgi|Dappu1|239176|SNAP_00007234	>jgi|Dappu1|303763|PASA_GEN_2300131
>jgi|Dappu1|107340|fgenesh1_pg.C_scaffold_49000022	>jgi|Dappu1|238824|SNAP_00006882	jgi|Dappu1|245291|SNAP_00013349	>jgi|Dappu1|239294|SNAP_00007352	>jgi|Dappu1|303769|PASA_GEN_2300138
>jgi|Dappu1|107344|fgenesh1_pg.C_scaffold_49000026	>jgi|Dappu1|314799|NCBI_GNO_1200224	jgi|Dappu1|245292|SNAP_00013350	>jgi|Dappu1|239326|SNAP_00007384	>jgi|Dappu1|318175|NCBI_GNO_2300213
>jgi|Dappu1|107345|fgenesh1_pg.C_scaffold_49000027	>jgi|Dappu1|238828|SNAP_00006886	jgi|Dappu1|319849|NCBI_GNO_3100146	>jgi|Dappu1|239327|SNAP_00007385	>jgi|Dappu1|320529|NCBI_GNO_3600007
>jgi|Dappu1|107356|fgenesh1_pg.C_scaffold_49000038	>jgi|Dappu1|238829|SNAP_00006887	jgi|Dappu1|319850|NCBI_GNO_3100147	>jgi|Dappu1|239330|SNAP_00007388	>jgi|Dappu1|105307|fgenesh1_pg.C_scaffold_36000008
>jgi|Dappu1|107357|fgenesh1_pg.C_scaffold_49000039	>jgi|Dappu1|314800|NCBI_GNO_1200225	jgi|Dappu1|245298|SNAP_00013356	>jgi|Dappu1|239346|SNAP_00007404	>jgi|Dappu1|320557|NCBI_GNO_3600035
>jgi|Dappu1|107358|fgenesh1_pg.C_scaffold_49000040	>jgi|Dappu1|238835|SNAP_00006893	jgi|Dappu1|319854|NCBI_GNO_3100151	>jgi|Dappu1|239370|SNAP_00007428	>jgi|Dappu1|246425|SNAP_00014483
>jgi|Dappu1|107359|fgenesh1_pg.C_scaffold_49000041	>jgi|Dappu1|314808|NCBI_GNO_1200233	jgi|Dappu1|245299|SNAP_00013357	>jgi|Dappu1|239397|SNAP_00007455	>jgi|Dappu1|105361|fgenesh1_pg.C_scaffold_36000062
>jgi|Dappu1|107361|fgenesh1_pg.C_scaffold_49000043	>jgi|Dappu1|238837|SNAP_00006895	jgi|Dappu1|104683|fgenesh1_pg.C_scaffold_31000146	>jgi|Dappu1|239404|SNAP_00007462	>jgi|Dappu1|246487|SNAP_00014545
>jgi|Dappu1|107362|fgenesh1_pg.C_scaffold_49000044	>jgi|Dappu1|238838|SNAP_00006896	jgi|Dappu1|104687|fgenesh1_pg.C_scaffold_31000150	>jgi|Dappu1|239558|SNAP_00007616	>jgi|Dappu1|92880|fgenesh1_kg.C_scaffold_36000002
>jgi|Dappu1|107382|fgenesh1_pg.C_scaffold_49000064	>jgi|Dappu1|314809|NCBI_GNO_1200234	jgi|Dappu1|319860|NCBI_GNO_3100157	>jgi|Dappu1|239595|SNAP_00007653	>jgi|Dappu1|246514|SNAP_00014572
>jgi|Dappu1|107391|fgenesh1_pg.C_scaffold_49000073	>jgi|Dappu1|238839|SNAP_00006897	jgi|Dappu1|319861|NCBI_GNO_3100158	>jgi|Dappu1|239600|SNAP_00007658	>jgi|Dappu1|246517|SNAP_00014575
>jgi|Dappu1|107406|fgenesh1_pg.C_scaffold_49000088	>jgi|Dappu1|314811|NCBI_GNO_1200236	jgi|Dappu1|99395|fgenesh1_pg.C_scaffold_12000004	>jgi|Dappu1|239739|SNAP_00007797	>jgi|Dappu1|320643|NCBI_GNO_3600121
>jgi|Dappu1|107409|fgenesh1_pg.C_scaffold_49000091	>jgi|Dappu1|238840|SNAP_00006898	jgi|Dappu1|99396|fgenesh1_pg.C_scaffold_12000005	>jgi|Dappu1|239741|SNAP_00007799	>jgi|Dappu1|225479|estExt_fgenesh1_pg.C_360130
>jgi|Dappu1|107410|fgenesh1_pg.C_scaffold_49000092	>jgi|Dappu1|314813|NCBI_GNO_1200238	jgi|Dappu1|314580|NCBI_GNO_1200004	>jgi|Dappu1|239749|SNAP_00007807	>jgi|Dappu1|320654|NCBI_GNO_3600132
>jgi|Dappu1|107423|fgenesh1_pg.C_scaffold_49000105	>jgi|Dappu1|99651|fgenesh1_pg.C_scaffold_12000260	jgi|Dappu1|314581|NCBI_GNO_1200005	>jgi|Dappu1|239768|SNAP_00007826	>jgi|Dappu1|246540|SNAP_00014598
>jgi|Dappu1|107425|fgenesh1_pg.C_scaffold_49000107	>jgi|Dappu1|314814|NCBI_GNO_1200239	jgi|Dappu1|99409|fgenesh1_pg.C_scaffold_12000018	>jgi|Dappu1|239781|SNAP_00007839	>jgi|Dappu1|225491|estExt_fgenesh1_pg.C_360161
>jgi|Dappu1|107426|fgenesh1_pg.C_scaffold_49000108	>jgi|Dappu1|314815|NCBI_GNO_1200240	jgi|Dappu1|238563|SNAP_00006621	>jgi|Dappu1|239782|SNAP_00007840	>jgi|Dappu1|305260|PASA_GEN_3600063
>jgi|Dappu1|107436|fgenesh1_pg.C_scaffold_49000118	>jgi|Dappu1|314816|NCBI_GNO_1200241	jgi|Dappu1|238566|SNAP_00006624	>jgi|Dappu1|239790|SNAP_00007848	>jgi|Dappu1|320754|NCBI_GNO_3600232
>jgi|Dappu1|107437|fgenesh1_pg.C_scaffold_50000001	>jgi|Dappu1|238845|SNAP_00006903	jgi|Dappu1|238567|SNAP_00006625	>jgi|Dappu1|239793|SNAP_00007851	>jgi|Dappu1|258018|SNAP_00026076
>jgi|Dappu1|107438|fgenesh1_pg.C_scaffold_50000002	>jgi|Dappu1|314818|NCBI_GNO_1200243	jgi|Dappu1|99414|fgenesh1_pg.C_scaffold_12000023	>jgi|Dappu1|239811|SNAP_00007869	>jgi|Dappu1|304056|PASA_GEN_2500085
>jgi|Dappu1|107439|fgenesh1_pg.C_scaffold_50000003	>jgi|Dappu1|99654|fgenesh1_pg.C_scaffold_12000263	jgi|Dappu1|238569|SNAP_00006627	>jgi|Dappu1|239875|SNAP_00007933	>jgi|Dappu1|304058|PASA_GEN_2500088
>jgi|Dappu1|107445|fgenesh1_pg.C_scaffold_50000009	>jgi|Dappu1|238849|SNAP_00006907	jgi|Dappu1|238570|SNAP_00006628	>jgi|Dappu1|239884|SNAP_00007942	>jgi|Dappu1|303985|PASA_GEN_2500001
>jgi|Dappu1|107453|fgenesh1_pg.C_scaffold_50000017	>jgi|Dappu1|238853|SNAP_00006911	jgi|Dappu1|238571|SNAP_00006629	>jgi|Dappu1|239885|SNAP_00007943	>jgi|Dappu1|304063|PASA_GEN_2500093
>jgi|Dappu1|107455|fgenesh1_pg.C_scaffold_50000019	>jgi|Dappu1|99661|fgenesh1_pg.C_scaffold_12000270	jgi|Dappu1|238573|SNAP_00006631	>jgi|Dappu1|239989|SNAP_00008047	>jgi|Dappu1|303988|PASA_GEN_2500004
>jgi|Dappu1|107456|fgenesh1_pg.C_scaffold_50000020	>jgi|Dappu1|314824|NCBI_GNO_1200249	jgi|Dappu1|238576|SNAP_00006634	>jgi|Dappu1|240014|SNAP_00008072	>jgi|Dappu1|318448|NCBI_GNO_2500027
>jgi|Dappu1|107459|fgenesh1_pg.C_scaffold_50000023	>jgi|Dappu1|314831|NCBI_GNO_1200256	jgi|Dappu1|238577|SNAP_00006635	>jgi|Dappu1|240144|SNAP_00008202	>jgi|Dappu1|103274|fgenesh1_pg.C_scaffold_25000031
>jgi|Dappu1|107470|fgenesh1_pg.C_scaffold_50000034	>jgi|Dappu1|238866|SNAP_00006924	jgi|Dappu1|238578|SNAP_00006636	>jgi|Dappu1|240157|SNAP_00008215	>jgi|Dappu1|211890|estExt_Genewise1.C_250047
>jgi|Dappu1|107474|fgenesh1_pg.C_scaffold_50000038	>jgi|Dappu1|238867|SNAP_00006925	jgi|Dappu1|238579|SNAP_00006637	>jgi|Dappu1|240263|SNAP_00008321	>jgi|Dappu1|103328|fgenesh1_pg.C_scaffold_25000085
>jgi|Dappu1|107476|fgenesh1_pg.C_scaffold_50000040	>jgi|Dappu1|238869|SNAP_00006927	jgi|Dappu1|238580|SNAP_00006638	>jgi|Dappu1|240264|SNAP_00008322	>jgi|Dappu1|318572|NCBI_GNO_2500152
>jgi|Dappu1|107478|fgenesh1_pg.C_scaffold_50000042	>jgi|Dappu1|238870|SNAP_00006928	jgi|Dappu1|238581|SNAP_00006639	>jgi|Dappu1|240438|SNAP_00008496	>jgi|Dappu1|318574|NCBI_GNO_2500154
>jgi|Dappu1|107480|fgenesh1_pg.C_scaffold_50000044	>jgi|Dappu1|238871|SNAP_00006929	jgi|Dappu1|238585|SNAP_00006643	>jgi|Dappu1|240534|SNAP_00008592	>jgi|Dappu1|318643|NCBI_GNO_2500224
>jgi|Dappu1|107482|fgenesh1_pg.C_scaffold_50000046	>jgi|Dappu1|314838|NCBI_GNO_1200263	jgi|Dappu1|99422|fgenesh1_pg.C_scaffold_12000031	>jgi|Dappu1|240555|SNAP_00008613	>jgi|Dappu1|224775|estExt_fgenesh1_pg.C_250281
>jgi|Dappu1|107486|fgenesh1_pg.C_scaffold_50000050	>jgi|Dappu1|238878|SNAP_00006936	jgi|Dappu1|238587|SNAP_00006645	>jgi|Dappu1|240559|SNAP_00008617	>jgi|Dappu1|115611|fgenesh1_pg.C_scaffold_161000013
>jgi|Dappu1|107491|fgenesh1_pg.C_scaffold_50000055	>jgi|Dappu1|238879|SNAP_00006937	jgi|Dappu1|238588|SNAP_00006646	>jgi|Dappu1|240561|SNAP_00008619	>jgi|Dappu1|115117|fgenesh1_pg.C_scaffold_145000061
>jgi|Dappu1|107493|fgenesh1_pg.C_scaffold_50000057	>jgi|Dappu1|238880|SNAP_00006938	jgi|Dappu1|314603|NCBI_GNO_1200027	>jgi|Dappu1|240619|SNAP_00008677	>jgi|Dappu1|115119|fgenesh1_pg.C_scaffold_145000063
>jgi|Dappu1|107500|fgenesh1_pg.C_scaffold_50000064	>jgi|Dappu1|314840|NCBI_GNO_1200265	jgi|Dappu1|222874|estExt_fgenesh1_pg.C_120031	>jgi|Dappu1|240627|SNAP_00008685	>jgi|Dappu1|301770|PASA_GEN_14500024
>jgi|Dappu1|107503|fgenesh1_pg.C_scaffold_50000067	>jgi|Dappu1|238882|SNAP_00006940	jgi|Dappu1|238593|SNAP_00006651	>jgi|Dappu1|240633|SNAP_00008691	>jgi|Dappu1|260993|SNAP_00029051
>jgi|Dappu1|107504|fgenesh1_pg.C_scaffold_50000068	>jgi|Dappu1|238883|SNAP_00006941	jgi|Dappu1|238594|SNAP_00006652	>jgi|Dappu1|240663|SNAP_00008721	>jgi|Dappu1|329313|NCBI_GNO_11800005
>jgi|Dappu1|107513|fgenesh1_pg.C_scaffold_50000077	>jgi|Dappu1|238888|SNAP_00006946	jgi|Dappu1|99428|fgenesh1_pg.C_scaffold_12000037	>jgi|Dappu1|240664|SNAP_00008722	>jgi|Dappu1|113840|fgenesh1_pg.C_scaffold_118000012
>jgi|Dappu1|107515|fgenesh1_pg.C_scaffold_50000079	>jgi|Dappu1|314845|NCBI_GNO_1200270	jgi|Dappu1|238599|SNAP_00006657	>jgi|Dappu1|240665|SNAP_00008723	>jgi|Dappu1|301024|PASA_GEN_11800018
>jgi|Dappu1|107523|fgenesh1_pg.C_scaffold_50000087	>jgi|Dappu1|314846|NCBI_GNO_1200271	jgi|Dappu1|99433|fgenesh1_pg.C_scaffold_12000042	>jgi|Dappu1|240674|SNAP_00008732	>jgi|Dappu1|329338|NCBI_GNO_11800030
>jgi|Dappu1|107524|fgenesh1_pg.C_scaffold_50000088	>jgi|Dappu1|314847|NCBI_GNO_1200272	jgi|Dappu1|99435|fgenesh1_pg.C_scaffold_12000044	>jgi|Dappu1|240676|SNAP_00008734	>jgi|Dappu1|228738|estExt_fgenesh1_pg.C_1180032
>jgi|Dappu1|107527|fgenesh1_pg.C_scaffold_50000091	>jgi|Dappu1|314849|NCBI_GNO_1200274	jgi|Dappu1|222879|estExt_fgenesh1_pg.C_120044	>jgi|Dappu1|240712|SNAP_00008770	>jgi|Dappu1|323426|NCBI_GNO_5400040
>jgi|Dappu1|107533|fgenesh1_pg.C_scaffold_50000097	>jgi|Dappu1|314850|NCBI_GNO_1200275	jgi|Dappu1|314619|NCBI_GNO_1200043	>jgi|Dappu1|240811|SNAP_00008869	>jgi|Dappu1|250592|SNAP_00018650
>jgi|Dappu1|107534|fgenesh1_pg.C_scaffold_50000098	>jgi|Dappu1|99686|fgenesh1_pg.C_scaffold_12000295	jgi|Dappu1|238610|SNAP_00006668	>jgi|Dappu1|240919|SNAP_00008977	>jgi|Dappu1|306850|PASA_GEN_5400034
>jgi|Dappu1|107536|fgenesh1_pg.C_scaffold_50000100	>jgi|Dappu1|238896|SNAP_00006954	jgi|Dappu1|222900|estExt_fgenesh1_pg.C_120065	>jgi|Dappu1|240982|SNAP_00009040	>jgi|Dappu1|323538|NCBI_GNO_5400152
>jgi|Dappu1|107537|fgenesh1_pg.C_scaffold_50000101	>jgi|Dappu1|99687|fgenesh1_pg.C_scaffold_12000296	jgi|Dappu1|238611|SNAP_00006669	>jgi|Dappu1|240999|SNAP_00009057	>jgi|Dappu1|323547|NCBI_GNO_5400161
>jgi|Dappu1|107539|fgenesh1_pg.C_scaffold_50000103	>jgi|Dappu1|238898|SNAP_00006956	jgi|Dappu1|238612|SNAP_00006670	>jgi|Dappu1|241065|SNAP_00009123	>jgi|Dappu1|323553|NCBI_GNO_5400167
>jgi|Dappu1|107542|fgenesh1_pg.C_scaffold_51000002	>jgi|Dappu1|238899|SNAP_00006957	jgi|Dappu1|314623|NCBI_GNO_1200047	>jgi|Dappu1|241084|SNAP_00009142	>jgi|Dappu1|255041|SNAP_00023099
>jgi|Dappu1|107544|fgenesh1_pg.C_scaffold_51000004	>jgi|Dappu1|238900|SNAP_00006958	jgi|Dappu1|314624|NCBI_GNO_1200048	>jgi|Dappu1|241176|SNAP_00009234	>jgi|Dappu1|111183|fgenesh1_pg.C_scaffold_82000015
>jgi|Dappu1|107568|fgenesh1_pg.C_scaffold_51000028	>jgi|Dappu1|314855|NCBI_GNO_1200280	jgi|Dappu1|238621|SNAP_00006679	>jgi|Dappu1|241186|SNAP_00009244	>jgi|Dappu1|17530|gw1.82.38.1
>jgi|Dappu1|107570|fgenesh1_pg.C_scaffold_51000030	>jgi|Dappu1|314856|NCBI_GNO_1200281	jgi|Dappu1|314627|NCBI_GNO_1200051	>jgi|Dappu1|241217|SNAP_00009275	>jgi|Dappu1|323681|NCBI_GNO_5500099
>jgi|Dappu1|107575|fgenesh1_pg.C_scaffold_51000035	>jgi|Dappu1|99691|fgenesh1_pg.C_scaffold_12000300	jgi|Dappu1|238628|SNAP_00006686	>jgi|Dappu1|241271|SNAP_00009329	>jgi|Dappu1|252028|SNAP_00020086
>jgi|Dappu1|107578|fgenesh1_pg.C_scaffold_51000038	>jgi|Dappu1|238904|SNAP_00006962	jgi|Dappu1|314638|NCBI_GNO_1200062	>jgi|Dappu1|241286|SNAP_00009344	>jgi|Dappu1|252029|SNAP_00020087
>jgi|Dappu1|107584|fgenesh1_pg.C_scaffold_51000044	>jgi|Dappu1|314859|NCBI_GNO_1200284	jgi|Dappu1|238637|SNAP_00006695	>jgi|Dappu1|241308|SNAP_00009366	>jgi|Dappu1|307389|PASA_GEN_6200081
>jgi|Dappu1|107585|fgenesh1_pg.C_scaffold_51000045	>jgi|Dappu1|238907|SNAP_00006965	jgi|Dappu1|238640|SNAP_00006698	>jgi|Dappu1|241413|SNAP_00009471	>jgi|Dappu1|109043|fgenesh1_pg.C_scaffold_62000059
>jgi|Dappu1|107594|fgenesh1_pg.C_scaffold_51000054	>jgi|Dappu1|314864|NCBI_GNO_1200289	jgi|Dappu1|314641|NCBI_GNO_1200065	>jgi|Dappu1|241436|SNAP_00009494	>jgi|Dappu1|252076|SNAP_00020134
>jgi|Dappu1|107612|fgenesh1_pg.C_scaffold_51000072	>jgi|Dappu1|99699|fgenesh1_pg.C_scaffold_12000308	jgi|Dappu1|314642|NCBI_GNO_1200066	>jgi|Dappu1|241481|SNAP_00009539	>jgi|Dappu1|324493|NCBI_GNO_6200068
>jgi|Dappu1|107622|fgenesh1_pg.C_scaffold_51000082	>jgi|Dappu1|314867|NCBI_GNO_1200292	jgi|Dappu1|238642|SNAP_00006700	>jgi|Dappu1|241495|SNAP_00009553	>jgi|Dappu1|252097|SNAP_00020155
>jgi|Dappu1|107624|fgenesh1_pg.C_scaffold_51000084	>jgi|Dappu1|314870|NCBI_GNO_1200295	jgi|Dappu1|99476|fgenesh1_pg.C_scaffold_12000085	>jgi|Dappu1|241507|SNAP_00009565	>jgi|Dappu1|324526|NCBI_GNO_6200101
>jgi|Dappu1|107626|fgenesh1_pg.C_scaffold_51000086	>jgi|Dappu1|314871|NCBI_GNO_1200296	jgi|Dappu1|238644|SNAP_00006702	>jgi|Dappu1|241513|SNAP_00009571	>jgi|Dappu1|307360|PASA_GEN_6200044
>jgi|Dappu1|107640|fgenesh1_pg.C_scaffold_51000100	>jgi|Dappu1|314872|NCBI_GNO_1200297	jgi|Dappu1|238645|SNAP_00006703	>jgi|Dappu1|241514|SNAP_00009572	>jgi|Dappu1|17331|gw1.113.49.1
>jgi|Dappu1|107642|fgenesh1_pg.C_scaffold_51000102	>jgi|Dappu1|99701|fgenesh1_pg.C_scaffold_12000310	jgi|Dappu1|238647|SNAP_00006705	>jgi|Dappu1|241559|SNAP_00009617	>jgi|Dappu1|258493|SNAP_00026551
>jgi|Dappu1|107647|fgenesh1_pg.C_scaffold_51000107	>jgi|Dappu1|238920|SNAP_00006978	jgi|Dappu1|314646|NCBI_GNO_1200070	>jgi|Dappu1|241744|SNAP_00009802	>jgi|Dappu1|254259|SNAP_00022317
>jgi|Dappu1|107649|fgenesh1_pg.C_scaffold_51000109	>jgi|Dappu1|238921|SNAP_00006979	jgi|Dappu1|238650|SNAP_00006708	>jgi|Dappu1|241840|SNAP_00009898	>jgi|Dappu1|254308|SNAP_00022366
>jgi|Dappu1|107650|fgenesh1_pg.C_scaffold_51000110	>jgi|Dappu1|238922|SNAP_00006980	jgi|Dappu1|238652|SNAP_00006710	>jgi|Dappu1|241864|SNAP_00009922	>jgi|Dappu1|308183|PASA_GEN_7600027
>jgi|Dappu1|107654|fgenesh1_pg.C_scaffold_51000114	>jgi|Dappu1|99703|fgenesh1_pg.C_scaffold_12000312	jgi|Dappu1|314649|NCBI_GNO_1200073	>jgi|Dappu1|241871|SNAP_00009929	>jgi|Dappu1|231437|estExt_fgenesh1_kg.C_760024
>jgi|Dappu1|107682|fgenesh1_pg.C_scaffold_51000142	>jgi|Dappu1|314876|NCBI_GNO_1200301	jgi|Dappu1|238653|SNAP_00006711	>jgi|Dappu1|242233|SNAP_00010291	>jgi|Dappu1|37805|gw1.18.366.1
>jgi|Dappu1|107684|fgenesh1_pg.C_scaffold_51000144	>jgi|Dappu1|238924|SNAP_00006982	jgi|Dappu1|314651|NCBI_GNO_1200075	>jgi|Dappu1|242259|SNAP_00010317	>jgi|Dappu1|316590|NCBI_GNO_1800009
>jgi|Dappu1|107700|fgenesh1_pg.C_scaffold_52000011	>jgi|Dappu1|238925|SNAP_00006983	jgi|Dappu1|238655|SNAP_00006713	>jgi|Dappu1|242269|SNAP_00010327	>jgi|Dappu1|101466|fgenesh1_pg.C_scaffold_18000030
>jgi|Dappu1|107719|fgenesh1_pg.C_scaffold_52000030	>jgi|Dappu1|314878|NCBI_GNO_1200303	jgi|Dappu1|314654|NCBI_GNO_1200078	>jgi|Dappu1|242431|SNAP_00010489	>jgi|Dappu1|101475|fgenesh1_pg.C_scaffold_18000039
>jgi|Dappu1|107733|fgenesh1_pg.C_scaffold_52000044	>jgi|Dappu1|314879|NCBI_GNO_1200304	jgi|Dappu1|314655|NCBI_GNO_1200079	>jgi|Dappu1|242554|SNAP_00010612	>jgi|Dappu1|241140|SNAP_00009198
>jgi|Dappu1|107734|fgenesh1_pg.C_scaffold_52000045	>jgi|Dappu1|314880|NCBI_GNO_1200305	jgi|Dappu1|314656|NCBI_GNO_1200080	>jgi|Dappu1|242585|SNAP_00010643	>jgi|Dappu1|241142|SNAP_00009200
>jgi|Dappu1|107735|fgenesh1_pg.C_scaffold_52000046	>jgi|Dappu1|314881|NCBI_GNO_1200306	jgi|Dappu1|238657|SNAP_00006715	>jgi|Dappu1|242638|SNAP_00010696	>jgi|Dappu1|302514|PASA_GEN_1800012
>jgi|Dappu1|107737|fgenesh1_pg.C_scaffold_52000048	>jgi|Dappu1|99705|fgenesh1_pg.C_scaffold_12000314	jgi|Dappu1|314659|NCBI_GNO_1200083	>jgi|Dappu1|242682|SNAP_00010740	>jgi|Dappu1|8488|gw1.18.89.1
>jgi|Dappu1|107738|fgenesh1_pg.C_scaffold_52000049	>jgi|Dappu1|238928|SNAP_00006986	jgi|Dappu1|314660|NCBI_GNO_1200084	>jgi|Dappu1|242755|SNAP_00010813	>jgi|Dappu1|316665|NCBI_GNO_1800085
>jgi|Dappu1|107739|fgenesh1_pg.C_scaffold_52000050	>jgi|Dappu1|238929|SNAP_00006987	jgi|Dappu1|314661|NCBI_GNO_1200085	>jgi|Dappu1|242882|SNAP_00010940	>jgi|Dappu1|241185|SNAP_00009243
>jgi|Dappu1|107740|fgenesh1_pg.C_scaffold_52000051	>jgi|Dappu1|238930|SNAP_00006988	jgi|Dappu1|238660|SNAP_00006718	>jgi|Dappu1|242905|SNAP_00010963	>jgi|Dappu1|302531|PASA_GEN_1800032
>jgi|Dappu1|107741|fgenesh1_pg.C_scaffold_52000052	>jgi|Dappu1|238931|SNAP_00006989	jgi|Dappu1|222913|estExt_fgenesh1_pg.C_120095	>jgi|Dappu1|242922|SNAP_00010980	>jgi|Dappu1|31913|gw1.18.281.1
>jgi|Dappu1|107745|fgenesh1_pg.C_scaffold_52000056	>jgi|Dappu1|238932|SNAP_00006990	jgi|Dappu1|238663|SNAP_00006721	>jgi|Dappu1|243335|SNAP_00011393	>jgi|Dappu1|316719|NCBI_GNO_1800139
>jgi|Dappu1|107746|fgenesh1_pg.C_scaffold_52000057	>jgi|Dappu1|314885|NCBI_GNO_1200310	jgi|Dappu1|314670|NCBI_GNO_1200094	>jgi|Dappu1|243363|SNAP_00011421	>jgi|Dappu1|101570|fgenesh1_pg.C_scaffold_18000134
>jgi|Dappu1|107750|fgenesh1_pg.C_scaffold_52000061	>jgi|Dappu1|314894|NCBI_GNO_1200319	jgi|Dappu1|99493|fgenesh1_pg.C_scaffold_12000102	>jgi|Dappu1|243524|SNAP_00011582	>jgi|Dappu1|302539|PASA_GEN_1800041
>jgi|Dappu1|107751|fgenesh1_pg.C_scaffold_52000062	>jgi|Dappu1|314895|NCBI_GNO_1200320	jgi|Dappu1|99497|fgenesh1_pg.C_scaffold_12000106	>jgi|Dappu1|243569|SNAP_00011627	>jgi|Dappu1|316731|NCBI_GNO_1800151
>jgi|Dappu1|107753|fgenesh1_pg.C_scaffold_52000064	>jgi|Dappu1|314896|NCBI_GNO_1200321	jgi|Dappu1|314679|NCBI_GNO_1200103	>jgi|Dappu1|243679|SNAP_00011737	>jgi|Dappu1|316732|NCBI_GNO_1800152
>jgi|Dappu1|107757|fgenesh1_pg.C_scaffold_52000068	>jgi|Dappu1|314898|NCBI_GNO_1200323	jgi|Dappu1|314682|NCBI_GNO_1200106	>jgi|Dappu1|243781|SNAP_00011839	>jgi|Dappu1|302541|PASA_GEN_1800043
>jgi|Dappu1|107760|fgenesh1_pg.C_scaffold_52000071	>jgi|Dappu1|238945|SNAP_00007003	jgi|Dappu1|314685|NCBI_GNO_1200109	>jgi|Dappu1|243900|SNAP_00011958	>jgi|Dappu1|223830|estExt_fgenesh1_pg.C_180151
>jgi|Dappu1|107766|fgenesh1_pg.C_scaffold_52000077	>jgi|Dappu1|238946|SNAP_00007004	jgi|Dappu1|99502|fgenesh1_pg.C_scaffold_12000111	>jgi|Dappu1|243954|SNAP_00012012	>jgi|Dappu1|35046|gw1.18.323.1
>jgi|Dappu1|107780|fgenesh1_pg.C_scaffold_52000091	>jgi|Dappu1|314900|NCBI_GNO_1200325	jgi|Dappu1|28128|gw1.12.389.1	>jgi|Dappu1|243988|SNAP_00012046	>jgi|Dappu1|241319|SNAP_00009377
>jgi|Dappu1|107783|fgenesh1_pg.C_scaffold_52000094	>jgi|Dappu1|223019|estExt_fgenesh1_pg.C_120329	jgi|Dappu1|314696|NCBI_GNO_1200120	>jgi|Dappu1|244003|SNAP_00012061	>jgi|Dappu1|101616|fgenesh1_pg.C_scaffold_18000180
>jgi|Dappu1|107784|fgenesh1_pg.C_scaffold_52000095	>jgi|Dappu1|314905|NCBI_GNO_1200330	jgi|Dappu1|314698|NCBI_GNO_1200122	>jgi|Dappu1|244017|SNAP_00012075	>jgi|Dappu1|101617|fgenesh1_pg.C_scaffold_18000181
>jgi|Dappu1|107786|fgenesh1_pg.C_scaffold_52000097	>jgi|Dappu1|314906|NCBI_GNO_1200331	jgi|Dappu1|314699|NCBI_GNO_1200123	>jgi|Dappu1|244197|SNAP_00012255	>jgi|Dappu1|49104|e_gw1.18.316.1
>jgi|Dappu1|107797|fgenesh1_pg.C_scaffold_52000108	>jgi|Dappu1|99723|fgenesh1_pg.C_scaffold_12000332	jgi|Dappu1|238704|SNAP_00006762	>jgi|Dappu1|2442|gw1.164.3.1	>jgi|Dappu1|3193|gw1.18.19.1
>jgi|Dappu1|107813|fgenesh1_pg.C_scaffold_52000124	>jgi|Dappu1|238974|SNAP_00007032	jgi|Dappu1|238705|SNAP_00006763	>jgi|Dappu1|244229|SNAP_00012287	>jgi|Dappu1|241326|SNAP_00009384
>jgi|Dappu1|107815|fgenesh1_pg.C_scaffold_52000126	>jgi|Dappu1|314915|NCBI_GNO_1200340	jgi|Dappu1|99521|fgenesh1_pg.C_scaffold_12000130	>jgi|Dappu1|244259|SNAP_00012317	>jgi|Dappu1|241333|SNAP_00009391
>jgi|Dappu1|107817|fgenesh1_pg.C_scaffold_52000128	>jgi|Dappu1|238980|SNAP_00007038	jgi|Dappu1|314708|NCBI_GNO_1200132	>jgi|Dappu1|244336|SNAP_00012394	>jgi|Dappu1|302550|PASA_GEN_1800052
>jgi|Dappu1|107820|fgenesh1_pg.C_scaffold_52000131	>jgi|Dappu1|314917|NCBI_GNO_1200342	jgi|Dappu1|238711|SNAP_00006769	>jgi|Dappu1|244347|SNAP_00012405	>jgi|Dappu1|316799|NCBI_GNO_1800219
>jgi|Dappu1|107848|fgenesh1_pg.C_scaffold_53000021	>jgi|Dappu1|314918|NCBI_GNO_1200343	jgi|Dappu1|99525|fgenesh1_pg.C_scaffold_12000134	>jgi|Dappu1|244357|SNAP_00012415	>jgi|Dappu1|316815|NCBI_GNO_1800235
>jgi|Dappu1|107850|fgenesh1_pg.C_scaffold_53000023	>jgi|Dappu1|238989|SNAP_00007047	jgi|Dappu1|99526|fgenesh1_pg.C_scaffold_12000135	>jgi|Dappu1|244450|SNAP_00012508	>jgi|Dappu1|302553|PASA_GEN_1800055
>jgi|Dappu1|107853|fgenesh1_pg.C_scaffold_53000026	>jgi|Dappu1|238991|SNAP_00007049	jgi|Dappu1|99527|fgenesh1_pg.C_scaffold_12000136	>jgi|Dappu1|244452|SNAP_00012510	>jgi|Dappu1|302555|PASA_GEN_1800057
>jgi|Dappu1|107854|fgenesh1_pg.C_scaffold_53000027	>jgi|Dappu1|314923|NCBI_GNO_1200348	jgi|Dappu1|99528|fgenesh1_pg.C_scaffold_12000137	>jgi|Dappu1|244658|SNAP_00012716	>jgi|Dappu1|223872|estExt_fgenesh1_pg.C_180266
>jgi|Dappu1|107860|fgenesh1_pg.C_scaffold_53000033	>jgi|Dappu1|314924|NCBI_GNO_1200349	jgi|Dappu1|238714|SNAP_00006772	>jgi|Dappu1|244669|SNAP_00012727	>jgi|Dappu1|101703|fgenesh1_pg.C_scaffold_18000267
>jgi|Dappu1|107910|fgenesh1_pg.C_scaffold_53000083	>jgi|Dappu1|314926|NCBI_GNO_1200351	jgi|Dappu1|238715|SNAP_00006773	>jgi|Dappu1|244672|SNAP_00012730	>jgi|Dappu1|241519|SNAP_00009577
>jgi|Dappu1|107925|fgenesh1_pg.C_scaffold_53000098	>jgi|Dappu1|314927|NCBI_GNO_1200352	jgi|Dappu1|238716|SNAP_00006774	>jgi|Dappu1|244675|SNAP_00012733	>jgi|Dappu1|317000|NCBI_GNO_1800420
>jgi|Dappu1|107952|fgenesh1_pg.C_scaffold_53000125	>jgi|Dappu1|314929|NCBI_GNO_1200354	jgi|Dappu1|194402|estExt_Genewise1Plus.C_120201	>jgi|Dappu1|244676|SNAP_00012734	>jgi|Dappu1|243777|SNAP_00011835
>jgi|Dappu1|107964|fgenesh1_pg.C_scaffold_53000137	>jgi|Dappu1|314931|NCBI_GNO_1200356	jgi|Dappu1|238722|SNAP_00006780	>jgi|Dappu1|244685|SNAP_00012743	>jgi|Dappu1|304171|PASA_GEN_2600002
>jgi|Dappu1|107970|fgenesh1_pg.C_scaffold_53000143	>jgi|Dappu1|239001|SNAP_00007059	jgi|Dappu1|314719|NCBI_GNO_1200143	>jgi|Dappu1|244718|SNAP_00012776	>jgi|Dappu1|318746|NCBI_GNO_2600048
>jgi|Dappu1|107977|fgenesh1_pg.C_scaffold_54000001	>jgi|Dappu1|239002|SNAP_00007060	jgi|Dappu1|314727|NCBI_GNO_1200151	>jgi|Dappu1|244719|SNAP_00012777	>jgi|Dappu1|243830|SNAP_00011888
>jgi|Dappu1|107979|fgenesh1_pg.C_scaffold_54000003	>jgi|Dappu1|239007|SNAP_00007065	jgi|Dappu1|238735|SNAP_00006793	>jgi|Dappu1|244720|SNAP_00012778	>jgi|Dappu1|318817|NCBI_GNO_2600120
>jgi|Dappu1|107984|fgenesh1_pg.C_scaffold_54000008	>jgi|Dappu1|239008|SNAP_00007066	jgi|Dappu1|314729|NCBI_GNO_1200153	>jgi|Dappu1|244721|SNAP_00012779	>jgi|Dappu1|197063|estExt_Genewise1Plus.C_260085
>jgi|Dappu1|107986|fgenesh1_pg.C_scaffold_54000010	>jgi|Dappu1|239010|SNAP_00007068	jgi|Dappu1|99561|fgenesh1_pg.C_scaffold_12000170	>jgi|Dappu1|244722|SNAP_00012780	>jgi|Dappu1|318843|NCBI_GNO_2600146
>jgi|Dappu1|107987|fgenesh1_pg.C_scaffold_54000011	>jgi|Dappu1|99745|fgenesh1_pg.C_scaffold_12000354	jgi|Dappu1|99563|fgenesh1_pg.C_scaffold_12000172	>jgi|Dappu1|244784|SNAP_00012842	>jgi|Dappu1|318888|NCBI_GNO_2600192
>jgi|Dappu1|107990|fgenesh1_pg.C_scaffold_54000014	>jgi|Dappu1|239015|SNAP_00007073	jgi|Dappu1|238745|SNAP_00006803	>jgi|Dappu1|244816|SNAP_00012874	>jgi|Dappu1|318914|NCBI_GNO_2600218
>jgi|Dappu1|107992|fgenesh1_pg.C_scaffold_54000016	>jgi|Dappu1|99747|fgenesh1_pg.C_scaffold_12000356	jgi|Dappu1|238746|SNAP_00006804	>jgi|Dappu1|244823|SNAP_00012881	>jgi|Dappu1|99793|fgenesh1_pg.C_scaffold_13000046
>jgi|Dappu1|107993|fgenesh1_pg.C_scaffold_54000017	>jgi|Dappu1|236607|SNAP_00004665	jgi|Dappu1|238750|SNAP_00006808	>jgi|Dappu1|244863|SNAP_00012921	>jgi|Dappu1|314991|NCBI_GNO_1300052
>jgi|Dappu1|107999|fgenesh1_pg.C_scaffold_54000023	>jgi|Dappu1|222058|estExt_fgenesh1_pg.C_80011	jgi|Dappu1|238751|SNAP_00006809	>jgi|Dappu1|244905|SNAP_00012963	>jgi|Dappu1|314992|NCBI_GNO_1300053
>jgi|Dappu1|108003|fgenesh1_pg.C_scaffold_54000027	>jgi|Dappu1|236619|SNAP_00004677	jgi|Dappu1|238752|SNAP_00006810	>jgi|Dappu1|244957|SNAP_00013015	>jgi|Dappu1|239124|SNAP_00007182
>jgi|Dappu1|108005|fgenesh1_pg.C_scaffold_54000029	>jgi|Dappu1|236622|SNAP_00004680	jgi|Dappu1|238755|SNAP_00006813	>jgi|Dappu1|245082|SNAP_00013140	>jgi|Dappu1|47334|e_gw1.13.489.1
>jgi|Dappu1|108011|fgenesh1_pg.C_scaffold_54000035	>jgi|Dappu1|236623|SNAP_00004681	jgi|Dappu1|238758|SNAP_00006816	>jgi|Dappu1|245089|SNAP_00013147	>jgi|Dappu1|223050|estExt_fgenesh1_pg.C_130088
>jgi|Dappu1|108016|fgenesh1_pg.C_scaffold_54000040	>jgi|Dappu1|97834|fgenesh1_pg.C_scaffold_8000014	jgi|Dappu1|238759|SNAP_00006817	>jgi|Dappu1|245123|SNAP_00013181	>jgi|Dappu1|239152|SNAP_00007210
>jgi|Dappu1|108027|fgenesh1_pg.C_scaffold_54000051	>jgi|Dappu1|236626|SNAP_00004684	jgi|Dappu1|99571|fgenesh1_pg.C_scaffold_12000180	>jgi|Dappu1|245195|SNAP_00013253	>jgi|Dappu1|315032|NCBI_GNO_1300093
>jgi|Dappu1|108032|fgenesh1_pg.C_scaffold_54000056	>jgi|Dappu1|236631|SNAP_00004689	jgi|Dappu1|99576|fgenesh1_pg.C_scaffold_12000185	>jgi|Dappu1|24528|gw1.12.311.1	>jgi|Dappu1|315037|NCBI_GNO_1300098
>jgi|Dappu1|108033|fgenesh1_pg.C_scaffold_54000057	>jgi|Dappu1|222061|estExt_fgenesh1_pg.C_80017	jgi|Dappu1|99579|fgenesh1_pg.C_scaffold_12000188	>jgi|Dappu1|245299|SNAP_00013357	>jgi|Dappu1|223065|estExt_fgenesh1_pg.C_130109
>jgi|Dappu1|108034|fgenesh1_pg.C_scaffold_54000058	>jgi|Dappu1|222068|estExt_fgenesh1_pg.C_80025	jgi|Dappu1|222961|estExt_fgenesh1_pg.C_120188	>jgi|Dappu1|24548|gw1.70.134.1	>jgi|Dappu1|239170|SNAP_00007228
>jgi|Dappu1|108035|fgenesh1_pg.C_scaffold_54000059	>jgi|Dappu1|313077|NCBI_GNO_0800025	jgi|Dappu1|222963|estExt_fgenesh1_pg.C_120190	>jgi|Dappu1|24550|gw1.13.292.1	>jgi|Dappu1|315096|NCBI_GNO_1300158
>jgi|Dappu1|108038|fgenesh1_pg.C_scaffold_54000062	>jgi|Dappu1|313078|NCBI_GNO_0800026	jgi|Dappu1|99586|fgenesh1_pg.C_scaffold_12000195	>jgi|Dappu1|245525|SNAP_00013583	>jgi|Dappu1|223102|estExt_fgenesh1_pg.C_130173
>jgi|Dappu1|108041|fgenesh1_pg.C_scaffold_54000065	>jgi|Dappu1|236645|SNAP_00004703	jgi|Dappu1|314756|NCBI_GNO_1200180	>jgi|Dappu1|245526|SNAP_00013584	>jgi|Dappu1|99923|fgenesh1_pg.C_scaffold_13000176
>jgi|Dappu1|108042|fgenesh1_pg.C_scaffold_54000066	>jgi|Dappu1|222074|estExt_fgenesh1_pg.C_80033	jgi|Dappu1|238775|SNAP_00006833	>jgi|Dappu1|245527|SNAP_00013585	>jgi|Dappu1|223127|estExt_fgenesh1_pg.C_130214
>jgi|Dappu1|108056|fgenesh1_pg.C_scaffold_54000080	>jgi|Dappu1|230477|estExt_fgenesh1_kg.C_80003	jgi|Dappu1|238776|SNAP_00006834	>jgi|Dappu1|245544|SNAP_00013602	>jgi|Dappu1|99969|fgenesh1_pg.C_scaffold_13000222
>jgi|Dappu1|108058|fgenesh1_pg.C_scaffold_54000082	>jgi|Dappu1|222080|estExt_fgenesh1_pg.C_80039	jgi|Dappu1|238777|SNAP_00006835	>jgi|Dappu1|245579|SNAP_00013637	>jgi|Dappu1|315148|NCBI_GNO_1300210
>jgi|Dappu1|108067|fgenesh1_pg.C_scaffold_54000091	>jgi|Dappu1|222083|estExt_fgenesh1_pg.C_80042	jgi|Dappu1|230613|estExt_fgenesh1_kg.C_120027	>jgi|Dappu1|245609|SNAP_00013667	>jgi|Dappu1|315172|NCBI_GNO_1300234
>jgi|Dappu1|108078|fgenesh1_pg.C_scaffold_54000102	>jgi|Dappu1|236651|SNAP_00004709	jgi|Dappu1|222971|estExt_fgenesh1_pg.C_120200	>jgi|Dappu1|245621|SNAP_00013679	>jgi|Dappu1|315194|NCBI_GNO_1300256
>jgi|Dappu1|108083|fgenesh1_pg.C_scaffold_54000107	>jgi|Dappu1|222086|estExt_fgenesh1_pg.C_80045	jgi|Dappu1|301127|PASA_GEN_1200058	>jgi|Dappu1|245735|SNAP_00013793	>jgi|Dappu1|223163|estExt_fgenesh1_pg.C_130284
>jgi|Dappu1|108089|fgenesh1_pg.C_scaffold_54000113	>jgi|Dappu1|236661|SNAP_00004719	jgi|Dappu1|314769|NCBI_GNO_1200194	>jgi|Dappu1|245756|SNAP_00013814	>jgi|Dappu1|100036|fgenesh1_pg.C_scaffold_13000289
>jgi|Dappu1|108091|fgenesh1_pg.C_scaffold_54000115	>jgi|Dappu1|97873|fgenesh1_pg.C_scaffold_8000053	jgi|Dappu1|99605|fgenesh1_pg.C_scaffold_12000214	>jgi|Dappu1|245839|SNAP_00013897	>jgi|Dappu1|100044|fgenesh1_pg.C_scaffold_13000297
>jgi|Dappu1|108114|fgenesh1_pg.C_scaffold_55000001	>jgi|Dappu1|97874|fgenesh1_pg.C_scaffold_8000054	jgi|Dappu1|99606|fgenesh1_pg.C_scaffold_12000215	>jgi|Dappu1|245861|SNAP_00013919	>jgi|Dappu1|315239|NCBI_GNO_1300302
>jgi|Dappu1|108116|fgenesh1_pg.C_scaffold_55000003	>jgi|Dappu1|236667|SNAP_00004725	jgi|Dappu1|99611|fgenesh1_pg.C_scaffold_12000220	>jgi|Dappu1|245878|SNAP_00013936	>jgi|Dappu1|315247|NCBI_GNO_1300310
>jgi|Dappu1|108123|fgenesh1_pg.C_scaffold_55000010	>jgi|Dappu1|222094|estExt_fgenesh1_pg.C_80060	jgi|Dappu1|99612|fgenesh1_pg.C_scaffold_12000221	>jgi|Dappu1|245881|SNAP_00013939	>jgi|Dappu1|47392|e_gw1.13.450.1
>jgi|Dappu1|108125|fgenesh1_pg.C_scaffold_55000012	>jgi|Dappu1|313103|NCBI_GNO_0800051	jgi|Dappu1|99614|fgenesh1_pg.C_scaffold_12000223	>jgi|Dappu1|245908|SNAP_00013966	>jgi|Dappu1|110891|fgenesh1_pg.C_scaffold_79000004
>jgi|Dappu1|108126|fgenesh1_pg.C_scaffold_55000013	>jgi|Dappu1|313104|NCBI_GNO_0800052	jgi|Dappu1|99617|fgenesh1_pg.C_scaffold_12000226	>jgi|Dappu1|245913|SNAP_00013971	>jgi|Dappu1|227578|estExt_fgenesh1_pg.C_790022
>jgi|Dappu1|108140|fgenesh1_pg.C_scaffold_55000027	>jgi|Dappu1|313105|NCBI_GNO_0800053	jgi|Dappu1|238799|SNAP_00006857	>jgi|Dappu1|245919|SNAP_00013977	>jgi|Dappu1|326379|NCBI_GNO_7900033
>jgi|Dappu1|108147|fgenesh1_pg.C_scaffold_55000034	>jgi|Dappu1|97889|fgenesh1_pg.C_scaffold_8000069	jgi|Dappu1|238800|SNAP_00006858	>jgi|Dappu1|245957|SNAP_00014015	>jgi|Dappu1|326381|NCBI_GNO_7900035
>jgi|Dappu1|108150|fgenesh1_pg.C_scaffold_55000037	>jgi|Dappu1|313115|NCBI_GNO_0800063	jgi|Dappu1|314776|NCBI_GNO_1200201	>jgi|Dappu1|246005|SNAP_00014063	>jgi|Dappu1|110922|fgenesh1_pg.C_scaffold_79000035
>jgi|Dappu1|108154|fgenesh1_pg.C_scaffold_55000041	>jgi|Dappu1|313117|NCBI_GNO_0800065	jgi|Dappu1|99620|fgenesh1_pg.C_scaffold_12000229	>jgi|Dappu1|246191|SNAP_00014249	>jgi|Dappu1|216176|estExt_Genewise1.C_790047
>jgi|Dappu1|108155|fgenesh1_pg.C_scaffold_55000042	>jgi|Dappu1|222112|estExt_fgenesh1_pg.C_80084	jgi|Dappu1|314778|NCBI_GNO_1200203	>jgi|Dappu1|246212|SNAP_00014270	>jgi|Dappu1|227604|estExt_fgenesh1_pg.C_790073
>jgi|Dappu1|108156|fgenesh1_pg.C_scaffold_55000043	>jgi|Dappu1|236688|SNAP_00004746	jgi|Dappu1|238803|SNAP_00006861	>jgi|Dappu1|24623|gw1.7.338.1	>jgi|Dappu1|227614|estExt_fgenesh1_pg.C_790096
>jgi|Dappu1|108158|fgenesh1_pg.C_scaffold_55000045	>jgi|Dappu1|97909|fgenesh1_pg.C_scaffold_8000089	jgi|Dappu1|238804|SNAP_00006862	>jgi|Dappu1|246337|SNAP_00014395	>jgi|Dappu1|254743|SNAP_00022801
>jgi|Dappu1|108161|fgenesh1_pg.C_scaffold_55000048	>jgi|Dappu1|313127|NCBI_GNO_0800075	jgi|Dappu1|314780|NCBI_GNO_1200205	>jgi|Dappu1|246339|SNAP_00014397	>jgi|Dappu1|326454|NCBI_GNO_7900108
>jgi|Dappu1|108167|fgenesh1_pg.C_scaffold_55000054	>jgi|Dappu1|97917|fgenesh1_pg.C_scaffold_8000097	jgi|Dappu1|314782|NCBI_GNO_1200207	>jgi|Dappu1|246341|SNAP_00014399	>jgi|Dappu1|326462|NCBI_GNO_7900116
>jgi|Dappu1|108171|fgenesh1_pg.C_scaffold_55000058	>jgi|Dappu1|313131|NCBI_GNO_0800079	jgi|Dappu1|238807|SNAP_00006865	>jgi|Dappu1|246379|SNAP_00014437	>jgi|Dappu1|300531|PASA_GEN_10100001
>jgi|Dappu1|108173|fgenesh1_pg.C_scaffold_55000060	>jgi|Dappu1|236703|SNAP_00004761	jgi|Dappu1|238808|SNAP_00006866	>jgi|Dappu1|246402|SNAP_00014460	>jgi|Dappu1|112900|fgenesh1_pg.C_scaffold_101000040
>jgi|Dappu1|108175|fgenesh1_pg.C_scaffold_55000062	>jgi|Dappu1|236707|SNAP_00004765	jgi|Dappu1|314784|NCBI_GNO_1200209	>jgi|Dappu1|246407|SNAP_00014465	>jgi|Dappu1|117593|fgenesh1_pg.C_scaffold_245000006
>jgi|Dappu1|108182|fgenesh1_pg.C_scaffold_55000069	>jgi|Dappu1|97923|fgenesh1_pg.C_scaffold_8000103	jgi|Dappu1|99625|fgenesh1_pg.C_scaffold_12000234	>jgi|Dappu1|246418|SNAP_00014476	>jgi|Dappu1|333581|NCBI_GNO_24500014
>jgi|Dappu1|108184|fgenesh1_pg.C_scaffold_55000071	>jgi|Dappu1|236711|SNAP_00004769	jgi|Dappu1|238810|SNAP_00006868	>jgi|Dappu1|246431|SNAP_00014489	>jgi|Dappu1|303971|PASA_GEN_24500006
>jgi|Dappu1|108198|fgenesh1_pg.C_scaffold_55000085	>jgi|Dappu1|313135|NCBI_GNO_0800084	jgi|Dappu1|238811|SNAP_00006869	>jgi|Dappu1|246435|SNAP_00014493	>jgi|Dappu1|65748|e_gw1.245.37.1
>jgi|Dappu1|108199|fgenesh1_pg.C_scaffold_55000086	>jgi|Dappu1|97932|fgenesh1_pg.C_scaffold_8000112	jgi|Dappu1|238812|SNAP_00006870	>jgi|Dappu1|246444|SNAP_00014502	>jgi|Dappu1|231870|estExt_fgenesh1_kg.C_2450001
>jgi|Dappu1|108200|fgenesh1_pg.C_scaffold_55000087	>jgi|Dappu1|236728|SNAP_00004786	jgi|Dappu1|99627|fgenesh1_pg.C_scaffold_12000236	>jgi|Dappu1|246486|SNAP_00014544	>jgi|Dappu1|334148|NCBI_GNO_30700004
>jgi|Dappu1|108209|fgenesh1_pg.C_scaffold_55000096	>jgi|Dappu1|236729|SNAP_00004787	jgi|Dappu1|238815|SNAP_00006873	>jgi|Dappu1|246507|SNAP_00014565	>jgi|Dappu1|264319|SNAP_00032377
>jgi|Dappu1|108211|fgenesh1_pg.C_scaffold_55000098	>jgi|Dappu1|308446|PASA_GEN_0800096	jgi|Dappu1|238816|SNAP_00006874	>jgi|Dappu1|246512|SNAP_00014570	>jgi|Dappu1|303558|PASA_GEN_21300013
>jgi|Dappu1|108212|fgenesh1_pg.C_scaffold_55000099	>jgi|Dappu1|308447|PASA_GEN_0800097	jgi|Dappu1|238817|SNAP_00006875	>jgi|Dappu1|246526|SNAP_00014584	>jgi|Dappu1|117072|fgenesh1_pg.C_scaffold_213000034
>jgi|Dappu1|108213|fgenesh1_pg.C_scaffold_55000100	>jgi|Dappu1|236733|SNAP_00004791	jgi|Dappu1|238818|SNAP_00006876	>jgi|Dappu1|246527|SNAP_00014585	>jgi|Dappu1|117073|fgenesh1_pg.C_scaffold_213000035
>jgi|Dappu1|108214|fgenesh1_pg.C_scaffold_55000101	>jgi|Dappu1|236741|SNAP_00004799	jgi|Dappu1|222984|estExt_fgenesh1_pg.C_120239	>jgi|Dappu1|246537|SNAP_00014595	>jgi|Dappu1|309243|PASA_GEN_9300001
>jgi|Dappu1|108228|fgenesh1_pg.C_scaffold_56000004	>jgi|Dappu1|236742|SNAP_00004800	jgi|Dappu1|238824|SNAP_00006882	>jgi|Dappu1|246614|SNAP_00014672	>jgi|Dappu1|228129|estExt_fgenesh1_pg.C_930025
>jgi|Dappu1|108237|fgenesh1_pg.C_scaffold_56000013	>jgi|Dappu1|236750|SNAP_00004808	jgi|Dappu1|314799|NCBI_GNO_1200224	>jgi|Dappu1|246660|SNAP_00014718	>jgi|Dappu1|327666|NCBI_GNO_9300052
>jgi|Dappu1|108253|fgenesh1_pg.C_scaffold_56000029	>jgi|Dappu1|236751|SNAP_00004809	jgi|Dappu1|238828|SNAP_00006886	>jgi|Dappu1|246665|SNAP_00014723	>jgi|Dappu1|303532|PASA_GEN_21100016
>jgi|Dappu1|108258|fgenesh1_pg.C_scaffold_56000034	>jgi|Dappu1|236752|SNAP_00004810	jgi|Dappu1|238829|SNAP_00006887	>jgi|Dappu1|246666|SNAP_00014724	>jgi|Dappu1|61607|e_gw1.102.22.1
>jgi|Dappu1|108263|fgenesh1_pg.C_scaffold_56000039	>jgi|Dappu1|97949|fgenesh1_pg.C_scaffold_8000129	jgi|Dappu1|314800|NCBI_GNO_1200225	>jgi|Dappu1|246693|SNAP_00014751	>jgi|Dappu1|61592|e_gw1.102.19.1
>jgi|Dappu1|108264|fgenesh1_pg.C_scaffold_56000040	>jgi|Dappu1|236764|SNAP_00004822	jgi|Dappu1|238835|SNAP_00006893	>jgi|Dappu1|246719|SNAP_00014777	>jgi|Dappu1|259755|SNAP_00027813
>jgi|Dappu1|108281|fgenesh1_pg.C_scaffold_56000057	>jgi|Dappu1|236765|SNAP_00004823	jgi|Dappu1|314808|NCBI_GNO_1200233	>jgi|Dappu1|246747|SNAP_00014805	>jgi|Dappu1|259756|SNAP_00027814
>jgi|Dappu1|108283|fgenesh1_pg.C_scaffold_56000059	>jgi|Dappu1|97953|fgenesh1_pg.C_scaffold_8000133	jgi|Dappu1|238837|SNAP_00006895	>jgi|Dappu1|246750|SNAP_00014808	>jgi|Dappu1|259771|SNAP_00027829
>jgi|Dappu1|108284|fgenesh1_pg.C_scaffold_56000060	>jgi|Dappu1|313170|NCBI_GNO_0800119	jgi|Dappu1|238838|SNAP_00006896	>jgi|Dappu1|246757|SNAP_00014815	>jgi|Dappu1|325405|NCBI_GNO_7000024
>jgi|Dappu1|108285|fgenesh1_pg.C_scaffold_56000061	>jgi|Dappu1|313171|NCBI_GNO_0800120	jgi|Dappu1|314809|NCBI_GNO_1200234	>jgi|Dappu1|24681|gw1.18.130.1	>jgi|Dappu1|109962|fgenesh1_pg.C_scaffold_70000070
>jgi|Dappu1|108293|fgenesh1_pg.C_scaffold_56000069	>jgi|Dappu1|313172|NCBI_GNO_0800121	jgi|Dappu1|238839|SNAP_00006897	>jgi|Dappu1|246840|SNAP_00014898	>jgi|Dappu1|325464|NCBI_GNO_7000083
>jgi|Dappu1|108301|fgenesh1_pg.C_scaffold_56000077	>jgi|Dappu1|313174|NCBI_GNO_0800123	jgi|Dappu1|314811|NCBI_GNO_1200236	>jgi|Dappu1|246873|SNAP_00014931	>jgi|Dappu1|110010|fgenesh1_pg.C_scaffold_70000118
>jgi|Dappu1|108305|fgenesh1_pg.C_scaffold_56000081	>jgi|Dappu1|236786|SNAP_00004844	jgi|Dappu1|238840|SNAP_00006898	>jgi|Dappu1|246911|SNAP_00014969	>jgi|Dappu1|61982|e_gw1.110.39.1
>jgi|Dappu1|108307|fgenesh1_pg.C_scaffold_56000083	>jgi|Dappu1|313178|NCBI_GNO_0800127	jgi|Dappu1|314813|NCBI_GNO_1200238	>jgi|Dappu1|246940|SNAP_00014998	>jgi|Dappu1|228581|estExt_fgenesh1_pg.C_1100032
>jgi|Dappu1|108309|fgenesh1_pg.C_scaffold_56000085	>jgi|Dappu1|236791|SNAP_00004849	jgi|Dappu1|99651|fgenesh1_pg.C_scaffold_12000260	>jgi|Dappu1|247034|SNAP_00015092	>jgi|Dappu1|62353|e_gw1.116.93.1
>jgi|Dappu1|108312|fgenesh1_pg.C_scaffold_56000088	>jgi|Dappu1|97973|fgenesh1_pg.C_scaffold_8000153	jgi|Dappu1|314814|NCBI_GNO_1200239	>jgi|Dappu1|247035|SNAP_00015093	>jgi|Dappu1|329227|NCBI_GNO_11600043
>jgi|Dappu1|108321|fgenesh1_pg.C_scaffold_57000001	>jgi|Dappu1|97978|fgenesh1_pg.C_scaffold_8000158	jgi|Dappu1|314815|NCBI_GNO_1200240	>jgi|Dappu1|247046|SNAP_00015104	>jgi|Dappu1|62408|e_gw1.116.62.1
>jgi|Dappu1|108322|fgenesh1_pg.C_scaffold_57000002	>jgi|Dappu1|313187|NCBI_GNO_0800136	jgi|Dappu1|314816|NCBI_GNO_1200241	>jgi|Dappu1|247120|SNAP_00015178	>jgi|Dappu1|300985|PASA_GEN_11600005
>jgi|Dappu1|108328|fgenesh1_pg.C_scaffold_57000008	>jgi|Dappu1|313193|NCBI_GNO_0800142	jgi|Dappu1|238845|SNAP_00006903	>jgi|Dappu1|247122|SNAP_00015180	>jgi|Dappu1|113782|fgenesh1_pg.C_scaffold_116000045
>jgi|Dappu1|108329|fgenesh1_pg.C_scaffold_57000009	>jgi|Dappu1|97988|fgenesh1_pg.C_scaffold_8000168	jgi|Dappu1|314818|NCBI_GNO_1200243	>jgi|Dappu1|247139|SNAP_00015197	>jgi|Dappu1|329264|NCBI_GNO_11600081
>jgi|Dappu1|108333|fgenesh1_pg.C_scaffold_57000013	>jgi|Dappu1|313196|NCBI_GNO_0800145	jgi|Dappu1|99654|fgenesh1_pg.C_scaffold_12000263	>jgi|Dappu1|247142|SNAP_00015200	>jgi|Dappu1|228526|estExt_fgenesh1_pg.C_1070004
>jgi|Dappu1|108340|fgenesh1_pg.C_scaffold_57000020	>jgi|Dappu1|236811|SNAP_00004869	jgi|Dappu1|222994|estExt_fgenesh1_pg.C_120262	>jgi|Dappu1|247529|SNAP_00015587	>jgi|Dappu1|300664|PASA_GEN_10700019
>jgi|Dappu1|108342|fgenesh1_pg.C_scaffold_57000022	>jgi|Dappu1|236814|SNAP_00004872	jgi|Dappu1|238849|SNAP_00006907	>jgi|Dappu1|247535|SNAP_00015593	>jgi|Dappu1|113265|fgenesh1_pg.C_scaffold_107000041
>jgi|Dappu1|108343|fgenesh1_pg.C_scaffold_57000023	>jgi|Dappu1|97997|fgenesh1_pg.C_scaffold_8000177	jgi|Dappu1|238853|SNAP_00006911	>jgi|Dappu1|247536|SNAP_00015594	>jgi|Dappu1|257954|SNAP_00026012
>jgi|Dappu1|108347|fgenesh1_pg.C_scaffold_57000027	>jgi|Dappu1|97998|fgenesh1_pg.C_scaffold_8000178	jgi|Dappu1|99661|fgenesh1_pg.C_scaffold_12000270	>jgi|Dappu1|247592|SNAP_00015650	>jgi|Dappu1|331228|NCBI_GNO_16000004
>jgi|Dappu1|108348|fgenesh1_pg.C_scaffold_57000028	>jgi|Dappu1|236823|SNAP_00004881	jgi|Dappu1|314824|NCBI_GNO_1200249	>jgi|Dappu1|247718|SNAP_00015776	>jgi|Dappu1|261922|SNAP_00029980
>jgi|Dappu1|108353|fgenesh1_pg.C_scaffold_57000033	>jgi|Dappu1|236824|SNAP_00004882	jgi|Dappu1|314831|NCBI_GNO_1200256	>jgi|Dappu1|24774|gw1.46.105.1	>jgi|Dappu1|227633|estExt_fgenesh1_pg.C_800017
>jgi|Dappu1|108355|fgenesh1_pg.C_scaffold_57000035	>jgi|Dappu1|236826|SNAP_00004884	jgi|Dappu1|238866|SNAP_00006924	>jgi|Dappu1|247759|SNAP_00015817	>jgi|Dappu1|216236|estExt_Genewise1.C_800027
>jgi|Dappu1|108358|fgenesh1_pg.C_scaffold_57000038	>jgi|Dappu1|98001|fgenesh1_pg.C_scaffold_8000181	jgi|Dappu1|238867|SNAP_00006925	>jgi|Dappu1|247821|SNAP_00015879	>jgi|Dappu1|59376|e_gw1.80.47.1
>jgi|Dappu1|108365|fgenesh1_pg.C_scaffold_57000045	>jgi|Dappu1|236830|SNAP_00004888	jgi|Dappu1|238869|SNAP_00006927	>jgi|Dappu1|247860|SNAP_00015918	>jgi|Dappu1|308572|PASA_GEN_8000047
>jgi|Dappu1|108367|fgenesh1_pg.C_scaffold_57000047	>jgi|Dappu1|313207|NCBI_GNO_0800156	jgi|Dappu1|238870|SNAP_00006928	>jgi|Dappu1|247862|SNAP_00015920	>jgi|Dappu1|308549|PASA_GEN_8000015
>jgi|Dappu1|108368|fgenesh1_pg.C_scaffold_57000048	>jgi|Dappu1|236834|SNAP_00004892	jgi|Dappu1|238871|SNAP_00006929	>jgi|Dappu1|247884|SNAP_00015942	>jgi|Dappu1|326525|NCBI_GNO_8000062
>jgi|Dappu1|108370|fgenesh1_pg.C_scaffold_57000050	>jgi|Dappu1|308473|PASA_GEN_0800130	jgi|Dappu1|314838|NCBI_GNO_1200263	>jgi|Dappu1|248174|SNAP_00016232	>jgi|Dappu1|326526|NCBI_GNO_8000063
>jgi|Dappu1|108375|fgenesh1_pg.C_scaffold_57000055	>jgi|Dappu1|313211|NCBI_GNO_0800160	jgi|Dappu1|314839|NCBI_GNO_1200264	>jgi|Dappu1|248178|SNAP_00016236	>jgi|Dappu1|111071|fgenesh1_pg.C_scaffold_80000072
>jgi|Dappu1|108378|fgenesh1_pg.C_scaffold_57000058	>jgi|Dappu1|313214|NCBI_GNO_0800163	jgi|Dappu1|238878|SNAP_00006936	>jgi|Dappu1|248360|SNAP_00016418	>jgi|Dappu1|262919|SNAP_00030977
>jgi|Dappu1|108384|fgenesh1_pg.C_scaffold_57000064	>jgi|Dappu1|313222|NCBI_GNO_0800171	jgi|Dappu1|238879|SNAP_00006937	>jgi|Dappu1|248395|SNAP_00016453	>jgi|Dappu1|302186|PASA_GEN_16300001
>jgi|Dappu1|108386|fgenesh1_pg.C_scaffold_57000066	>jgi|Dappu1|308421|PASA_GEN_0800080	jgi|Dappu1|238880|SNAP_00006938	>jgi|Dappu1|248480|SNAP_00016538	>jgi|Dappu1|64148|e_gw1.163.68.1
>jgi|Dappu1|108389|fgenesh1_pg.C_scaffold_57000069	>jgi|Dappu1|236854|SNAP_00004912	jgi|Dappu1|314840|NCBI_GNO_1200265	>jgi|Dappu1|248652|SNAP_00016710	>jgi|Dappu1|331351|NCBI_GNO_16300007
>jgi|Dappu1|108392|fgenesh1_pg.C_scaffold_57000072	>jgi|Dappu1|236855|SNAP_00004913	jgi|Dappu1|238882|SNAP_00006940	>jgi|Dappu1|248669|SNAP_00016727	>jgi|Dappu1|262056|SNAP_00030114
>jgi|Dappu1|108393|fgenesh1_pg.C_scaffold_57000073	>jgi|Dappu1|236857|SNAP_00004915	jgi|Dappu1|238883|SNAP_00006941	>jgi|Dappu1|248678|SNAP_00016736	>jgi|Dappu1|8906|gw1.163.33.1
>jgi|Dappu1|108397|fgenesh1_pg.C_scaffold_57000077	>jgi|Dappu1|236859|SNAP_00004917	jgi|Dappu1|238888|SNAP_00006946	>jgi|Dappu1|248685|SNAP_00016743	>jgi|Dappu1|302199|PASA_GEN_16300017
>jgi|Dappu1|108399|fgenesh1_pg.C_scaffold_57000079	>jgi|Dappu1|98033|fgenesh1_pg.C_scaffold_8000213	jgi|Dappu1|314845|NCBI_GNO_1200270	>jgi|Dappu1|248708|SNAP_00016766	>jgi|Dappu1|302201|PASA_GEN_16300019
>jgi|Dappu1|108403|fgenesh1_pg.C_scaffold_57000083	>jgi|Dappu1|313239|NCBI_GNO_0800188	jgi|Dappu1|314846|NCBI_GNO_1200271	>jgi|Dappu1|248813|SNAP_00016871	>jgi|Dappu1|308594|PASA_GEN_8100004
>jgi|Dappu1|108405|fgenesh1_pg.C_scaffold_57000085	>jgi|Dappu1|308489|PASA_GEN_0800152	jgi|Dappu1|314847|NCBI_GNO_1200272	>jgi|Dappu1|248878|SNAP_00016936	>jgi|Dappu1|111114|fgenesh1_pg.C_scaffold_81000013
>jgi|Dappu1|108408|fgenesh1_pg.C_scaffold_57000088	>jgi|Dappu1|313246|NCBI_GNO_0800195	jgi|Dappu1|238893|SNAP_00006951	>jgi|Dappu1|248910|SNAP_00016968	>jgi|Dappu1|326593|NCBI_GNO_8100035
>jgi|Dappu1|108410|fgenesh1_pg.C_scaffold_57000090	>jgi|Dappu1|98050|fgenesh1_pg.C_scaffold_8000230	jgi|Dappu1|314849|NCBI_GNO_1200274	>jgi|Dappu1|248919|SNAP_00016977	>jgi|Dappu1|117176|fgenesh1_pg.C_scaffold_219000028
>jgi|Dappu1|108411|fgenesh1_pg.C_scaffold_57000091	>jgi|Dappu1|208374|estExt_Genewise1.C_80308	jgi|Dappu1|314850|NCBI_GNO_1200275	>jgi|Dappu1|248921|SNAP_00016979	>jgi|Dappu1|264538|SNAP_00032596
>jgi|Dappu1|108415|fgenesh1_pg.C_scaffold_57000095	>jgi|Dappu1|313249|NCBI_GNO_0800198	jgi|Dappu1|238894|SNAP_00006952	>jgi|Dappu1|248977|SNAP_00017035	>jgi|Dappu1|117183|fgenesh1_pg.C_scaffold_219000035
>jgi|Dappu1|108416|fgenesh1_pg.C_scaffold_57000096	>jgi|Dappu1|308428|PASA_GEN_0800088	jgi|Dappu1|99686|fgenesh1_pg.C_scaffold_12000295	>jgi|Dappu1|249008|SNAP_00017066	>jgi|Dappu1|113048|fgenesh1_pg.C_scaffold_104000006
>jgi|Dappu1|108419|fgenesh1_pg.C_scaffold_57000099	>jgi|Dappu1|308430|PASA_GEN_0800091	jgi|Dappu1|238896|SNAP_00006954	>jgi|Dappu1|249009|SNAP_00017067	>jgi|Dappu1|228461|estExt_fgenesh1_pg.C_1040010
>jgi|Dappu1|108421|fgenesh1_pg.C_scaffold_57000101	>jgi|Dappu1|308498|PASA_GEN_0800161	jgi|Dappu1|99687|fgenesh1_pg.C_scaffold_12000296	>jgi|Dappu1|249011|SNAP_00017069	>jgi|Dappu1|300598|PASA_GEN_10400009
>jgi|Dappu1|108427|fgenesh1_pg.C_scaffold_57000107	>jgi|Dappu1|308431|PASA_GEN_0800092	jgi|Dappu1|238898|SNAP_00006956	>jgi|Dappu1|249079|SNAP_00017137	>jgi|Dappu1|300608|PASA_GEN_10400022
>jgi|Dappu1|108429|fgenesh1_pg.C_scaffold_57000109	>jgi|Dappu1|98064|fgenesh1_pg.C_scaffold_8000244	jgi|Dappu1|238899|SNAP_00006957	>jgi|Dappu1|249123|SNAP_00017181	>jgi|Dappu1|300602|PASA_GEN_10400015
>jgi|Dappu1|108438|fgenesh1_pg.C_scaffold_58000009	>jgi|Dappu1|236902|SNAP_00004960	jgi|Dappu1|238900|SNAP_00006958	>jgi|Dappu1|249145|SNAP_00017203	>jgi|Dappu1|257703|SNAP_00025761
>jgi|Dappu1|108443|fgenesh1_pg.C_scaffold_58000014	>jgi|Dappu1|313262|NCBI_GNO_0800211	jgi|Dappu1|314855|NCBI_GNO_1200280	>jgi|Dappu1|249169|SNAP_00017227	>jgi|Dappu1|320352|NCBI_GNO_3500007
>jgi|Dappu1|108452|fgenesh1_pg.C_scaffold_58000023	>jgi|Dappu1|313263|NCBI_GNO_0800212	jgi|Dappu1|314856|NCBI_GNO_1200281	>jgi|Dappu1|249234|SNAP_00017292	>jgi|Dappu1|246118|SNAP_00014176
>jgi|Dappu1|108453|fgenesh1_pg.C_scaffold_58000024	>jgi|Dappu1|236909|SNAP_00004967	jgi|Dappu1|99691|fgenesh1_pg.C_scaffold_12000300	>jgi|Dappu1|249321|SNAP_00017379	>jgi|Dappu1|320383|NCBI_GNO_3500038
>jgi|Dappu1|108459|fgenesh1_pg.C_scaffold_58000030	>jgi|Dappu1|236913|SNAP_00004971	jgi|Dappu1|238904|SNAP_00006962	>jgi|Dappu1|249352|SNAP_00017410	>jgi|Dappu1|105179|fgenesh1_pg.C_scaffold_35000047
>jgi|Dappu1|108476|fgenesh1_pg.C_scaffold_58000047	>jgi|Dappu1|45102|e_gw1.8.583.1	jgi|Dappu1|314859|NCBI_GNO_1200284	>jgi|Dappu1|249508|SNAP_00017566	>jgi|Dappu1|320418|NCBI_GNO_3500075
>jgi|Dappu1|108478|fgenesh1_pg.C_scaffold_58000049	>jgi|Dappu1|313278|NCBI_GNO_0800227	jgi|Dappu1|238907|SNAP_00006965	>jgi|Dappu1|249655|SNAP_00017713	>jgi|Dappu1|320429|NCBI_GNO_3500086
>jgi|Dappu1|108484|fgenesh1_pg.C_scaffold_58000055	>jgi|Dappu1|236922|SNAP_00004980	jgi|Dappu1|301105|PASA_GEN_1200082	>jgi|Dappu1|249713|SNAP_00017771	>jgi|Dappu1|305166|PASA_GEN_3500020
>jgi|Dappu1|108490|fgenesh1_pg.C_scaffold_58000061	>jgi|Dappu1|236923|SNAP_00004981	jgi|Dappu1|314864|NCBI_GNO_1200289	>jgi|Dappu1|249722|SNAP_00017780	>jgi|Dappu1|320480|NCBI_GNO_3500137
>jgi|Dappu1|108507|fgenesh1_pg.C_scaffold_58000078	>jgi|Dappu1|236924|SNAP_00004982	jgi|Dappu1|99699|fgenesh1_pg.C_scaffold_12000308	>jgi|Dappu1|249723|SNAP_00017781	>jgi|Dappu1|225438|estExt_fgenesh1_pg.C_350142
>jgi|Dappu1|10851|gw1.67.38.1	>jgi|Dappu1|236927|SNAP_00004985	jgi|Dappu1|314867|NCBI_GNO_1200292	>jgi|Dappu1|249729|SNAP_00017787	>jgi|Dappu1|320499|NCBI_GNO_3500156
>jgi|Dappu1|108524|fgenesh1_pg.C_scaffold_58000095	>jgi|Dappu1|313286|NCBI_GNO_0800235	jgi|Dappu1|314870|NCBI_GNO_1200295	>jgi|Dappu1|249755|SNAP_00017813	>jgi|Dappu1|325287|NCBI_GNO_6900002
>jgi|Dappu1|108525|fgenesh1_pg.C_scaffold_58000096	>jgi|Dappu1|98095|fgenesh1_pg.C_scaffold_8000275	jgi|Dappu1|314871|NCBI_GNO_1200296	>jgi|Dappu1|249804|SNAP_00017862	>jgi|Dappu1|253168|SNAP_00021226
>jgi|Dappu1|108529|fgenesh1_pg.C_scaffold_58000100	>jgi|Dappu1|236933|SNAP_00004991	jgi|Dappu1|314872|NCBI_GNO_1200297	>jgi|Dappu1|249828|SNAP_00017886	>jgi|Dappu1|253175|SNAP_00021233
>jgi|Dappu1|108530|fgenesh1_pg.C_scaffold_58000101	>jgi|Dappu1|98098|fgenesh1_pg.C_scaffold_8000278	jgi|Dappu1|99701|fgenesh1_pg.C_scaffold_12000310	>jgi|Dappu1|250076|SNAP_00018134	>jgi|Dappu1|253227|SNAP_00021285
>jgi|Dappu1|108556|fgenesh1_pg.C_scaffold_59000001	>jgi|Dappu1|236935|SNAP_00004993	jgi|Dappu1|238920|SNAP_00006978	>jgi|Dappu1|250083|SNAP_00018141	>jgi|Dappu1|253237|SNAP_00021295
>jgi|Dappu1|108558|fgenesh1_pg.C_scaffold_59000003	>jgi|Dappu1|236936|SNAP_00004994	jgi|Dappu1|238921|SNAP_00006979	>jgi|Dappu1|250191|SNAP_00018249	>jgi|Dappu1|307710|PASA_GEN_6900013
>jgi|Dappu1|108559|fgenesh1_pg.C_scaffold_59000004	>jgi|Dappu1|236937|SNAP_00004995	jgi|Dappu1|238922|SNAP_00006980	>jgi|Dappu1|250214|SNAP_00018272	>jgi|Dappu1|58089|e_gw1.69.88.1
>jgi|Dappu1|108568|fgenesh1_pg.C_scaffold_59000013	>jgi|Dappu1|236940|SNAP_00004998	jgi|Dappu1|99703|fgenesh1_pg.C_scaffold_12000312	>jgi|Dappu1|250283|SNAP_00018341	>jgi|Dappu1|325370|NCBI_GNO_6900086
>jgi|Dappu1|108588|fgenesh1_pg.C_scaffold_59000033	>jgi|Dappu1|98099|fgenesh1_pg.C_scaffold_8000279	jgi|Dappu1|314876|NCBI_GNO_1200301	>jgi|Dappu1|25035|gw1.18.146.1	>jgi|Dappu1|227136|estExt_fgenesh1_pg.C_690080
>jgi|Dappu1|108596|fgenesh1_pg.C_scaffold_59000041	>jgi|Dappu1|236942|SNAP_00005000	jgi|Dappu1|238924|SNAP_00006982	>jgi|Dappu1|250459|SNAP_00018517	>jgi|Dappu1|326857|NCBI_GNO_8500005
>jgi|Dappu1|108602|fgenesh1_pg.C_scaffold_59000047	>jgi|Dappu1|236943|SNAP_00005001	jgi|Dappu1|238925|SNAP_00006983	>jgi|Dappu1|250516|SNAP_00018574	>jgi|Dappu1|255354|SNAP_00023412
>jgi|Dappu1|108603|fgenesh1_pg.C_scaffold_59000048	>jgi|Dappu1|236944|SNAP_00005002	jgi|Dappu1|314878|NCBI_GNO_1200303	>jgi|Dappu1|250559|SNAP_00018617	>jgi|Dappu1|111401|fgenesh1_pg.C_scaffold_85000024
>jgi|Dappu1|108605|fgenesh1_pg.C_scaffold_59000050	>jgi|Dappu1|236945|SNAP_00005003	jgi|Dappu1|314879|NCBI_GNO_1200304	>jgi|Dappu1|250634|SNAP_00018692	>jgi|Dappu1|308749|PASA_GEN_8500024
>jgi|Dappu1|108614|fgenesh1_pg.C_scaffold_59000059	>jgi|Dappu1|236946|SNAP_00005004	jgi|Dappu1|314880|NCBI_GNO_1200305	>jgi|Dappu1|250687|SNAP_00018745	>jgi|Dappu1|256485|SNAP_00024543
>jgi|Dappu1|108616|fgenesh1_pg.C_scaffold_59000061	>jgi|Dappu1|236949|SNAP_00005007	jgi|Dappu1|314881|NCBI_GNO_1200306	>jgi|Dappu1|250743|SNAP_00018801	>jgi|Dappu1|327709|NCBI_GNO_9400019
>jgi|Dappu1|108617|fgenesh1_pg.C_scaffold_59000062	>jgi|Dappu1|98101|fgenesh1_pg.C_scaffold_8000281	jgi|Dappu1|99705|fgenesh1_pg.C_scaffold_12000314	>jgi|Dappu1|250765|SNAP_00018823	>jgi|Dappu1|256497|SNAP_00024555
>jgi|Dappu1|108624|fgenesh1_pg.C_scaffold_59000069	>jgi|Dappu1|98102|fgenesh1_pg.C_scaffold_8000282	jgi|Dappu1|238928|SNAP_00006986	>jgi|Dappu1|250935|SNAP_00018993	>jgi|Dappu1|327713|NCBI_GNO_9400023
>jgi|Dappu1|108635|fgenesh1_pg.C_scaffold_59000080	>jgi|Dappu1|236953|SNAP_00005011	jgi|Dappu1|238929|SNAP_00006987	>jgi|Dappu1|250959|SNAP_00019017	>jgi|Dappu1|228142|estExt_fgenesh1_pg.C_940023
>jgi|Dappu1|108636|fgenesh1_pg.C_scaffold_59000081	>jgi|Dappu1|236960|SNAP_00005018	jgi|Dappu1|238930|SNAP_00006988	>jgi|Dappu1|250987|SNAP_00019045	>jgi|Dappu1|327730|NCBI_GNO_9400040
>jgi|Dappu1|108640|fgenesh1_pg.C_scaffold_59000085	>jgi|Dappu1|236961|SNAP_00005019	jgi|Dappu1|238931|SNAP_00006989	>jgi|Dappu1|25102|gw1.14.222.1	>jgi|Dappu1|327732|NCBI_GNO_9400042
>jgi|Dappu1|108644|fgenesh1_pg.C_scaffold_59000089	>jgi|Dappu1|236965|SNAP_00005023	jgi|Dappu1|238932|SNAP_00006990	>jgi|Dappu1|251164|SNAP_00019222	>jgi|Dappu1|327734|NCBI_GNO_9400044
>jgi|Dappu1|108646|fgenesh1_pg.C_scaffold_59000091	>jgi|Dappu1|236968|SNAP_00005026	jgi|Dappu1|314885|NCBI_GNO_1200310	>jgi|Dappu1|251222|SNAP_00019280	>jgi|Dappu1|231574|estExt_fgenesh1_kg.C_940003
>jgi|Dappu1|108658|fgenesh1_pg.C_scaffold_60000011	>jgi|Dappu1|236969|SNAP_00005027	jgi|Dappu1|314894|NCBI_GNO_1200319	>jgi|Dappu1|251241|SNAP_00019299	>jgi|Dappu1|256558|SNAP_00024616
>jgi|Dappu1|108687|fgenesh1_pg.C_scaffold_60000040	>jgi|Dappu1|313302|NCBI_GNO_0800251	jgi|Dappu1|314895|NCBI_GNO_1200320	>jgi|Dappu1|251247|SNAP_00019305	>jgi|Dappu1|256560|SNAP_00024618
>jgi|Dappu1|108704|fgenesh1_pg.C_scaffold_60000057	>jgi|Dappu1|313305|NCBI_GNO_0800254	jgi|Dappu1|314896|NCBI_GNO_1200321	>jgi|Dappu1|251266|SNAP_00019324	>jgi|Dappu1|334973|NCBI_GNO_46100006
>jgi|Dappu1|108766|fgenesh1_pg.C_scaffold_60000119	>jgi|Dappu1|313306|NCBI_GNO_0800255	jgi|Dappu1|187780|estExt_fgenesh1_pm.C_120072	>jgi|Dappu1|251616|SNAP_00019674	>jgi|Dappu1|267672|SNAP_00035730
>jgi|Dappu1|108767|fgenesh1_pg.C_scaffold_60000120	>jgi|Dappu1|236976|SNAP_00005034	jgi|Dappu1|314898|NCBI_GNO_1200323	>jgi|Dappu1|251710|SNAP_00019768	>jgi|Dappu1|114547|fgenesh1_pg.C_scaffold_133000014
>jgi|Dappu1|108768|fgenesh1_pg.C_scaffold_60000121	>jgi|Dappu1|236977|SNAP_00005035	jgi|Dappu1|238945|SNAP_00007003	>jgi|Dappu1|251731|SNAP_00019789	>jgi|Dappu1|330099|NCBI_GNO_13300036
>jgi|Dappu1|108769|fgenesh1_pg.C_scaffold_60000122	>jgi|Dappu1|313308|NCBI_GNO_0800257	jgi|Dappu1|238946|SNAP_00007004	>jgi|Dappu1|25177|gw1.50.51.1	>jgi|Dappu1|330100|NCBI_GNO_13300037
>jgi|Dappu1|108770|fgenesh1_pg.C_scaffold_60000123	>jgi|Dappu1|236979|SNAP_00005037	jgi|Dappu1|314900|NCBI_GNO_1200325	>jgi|Dappu1|251789|SNAP_00019847	>jgi|Dappu1|330105|NCBI_GNO_13300042
>jgi|Dappu1|108774|fgenesh1_pg.C_scaffold_60000127	>jgi|Dappu1|313309|NCBI_GNO_0800258	jgi|Dappu1|223019|estExt_fgenesh1_pg.C_120329	>jgi|Dappu1|25188|gw1.18.155.1	>jgi|Dappu1|111648|fgenesh1_pg.C_scaffold_87000080
>jgi|Dappu1|108778|fgenesh1_pg.C_scaffold_60000131	>jgi|Dappu1|236990|SNAP_00005048	jgi|Dappu1|314905|NCBI_GNO_1200330	>jgi|Dappu1|251928|SNAP_00019986	>jgi|Dappu1|308847|PASA_GEN_8700051
>jgi|Dappu1|108780|fgenesh1_pg.C_scaffold_60000133	>jgi|Dappu1|308520|PASA_GEN_0800188	jgi|Dappu1|314906|NCBI_GNO_1200331	>jgi|Dappu1|251980|SNAP_00020038	>jgi|Dappu1|308854|PASA_GEN_8700058
>jgi|Dappu1|108783|fgenesh1_pg.C_scaffold_60000136	>jgi|Dappu1|313327|NCBI_GNO_0800276	jgi|Dappu1|99723|fgenesh1_pg.C_scaffold_12000332	>jgi|Dappu1|251987|SNAP_00020045	>jgi|Dappu1|255710|SNAP_00023768
>jgi|Dappu1|108785|fgenesh1_pg.C_scaffold_60000138	>jgi|Dappu1|308521|PASA_GEN_0800189	jgi|Dappu1|238974|SNAP_00007032	>jgi|Dappu1|25199|gw1.18.156.1	>jgi|Dappu1|308826|PASA_GEN_8700025
>jgi|Dappu1|108789|fgenesh1_pg.C_scaffold_60000142	>jgi|Dappu1|313331|NCBI_GNO_0800280	jgi|Dappu1|314915|NCBI_GNO_1200340	>jgi|Dappu1|252060|SNAP_00020118	>jgi|Dappu1|227925|estExt_fgenesh1_pg.C_870137
>jgi|Dappu1|108792|fgenesh1_pg.C_scaffold_61000003	>jgi|Dappu1|193379|estExt_Genewise1Plus.C_80471	jgi|Dappu1|238980|SNAP_00007038	>jgi|Dappu1|25210|gw1.18.159.1	>jgi|Dappu1|327174|NCBI_GNO_8700120
>jgi|Dappu1|108793|fgenesh1_pg.C_scaffold_61000004	>jgi|Dappu1|237009|SNAP_00005067	jgi|Dappu1|314917|NCBI_GNO_1200342	>jgi|Dappu1|252189|SNAP_00020247	>jgi|Dappu1|304819|PASA_GEN_3000007
>jgi|Dappu1|108794|fgenesh1_pg.C_scaffold_61000005	>jgi|Dappu1|313343|NCBI_GNO_0800292	jgi|Dappu1|314918|NCBI_GNO_1200343	>jgi|Dappu1|252324|SNAP_00020382	>jgi|Dappu1|304828|PASA_GEN_3000017
>jgi|Dappu1|108797|fgenesh1_pg.C_scaffold_61000008	>jgi|Dappu1|98166|fgenesh1_pg.C_scaffold_8000346	jgi|Dappu1|238988|SNAP_00007046	>jgi|Dappu1|252394|SNAP_00020452	>jgi|Dappu1|104443|fgenesh1_pg.C_scaffold_30000088
>jgi|Dappu1|108808|fgenesh1_pg.C_scaffold_61000019	>jgi|Dappu1|98167|fgenesh1_pg.C_scaffold_8000347	jgi|Dappu1|238989|SNAP_00007047	>jgi|Dappu1|252500|SNAP_00020558	>jgi|Dappu1|104491|fgenesh1_pg.C_scaffold_30000136
>jgi|Dappu1|108819|fgenesh1_pg.C_scaffold_61000030	>jgi|Dappu1|237014|SNAP_00005072	jgi|Dappu1|238991|SNAP_00007049	>jgi|Dappu1|252505|SNAP_00020563	>jgi|Dappu1|319650|NCBI_GNO_3000131
>jgi|Dappu1|108820|fgenesh1_pg.C_scaffold_61000031	>jgi|Dappu1|98168|fgenesh1_pg.C_scaffold_8000348	jgi|Dappu1|314923|NCBI_GNO_1200348	>jgi|Dappu1|252527|SNAP_00020585	>jgi|Dappu1|319656|NCBI_GNO_3000137
>jgi|Dappu1|108846|fgenesh1_pg.C_scaffold_61000057	>jgi|Dappu1|313346|NCBI_GNO_0800295	jgi|Dappu1|314924|NCBI_GNO_1200349	>jgi|Dappu1|252596|SNAP_00020654	>jgi|Dappu1|252816|SNAP_00020874
>jgi|Dappu1|108864|fgenesh1_pg.C_scaffold_61000075	>jgi|Dappu1|313347|NCBI_GNO_0800296	jgi|Dappu1|314926|NCBI_GNO_1200351	>jgi|Dappu1|252660|SNAP_00020718	>jgi|Dappu1|325072|NCBI_GNO_6700035
>jgi|Dappu1|108870|fgenesh1_pg.C_scaffold_61000081	>jgi|Dappu1|308525|PASA_GEN_0800193	jgi|Dappu1|314927|NCBI_GNO_1200352	>jgi|Dappu1|252666|SNAP_00020724	>jgi|Dappu1|325074|NCBI_GNO_6700037
>jgi|Dappu1|108889|fgenesh1_pg.C_scaffold_61000100	>jgi|Dappu1|237019|SNAP_00005077	jgi|Dappu1|314929|NCBI_GNO_1200354	>jgi|Dappu1|252667|SNAP_00020725	>jgi|Dappu1|8235|gw1.67.24.1
>jgi|Dappu1|108908|fgenesh1_pg.C_scaffold_61000119	>jgi|Dappu1|237020|SNAP_00005078	jgi|Dappu1|314931|NCBI_GNO_1200356	>jgi|Dappu1|252775|SNAP_00020833	>jgi|Dappu1|252960|SNAP_00021018
>jgi|Dappu1|108909|fgenesh1_pg.C_scaffold_61000120	>jgi|Dappu1|313350|NCBI_GNO_0800299	jgi|Dappu1|239001|SNAP_00007059	>jgi|Dappu1|252776|SNAP_00020834	>jgi|Dappu1|307670|PASA_GEN_6700057
>jgi|Dappu1|108918|fgenesh1_pg.C_scaffold_61000129	>jgi|Dappu1|98177|fgenesh1_pg.C_scaffold_8000357	jgi|Dappu1|239002|SNAP_00007060	>jgi|Dappu1|252795|SNAP_00020853	>jgi|Dappu1|325166|NCBI_GNO_6700129
>jgi|Dappu1|108936|fgenesh1_pg.C_scaffold_61000147	>jgi|Dappu1|308531|PASA_GEN_0800200	jgi|Dappu1|239007|SNAP_00007065	>jgi|Dappu1|252891|SNAP_00020949	>jgi|Dappu1|325182|NCBI_GNO_6700145
>jgi|Dappu1|108937|fgenesh1_pg.C_scaffold_61000148	>jgi|Dappu1|98195|fgenesh1_pg.C_scaffold_8000375	jgi|Dappu1|239008|SNAP_00007066	>jgi|Dappu1|252976|SNAP_00021034	>jgi|Dappu1|252992|SNAP_00021050
>jgi|Dappu1|108947|fgenesh1_pg.C_scaffold_61000158	>jgi|Dappu1|98196|fgenesh1_pg.C_scaffold_8000376	jgi|Dappu1|239010|SNAP_00007068	>jgi|Dappu1|253057|SNAP_00021115	>jgi|Dappu1|325205|NCBI_GNO_6700168
>jgi|Dappu1|108949|fgenesh1_pg.C_scaffold_61000160	>jgi|Dappu1|237037|SNAP_00005095	jgi|Dappu1|99745|fgenesh1_pg.C_scaffold_12000354	>jgi|Dappu1|253081|SNAP_00021139	>jgi|Dappu1|325206|NCBI_GNO_6700169
>jgi|Dappu1|108981|fgenesh1_pg.C_scaffold_61000192	>jgi|Dappu1|237038|SNAP_00005096	jgi|Dappu1|239015|SNAP_00007073	>jgi|Dappu1|253187|SNAP_00021245	>jgi|Dappu1|258395|SNAP_00026453
>jgi|Dappu1|108997|fgenesh1_pg.C_scaffold_62000013	>jgi|Dappu1|237039|SNAP_00005097	jgi|Dappu1|99747|fgenesh1_pg.C_scaffold_12000356	>jgi|Dappu1|253189|SNAP_00021247	>jgi|Dappu1|265629|SNAP_00033687
>jgi|Dappu1|109011|fgenesh1_pg.C_scaffold_62000027	>jgi|Dappu1|237040|SNAP_00005098	jgi|Dappu1|236607|SNAP_00004665	>jgi|Dappu1|253216|SNAP_00021274	>jgi|Dappu1|109359|fgenesh1_pg.C_scaffold_65000012
>jgi|Dappu1|109017|fgenesh1_pg.C_scaffold_62000033	>jgi|Dappu1|237041|SNAP_00005099	jgi|Dappu1|222058|estExt_fgenesh1_pg.C_80011	>jgi|Dappu1|253251|SNAP_00021309	>jgi|Dappu1|307550|PASA_GEN_6500028
>jgi|Dappu1|109031|fgenesh1_pg.C_scaffold_62000047	>jgi|Dappu1|237044|SNAP_00005102	jgi|Dappu1|236619|SNAP_00004677	>jgi|Dappu1|253296|SNAP_00021354	>jgi|Dappu1|215380|estExt_Genewise1.C_650039
>jgi|Dappu1|109060|fgenesh1_pg.C_scaffold_62000076	>jgi|Dappu1|237045|SNAP_00005103	jgi|Dappu1|236622|SNAP_00004680	>jgi|Dappu1|253314|SNAP_00021372	>jgi|Dappu1|57727|e_gw1.65.135.1
>jgi|Dappu1|109094|fgenesh1_pg.C_scaffold_62000110	>jgi|Dappu1|308442|PASA_GEN_0800053	jgi|Dappu1|236623|SNAP_00004681	>jgi|Dappu1|253369|SNAP_00021427	>jgi|Dappu1|307538|PASA_GEN_6500012
>jgi|Dappu1|109112|fgenesh1_pg.C_scaffold_63000001	>jgi|Dappu1|317004|NCBI_GNO_1900001	jgi|Dappu1|97834|fgenesh1_pg.C_scaffold_8000014	>jgi|Dappu1|253378|SNAP_00021436	>jgi|Dappu1|324908|NCBI_GNO_6500109
>jgi|Dappu1|109138|fgenesh1_pg.C_scaffold_63000027	>jgi|Dappu1|241592|SNAP_00009650	jgi|Dappu1|236626|SNAP_00004684	>jgi|Dappu1|253387|SNAP_00021445	>jgi|Dappu1|63423|e_gw1.141.30.1
>jgi|Dappu1|109139|fgenesh1_pg.C_scaffold_63000028	>jgi|Dappu1|241601|SNAP_00009659	jgi|Dappu1|236631|SNAP_00004689	>jgi|Dappu1|253388|SNAP_00021446	>jgi|Dappu1|51801|e_gw1.27.97.1
>jgi|Dappu1|109158|fgenesh1_pg.C_scaffold_63000047	>jgi|Dappu1|101812|fgenesh1_pg.C_scaffold_19000006	jgi|Dappu1|222061|estExt_fgenesh1_pg.C_80017	>jgi|Dappu1|253390|SNAP_00021448	>jgi|Dappu1|103759|fgenesh1_pg.C_scaffold_27000006
>jgi|Dappu1|109162|fgenesh1_pg.C_scaffold_63000051	>jgi|Dappu1|241612|SNAP_00009670	jgi|Dappu1|222068|estExt_fgenesh1_pg.C_80025	>jgi|Dappu1|253419|SNAP_00021477	>jgi|Dappu1|51732|e_gw1.27.117.1
>jgi|Dappu1|109204|fgenesh1_pg.C_scaffold_63000093	>jgi|Dappu1|241615|SNAP_00009673	jgi|Dappu1|313077|NCBI_GNO_0800025	>jgi|Dappu1|253427|SNAP_00021485	>jgi|Dappu1|304241|PASA_GEN_2700005
>jgi|Dappu1|109224|fgenesh1_pg.C_scaffold_63000113	>jgi|Dappu1|241617|SNAP_00009675	jgi|Dappu1|313078|NCBI_GNO_0800026	>jgi|Dappu1|253430|SNAP_00021488	>jgi|Dappu1|244213|SNAP_00012271
>jgi|Dappu1|109227|fgenesh1_pg.C_scaffold_63000116	>jgi|Dappu1|223926|estExt_fgenesh1_pg.C_190016	jgi|Dappu1|236645|SNAP_00004703	>jgi|Dappu1|253433|SNAP_00021491	>jgi|Dappu1|244219|SNAP_00012277
>jgi|Dappu1|109229|fgenesh1_pg.C_scaffold_63000118	>jgi|Dappu1|317019|NCBI_GNO_1900016	jgi|Dappu1|222074|estExt_fgenesh1_pg.C_80033	>jgi|Dappu1|253444|SNAP_00021502	>jgi|Dappu1|244262|SNAP_00012320
>jgi|Dappu1|109247|fgenesh1_pg.C_scaffold_64000001	>jgi|Dappu1|241631|SNAP_00009689	jgi|Dappu1|230477|estExt_fgenesh1_kg.C_80003	>jgi|Dappu1|253475|SNAP_00021533	>jgi|Dappu1|35524|gw1.27.115.1
>jgi|Dappu1|109249|fgenesh1_pg.C_scaffold_64000003	>jgi|Dappu1|302773|PASA_GEN_1900003	jgi|Dappu1|208196|estExt_Genewise1.C_80042	>jgi|Dappu1|253493|SNAP_00021551	>jgi|Dappu1|319088|NCBI_GNO_2700154
>jgi|Dappu1|109251|fgenesh1_pg.C_scaffold_64000005	>jgi|Dappu1|317029|NCBI_GNO_1900026	jgi|Dappu1|222080|estExt_fgenesh1_pg.C_80039	>jgi|Dappu1|253508|SNAP_00021566	>jgi|Dappu1|116643|fgenesh1_pg.C_scaffold_192000008
>jgi|Dappu1|109260|fgenesh1_pg.C_scaffold_64000014	>jgi|Dappu1|223930|estExt_fgenesh1_pg.C_190038	jgi|Dappu1|222083|estExt_fgenesh1_pg.C_80042	>jgi|Dappu1|253512|SNAP_00021570	>jgi|Dappu1|116654|fgenesh1_pg.C_scaffold_192000019
>jgi|Dappu1|109262|fgenesh1_pg.C_scaffold_64000016	>jgi|Dappu1|101847|fgenesh1_pg.C_scaffold_19000041	jgi|Dappu1|236651|SNAP_00004709	>jgi|Dappu1|253528|SNAP_00021586	>jgi|Dappu1|268487|SNAP_00036545
>jgi|Dappu1|109267|fgenesh1_pg.C_scaffold_64000021	>jgi|Dappu1|302844|PASA_GEN_1900095	jgi|Dappu1|222086|estExt_fgenesh1_pg.C_80045	>jgi|Dappu1|253560|SNAP_00021618	>jgi|Dappu1|117382|fgenesh1_pg.C_scaffold_230000016
>jgi|Dappu1|109281|fgenesh1_pg.C_scaffold_64000035	>jgi|Dappu1|101856|fgenesh1_pg.C_scaffold_19000050	jgi|Dappu1|313094|NCBI_GNO_0800042	>jgi|Dappu1|253562|SNAP_00021620	>jgi|Dappu1|265090|SNAP_00033148
>jgi|Dappu1|109282|fgenesh1_pg.C_scaffold_64000036	>jgi|Dappu1|241655|SNAP_00009713	jgi|Dappu1|236661|SNAP_00004719	>jgi|Dappu1|253616|SNAP_00021674	>jgi|Dappu1|259804|SNAP_00027862
>jgi|Dappu1|109299|fgenesh1_pg.C_scaffold_64000053	>jgi|Dappu1|241662|SNAP_00009720	jgi|Dappu1|7593|gw1.8.175.1	>jgi|Dappu1|25363|gw1.29.182.1	>jgi|Dappu1|331098|NCBI_GNO_15700004
>jgi|Dappu1|109301|fgenesh1_pg.C_scaffold_64000055	>jgi|Dappu1|101866|fgenesh1_pg.C_scaffold_19000060	jgi|Dappu1|97873|fgenesh1_pg.C_scaffold_8000053	>jgi|Dappu1|253693|SNAP_00021751	>jgi|Dappu1|302021|PASA_GEN_15700004
>jgi|Dappu1|109304|fgenesh1_pg.C_scaffold_64000058	>jgi|Dappu1|101871|fgenesh1_pg.C_scaffold_19000065	jgi|Dappu1|97874|fgenesh1_pg.C_scaffold_8000054	>jgi|Dappu1|253732|SNAP_00021790	>jgi|Dappu1|302022|PASA_GEN_15700005
>jgi|Dappu1|109305|fgenesh1_pg.C_scaffold_64000059	>jgi|Dappu1|302784|PASA_GEN_1900016	jgi|Dappu1|236667|SNAP_00004725	>jgi|Dappu1|253741|SNAP_00021799	>jgi|Dappu1|331138|NCBI_GNO_15700044
>jgi|Dappu1|109306|fgenesh1_pg.C_scaffold_64000060	>jgi|Dappu1|302786|PASA_GEN_1900018	jgi|Dappu1|222094|estExt_fgenesh1_pg.C_80060	>jgi|Dappu1|253743|SNAP_00021801	>jgi|Dappu1|63937|e_gw1.157.4.1
>jgi|Dappu1|109312|fgenesh1_pg.C_scaffold_64000066	>jgi|Dappu1|223957|estExt_fgenesh1_pg.C_190080	jgi|Dappu1|313103|NCBI_GNO_0800051	>jgi|Dappu1|253759|SNAP_00021817	>jgi|Dappu1|331153|NCBI_GNO_15700059
>jgi|Dappu1|109314|fgenesh1_pg.C_scaffold_64000068	>jgi|Dappu1|241679|SNAP_00009737	jgi|Dappu1|313104|NCBI_GNO_0800052	>jgi|Dappu1|253786|SNAP_00021844	>jgi|Dappu1|332997|NCBI_GNO_21600006
>jgi|Dappu1|109322|fgenesh1_pg.C_scaffold_64000076	>jgi|Dappu1|317067|NCBI_GNO_1900064	jgi|Dappu1|313105|NCBI_GNO_0800053	>jgi|Dappu1|253850|SNAP_00021908	>jgi|Dappu1|264417|SNAP_00032475
>jgi|Dappu1|109327|fgenesh1_pg.C_scaffold_64000081	>jgi|Dappu1|317072|NCBI_GNO_1900069	jgi|Dappu1|97889|fgenesh1_pg.C_scaffold_8000069	>jgi|Dappu1|253862|SNAP_00021920	>jgi|Dappu1|116891|fgenesh1_pg.C_scaffold_206000003
>jgi|Dappu1|109333|fgenesh1_pg.C_scaffold_64000087	>jgi|Dappu1|210865|estExt_Genewise1.C_190128	jgi|Dappu1|44826|e_gw1.8.114.1	>jgi|Dappu1|253898|SNAP_00021956	>jgi|Dappu1|332753|NCBI_GNO_20600005
>jgi|Dappu1|109336|fgenesh1_pg.C_scaffold_64000090	>jgi|Dappu1|317080|NCBI_GNO_1900077	jgi|Dappu1|313115|NCBI_GNO_0800063	>jgi|Dappu1|253942|SNAP_00022000	>jgi|Dappu1|303382|PASA_GEN_20600001
>jgi|Dappu1|109337|fgenesh1_pg.C_scaffold_64000091	>jgi|Dappu1|101922|fgenesh1_pg.C_scaffold_19000116	jgi|Dappu1|222106|estExt_fgenesh1_pg.C_80076	>jgi|Dappu1|254087|SNAP_00022145	>jgi|Dappu1|330561|NCBI_GNO_14300022
>jgi|Dappu1|109339|fgenesh1_pg.C_scaffold_64000093	>jgi|Dappu1|317090|NCBI_GNO_1900087	jgi|Dappu1|313117|NCBI_GNO_0800065	>jgi|Dappu1|254140|SNAP_00022198	>jgi|Dappu1|267718|SNAP_00035776
>jgi|Dappu1|109343|fgenesh1_pg.C_scaffold_64000097	>jgi|Dappu1|101930|fgenesh1_pg.C_scaffold_19000124	jgi|Dappu1|222112|estExt_fgenesh1_pg.C_80084	>jgi|Dappu1|254142|SNAP_00022200	>jgi|Dappu1|115142|fgenesh1_pg.C_scaffold_146000010
>jgi|Dappu1|109346|fgenesh1_pg.C_scaffold_64000100	>jgi|Dappu1|101933|fgenesh1_pg.C_scaffold_19000127	jgi|Dappu1|236688|SNAP_00004746	>jgi|Dappu1|254177|SNAP_00022235	>jgi|Dappu1|330706|NCBI_GNO_14600019
>jgi|Dappu1|109351|fgenesh1_pg.C_scaffold_65000004	>jgi|Dappu1|241716|SNAP_00009774	jgi|Dappu1|97909|fgenesh1_pg.C_scaffold_8000089	>jgi|Dappu1|254221|SNAP_00022279	>jgi|Dappu1|330719|NCBI_GNO_14600032
>jgi|Dappu1|109353|fgenesh1_pg.C_scaffold_65000006	>jgi|Dappu1|223988|estExt_fgenesh1_pg.C_190127	jgi|Dappu1|313127|NCBI_GNO_0800075	>jgi|Dappu1|254225|SNAP_00022283	>jgi|Dappu1|116078|fgenesh1_pg.C_scaffold_174000007
>jgi|Dappu1|109355|fgenesh1_pg.C_scaffold_65000008	>jgi|Dappu1|241720|SNAP_00009778	jgi|Dappu1|97917|fgenesh1_pg.C_scaffold_8000097	>jgi|Dappu1|254441|SNAP_00022499	>jgi|Dappu1|229368|estExt_fgenesh1_pg.C_1740027
>jgi|Dappu1|109357|fgenesh1_pg.C_scaffold_65000010	>jgi|Dappu1|317102|NCBI_GNO_1900100	jgi|Dappu1|313131|NCBI_GNO_0800079	>jgi|Dappu1|254529|SNAP_00022587	>jgi|Dappu1|262733|SNAP_00030791
>jgi|Dappu1|109364|fgenesh1_pg.C_scaffold_65000017	>jgi|Dappu1|302864|PASA_GEN_1900122	jgi|Dappu1|236703|SNAP_00004761	>jgi|Dappu1|254614|SNAP_00022672	>jgi|Dappu1|8277|gw1.174.11.1
>jgi|Dappu1|109390|fgenesh1_pg.C_scaffold_65000043	>jgi|Dappu1|302865|PASA_GEN_1900125	jgi|Dappu1|313132|NCBI_GNO_0800080	>jgi|Dappu1|254618|SNAP_00022676	>jgi|Dappu1|331843|NCBI_GNO_17400050
>jgi|Dappu1|109393|fgenesh1_pg.C_scaffold_65000046	>jgi|Dappu1|302806|PASA_GEN_1900044	jgi|Dappu1|236707|SNAP_00004765	>jgi|Dappu1|254622|SNAP_00022680	>jgi|Dappu1|329402|NCBI_GNO_11900020
>jgi|Dappu1|109394|fgenesh1_pg.C_scaffold_65000047	>jgi|Dappu1|302867|PASA_GEN_1900127	jgi|Dappu1|97923|fgenesh1_pg.C_scaffold_8000103	>jgi|Dappu1|254648|SNAP_00022706	>jgi|Dappu1|113921|fgenesh1_pg.C_scaffold_119000030
>jgi|Dappu1|109397|fgenesh1_pg.C_scaffold_65000050	>jgi|Dappu1|317117|NCBI_GNO_1900115	jgi|Dappu1|236711|SNAP_00004769	>jgi|Dappu1|254676|SNAP_00022734	>jgi|Dappu1|113922|fgenesh1_pg.C_scaffold_119000031
>jgi|Dappu1|109398|fgenesh1_pg.C_scaffold_65000051	>jgi|Dappu1|101959|fgenesh1_pg.C_scaffold_19000153	jgi|Dappu1|313135|NCBI_GNO_0800084	>jgi|Dappu1|254695|SNAP_00022753	>jgi|Dappu1|118046|fgenesh1_pg.C_scaffold_291000015
>jgi|Dappu1|109399|fgenesh1_pg.C_scaffold_65000052	>jgi|Dappu1|317120|NCBI_GNO_1900118	jgi|Dappu1|97932|fgenesh1_pg.C_scaffold_8000112	>jgi|Dappu1|254702|SNAP_00022760	>jgi|Dappu1|301424|PASA_GEN_13100019
>jgi|Dappu1|109400|fgenesh1_pg.C_scaffold_65000053	>jgi|Dappu1|36719|gw1.19.362.1	jgi|Dappu1|236728|SNAP_00004786	>jgi|Dappu1|254703|SNAP_00022761	>jgi|Dappu1|333179|NCBI_GNO_22300024
>jgi|Dappu1|109401|fgenesh1_pg.C_scaffold_65000054	>jgi|Dappu1|101971|fgenesh1_pg.C_scaffold_19000165	jgi|Dappu1|236729|SNAP_00004787	>jgi|Dappu1|254833|SNAP_00022891	>jgi|Dappu1|115465|fgenesh1_pg.C_scaffold_156000024
>jgi|Dappu1|109410|fgenesh1_pg.C_scaffold_65000063	>jgi|Dappu1|241754|SNAP_00009812	jgi|Dappu1|308446|PASA_GEN_0800096	>jgi|Dappu1|254887|SNAP_00022945	>jgi|Dappu1|256946|SNAP_00025004
>jgi|Dappu1|109415|fgenesh1_pg.C_scaffold_65000068	>jgi|Dappu1|317132|NCBI_GNO_1900130	jgi|Dappu1|308447|PASA_GEN_0800097	>jgi|Dappu1|254940|SNAP_00022998	>jgi|Dappu1|328029|NCBI_GNO_9800011
>jgi|Dappu1|109417|fgenesh1_pg.C_scaffold_65000070	>jgi|Dappu1|49418|e_gw1.19.335.1	jgi|Dappu1|236733|SNAP_00004791	>jgi|Dappu1|254945|SNAP_00023003	>jgi|Dappu1|257014|SNAP_00025072
>jgi|Dappu1|109418|fgenesh1_pg.C_scaffold_65000071	>jgi|Dappu1|241761|SNAP_00009819	jgi|Dappu1|236741|SNAP_00004799	>jgi|Dappu1|255085|SNAP_00023143	>jgi|Dappu1|257020|SNAP_00025078
>jgi|Dappu1|109419|fgenesh1_pg.C_scaffold_65000072	>jgi|Dappu1|317144|NCBI_GNO_1900142	jgi|Dappu1|236742|SNAP_00004800	>jgi|Dappu1|255321|SNAP_00023379	>jgi|Dappu1|328078|NCBI_GNO_9800060
>jgi|Dappu1|109438|fgenesh1_pg.C_scaffold_65000091	>jgi|Dappu1|101991|fgenesh1_pg.C_scaffold_19000185	jgi|Dappu1|222125|estExt_fgenesh1_pg.C_80119	>jgi|Dappu1|255481|SNAP_00023539	>jgi|Dappu1|328080|NCBI_GNO_9800062
>jgi|Dappu1|109439|fgenesh1_pg.C_scaffold_65000092	>jgi|Dappu1|241770|SNAP_00009828	jgi|Dappu1|97942|fgenesh1_pg.C_scaffold_8000122	>jgi|Dappu1|255495|SNAP_00023553	>jgi|Dappu1|328085|NCBI_GNO_9800067
>jgi|Dappu1|109440|fgenesh1_pg.C_scaffold_65000093	>jgi|Dappu1|302820|PASA_GEN_1900063	jgi|Dappu1|236750|SNAP_00004808	>jgi|Dappu1|255498|SNAP_00023556	>jgi|Dappu1|309407|PASA_GEN_9800007
>jgi|Dappu1|109456|fgenesh1_pg.C_scaffold_66000003	>jgi|Dappu1|302821|PASA_GEN_1900064	jgi|Dappu1|236751|SNAP_00004809	>jgi|Dappu1|255504|SNAP_00023562	>jgi|Dappu1|114507|fgenesh1_pg.C_scaffold_132000030
>jgi|Dappu1|109458|fgenesh1_pg.C_scaffold_66000005	>jgi|Dappu1|317161|NCBI_GNO_1900160	jgi|Dappu1|236752|SNAP_00004810	>jgi|Dappu1|255533|SNAP_00023591	>jgi|Dappu1|260043|SNAP_00028101
>jgi|Dappu1|109462|fgenesh1_pg.C_scaffold_66000009	>jgi|Dappu1|241795|SNAP_00009853	jgi|Dappu1|313157|NCBI_GNO_0800106	>jgi|Dappu1|255566|SNAP_00023624	>jgi|Dappu1|330047|NCBI_GNO_13200038
>jgi|Dappu1|109465|fgenesh1_pg.C_scaffold_66000012	>jgi|Dappu1|241796|SNAP_00009854	jgi|Dappu1|97949|fgenesh1_pg.C_scaffold_8000129	>jgi|Dappu1|255569|SNAP_00023627	>jgi|Dappu1|330061|NCBI_GNO_13200052
>jgi|Dappu1|109466|fgenesh1_pg.C_scaffold_66000013	>jgi|Dappu1|302885|PASA_GEN_1900152	jgi|Dappu1|236764|SNAP_00004822	>jgi|Dappu1|255621|SNAP_00023679	>jgi|Dappu1|329664|NCBI_GNO_12500009
>jgi|Dappu1|109472|fgenesh1_pg.C_scaffold_66000019	>jgi|Dappu1|317164|NCBI_GNO_1900163	jgi|Dappu1|236765|SNAP_00004823	>jgi|Dappu1|255633|SNAP_00023691	>jgi|Dappu1|229525|estExt_fgenesh1_pg.C_2070006
>jgi|Dappu1|109493|fgenesh1_pg.C_scaffold_66000040	>jgi|Dappu1|102025|fgenesh1_pg.C_scaffold_19000219	jgi|Dappu1|97953|fgenesh1_pg.C_scaffold_8000133	>jgi|Dappu1|255654|SNAP_00023712	>jgi|Dappu1|332784|NCBI_GNO_20700005
>jgi|Dappu1|109494|fgenesh1_pg.C_scaffold_66000041	>jgi|Dappu1|241808|SNAP_00009866	jgi|Dappu1|97958|fgenesh1_pg.C_scaffold_8000138	>jgi|Dappu1|255675|SNAP_00023733	>jgi|Dappu1|65170|e_gw1.207.27.1
>jgi|Dappu1|109496|fgenesh1_pg.C_scaffold_66000043	>jgi|Dappu1|317175|NCBI_GNO_1900174	jgi|Dappu1|313170|NCBI_GNO_0800119	>jgi|Dappu1|255690|SNAP_00023748	>jgi|Dappu1|309214|PASA_GEN_9100034
>jgi|Dappu1|109498|fgenesh1_pg.C_scaffold_66000045	>jgi|Dappu1|241817|SNAP_00009875	jgi|Dappu1|313171|NCBI_GNO_0800120	>jgi|Dappu1|255722|SNAP_00023780	>jgi|Dappu1|256153|SNAP_00024211
>jgi|Dappu1|109501|fgenesh1_pg.C_scaffold_66000048	>jgi|Dappu1|102041|fgenesh1_pg.C_scaffold_19000235	jgi|Dappu1|313172|NCBI_GNO_0800121	>jgi|Dappu1|255778|SNAP_00023836	>jgi|Dappu1|327489|NCBI_GNO_9100063
>jgi|Dappu1|109504|fgenesh1_pg.C_scaffold_66000051	>jgi|Dappu1|102042|fgenesh1_pg.C_scaffold_19000236	jgi|Dappu1|313174|NCBI_GNO_0800123	>jgi|Dappu1|255780|SNAP_00023838	>jgi|Dappu1|309221|PASA_GEN_9100042
>jgi|Dappu1|109514|fgenesh1_pg.C_scaffold_66000061	>jgi|Dappu1|241823|SNAP_00009881	jgi|Dappu1|236786|SNAP_00004844	>jgi|Dappu1|255841|SNAP_00023899	>jgi|Dappu1|309222|PASA_GEN_9100043
>jgi|Dappu1|109518|fgenesh1_pg.C_scaffold_66000065	>jgi|Dappu1|241824|SNAP_00009882	jgi|Dappu1|35746|gw1.8.564.1	>jgi|Dappu1|255844|SNAP_00023902	>jgi|Dappu1|309202|PASA_GEN_9100018
>jgi|Dappu1|109519|fgenesh1_pg.C_scaffold_66000066	>jgi|Dappu1|317181|NCBI_GNO_1900180	jgi|Dappu1|313178|NCBI_GNO_0800127	>jgi|Dappu1|255987|SNAP_00024045	>jgi|Dappu1|256184|SNAP_00024242
>jgi|Dappu1|109520|fgenesh1_pg.C_scaffold_66000067	>jgi|Dappu1|241827|SNAP_00009885	jgi|Dappu1|236791|SNAP_00004849	>jgi|Dappu1|256105|SNAP_00024163	>jgi|Dappu1|256206|SNAP_00024264
>jgi|Dappu1|109521|fgenesh1_pg.C_scaffold_66000068	>jgi|Dappu1|308914|PASA_GEN_8900005	jgi|Dappu1|97973|fgenesh1_pg.C_scaffold_8000153	>jgi|Dappu1|256141|SNAP_00024199	>jgi|Dappu1|327539|NCBI_GNO_9100113
>jgi|Dappu1|109522|fgenesh1_pg.C_scaffold_66000069	>jgi|Dappu1|255869|SNAP_00023927	jgi|Dappu1|97975|fgenesh1_pg.C_scaffold_8000155	>jgi|Dappu1|256146|SNAP_00024204	>jgi|Dappu1|252351|SNAP_00020409
>jgi|Dappu1|109538|fgenesh1_pg.C_scaffold_66000085	>jgi|Dappu1|255875|SNAP_00023933	jgi|Dappu1|97978|fgenesh1_pg.C_scaffold_8000158	>jgi|Dappu1|256217|SNAP_00024275	>jgi|Dappu1|324716|NCBI_GNO_6400051
>jgi|Dappu1|109556|fgenesh1_pg.C_scaffold_66000103	>jgi|Dappu1|255877|SNAP_00023935	jgi|Dappu1|313187|NCBI_GNO_0800136	>jgi|Dappu1|256218|SNAP_00024276	>jgi|Dappu1|324733|NCBI_GNO_6400068
>jgi|Dappu1|109559|fgenesh1_pg.C_scaffold_66000106	>jgi|Dappu1|255880|SNAP_00023938	jgi|Dappu1|313193|NCBI_GNO_0800142	>jgi|Dappu1|256219|SNAP_00024277	>jgi|Dappu1|18251|gw1.64.88.1
>jgi|Dappu1|109561|fgenesh1_pg.C_scaffold_66000108	>jgi|Dappu1|308917|PASA_GEN_8900008	jgi|Dappu1|97988|fgenesh1_pg.C_scaffold_8000168	>jgi|Dappu1|256239|SNAP_00024297	>jgi|Dappu1|231329|estExt_fgenesh1_kg.C_640003
>jgi|Dappu1|109562|fgenesh1_pg.C_scaffold_66000109	>jgi|Dappu1|111848|fgenesh1_pg.C_scaffold_89000011	jgi|Dappu1|313196|NCBI_GNO_0800145	>jgi|Dappu1|256303|SNAP_00024361	>jgi|Dappu1|109338|fgenesh1_pg.C_scaffold_64000092
>jgi|Dappu1|109565|fgenesh1_pg.C_scaffold_66000112	>jgi|Dappu1|308920|PASA_GEN_8900012	jgi|Dappu1|236811|SNAP_00004869	>jgi|Dappu1|256305|SNAP_00024363	>jgi|Dappu1|111469|fgenesh1_pg.C_scaffold_86000016
>jgi|Dappu1|109566|fgenesh1_pg.C_scaffold_66000113	>jgi|Dappu1|255895|SNAP_00023953	jgi|Dappu1|97992|fgenesh1_pg.C_scaffold_8000172	>jgi|Dappu1|256316|SNAP_00024374	>jgi|Dappu1|28711|gw1.86.109.1
>jgi|Dappu1|109584|fgenesh1_pg.C_scaffold_67000002	>jgi|Dappu1|255900|SNAP_00023958	jgi|Dappu1|236814|SNAP_00004872	>jgi|Dappu1|256476|SNAP_00024534	>jgi|Dappu1|28709|gw1.86.108.1
>jgi|Dappu1|109586|fgenesh1_pg.C_scaffold_67000004	>jgi|Dappu1|111869|fgenesh1_pg.C_scaffold_89000032	jgi|Dappu1|97997|fgenesh1_pg.C_scaffold_8000177	>jgi|Dappu1|256719|SNAP_00024777	>jgi|Dappu1|260141|SNAP_00028199
>jgi|Dappu1|109589|fgenesh1_pg.C_scaffold_67000007	>jgi|Dappu1|308942|PASA_GEN_8900036	jgi|Dappu1|97998|fgenesh1_pg.C_scaffold_8000178	>jgi|Dappu1|256761|SNAP_00024819	>jgi|Dappu1|114595|fgenesh1_pg.C_scaffold_134000027
>jgi|Dappu1|109592|fgenesh1_pg.C_scaffold_67000010	>jgi|Dappu1|255915|SNAP_00023973	jgi|Dappu1|236823|SNAP_00004881	>jgi|Dappu1|256809|SNAP_00024867	>jgi|Dappu1|260190|SNAP_00028248
>jgi|Dappu1|109593|fgenesh1_pg.C_scaffold_67000011	>jgi|Dappu1|255921|SNAP_00023979	jgi|Dappu1|236824|SNAP_00004882	>jgi|Dappu1|256839|SNAP_00024897	>jgi|Dappu1|320173|NCBI_GNO_3400009
>jgi|Dappu1|109602|fgenesh1_pg.C_scaffold_67000020	>jgi|Dappu1|111874|fgenesh1_pg.C_scaffold_89000037	jgi|Dappu1|236826|SNAP_00004884	>jgi|Dappu1|257007|SNAP_00025065	>jgi|Dappu1|245902|SNAP_00013960
>jgi|Dappu1|109621|fgenesh1_pg.C_scaffold_67000039	>jgi|Dappu1|255925|SNAP_00023983	jgi|Dappu1|98001|fgenesh1_pg.C_scaffold_8000181	>jgi|Dappu1|257105|SNAP_00025163	>jgi|Dappu1|245911|SNAP_00013969
>jgi|Dappu1|109640|fgenesh1_pg.C_scaffold_67000058	>jgi|Dappu1|255931|SNAP_00023989	jgi|Dappu1|236830|SNAP_00004888	>jgi|Dappu1|257175|SNAP_00025233	>jgi|Dappu1|245928|SNAP_00013986
>jgi|Dappu1|109647|fgenesh1_pg.C_scaffold_67000065	>jgi|Dappu1|255932|SNAP_00023990	jgi|Dappu1|313207|NCBI_GNO_0800156	>jgi|Dappu1|257307|SNAP_00025365	>jgi|Dappu1|105121|fgenesh1_pg.C_scaffold_34000130
>jgi|Dappu1|109648|fgenesh1_pg.C_scaffold_67000066	>jgi|Dappu1|255940|SNAP_00023998	jgi|Dappu1|236834|SNAP_00004892	>jgi|Dappu1|257336|SNAP_00025394	>jgi|Dappu1|225377|estExt_fgenesh1_pg.C_340131
>jgi|Dappu1|109654|fgenesh1_pg.C_scaffold_67000072	>jgi|Dappu1|111884|fgenesh1_pg.C_scaffold_89000047	jgi|Dappu1|308473|PASA_GEN_0800130	>jgi|Dappu1|257338|SNAP_00025396	>jgi|Dappu1|246062|SNAP_00014120
>jgi|Dappu1|109655|fgenesh1_pg.C_scaffold_67000073	>jgi|Dappu1|308928|PASA_GEN_8900022	jgi|Dappu1|313211|NCBI_GNO_0800160	>jgi|Dappu1|257367|SNAP_00025425	>jgi|Dappu1|256746|SNAP_00024804
>jgi|Dappu1|109658|fgenesh1_pg.C_scaffold_67000076	>jgi|Dappu1|327313|NCBI_GNO_8900044	jgi|Dappu1|313214|NCBI_GNO_0800163	>jgi|Dappu1|257369|SNAP_00025427	>jgi|Dappu1|256792|SNAP_00024850
>jgi|Dappu1|109659|fgenesh1_pg.C_scaffold_67000077	>jgi|Dappu1|327316|NCBI_GNO_8900048	jgi|Dappu1|313216|NCBI_GNO_0800165	>jgi|Dappu1|257441|SNAP_00025499	>jgi|Dappu1|327902|NCBI_GNO_9600070
>jgi|Dappu1|109662|fgenesh1_pg.C_scaffold_67000080	>jgi|Dappu1|308947|PASA_GEN_8900043	jgi|Dappu1|313222|NCBI_GNO_0800171	>jgi|Dappu1|257448|SNAP_00025506	>jgi|Dappu1|256815|SNAP_00024873
>jgi|Dappu1|109673|fgenesh1_pg.C_scaffold_67000091	>jgi|Dappu1|255953|SNAP_00024011	jgi|Dappu1|308421|PASA_GEN_0800080	>jgi|Dappu1|257484|SNAP_00025542	>jgi|Dappu1|262814|SNAP_00030872
>jgi|Dappu1|109683|fgenesh1_pg.C_scaffold_67000101	>jgi|Dappu1|255954|SNAP_00024012	jgi|Dappu1|236854|SNAP_00004912	>jgi|Dappu1|257513|SNAP_00025571	>jgi|Dappu1|17209|gw1.176.23.1
>jgi|Dappu1|109686|fgenesh1_pg.C_scaffold_67000104	>jgi|Dappu1|111894|fgenesh1_pg.C_scaffold_89000057	jgi|Dappu1|236855|SNAP_00004913	>jgi|Dappu1|257534|SNAP_00025592	>jgi|Dappu1|331906|NCBI_GNO_17600031
>jgi|Dappu1|109689|fgenesh1_pg.C_scaffold_67000107	>jgi|Dappu1|327323|NCBI_GNO_8900055	jgi|Dappu1|236857|SNAP_00004915	>jgi|Dappu1|25761|gw1.9.357.1	>jgi|Dappu1|229321|estExt_fgenesh1_pg.C_1730001
>jgi|Dappu1|109697|fgenesh1_pg.C_scaffold_67000115	>jgi|Dappu1|111901|fgenesh1_pg.C_scaffold_89000064	jgi|Dappu1|236859|SNAP_00004917	>jgi|Dappu1|257611|SNAP_00025669	>jgi|Dappu1|229323|estExt_fgenesh1_pg.C_1730006
>jgi|Dappu1|109716|fgenesh1_pg.C_scaffold_67000134	>jgi|Dappu1|111902|fgenesh1_pg.C_scaffold_89000065	jgi|Dappu1|98033|fgenesh1_pg.C_scaffold_8000213	>jgi|Dappu1|257616|SNAP_00025674	>jgi|Dappu1|229324|estExt_fgenesh1_pg.C_1730007
>jgi|Dappu1|109720|fgenesh1_pg.C_scaffold_67000138	>jgi|Dappu1|308952|PASA_GEN_8900048	jgi|Dappu1|313239|NCBI_GNO_0800188	>jgi|Dappu1|257720|SNAP_00025778	>jgi|Dappu1|331750|NCBI_GNO_17300025
>jgi|Dappu1|109723|fgenesh1_pg.C_scaffold_67000141	>jgi|Dappu1|308930|PASA_GEN_8900024	jgi|Dappu1|308489|PASA_GEN_0800152	>jgi|Dappu1|257795|SNAP_00025853	>jgi|Dappu1|302449|PASA_GEN_17300023
>jgi|Dappu1|109731|fgenesh1_pg.C_scaffold_68000001	>jgi|Dappu1|111912|fgenesh1_pg.C_scaffold_89000075	jgi|Dappu1|313246|NCBI_GNO_0800195	>jgi|Dappu1|257842|SNAP_00025900	>jgi|Dappu1|302454|PASA_GEN_17300029
>jgi|Dappu1|109735|fgenesh1_pg.C_scaffold_68000005	>jgi|Dappu1|255985|SNAP_00024043	jgi|Dappu1|98050|fgenesh1_pg.C_scaffold_8000230	>jgi|Dappu1|257869|SNAP_00025927	>jgi|Dappu1|255284|SNAP_00023342
>jgi|Dappu1|109736|fgenesh1_pg.C_scaffold_68000006	>jgi|Dappu1|247689|SNAP_00015747	jgi|Dappu1|208374|estExt_Genewise1.C_80308	>jgi|Dappu1|257872|SNAP_00025930	>jgi|Dappu1|330880|NCBI_GNO_15100022
>jgi|Dappu1|109739|fgenesh1_pg.C_scaffold_68000009	>jgi|Dappu1|225708|estExt_fgenesh1_pg.C_410003	jgi|Dappu1|313249|NCBI_GNO_0800198	>jgi|Dappu1|257960|SNAP_00026018	>jgi|Dappu1|330891|NCBI_GNO_15100033
>jgi|Dappu1|109740|fgenesh1_pg.C_scaffold_68000010	>jgi|Dappu1|305825|PASA_GEN_4100001	jgi|Dappu1|308428|PASA_GEN_0800088	>jgi|Dappu1|257981|SNAP_00026039	>jgi|Dappu1|330892|NCBI_GNO_15100034
>jgi|Dappu1|109747|fgenesh1_pg.C_scaffold_68000017	>jgi|Dappu1|106162|fgenesh1_pg.C_scaffold_41000007	jgi|Dappu1|308430|PASA_GEN_0800091	>jgi|Dappu1|258185|SNAP_00026243	>jgi|Dappu1|302666|PASA_GEN_18000003
>jgi|Dappu1|109756|fgenesh1_pg.C_scaffold_68000026	>jgi|Dappu1|247705|SNAP_00015763	jgi|Dappu1|308498|PASA_GEN_0800161	>jgi|Dappu1|258271|SNAP_00026329	>jgi|Dappu1|116763|fgenesh1_pg.C_scaffold_198000005
>jgi|Dappu1|109761|fgenesh1_pg.C_scaffold_68000031	>jgi|Dappu1|247707|SNAP_00015765	jgi|Dappu1|308431|PASA_GEN_0800092	>jgi|Dappu1|258329|SNAP_00026387	>jgi|Dappu1|116764|fgenesh1_pg.C_scaffold_198000006
>jgi|Dappu1|109762|fgenesh1_pg.C_scaffold_68000032	>jgi|Dappu1|106165|fgenesh1_pg.C_scaffold_41000010	jgi|Dappu1|98064|fgenesh1_pg.C_scaffold_8000244	>jgi|Dappu1|258385|SNAP_00026443	>jgi|Dappu1|93831|fgenesh1_kg.C_scaffold_452000001
>jgi|Dappu1|109763|fgenesh1_pg.C_scaffold_68000033	>jgi|Dappu1|321453|NCBI_GNO_4100008	jgi|Dappu1|236902|SNAP_00004960	>jgi|Dappu1|258391|SNAP_00026449	>jgi|Dappu1|115861|fgenesh1_pg.C_scaffold_167000022
>jgi|Dappu1|109764|fgenesh1_pg.C_scaffold_68000034	>jgi|Dappu1|106167|fgenesh1_pg.C_scaffold_41000012	jgi|Dappu1|313262|NCBI_GNO_0800211	>jgi|Dappu1|258443|SNAP_00026501	>jgi|Dappu1|113333|fgenesh1_pg.C_scaffold_109000004
>jgi|Dappu1|109765|fgenesh1_pg.C_scaffold_68000035	>jgi|Dappu1|321456|NCBI_GNO_4100011	jgi|Dappu1|313263|NCBI_GNO_0800212	>jgi|Dappu1|258444|SNAP_00026502	>jgi|Dappu1|328790|NCBI_GNO_10900018
>jgi|Dappu1|109767|fgenesh1_pg.C_scaffold_68000037	>jgi|Dappu1|106171|fgenesh1_pg.C_scaffold_41000016	jgi|Dappu1|236909|SNAP_00004967	>jgi|Dappu1|258510|SNAP_00026568	>jgi|Dappu1|328791|NCBI_GNO_10900019
>jgi|Dappu1|109768|fgenesh1_pg.C_scaffold_68000038	>jgi|Dappu1|247721|SNAP_00015779	jgi|Dappu1|222205|estExt_fgenesh1_pg.C_80249	>jgi|Dappu1|258574|SNAP_00026632	>jgi|Dappu1|300687|PASA_GEN_10900001
>jgi|Dappu1|109770|fgenesh1_pg.C_scaffold_68000040	>jgi|Dappu1|247723|SNAP_00015781	jgi|Dappu1|236913|SNAP_00004971	>jgi|Dappu1|258576|SNAP_00026634	>jgi|Dappu1|328803|NCBI_GNO_10900031
>jgi|Dappu1|109771|fgenesh1_pg.C_scaffold_68000041	>jgi|Dappu1|247725|SNAP_00015783	jgi|Dappu1|45102|e_gw1.8.583.1	>jgi|Dappu1|258613|SNAP_00026671	>jgi|Dappu1|300700|PASA_GEN_10900014
>jgi|Dappu1|109776|fgenesh1_pg.C_scaffold_68000046	>jgi|Dappu1|106172|fgenesh1_pg.C_scaffold_41000017	jgi|Dappu1|313278|NCBI_GNO_0800227	>jgi|Dappu1|258733|SNAP_00026791	>jgi|Dappu1|7618|gw1.299.12.1
>jgi|Dappu1|109777|fgenesh1_pg.C_scaffold_68000047	>jgi|Dappu1|247728|SNAP_00015786	jgi|Dappu1|236922|SNAP_00004980	>jgi|Dappu1|258844|SNAP_00026902	>jgi|Dappu1|266245|SNAP_00034303
>jgi|Dappu1|109778|fgenesh1_pg.C_scaffold_68000048	>jgi|Dappu1|247729|SNAP_00015787	jgi|Dappu1|236923|SNAP_00004981	>jgi|Dappu1|258924|SNAP_00026982	>jgi|Dappu1|322523|NCBI_GNO_4800006
>jgi|Dappu1|109780|fgenesh1_pg.C_scaffold_68000050	>jgi|Dappu1|247730|SNAP_00015788	jgi|Dappu1|236924|SNAP_00004982	>jgi|Dappu1|258966|SNAP_00027024	>jgi|Dappu1|322524|NCBI_GNO_4800007
>jgi|Dappu1|109792|fgenesh1_pg.C_scaffold_68000062	>jgi|Dappu1|321466|NCBI_GNO_4100021	jgi|Dappu1|236927|SNAP_00004985	>jgi|Dappu1|258980|SNAP_00027038	>jgi|Dappu1|306301|PASA_GEN_4800025
>jgi|Dappu1|109794|fgenesh1_pg.C_scaffold_68000064	>jgi|Dappu1|106175|fgenesh1_pg.C_scaffold_41000020	jgi|Dappu1|313286|NCBI_GNO_0800235	>jgi|Dappu1|259133|SNAP_00027191	>jgi|Dappu1|249275|SNAP_00017333
>jgi|Dappu1|109796|fgenesh1_pg.C_scaffold_68000066	>jgi|Dappu1|247738|SNAP_00015796	jgi|Dappu1|98095|fgenesh1_pg.C_scaffold_8000275	>jgi|Dappu1|259222|SNAP_00027280	>jgi|Dappu1|107217|fgenesh1_pg.C_scaffold_48000025
>jgi|Dappu1|109800|fgenesh1_pg.C_scaffold_68000070	>jgi|Dappu1|321481|NCBI_GNO_4100036	jgi|Dappu1|236933|SNAP_00004991	>jgi|Dappu1|259286|SNAP_00027344	>jgi|Dappu1|306286|PASA_GEN_4800008
>jgi|Dappu1|109801|fgenesh1_pg.C_scaffold_68000071	>jgi|Dappu1|247763|SNAP_00015821	jgi|Dappu1|98098|fgenesh1_pg.C_scaffold_8000278	>jgi|Dappu1|259346|SNAP_00027404	>jgi|Dappu1|249398|SNAP_00017456
>jgi|Dappu1|109804|fgenesh1_pg.C_scaffold_68000074	>jgi|Dappu1|247764|SNAP_00015822	jgi|Dappu1|236935|SNAP_00004993	>jgi|Dappu1|25935|gw1.34.78.1	>jgi|Dappu1|265467|SNAP_00033525
>jgi|Dappu1|109808|fgenesh1_pg.C_scaffold_69000003	>jgi|Dappu1|247766|SNAP_00015824	jgi|Dappu1|236936|SNAP_00004994	>jgi|Dappu1|259374|SNAP_00027432	>jgi|Dappu1|302226|PASA_GEN_16400001
>jgi|Dappu1|109812|fgenesh1_pg.C_scaffold_69000007	>jgi|Dappu1|247768|SNAP_00015826	jgi|Dappu1|236937|SNAP_00004995	>jgi|Dappu1|259484|SNAP_00027542	>jgi|Dappu1|115758|fgenesh1_pg.C_scaffold_164000013
>jgi|Dappu1|109816|fgenesh1_pg.C_scaffold_69000011	>jgi|Dappu1|321488|NCBI_GNO_4100043	jgi|Dappu1|236940|SNAP_00004998	>jgi|Dappu1|259486|SNAP_00027544	>jgi|Dappu1|63835|e_gw1.152.25.1
>jgi|Dappu1|109817|fgenesh1_pg.C_scaffold_69000012	>jgi|Dappu1|106191|fgenesh1_pg.C_scaffold_41000036	jgi|Dappu1|98099|fgenesh1_pg.C_scaffold_8000279	>jgi|Dappu1|259489|SNAP_00027547	>jgi|Dappu1|116399|fgenesh1_pg.C_scaffold_183000016
>jgi|Dappu1|109829|fgenesh1_pg.C_scaffold_69000024	>jgi|Dappu1|247774|SNAP_00015832	jgi|Dappu1|236942|SNAP_00005000	>jgi|Dappu1|259492|SNAP_00027550	>jgi|Dappu1|116424|fgenesh1_pg.C_scaffold_183000041
>jgi|Dappu1|109837|fgenesh1_pg.C_scaffold_69000032	>jgi|Dappu1|321492|NCBI_GNO_4100047	jgi|Dappu1|236943|SNAP_00005001	>jgi|Dappu1|25953|gw1.50.59.1	>jgi|Dappu1|63773|e_gw1.148.9.1
>jgi|Dappu1|109840|fgenesh1_pg.C_scaffold_69000035	>jgi|Dappu1|247777|SNAP_00015835	jgi|Dappu1|236944|SNAP_00005002	>jgi|Dappu1|259555|SNAP_00027613	>jgi|Dappu1|115242|fgenesh1_pg.C_scaffold_148000031
>jgi|Dappu1|109842|fgenesh1_pg.C_scaffold_69000037	>jgi|Dappu1|106195|fgenesh1_pg.C_scaffold_41000040	jgi|Dappu1|236945|SNAP_00005003	>jgi|Dappu1|259570|SNAP_00027628	>jgi|Dappu1|333901|NCBI_GNO_27500012
>jgi|Dappu1|109849|fgenesh1_pg.C_scaffold_69000044	>jgi|Dappu1|321500|NCBI_GNO_4100055	jgi|Dappu1|236946|SNAP_00005004	>jgi|Dappu1|259573|SNAP_00027631	>jgi|Dappu1|301489|PASA_GEN_13600001
>jgi|Dappu1|109856|fgenesh1_pg.C_scaffold_69000051	>jgi|Dappu1|247787|SNAP_00015845	jgi|Dappu1|236949|SNAP_00005007	>jgi|Dappu1|259577|SNAP_00027635	>jgi|Dappu1|329554|NCBI_GNO_12200003
>jgi|Dappu1|109858|fgenesh1_pg.C_scaffold_69000053	>jgi|Dappu1|247789|SNAP_00015847	jgi|Dappu1|98101|fgenesh1_pg.C_scaffold_8000281	>jgi|Dappu1|259603|SNAP_00027661	>jgi|Dappu1|114095|fgenesh1_pg.C_scaffold_122000023
>jgi|Dappu1|109859|fgenesh1_pg.C_scaffold_69000054	>jgi|Dappu1|247793|SNAP_00015851	jgi|Dappu1|98102|fgenesh1_pg.C_scaffold_8000282	>jgi|Dappu1|259615|SNAP_00027673	>jgi|Dappu1|304400|PASA_GEN_28300006
>jgi|Dappu1|109868|fgenesh1_pg.C_scaffold_69000063	>jgi|Dappu1|247794|SNAP_00015852	jgi|Dappu1|236953|SNAP_00005011	>jgi|Dappu1|259616|SNAP_00027674	>jgi|Dappu1|329435|NCBI_GNO_12000021
>jgi|Dappu1|109870|fgenesh1_pg.C_scaffold_69000065	>jgi|Dappu1|106201|fgenesh1_pg.C_scaffold_41000046	jgi|Dappu1|236960|SNAP_00005018	>jgi|Dappu1|259636|SNAP_00027694	>jgi|Dappu1|116182|fgenesh1_pg.C_scaffold_177000009
>jgi|Dappu1|109883|fgenesh1_pg.C_scaffold_69000078	>jgi|Dappu1|106202|fgenesh1_pg.C_scaffold_41000047	jgi|Dappu1|236961|SNAP_00005019	>jgi|Dappu1|259641|SNAP_00027699	>jgi|Dappu1|116478|fgenesh1_pg.C_scaffold_186000001
>jgi|Dappu1|109897|fgenesh1_pg.C_scaffold_70000005	>jgi|Dappu1|106203|fgenesh1_pg.C_scaffold_41000048	jgi|Dappu1|236965|SNAP_00005023	>jgi|Dappu1|259648|SNAP_00027706	>jgi|Dappu1|300923|PASA_GEN_11400003
>jgi|Dappu1|109902|fgenesh1_pg.C_scaffold_70000010	>jgi|Dappu1|321514|NCBI_GNO_4100069	jgi|Dappu1|236968|SNAP_00005026	>jgi|Dappu1|259663|SNAP_00027721	>jgi|Dappu1|62235|e_gw1.114.41.1
>jgi|Dappu1|109914|fgenesh1_pg.C_scaffold_70000022	>jgi|Dappu1|225719|estExt_fgenesh1_pg.C_410053	jgi|Dappu1|236969|SNAP_00005027	>jgi|Dappu1|259813|SNAP_00027871	>jgi|Dappu1|113646|fgenesh1_pg.C_scaffold_114000035
>jgi|Dappu1|109928|fgenesh1_pg.C_scaffold_70000036	>jgi|Dappu1|106209|fgenesh1_pg.C_scaffold_41000054	jgi|Dappu1|313302|NCBI_GNO_0800251	>jgi|Dappu1|259818|SNAP_00027876	>jgi|Dappu1|115551|fgenesh1_pg.C_scaffold_159000005
>jgi|Dappu1|109931|fgenesh1_pg.C_scaffold_70000039	>jgi|Dappu1|247805|SNAP_00015863	jgi|Dappu1|193332|estExt_Genewise1Plus.C_80416	>jgi|Dappu1|260008|SNAP_00028066	>jgi|Dappu1|302042|PASA_GEN_15900003
>jgi|Dappu1|109941|fgenesh1_pg.C_scaffold_70000049	>jgi|Dappu1|305831|PASA_GEN_4100007	jgi|Dappu1|313305|NCBI_GNO_0800254	>jgi|Dappu1|260025|SNAP_00028083	>jgi|Dappu1|332385|NCBI_GNO_19000006
>jgi|Dappu1|109945|fgenesh1_pg.C_scaffold_70000053	>jgi|Dappu1|106217|fgenesh1_pg.C_scaffold_41000062	jgi|Dappu1|313306|NCBI_GNO_0800255	>jgi|Dappu1|260036|SNAP_00028094	>jgi|Dappu1|263510|SNAP_00031568
>jgi|Dappu1|109951|fgenesh1_pg.C_scaffold_70000059	>jgi|Dappu1|106218|fgenesh1_pg.C_scaffold_41000063	jgi|Dappu1|236976|SNAP_00005034	>jgi|Dappu1|260055|SNAP_00028113	>jgi|Dappu1|333878|NCBI_GNO_27400002
>jgi|Dappu1|109952|fgenesh1_pg.C_scaffold_70000060	>jgi|Dappu1|247812|SNAP_00015870	jgi|Dappu1|236977|SNAP_00005035	>jgi|Dappu1|260072|SNAP_00028130	>jgi|Dappu1|108374|fgenesh1_pg.C_scaffold_57000054
>jgi|Dappu1|109956|fgenesh1_pg.C_scaffold_70000064	>jgi|Dappu1|321529|NCBI_GNO_4100084	jgi|Dappu1|313308|NCBI_GNO_0800257	>jgi|Dappu1|260137|SNAP_00028195	>jgi|Dappu1|231255|estExt_fgenesh1_kg.C_570002
>jgi|Dappu1|109958|fgenesh1_pg.C_scaffold_70000066	>jgi|Dappu1|321530|NCBI_GNO_4100085	jgi|Dappu1|236979|SNAP_00005037	>jgi|Dappu1|260163|SNAP_00028221	>jgi|Dappu1|93055|fgenesh1_kg.C_scaffold_57000003
>jgi|Dappu1|109961|fgenesh1_pg.C_scaffold_70000069	>jgi|Dappu1|321531|NCBI_GNO_4100086	jgi|Dappu1|313309|NCBI_GNO_0800258	>jgi|Dappu1|260172|SNAP_00028230	>jgi|Dappu1|260373|SNAP_00028431
>jgi|Dappu1|109963|fgenesh1_pg.C_scaffold_70000071	>jgi|Dappu1|321532|NCBI_GNO_4100087	jgi|Dappu1|222243|estExt_fgenesh1_pg.C_80315	>jgi|Dappu1|260274|SNAP_00028332	>jgi|Dappu1|114724|fgenesh1_pg.C_scaffold_137000023
>jgi|Dappu1|109971|fgenesh1_pg.C_scaffold_70000079	>jgi|Dappu1|106222|fgenesh1_pg.C_scaffold_41000067	jgi|Dappu1|222245|estExt_fgenesh1_pg.C_80317	>jgi|Dappu1|260288|SNAP_00028346	>jgi|Dappu1|114730|fgenesh1_pg.C_scaffold_137000029
>jgi|Dappu1|109974|fgenesh1_pg.C_scaffold_70000082	>jgi|Dappu1|247819|SNAP_00015877	jgi|Dappu1|236990|SNAP_00005048	>jgi|Dappu1|260289|SNAP_00028347	>jgi|Dappu1|330281|NCBI_GNO_13700037
>jgi|Dappu1|109985|fgenesh1_pg.C_scaffold_70000093	>jgi|Dappu1|247820|SNAP_00015878	jgi|Dappu1|308520|PASA_GEN_0800188	>jgi|Dappu1|26032|gw1.48.43.1	>jgi|Dappu1|114743|fgenesh1_pg.C_scaffold_137000042
>jgi|Dappu1|109997|fgenesh1_pg.C_scaffold_70000105	>jgi|Dappu1|247832|SNAP_00015890	jgi|Dappu1|313327|NCBI_GNO_0800276	>jgi|Dappu1|260329|SNAP_00028387	>jgi|Dappu1|114231|fgenesh1_pg.C_scaffold_126000009
>jgi|Dappu1|109998|fgenesh1_pg.C_scaffold_70000106	>jgi|Dappu1|247833|SNAP_00015891	jgi|Dappu1|308521|PASA_GEN_0800189	>jgi|Dappu1|260337|SNAP_00028395	>jgi|Dappu1|118191|fgenesh1_pg.C_scaffold_315000002
>jgi|Dappu1|109999|fgenesh1_pg.C_scaffold_70000107	>jgi|Dappu1|321541|NCBI_GNO_4100096	jgi|Dappu1|313331|NCBI_GNO_0800280	>jgi|Dappu1|260349|SNAP_00028407	>jgi|Dappu1|229854|estExt_fgenesh1_pg.C_3560005
>jgi|Dappu1|110001|fgenesh1_pg.C_scaffold_70000109	>jgi|Dappu1|247836|SNAP_00015894	jgi|Dappu1|193379|estExt_Genewise1Plus.C_80471	>jgi|Dappu1|260405|SNAP_00028463	>jgi|Dappu1|119127|fgenesh1_pg.C_scaffold_604000003
>jgi|Dappu1|110002|fgenesh1_pg.C_scaffold_70000110	>jgi|Dappu1|247839|SNAP_00015897	jgi|Dappu1|237009|SNAP_00005067	>jgi|Dappu1|260522|SNAP_00028580	>jgi|Dappu1|118265|fgenesh1_pg.C_scaffold_328000002
>jgi|Dappu1|110008|fgenesh1_pg.C_scaffold_70000116	>jgi|Dappu1|106230|fgenesh1_pg.C_scaffold_41000075	jgi|Dappu1|313343|NCBI_GNO_0800292	>jgi|Dappu1|260523|SNAP_00028581	>jgi|Dappu1|115900|fgenesh1_pg.C_scaffold_169000002
>jgi|Dappu1|110011|fgenesh1_pg.C_scaffold_70000119	>jgi|Dappu1|321547|NCBI_GNO_4100102	jgi|Dappu1|98166|fgenesh1_pg.C_scaffold_8000346	>jgi|Dappu1|260534|SNAP_00028592	>jgi|Dappu1|302262|PASA_GEN_16900011
>jgi|Dappu1|110012|fgenesh1_pg.C_scaffold_70000120	>jgi|Dappu1|247845|SNAP_00015903	jgi|Dappu1|98167|fgenesh1_pg.C_scaffold_8000347	>jgi|Dappu1|260542|SNAP_00028600	>jgi|Dappu1|115916|fgenesh1_pg.C_scaffold_169000018
>jgi|Dappu1|110014|fgenesh1_pg.C_scaffold_70000122	>jgi|Dappu1|321549|NCBI_GNO_4100104	jgi|Dappu1|237014|SNAP_00005072	>jgi|Dappu1|260543|SNAP_00028601	>jgi|Dappu1|303621|PASA_GEN_22100001
>jgi|Dappu1|110022|fgenesh1_pg.C_scaffold_70000130	>jgi|Dappu1|106232|fgenesh1_pg.C_scaffold_41000077	jgi|Dappu1|98168|fgenesh1_pg.C_scaffold_8000348	>jgi|Dappu1|260581|SNAP_00028639	>jgi|Dappu1|303627|PASA_GEN_22100008
>jgi|Dappu1|110024|fgenesh1_pg.C_scaffold_70000132	>jgi|Dappu1|247849|SNAP_00015907	jgi|Dappu1|313346|NCBI_GNO_0800295	>jgi|Dappu1|260678|SNAP_00028736	>jgi|Dappu1|333132|NCBI_GNO_22100011
>jgi|Dappu1|110025|fgenesh1_pg.C_scaffold_70000133	>jgi|Dappu1|321553|NCBI_GNO_4100108	jgi|Dappu1|313347|NCBI_GNO_0800296	>jgi|Dappu1|26070|gw1.13.351.1	>jgi|Dappu1|333133|NCBI_GNO_22100012
>jgi|Dappu1|110039|fgenesh1_pg.C_scaffold_70000147	>jgi|Dappu1|247854|SNAP_00015912	jgi|Dappu1|308525|PASA_GEN_0800193	>jgi|Dappu1|260707|SNAP_00028765	>jgi|Dappu1|301004|PASA_GEN_11700004
>jgi|Dappu1|110044|fgenesh1_pg.C_scaffold_70000152	>jgi|Dappu1|247855|SNAP_00015913	jgi|Dappu1|237019|SNAP_00005077	>jgi|Dappu1|260744|SNAP_00028802	>jgi|Dappu1|333781|NCBI_GNO_26400001
>jgi|Dappu1|110047|fgenesh1_pg.C_scaffold_70000155	>jgi|Dappu1|247856|SNAP_00015914	jgi|Dappu1|237020|SNAP_00005078	>jgi|Dappu1|260748|SNAP_00028806	>jgi|Dappu1|65902|e_gw1.264.8.1
>jgi|Dappu1|110056|fgenesh1_pg.C_scaffold_70000164	>jgi|Dappu1|106236|fgenesh1_pg.C_scaffold_41000081	jgi|Dappu1|313350|NCBI_GNO_0800299	>jgi|Dappu1|260773|SNAP_00028831	>jgi|Dappu1|36892|gw1.124.24.1
>jgi|Dappu1|110058|fgenesh1_pg.C_scaffold_70000166	>jgi|Dappu1|321559|NCBI_GNO_4100114	jgi|Dappu1|98177|fgenesh1_pg.C_scaffold_8000357	>jgi|Dappu1|260795|SNAP_00028853	>jgi|Dappu1|229224|estExt_fgenesh1_pg.C_1620007
>jgi|Dappu1|110060|fgenesh1_pg.C_scaffold_71000001	>jgi|Dappu1|247867|SNAP_00015925	jgi|Dappu1|308531|PASA_GEN_0800200	>jgi|Dappu1|260920|SNAP_00028978	>jgi|Dappu1|115643|fgenesh1_pg.C_scaffold_162000018
>jgi|Dappu1|110062|fgenesh1_pg.C_scaffold_71000003	>jgi|Dappu1|321564|NCBI_GNO_4100119	jgi|Dappu1|98195|fgenesh1_pg.C_scaffold_8000375	>jgi|Dappu1|260923|SNAP_00028981	>jgi|Dappu1|331332|NCBI_GNO_16200041
>jgi|Dappu1|110065|fgenesh1_pg.C_scaffold_71000006	>jgi|Dappu1|106242|fgenesh1_pg.C_scaffold_41000087	jgi|Dappu1|98196|fgenesh1_pg.C_scaffold_8000376	>jgi|Dappu1|260927|SNAP_00028985	>jgi|Dappu1|115674|fgenesh1_pg.C_scaffold_162000049
>jgi|Dappu1|110066|fgenesh1_pg.C_scaffold_71000007	>jgi|Dappu1|321566|NCBI_GNO_4100121	jgi|Dappu1|237037|SNAP_00005095	>jgi|Dappu1|260928|SNAP_00028986	>jgi|Dappu1|267893|SNAP_00035951
>jgi|Dappu1|110068|fgenesh1_pg.C_scaffold_71000009	>jgi|Dappu1|321568|NCBI_GNO_4100123	jgi|Dappu1|237038|SNAP_00005096	>jgi|Dappu1|260935|SNAP_00028993	>jgi|Dappu1|339477|NCBI_GNO_330900002
>jgi|Dappu1|110075|fgenesh1_pg.C_scaffold_71000016	>jgi|Dappu1|247874|SNAP_00015932	jgi|Dappu1|237039|SNAP_00005097	>jgi|Dappu1|260938|SNAP_00028996	>jgi|Dappu1|264704|SNAP_00032762
>jgi|Dappu1|110076|fgenesh1_pg.C_scaffold_71000017	>jgi|Dappu1|106245|fgenesh1_pg.C_scaffold_41000090	jgi|Dappu1|237040|SNAP_00005098	>jgi|Dappu1|261067|SNAP_00029125	>jgi|Dappu1|119666|fgenesh1_pg.C_scaffold_867000002
>jgi|Dappu1|110077|fgenesh1_pg.C_scaffold_71000018	>jgi|Dappu1|321571|NCBI_GNO_4100126	jgi|Dappu1|237041|SNAP_00005099	>jgi|Dappu1|261113|SNAP_00029171	>jgi|Dappu1|336128|NCBI_GNO_86700003
>jgi|Dappu1|110089|fgenesh1_pg.C_scaffold_71000030	>jgi|Dappu1|321573|NCBI_GNO_4100128	jgi|Dappu1|237043|SNAP_00005101	>jgi|Dappu1|261119|SNAP_00029177	>jgi|Dappu1|65530|e_gw1.227.5.1
>jgi|Dappu1|110090|fgenesh1_pg.C_scaffold_71000031	>jgi|Dappu1|321575|NCBI_GNO_4100130	jgi|Dappu1|237044|SNAP_00005102	>jgi|Dappu1|261131|SNAP_00029189	>jgi|Dappu1|305061|PASA_GEN_32700001
>jgi|Dappu1|110092|fgenesh1_pg.C_scaffold_71000033	>jgi|Dappu1|106250|fgenesh1_pg.C_scaffold_41000095	jgi|Dappu1|237045|SNAP_00005103	>jgi|Dappu1|261134|SNAP_00029192	>jgi|Dappu1|302765|PASA_GEN_18800001
>jgi|Dappu1|110093|fgenesh1_pg.C_scaffold_71000034	>jgi|Dappu1|106251|fgenesh1_pg.C_scaffold_41000096	jgi|Dappu1|98199|fgenesh1_pg.C_scaffold_8000379	>jgi|Dappu1|261170|SNAP_00029228	>jgi|Dappu1|263683|SNAP_00031741
>jgi|Dappu1|110094|fgenesh1_pg.C_scaffold_71000035	>jgi|Dappu1|247892|SNAP_00015950	jgi|Dappu1|308442|PASA_GEN_0800053	>jgi|Dappu1|261174|SNAP_00029232	>jgi|Dappu1|332550|NCBI_GNO_19500024
>jgi|Dappu1|110102|fgenesh1_pg.C_scaffold_71000043	>jgi|Dappu1|247893|SNAP_00015951	jgi|Dappu1|317004|NCBI_GNO_1900001	>jgi|Dappu1|261325|SNAP_00029383	>jgi|Dappu1|65035|e_gw1.195.6.1
>jgi|Dappu1|110108|fgenesh1_pg.C_scaffold_71000049	>jgi|Dappu1|305851|PASA_GEN_4100032	jgi|Dappu1|241592|SNAP_00009650	>jgi|Dappu1|261329|SNAP_00029387	>jgi|Dappu1|65032|e_gw1.195.2.1
>jgi|Dappu1|110109|fgenesh1_pg.C_scaffold_71000050	>jgi|Dappu1|321588|NCBI_GNO_4100143	jgi|Dappu1|241601|SNAP_00009659	>jgi|Dappu1|261401|SNAP_00029459	>jgi|Dappu1|261546|SNAP_00029604
>jgi|Dappu1|110111|fgenesh1_pg.C_scaffold_71000052	>jgi|Dappu1|106264|fgenesh1_pg.C_scaffold_41000109	jgi|Dappu1|101812|fgenesh1_pg.C_scaffold_19000006	>jgi|Dappu1|261407|SNAP_00029465	>jgi|Dappu1|336629|NCBI_GNO_109100002
>jgi|Dappu1|110115|fgenesh1_pg.C_scaffold_71000056	>jgi|Dappu1|106265|fgenesh1_pg.C_scaffold_41000110	jgi|Dappu1|241612|SNAP_00009670	>jgi|Dappu1|261497|SNAP_00029555	>jgi|Dappu1|267907|SNAP_00035965
>jgi|Dappu1|110119|fgenesh1_pg.C_scaffold_71000060	>jgi|Dappu1|247907|SNAP_00015965	jgi|Dappu1|241615|SNAP_00009673	>jgi|Dappu1|261506|SNAP_00029564	>jgi|Dappu1|66856|e_gw1.507.4.1
>jgi|Dappu1|110126|fgenesh1_pg.C_scaffold_71000067	>jgi|Dappu1|321592|NCBI_GNO_4100147	jgi|Dappu1|241617|SNAP_00009675	>jgi|Dappu1|261530|SNAP_00029588	>jgi|Dappu1|332332|NCBI_GNO_18700044
>jgi|Dappu1|110127|fgenesh1_pg.C_scaffold_71000068	>jgi|Dappu1|321593|NCBI_GNO_4100148	jgi|Dappu1|223926|estExt_fgenesh1_pg.C_190016	>jgi|Dappu1|261665|SNAP_00029723	>jgi|Dappu1|266073|SNAP_00034131
>jgi|Dappu1|110130|fgenesh1_pg.C_scaffold_71000071	>jgi|Dappu1|247911|SNAP_00015969	jgi|Dappu1|317019|NCBI_GNO_1900016	>jgi|Dappu1|261708|SNAP_00029766	>jgi|Dappu1|119530|fgenesh1_pg.C_scaffold_789000004
>jgi|Dappu1|110133|fgenesh1_pg.C_scaffold_71000074	>jgi|Dappu1|106268|fgenesh1_pg.C_scaffold_41000113	jgi|Dappu1|317023|NCBI_GNO_1900020	>jgi|Dappu1|261749|SNAP_00029807	>jgi|Dappu1|264194|SNAP_00032252
>jgi|Dappu1|110140|fgenesh1_pg.C_scaffold_72000007	>jgi|Dappu1|247916|SNAP_00015974	jgi|Dappu1|241631|SNAP_00009689	>jgi|Dappu1|261751|SNAP_00029809	>jgi|Dappu1|331186|NCBI_GNO_15800029
>jgi|Dappu1|110141|fgenesh1_pg.C_scaffold_72000008	>jgi|Dappu1|247919|SNAP_00015977	jgi|Dappu1|302773|PASA_GEN_1900003	>jgi|Dappu1|261767|SNAP_00029825	>jgi|Dappu1|114273|fgenesh1_pg.C_scaffold_127000006
>jgi|Dappu1|110143|fgenesh1_pg.C_scaffold_72000010	>jgi|Dappu1|247921|SNAP_00015979	jgi|Dappu1|317029|NCBI_GNO_1900026	>jgi|Dappu1|261768|SNAP_00029826	>jgi|Dappu1|329802|NCBI_GNO_12700027
>jgi|Dappu1|110154|fgenesh1_pg.C_scaffold_72000021	>jgi|Dappu1|247922|SNAP_00015980	jgi|Dappu1|223930|estExt_fgenesh1_pg.C_190038	>jgi|Dappu1|261769|SNAP_00029827	>jgi|Dappu1|329813|NCBI_GNO_12700038
>jgi|Dappu1|110156|fgenesh1_pg.C_scaffold_72000023	>jgi|Dappu1|106272|fgenesh1_pg.C_scaffold_41000117	jgi|Dappu1|101847|fgenesh1_pg.C_scaffold_19000041	>jgi|Dappu1|261770|SNAP_00029828	>jgi|Dappu1|333603|NCBI_GNO_24700010
>jgi|Dappu1|110163|fgenesh1_pg.C_scaffold_72000030	>jgi|Dappu1|247931|SNAP_00015989	jgi|Dappu1|317034|NCBI_GNO_1900031	>jgi|Dappu1|261771|SNAP_00029829	>jgi|Dappu1|69822|e_gw1.3817.1.1
>jgi|Dappu1|110171|fgenesh1_pg.C_scaffold_72000038	>jgi|Dappu1|247933|SNAP_00015991	jgi|Dappu1|302844|PASA_GEN_1900095	>jgi|Dappu1|261772|SNAP_00029830	>jgi|Dappu1|66495|e_gw1.373.2.1
>jgi|Dappu1|110178|fgenesh1_pg.C_scaffold_72000045	>jgi|Dappu1|247938|SNAP_00015996	jgi|Dappu1|317038|NCBI_GNO_1900035	>jgi|Dappu1|261773|SNAP_00029831	>jgi|Dappu1|337057|NCBI_GNO_132100002
>jgi|Dappu1|110187|fgenesh1_pg.C_scaffold_72000054	>jgi|Dappu1|247939|SNAP_00015997	jgi|Dappu1|101856|fgenesh1_pg.C_scaffold_19000050	>jgi|Dappu1|261917|SNAP_00029975	>jgi|Dappu1|336458|NCBI_GNO_101900004
>jgi|Dappu1|110191|fgenesh1_pg.C_scaffold_72000058	>jgi|Dappu1|305854|PASA_GEN_4100035	jgi|Dappu1|223935|estExt_fgenesh1_pg.C_190051	>jgi|Dappu1|261930|SNAP_00029988	>jgi|Dappu1|115038|fgenesh1_pg.C_scaffold_144000008
>jgi|Dappu1|110195|fgenesh1_pg.C_scaffold_72000062	>jgi|Dappu1|106275|fgenesh1_pg.C_scaffold_41000120	jgi|Dappu1|241655|SNAP_00009713	>jgi|Dappu1|262014|SNAP_00030072	>jgi|Dappu1|330579|NCBI_GNO_14400005
>jgi|Dappu1|110198|fgenesh1_pg.C_scaffold_72000065	>jgi|Dappu1|106277|fgenesh1_pg.C_scaffold_41000122	jgi|Dappu1|241662|SNAP_00009720	>jgi|Dappu1|262029|SNAP_00030087	>jgi|Dappu1|260886|SNAP_00028944
>jgi|Dappu1|110200|fgenesh1_pg.C_scaffold_72000067	>jgi|Dappu1|106278|fgenesh1_pg.C_scaffold_41000123	jgi|Dappu1|101866|fgenesh1_pg.C_scaffold_19000060	>jgi|Dappu1|262127|SNAP_00030185	>jgi|Dappu1|115048|fgenesh1_pg.C_scaffold_144000018
>jgi|Dappu1|110202|fgenesh1_pg.C_scaffold_72000069	>jgi|Dappu1|247944|SNAP_00016002	jgi|Dappu1|101871|fgenesh1_pg.C_scaffold_19000065	>jgi|Dappu1|262158|SNAP_00030216	>jgi|Dappu1|63595|e_gw1.144.7.1
>jgi|Dappu1|110204|fgenesh1_pg.C_scaffold_72000071	>jgi|Dappu1|321611|NCBI_GNO_4100166	jgi|Dappu1|302784|PASA_GEN_1900016	>jgi|Dappu1|262197|SNAP_00030255	>jgi|Dappu1|263902|SNAP_00031960
>jgi|Dappu1|110207|fgenesh1_pg.C_scaffold_72000074	>jgi|Dappu1|321612|NCBI_GNO_4100167	jgi|Dappu1|302786|PASA_GEN_1900018	>jgi|Dappu1|262219|SNAP_00030277	>jgi|Dappu1|332676|NCBI_GNO_20100012
>jgi|Dappu1|110211|fgenesh1_pg.C_scaffold_72000078	>jgi|Dappu1|106280|fgenesh1_pg.C_scaffold_41000125	jgi|Dappu1|223957|estExt_fgenesh1_pg.C_190080	>jgi|Dappu1|26234|gw1.18.204.1	>jgi|Dappu1|117245|fgenesh1_pg.C_scaffold_222000016
>jgi|Dappu1|110217|fgenesh1_pg.C_scaffold_72000084	>jgi|Dappu1|247952|SNAP_00016010	jgi|Dappu1|302852|PASA_GEN_1900107	>jgi|Dappu1|262367|SNAP_00030425	>jgi|Dappu1|302674|PASA_GEN_18100007
>jgi|Dappu1|110228|fgenesh1_pg.C_scaffold_72000095	>jgi|Dappu1|225734|estExt_fgenesh1_pg.C_410127	jgi|Dappu1|241679|SNAP_00009737	>jgi|Dappu1|262406|SNAP_00030464	>jgi|Dappu1|333359|NCBI_GNO_23300012
>jgi|Dappu1|110231|fgenesh1_pg.C_scaffold_72000098	>jgi|Dappu1|321618|NCBI_GNO_4100173	jgi|Dappu1|317067|NCBI_GNO_1900064	>jgi|Dappu1|262460|SNAP_00030518	>jgi|Dappu1|333360|NCBI_GNO_23300013
>jgi|Dappu1|110232|fgenesh1_pg.C_scaffold_72000099	>jgi|Dappu1|106287|fgenesh1_pg.C_scaffold_41000132	jgi|Dappu1|317072|NCBI_GNO_1900069	>jgi|Dappu1|262546|SNAP_00030604	>jgi|Dappu1|230026|estExt_fgenesh1_pg.C_20570001
>jgi|Dappu1|110246|fgenesh1_pg.C_scaffold_72000113	>jgi|Dappu1|321621|NCBI_GNO_4100176	jgi|Dappu1|210865|estExt_Genewise1.C_190128	>jgi|Dappu1|262644|SNAP_00030702	>jgi|Dappu1|271320|SNAP_00039378
>jgi|Dappu1|110283|fgenesh1_pg.C_scaffold_72000150	>jgi|Dappu1|321622|NCBI_GNO_4100177	jgi|Dappu1|317080|NCBI_GNO_1900077	>jgi|Dappu1|262658|SNAP_00030716	>jgi|Dappu1|70203|e_gw1.4627.1.1
>jgi|Dappu1|110290|fgenesh1_pg.C_scaffold_72000157	>jgi|Dappu1|333035|NCBI_GNO_21800002	jgi|Dappu1|101922|fgenesh1_pg.C_scaffold_19000116	>jgi|Dappu1|262661|SNAP_00030719	>jgi|Dappu1|264932|SNAP_00032990
>jgi|Dappu1|110292|fgenesh1_pg.C_scaffold_72000159	>jgi|Dappu1|333036|NCBI_GNO_21800003	jgi|Dappu1|317090|NCBI_GNO_1900087	>jgi|Dappu1|262683|SNAP_00030741	>jgi|Dappu1|333408|NCBI_GNO_23500007
>jgi|Dappu1|110302|fgenesh1_pg.C_scaffold_73000010	>jgi|Dappu1|333039|NCBI_GNO_21800006	jgi|Dappu1|101930|fgenesh1_pg.C_scaffold_19000124	>jgi|Dappu1|262743|SNAP_00030801	>jgi|Dappu1|265819|SNAP_00033877
>jgi|Dappu1|110314|fgenesh1_pg.C_scaffold_73000022	>jgi|Dappu1|117134|fgenesh1_pg.C_scaffold_218000004	jgi|Dappu1|101933|fgenesh1_pg.C_scaffold_19000127	>jgi|Dappu1|262744|SNAP_00030802	>jgi|Dappu1|270045|SNAP_00038103
>jgi|Dappu1|110320|fgenesh1_pg.C_scaffold_73000028	>jgi|Dappu1|264475|SNAP_00032533	jgi|Dappu1|241716|SNAP_00009774	>jgi|Dappu1|262799|SNAP_00030857	>jgi|Dappu1|69950|e_gw1.4044.3.1
>jgi|Dappu1|110331|fgenesh1_pg.C_scaffold_73000039	>jgi|Dappu1|229597|estExt_fgenesh1_pg.C_2180009	jgi|Dappu1|223988|estExt_fgenesh1_pg.C_190127	>jgi|Dappu1|262816|SNAP_00030874	>jgi|Dappu1|69953|e_gw1.4046.2.1
>jgi|Dappu1|110333|fgenesh1_pg.C_scaffold_73000041	>jgi|Dappu1|333044|NCBI_GNO_21800011	jgi|Dappu1|241720|SNAP_00009778	>jgi|Dappu1|262863|SNAP_00030921	>jgi|Dappu1|336854|NCBI_GNO_119900003
>jgi|Dappu1|110335|fgenesh1_pg.C_scaffold_73000043	>jgi|Dappu1|264481|SNAP_00032539	jgi|Dappu1|317102|NCBI_GNO_1900100	>jgi|Dappu1|262882|SNAP_00030940	>jgi|Dappu1|336047|NCBI_GNO_83500001
>jgi|Dappu1|110337|fgenesh1_pg.C_scaffold_73000045	>jgi|Dappu1|333048|NCBI_GNO_21800015	jgi|Dappu1|302864|PASA_GEN_1900122	>jgi|Dappu1|262889|SNAP_00030947	>jgi|Dappu1|119605|fgenesh1_pg.C_scaffold_835000002
>jgi|Dappu1|110341|fgenesh1_pg.C_scaffold_73000049	>jgi|Dappu1|251331|SNAP_00019389	jgi|Dappu1|302865|PASA_GEN_1900125	>jgi|Dappu1|262902|SNAP_00030960	>jgi|Dappu1|334482|NCBI_GNO_35000008
>jgi|Dappu1|110345|fgenesh1_pg.C_scaffold_73000053	>jgi|Dappu1|306971|PASA_GEN_5800027	jgi|Dappu1|302806|PASA_GEN_1900044	>jgi|Dappu1|263176|SNAP_00031234	>jgi|Dappu1|70273|e_gw1.4920.3.1
>jgi|Dappu1|110356|fgenesh1_pg.C_scaffold_73000064	>jgi|Dappu1|323919|NCBI_GNO_5800008	jgi|Dappu1|302867|PASA_GEN_1900127	>jgi|Dappu1|263269|SNAP_00031327	>jgi|Dappu1|70136|e_gw1.4381.1.1
>jgi|Dappu1|110377|fgenesh1_pg.C_scaffold_74000015	>jgi|Dappu1|108438|fgenesh1_pg.C_scaffold_58000009	jgi|Dappu1|302868|PASA_GEN_1900128	>jgi|Dappu1|263368|SNAP_00031426	>jgi|Dappu1|9674|gw1.5218.2.1
>jgi|Dappu1|110387|fgenesh1_pg.C_scaffold_74000025	>jgi|Dappu1|251345|SNAP_00019403	jgi|Dappu1|317117|NCBI_GNO_1900115	>jgi|Dappu1|263370|SNAP_00031428	>jgi|Dappu1|271125|SNAP_00039183
>jgi|Dappu1|110389|fgenesh1_pg.C_scaffold_74000027	>jgi|Dappu1|323923|NCBI_GNO_5800012	jgi|Dappu1|101959|fgenesh1_pg.C_scaffold_19000153	>jgi|Dappu1|263371|SNAP_00031429	>jgi|Dappu1|340521|NCBI_GNO_436300001
>jgi|Dappu1|110393|fgenesh1_pg.C_scaffold_74000031	>jgi|Dappu1|251346|SNAP_00019404	jgi|Dappu1|317120|NCBI_GNO_1900118	>jgi|Dappu1|263387|SNAP_00031445	>jgi|Dappu1|9835|gw1.8854.1.1
>jgi|Dappu1|110398|fgenesh1_pg.C_scaffold_74000036	>jgi|Dappu1|323925|NCBI_GNO_5800014	jgi|Dappu1|241744|SNAP_00009802	>jgi|Dappu1|263430|SNAP_00031488	>jgi|Dappu1|229959|estExt_fgenesh1_pg.C_9580001
>jgi|Dappu1|110406|fgenesh1_pg.C_scaffold_74000044	>jgi|Dappu1|108443|fgenesh1_pg.C_scaffold_58000014	jgi|Dappu1|36719|gw1.19.362.1	>jgi|Dappu1|263562|SNAP_00031620	>jgi|Dappu1|117663|fgenesh1_pg.C_scaffold_250000007
>jgi|Dappu1|110425|fgenesh1_pg.C_scaffold_74000063	>jgi|Dappu1|323929|NCBI_GNO_5800018	jgi|Dappu1|101971|fgenesh1_pg.C_scaffold_19000165	>jgi|Dappu1|263601|SNAP_00031659	>jgi|Dappu1|119389|fgenesh1_pg.C_scaffold_710000002
>jgi|Dappu1|110430|fgenesh1_pg.C_scaffold_74000068	>jgi|Dappu1|108452|fgenesh1_pg.C_scaffold_58000023	jgi|Dappu1|241754|SNAP_00009812	>jgi|Dappu1|263774|SNAP_00031832	>jgi|Dappu1|308728|PASA_GEN_84900003
>jgi|Dappu1|110436|fgenesh1_pg.C_scaffold_75000001	>jgi|Dappu1|108453|fgenesh1_pg.C_scaffold_58000024	jgi|Dappu1|317132|NCBI_GNO_1900130	>jgi|Dappu1|263840|SNAP_00031898	>jgi|Dappu1|336082|NCBI_GNO_84900005
>jgi|Dappu1|110449|fgenesh1_pg.C_scaffold_75000014	>jgi|Dappu1|323936|NCBI_GNO_5800025	jgi|Dappu1|49418|e_gw1.19.335.1	>jgi|Dappu1|263916|SNAP_00031974	>jgi|Dappu1|270239|SNAP_00038297
>jgi|Dappu1|110454|fgenesh1_pg.C_scaffold_75000019	>jgi|Dappu1|323937|NCBI_GNO_5800026	jgi|Dappu1|241761|SNAP_00009819	>jgi|Dappu1|263958|SNAP_00032016	>jgi|Dappu1|268479|SNAP_00036537
>jgi|Dappu1|110456|fgenesh1_pg.C_scaffold_75000021	>jgi|Dappu1|251366|SNAP_00019424	jgi|Dappu1|317144|NCBI_GNO_1900142	>jgi|Dappu1|263966|SNAP_00032024	>jgi|Dappu1|335484|NCBI_GNO_64300007
>jgi|Dappu1|110469|fgenesh1_pg.C_scaffold_75000034	>jgi|Dappu1|251367|SNAP_00019425	jgi|Dappu1|101991|fgenesh1_pg.C_scaffold_19000185	>jgi|Dappu1|263967|SNAP_00032025	>jgi|Dappu1|268482|SNAP_00036540
>jgi|Dappu1|110472|fgenesh1_pg.C_scaffold_75000037	>jgi|Dappu1|323940|NCBI_GNO_5800029	jgi|Dappu1|241770|SNAP_00009828	>jgi|Dappu1|264012|SNAP_00032070	>jgi|Dappu1|119700|fgenesh1_pg.C_scaffold_887000003
>jgi|Dappu1|110473|fgenesh1_pg.C_scaffold_75000038	>jgi|Dappu1|251371|SNAP_00019429	jgi|Dappu1|302820|PASA_GEN_1900063	>jgi|Dappu1|264015|SNAP_00032073	>jgi|Dappu1|307409|PASA_GEN_62700002
>jgi|Dappu1|110480|fgenesh1_pg.C_scaffold_75000045	>jgi|Dappu1|108459|fgenesh1_pg.C_scaffold_58000030	jgi|Dappu1|302821|PASA_GEN_1900064	>jgi|Dappu1|264127|SNAP_00032185	>jgi|Dappu1|267764|SNAP_00035822
>jgi|Dappu1|110500|fgenesh1_pg.C_scaffold_75000065	>jgi|Dappu1|251375|SNAP_00019433	jgi|Dappu1|317161|NCBI_GNO_1900160	>jgi|Dappu1|264166|SNAP_00032224	>jgi|Dappu1|17207|gw1.1296.2.1
>jgi|Dappu1|110517|fgenesh1_pg.C_scaffold_75000082	>jgi|Dappu1|323946|NCBI_GNO_5800035	jgi|Dappu1|241795|SNAP_00009853	>jgi|Dappu1|264170|SNAP_00032228	>jgi|Dappu1|231915|estExt_fgenesh1_kg.C_4220001
>jgi|Dappu1|110519|fgenesh1_pg.C_scaffold_75000084	>jgi|Dappu1|306976|PASA_GEN_5800032	jgi|Dappu1|241796|SNAP_00009854	>jgi|Dappu1|264176|SNAP_00032234	>jgi|Dappu1|334837|NCBI_GNO_42200003
>jgi|Dappu1|110566|fgenesh1_pg.C_scaffold_76000010	>jgi|Dappu1|323953|NCBI_GNO_5800042	jgi|Dappu1|302885|PASA_GEN_1900152	>jgi|Dappu1|264304|SNAP_00032362	>jgi|Dappu1|301256|PASA_GEN_126600002
>jgi|Dappu1|110581|fgenesh1_pg.C_scaffold_76000025	>jgi|Dappu1|323957|NCBI_GNO_5800046	jgi|Dappu1|317164|NCBI_GNO_1900163	>jgi|Dappu1|264306|SNAP_00032364	>jgi|Dappu1|63400|e_gw1.140.7.1
>jgi|Dappu1|110605|fgenesh1_pg.C_scaffold_76000049	>jgi|Dappu1|306953|PASA_GEN_5800005	jgi|Dappu1|102025|fgenesh1_pg.C_scaffold_19000219	>jgi|Dappu1|264307|SNAP_00032365	>jgi|Dappu1|337236|NCBI_GNO_143300002
>jgi|Dappu1|110675|fgenesh1_pg.C_scaffold_77000004	>jgi|Dappu1|108476|fgenesh1_pg.C_scaffold_58000047	jgi|Dappu1|241808|SNAP_00009866	>jgi|Dappu1|26434|gw1.40.138.1	>jgi|Dappu1|118332|fgenesh1_pg.C_scaffold_337000001
>jgi|Dappu1|110679|fgenesh1_pg.C_scaffold_77000008	>jgi|Dappu1|108478|fgenesh1_pg.C_scaffold_58000049	jgi|Dappu1|317175|NCBI_GNO_1900174	>jgi|Dappu1|264358|SNAP_00032416	>jgi|Dappu1|118339|fgenesh1_pg.C_scaffold_337000008
>jgi|Dappu1|110680|fgenesh1_pg.C_scaffold_77000009	>jgi|Dappu1|251396|SNAP_00019454	jgi|Dappu1|241817|SNAP_00009875	>jgi|Dappu1|264368|SNAP_00032426	>jgi|Dappu1|334021|NCBI_GNO_29000007
>jgi|Dappu1|110692|fgenesh1_pg.C_scaffold_77000021	>jgi|Dappu1|56646|e_gw1.58.35.1	jgi|Dappu1|102041|fgenesh1_pg.C_scaffold_19000235	>jgi|Dappu1|264373|SNAP_00032431	>jgi|Dappu1|115790|fgenesh1_pg.C_scaffold_165000011
>jgi|Dappu1|110694|fgenesh1_pg.C_scaffold_77000023	>jgi|Dappu1|323972|NCBI_GNO_5800061	jgi|Dappu1|102042|fgenesh1_pg.C_scaffold_19000236	>jgi|Dappu1|264381|SNAP_00032439	>jgi|Dappu1|115793|fgenesh1_pg.C_scaffold_165000014
>jgi|Dappu1|110702|fgenesh1_pg.C_scaffold_77000031	>jgi|Dappu1|108490|fgenesh1_pg.C_scaffold_58000061	jgi|Dappu1|102043|fgenesh1_pg.C_scaffold_19000237	>jgi|Dappu1|264414|SNAP_00032472	>jgi|Dappu1|331468|NCBI_GNO_16500033
>jgi|Dappu1|110739|fgenesh1_pg.C_scaffold_77000068	>jgi|Dappu1|251401|SNAP_00019459	jgi|Dappu1|241823|SNAP_00009881	>jgi|Dappu1|264419|SNAP_00032477	>jgi|Dappu1|18207|gw1.1548.2.1
>jgi|Dappu1|110747|fgenesh1_pg.C_scaffold_77000076	>jgi|Dappu1|323979|NCBI_GNO_5800068	jgi|Dappu1|241824|SNAP_00009882	>jgi|Dappu1|26442|gw1.50.62.1	>jgi|Dappu1|333208|NCBI_GNO_22500011
>jgi|Dappu1|110771|fgenesh1_pg.C_scaffold_77000100	>jgi|Dappu1|108507|fgenesh1_pg.C_scaffold_58000078	jgi|Dappu1|317181|NCBI_GNO_1900180	>jgi|Dappu1|264435|SNAP_00032493	>jgi|Dappu1|65504|e_gw1.225.20.1
>jgi|Dappu1|110772|fgenesh1_pg.C_scaffold_77000101	>jgi|Dappu1|251412|SNAP_00019470	jgi|Dappu1|241827|SNAP_00009885	>jgi|Dappu1|264519|SNAP_00032577	>jgi|Dappu1|270563|SNAP_00038621
>jgi|Dappu1|110773|fgenesh1_pg.C_scaffold_77000102	>jgi|Dappu1|56655|e_gw1.58.30.1	jgi|Dappu1|308914|PASA_GEN_8900005	>jgi|Dappu1|264527|SNAP_00032585	>jgi|Dappu1|334449|NCBI_GNO_34700004
>jgi|Dappu1|110774|fgenesh1_pg.C_scaffold_77000103	>jgi|Dappu1|323997|NCBI_GNO_5800086	jgi|Dappu1|255869|SNAP_00023927	>jgi|Dappu1|264571|SNAP_00032629	>jgi|Dappu1|118393|fgenesh1_pg.C_scaffold_347000009
>jgi|Dappu1|110778|fgenesh1_pg.C_scaffold_77000107	>jgi|Dappu1|323998|NCBI_GNO_5800087	jgi|Dappu1|255875|SNAP_00023933	>jgi|Dappu1|264648|SNAP_00032706	>jgi|Dappu1|334468|NCBI_GNO_34700023
>jgi|Dappu1|110779|fgenesh1_pg.C_scaffold_77000108	>jgi|Dappu1|251423|SNAP_00019481	jgi|Dappu1|255877|SNAP_00023935	>jgi|Dappu1|264666|SNAP_00032724	>jgi|Dappu1|270361|SNAP_00038419
>jgi|Dappu1|110783|fgenesh1_pg.C_scaffold_78000003	>jgi|Dappu1|306989|PASA_GEN_5800046	jgi|Dappu1|255880|SNAP_00023938	>jgi|Dappu1|264699|SNAP_00032757	>jgi|Dappu1|70049|e_gw1.4179.2.1
>jgi|Dappu1|110786|fgenesh1_pg.C_scaffold_78000006	>jgi|Dappu1|108524|fgenesh1_pg.C_scaffold_58000095	jgi|Dappu1|308917|PASA_GEN_8900008	>jgi|Dappu1|264708|SNAP_00032766	>jgi|Dappu1|333643|NCBI_GNO_25100002
>jgi|Dappu1|110812|fgenesh1_pg.C_scaffold_78000032	>jgi|Dappu1|108525|fgenesh1_pg.C_scaffold_58000096	jgi|Dappu1|111848|fgenesh1_pg.C_scaffold_89000011	>jgi|Dappu1|264716|SNAP_00032774	>jgi|Dappu1|334492|NCBI_GNO_35100003
>jgi|Dappu1|110829|fgenesh1_pg.C_scaffold_78000049	>jgi|Dappu1|251434|SNAP_00019492	jgi|Dappu1|308920|PASA_GEN_8900012	>jgi|Dappu1|264745|SNAP_00032803	>jgi|Dappu1|117034|fgenesh1_pg.C_scaffold_212000009
>jgi|Dappu1|110832|fgenesh1_pg.C_scaffold_78000052	>jgi|Dappu1|108529|fgenesh1_pg.C_scaffold_58000100	jgi|Dappu1|255895|SNAP_00023953	>jgi|Dappu1|264746|SNAP_00032804	>jgi|Dappu1|69782|e_gw1.3759.4.1
>jgi|Dappu1|110835|fgenesh1_pg.C_scaffold_78000055	>jgi|Dappu1|108530|fgenesh1_pg.C_scaffold_58000101	jgi|Dappu1|255900|SNAP_00023958	>jgi|Dappu1|264771|SNAP_00032829	>jgi|Dappu1|120017|fgenesh1_pg.C_scaffold_1102000001
>jgi|Dappu1|110836|fgenesh1_pg.C_scaffold_78000056	>jgi|Dappu1|306993|PASA_GEN_5800050	jgi|Dappu1|111869|fgenesh1_pg.C_scaffold_89000032	>jgi|Dappu1|264778|SNAP_00032836	>jgi|Dappu1|274183|SNAP_00042241
>jgi|Dappu1|110837|fgenesh1_pg.C_scaffold_78000057	>jgi|Dappu1|251460|SNAP_00019518	jgi|Dappu1|308942|PASA_GEN_8900036	>jgi|Dappu1|264813|SNAP_00032871	>jgi|Dappu1|122852|fgenesh1_pg.C_scaffold_5777000001
>jgi|Dappu1|110844|fgenesh1_pg.C_scaffold_78000064	>jgi|Dappu1|324028|NCBI_GNO_5800117	jgi|Dappu1|255915|SNAP_00023973	>jgi|Dappu1|264851|SNAP_00032909	>jgi|Dappu1|120489|fgenesh1_pg.C_scaffold_1507000002
>jgi|Dappu1|110846|fgenesh1_pg.C_scaffold_78000066	>jgi|Dappu1|251466|SNAP_00019524	jgi|Dappu1|255921|SNAP_00023979	>jgi|Dappu1|264853|SNAP_00032911	>jgi|Dappu1|268668|SNAP_00036726
>jgi|Dappu1|110847|fgenesh1_pg.C_scaffold_78000067	>jgi|Dappu1|251467|SNAP_00019525	jgi|Dappu1|111874|fgenesh1_pg.C_scaffold_89000037	>jgi|Dappu1|264893|SNAP_00032951	>jgi|Dappu1|270546|SNAP_00038604
>jgi|Dappu1|110848|fgenesh1_pg.C_scaffold_78000068	>jgi|Dappu1|226564|estExt_fgenesh1_pg.C_580121	jgi|Dappu1|255925|SNAP_00023983	>jgi|Dappu1|264894|SNAP_00032952	>jgi|Dappu1|117997|fgenesh1_pg.C_scaffold_286000005
>jgi|Dappu1|110849|fgenesh1_pg.C_scaffold_78000069	>jgi|Dappu1|251474|SNAP_00019532	jgi|Dappu1|255931|SNAP_00023989	>jgi|Dappu1|264901|SNAP_00032959	>jgi|Dappu1|66487|e_gw1.371.2.1
>jgi|Dappu1|110853|fgenesh1_pg.C_scaffold_78000073	>jgi|Dappu1|251475|SNAP_00019533	jgi|Dappu1|255932|SNAP_00023990	>jgi|Dappu1|265000|SNAP_00033058	>jgi|Dappu1|272455|SNAP_00040513
>jgi|Dappu1|110854|fgenesh1_pg.C_scaffold_78000074	>jgi|Dappu1|104122|fgenesh1_pg.C_scaffold_29000001	jgi|Dappu1|255940|SNAP_00023998	>jgi|Dappu1|265003|SNAP_00033061	>jgi|Dappu1|18736|gw1.2532.1.1
>jgi|Dappu1|110857|fgenesh1_pg.C_scaffold_78000077	>jgi|Dappu1|304464|PASA_GEN_2900064	jgi|Dappu1|111884|fgenesh1_pg.C_scaffold_89000047	>jgi|Dappu1|265069|SNAP_00033127	>jgi|Dappu1|70299|e_gw1.5056.1.1
>jgi|Dappu1|110860|fgenesh1_pg.C_scaffold_78000080	>jgi|Dappu1|244605|SNAP_00012663	jgi|Dappu1|308928|PASA_GEN_8900022	>jgi|Dappu1|265116|SNAP_00033174	>jgi|Dappu1|334507|NCBI_GNO_35300005
>jgi|Dappu1|110861|fgenesh1_pg.C_scaffold_78000081	>jgi|Dappu1|5603|gw1.29.58.1	jgi|Dappu1|327313|NCBI_GNO_8900044	>jgi|Dappu1|265163|SNAP_00033221	>jgi|Dappu1|67166|e_gw1.676.3.1
>jgi|Dappu1|110862|fgenesh1_pg.C_scaffold_78000082	>jgi|Dappu1|244609|SNAP_00012667	jgi|Dappu1|327316|NCBI_GNO_8900048	>jgi|Dappu1|265168|SNAP_00033226	>jgi|Dappu1|122500|fgenesh1_pg.C_scaffold_4425000001
>jgi|Dappu1|110864|fgenesh1_pg.C_scaffold_78000084	>jgi|Dappu1|244611|SNAP_00012669	jgi|Dappu1|308947|PASA_GEN_8900043	>jgi|Dappu1|265197|SNAP_00033255	>jgi|Dappu1|19757|gw1.12964.1.1
>jgi|Dappu1|110865|fgenesh1_pg.C_scaffold_78000085	>jgi|Dappu1|304419|PASA_GEN_2900011	jgi|Dappu1|255953|SNAP_00024011	>jgi|Dappu1|265198|SNAP_00033256	>jgi|Dappu1|274054|SNAP_00042112
>jgi|Dappu1|110867|fgenesh1_pg.C_scaffold_78000087	>jgi|Dappu1|319323|NCBI_GNO_2900022	jgi|Dappu1|255954|SNAP_00024012	>jgi|Dappu1|265255|SNAP_00033313	>jgi|Dappu1|273688|SNAP_00041746
>jgi|Dappu1|110875|fgenesh1_pg.C_scaffold_78000095	>jgi|Dappu1|104146|fgenesh1_pg.C_scaffold_29000025	jgi|Dappu1|111894|fgenesh1_pg.C_scaffold_89000057	>jgi|Dappu1|265266|SNAP_00033324	>jgi|Dappu1|273689|SNAP_00041747
>jgi|Dappu1|110876|fgenesh1_pg.C_scaffold_78000096	>jgi|Dappu1|319328|NCBI_GNO_2900027	jgi|Dappu1|327323|NCBI_GNO_8900055	>jgi|Dappu1|265352|SNAP_00033410	>jgi|Dappu1|70036|e_gw1.4170.1.1
>jgi|Dappu1|110877|fgenesh1_pg.C_scaffold_78000097	>jgi|Dappu1|304469|PASA_GEN_2900069	jgi|Dappu1|111901|fgenesh1_pg.C_scaffold_89000064	>jgi|Dappu1|265488|SNAP_00033546	>jgi|Dappu1|71528|e_gw1.8281.3.1
>jgi|Dappu1|110879|fgenesh1_pg.C_scaffold_78000099	>jgi|Dappu1|104153|fgenesh1_pg.C_scaffold_29000032	jgi|Dappu1|111902|fgenesh1_pg.C_scaffold_89000065	>jgi|Dappu1|265509|SNAP_00033567	>jgi|Dappu1|70008|e_gw1.4124.1.1
>jgi|Dappu1|110880|fgenesh1_pg.C_scaffold_78000100	>jgi|Dappu1|104156|fgenesh1_pg.C_scaffold_29000035	jgi|Dappu1|308952|PASA_GEN_8900048	>jgi|Dappu1|265522|SNAP_00033580	>jgi|Dappu1|274250|SNAP_00042308
>jgi|Dappu1|110881|fgenesh1_pg.C_scaffold_78000101	>jgi|Dappu1|319334|NCBI_GNO_2900033	jgi|Dappu1|308930|PASA_GEN_8900024	>jgi|Dappu1|265556|SNAP_00033614	>jgi|Dappu1|280346|SNAP_00048404
>jgi|Dappu1|110884|fgenesh1_pg.C_scaffold_78000104	>jgi|Dappu1|319335|NCBI_GNO_2900034	jgi|Dappu1|111912|fgenesh1_pg.C_scaffold_89000075	>jgi|Dappu1|265595|SNAP_00033653	>jgi|Dappu1|72676|e_gw1.12282.2.1
>jgi|Dappu1|110885|fgenesh1_pg.C_scaffold_78000105	>jgi|Dappu1|244644|SNAP_00012702	jgi|Dappu1|255985|SNAP_00024043	>jgi|Dappu1|265628|SNAP_00033686	>jgi|Dappu1|279198|SNAP_00047256
>jgi|Dappu1|110887|fgenesh1_pg.C_scaffold_78000107	>jgi|Dappu1|244645|SNAP_00012703	jgi|Dappu1|247689|SNAP_00015747	>jgi|Dappu1|265753|SNAP_00033811	>jgi|Dappu1|72824|e_gw1.12684.1.1
>jgi|Dappu1|110892|fgenesh1_pg.C_scaffold_79000005	>jgi|Dappu1|225009|estExt_fgenesh1_pg.C_290045	jgi|Dappu1|225708|estExt_fgenesh1_pg.C_410003	>jgi|Dappu1|265823|SNAP_00033881	>jgi|Dappu1|29950|gw1.10287.1.1
>jgi|Dappu1|110904|fgenesh1_pg.C_scaffold_79000017	>jgi|Dappu1|104167|fgenesh1_pg.C_scaffold_29000046	jgi|Dappu1|305825|PASA_GEN_4100001	>jgi|Dappu1|265826|SNAP_00033884	>jgi|Dappu1|331850|NCBI_GNO_17500007
>jgi|Dappu1|110907|fgenesh1_pg.C_scaffold_79000020	>jgi|Dappu1|104168|fgenesh1_pg.C_scaffold_29000047	jgi|Dappu1|106161|fgenesh1_pg.C_scaffold_41000006	>jgi|Dappu1|265972|SNAP_00034030	>jgi|Dappu1|116135|fgenesh1_pg.C_scaffold_175000018
>jgi|Dappu1|110913|fgenesh1_pg.C_scaffold_79000026	>jgi|Dappu1|104169|fgenesh1_pg.C_scaffold_29000048	jgi|Dappu1|106162|fgenesh1_pg.C_scaffold_41000007	>jgi|Dappu1|265974|SNAP_00034032	>jgi|Dappu1|119461|fgenesh1_pg.C_scaffold_762000003
>jgi|Dappu1|110924|fgenesh1_pg.C_scaffold_79000037	>jgi|Dappu1|319350|NCBI_GNO_2900049	jgi|Dappu1|247705|SNAP_00015763	>jgi|Dappu1|266045|SNAP_00034103	>jgi|Dappu1|335855|NCBI_GNO_76200008
>jgi|Dappu1|110932|fgenesh1_pg.C_scaffold_79000045	>jgi|Dappu1|304473|PASA_GEN_2900074	jgi|Dappu1|247707|SNAP_00015765	>jgi|Dappu1|266109|SNAP_00034167	>jgi|Dappu1|68580|e_gw1.1917.4.1
>jgi|Dappu1|110954|fgenesh1_pg.C_scaffold_79000067	>jgi|Dappu1|104176|fgenesh1_pg.C_scaffold_29000055	jgi|Dappu1|106165|fgenesh1_pg.C_scaffold_41000010	>jgi|Dappu1|266158|SNAP_00034216	>jgi|Dappu1|340210|NCBI_GNO_403900002
>jgi|Dappu1|110962|fgenesh1_pg.C_scaffold_79000075	>jgi|Dappu1|104185|fgenesh1_pg.C_scaffold_29000064	jgi|Dappu1|321453|NCBI_GNO_4100008	>jgi|Dappu1|266172|SNAP_00034230	>jgi|Dappu1|38805|gw1.7518.1.1
>jgi|Dappu1|110963|fgenesh1_pg.C_scaffold_79000076	>jgi|Dappu1|304477|PASA_GEN_2900080	jgi|Dappu1|106167|fgenesh1_pg.C_scaffold_41000012	>jgi|Dappu1|266278|SNAP_00034336	>jgi|Dappu1|263649|SNAP_00031707
>jgi|Dappu1|110964|fgenesh1_pg.C_scaffold_79000077	>jgi|Dappu1|104187|fgenesh1_pg.C_scaffold_29000066	jgi|Dappu1|321456|NCBI_GNO_4100011	>jgi|Dappu1|266328|SNAP_00034386	>jgi|Dappu1|117742|fgenesh1_pg.C_scaffold_258000008
>jgi|Dappu1|110965|fgenesh1_pg.C_scaffold_79000078	>jgi|Dappu1|244673|SNAP_00012731	jgi|Dappu1|106171|fgenesh1_pg.C_scaffold_41000016	>jgi|Dappu1|266349|SNAP_00034407	>jgi|Dappu1|334395|NCBI_GNO_33900003
>jgi|Dappu1|110966|fgenesh1_pg.C_scaffold_79000079	>jgi|Dappu1|244677|SNAP_00012735	jgi|Dappu1|247718|SNAP_00015776	>jgi|Dappu1|266424|SNAP_00034482	>jgi|Dappu1|336202|NCBI_GNO_89600001
>jgi|Dappu1|110979|fgenesh1_pg.C_scaffold_79000092	>jgi|Dappu1|104191|fgenesh1_pg.C_scaffold_29000070	jgi|Dappu1|247721|SNAP_00015779	>jgi|Dappu1|266504|SNAP_00034562	>jgi|Dappu1|67661|e_gw1.959.1.1
>jgi|Dappu1|110980|fgenesh1_pg.C_scaffold_79000093	>jgi|Dappu1|244679|SNAP_00012737	jgi|Dappu1|247723|SNAP_00015781	>jgi|Dappu1|266572|SNAP_00034630	>jgi|Dappu1|67864|e_gw1.1125.1.1
>jgi|Dappu1|110982|fgenesh1_pg.C_scaffold_79000095	>jgi|Dappu1|319375|NCBI_GNO_2900074	jgi|Dappu1|247725|SNAP_00015783	>jgi|Dappu1|266578|SNAP_00034636	>jgi|Dappu1|123357|fgenesh1_pg.C_scaffold_6655000001
>jgi|Dappu1|111053|fgenesh1_pg.C_scaffold_80000054	>jgi|Dappu1|244689|SNAP_00012747	jgi|Dappu1|106172|fgenesh1_pg.C_scaffold_41000017	>jgi|Dappu1|266599|SNAP_00034657	>jgi|Dappu1|343418|NCBI_GNO_1036400001
>jgi|Dappu1|111056|fgenesh1_pg.C_scaffold_80000057	>jgi|Dappu1|104203|fgenesh1_pg.C_scaffold_29000082	jgi|Dappu1|247728|SNAP_00015786	>jgi|Dappu1|266611|SNAP_00034669	>jgi|Dappu1|73242|e_gw1.14291.3.1
>jgi|Dappu1|111058|fgenesh1_pg.C_scaffold_80000059	>jgi|Dappu1|304479|PASA_GEN_2900082	jgi|Dappu1|247729|SNAP_00015787	>jgi|Dappu1|266628|SNAP_00034686	>jgi|Dappu1|115269|fgenesh1_pg.C_scaffold_150000004
>jgi|Dappu1|111059|fgenesh1_pg.C_scaffold_80000060	>jgi|Dappu1|225020|estExt_fgenesh1_pg.C_290084	jgi|Dappu1|247730|SNAP_00015788	>jgi|Dappu1|266634|SNAP_00034692	>jgi|Dappu1|265214|SNAP_00033272
>jgi|Dappu1|111069|fgenesh1_pg.C_scaffold_80000070	>jgi|Dappu1|244701|SNAP_00012759	jgi|Dappu1|321466|NCBI_GNO_4100021	>jgi|Dappu1|266635|SNAP_00034693	>jgi|Dappu1|117644|fgenesh1_pg.C_scaffold_249000001
>jgi|Dappu1|111091|fgenesh1_pg.C_scaffold_80000092	>jgi|Dappu1|244702|SNAP_00012760	jgi|Dappu1|106175|fgenesh1_pg.C_scaffold_41000020	>jgi|Dappu1|266638|SNAP_00034696	>jgi|Dappu1|117753|fgenesh1_pg.C_scaffold_260000007
>jgi|Dappu1|111092|fgenesh1_pg.C_scaffold_80000093	>jgi|Dappu1|304485|PASA_GEN_2900088	jgi|Dappu1|247738|SNAP_00015796	>jgi|Dappu1|266641|SNAP_00034699	>jgi|Dappu1|334547|NCBI_GNO_35900008
>jgi|Dappu1|111093|fgenesh1_pg.C_scaffold_80000094	>jgi|Dappu1|319395|NCBI_GNO_2900094	jgi|Dappu1|247759|SNAP_00015817	>jgi|Dappu1|266643|SNAP_00034701	>jgi|Dappu1|334565|NCBI_GNO_36300001
>jgi|Dappu1|111094|fgenesh1_pg.C_scaffold_80000095	>jgi|Dappu1|244709|SNAP_00012767	jgi|Dappu1|321481|NCBI_GNO_4100036	>jgi|Dappu1|266680|SNAP_00034738	>jgi|Dappu1|266998|SNAP_00035056
>jgi|Dappu1|111096|fgenesh1_pg.C_scaffold_80000097	>jgi|Dappu1|319400|NCBI_GNO_2900099	jgi|Dappu1|247763|SNAP_00015821	>jgi|Dappu1|26678|gw1.30.192.1	>jgi|Dappu1|267127|SNAP_00035185
>jgi|Dappu1|111100|fgenesh1_pg.C_scaffold_80000101	>jgi|Dappu1|319401|NCBI_GNO_2900100	jgi|Dappu1|247764|SNAP_00015822	>jgi|Dappu1|266815|SNAP_00034873	>jgi|Dappu1|118640|fgenesh1_pg.C_scaffold_394000001
>jgi|Dappu1|111101|fgenesh1_pg.C_scaffold_80000102	>jgi|Dappu1|244713|SNAP_00012771	jgi|Dappu1|247766|SNAP_00015824	>jgi|Dappu1|26684|gw1.34.89.1	>jgi|Dappu1|334729|NCBI_GNO_39400002
>jgi|Dappu1|111102|fgenesh1_pg.C_scaffold_81000001	>jgi|Dappu1|244714|SNAP_00012772	jgi|Dappu1|247768|SNAP_00015826	>jgi|Dappu1|266896|SNAP_00034954	>jgi|Dappu1|334818|NCBI_GNO_41600001
>jgi|Dappu1|111104|fgenesh1_pg.C_scaffold_81000003	>jgi|Dappu1|244715|SNAP_00012773	jgi|Dappu1|321488|NCBI_GNO_4100043	>jgi|Dappu1|266923|SNAP_00034981	>jgi|Dappu1|335013|NCBI_GNO_47500004
>jgi|Dappu1|111110|fgenesh1_pg.C_scaffold_81000009	>jgi|Dappu1|244717|SNAP_00012775	jgi|Dappu1|106191|fgenesh1_pg.C_scaffold_41000036	>jgi|Dappu1|266927|SNAP_00034985	>jgi|Dappu1|118887|fgenesh1_pg.C_scaffold_483000003
>jgi|Dappu1|111113|fgenesh1_pg.C_scaffold_81000012	>jgi|Dappu1|244725|SNAP_00012783	jgi|Dappu1|247774|SNAP_00015832	>jgi|Dappu1|266928|SNAP_00034986	>jgi|Dappu1|118892|fgenesh1_pg.C_scaffold_484000003
>jgi|Dappu1|111119|fgenesh1_pg.C_scaffold_81000018	>jgi|Dappu1|244729|SNAP_00012787	jgi|Dappu1|321492|NCBI_GNO_4100047	>jgi|Dappu1|266929|SNAP_00034987	>jgi|Dappu1|335173|NCBI_GNO_52900004
>jgi|Dappu1|111128|fgenesh1_pg.C_scaffold_81000027	>jgi|Dappu1|319423|NCBI_GNO_2900122	jgi|Dappu1|247777|SNAP_00015835	>jgi|Dappu1|266968|SNAP_00035026	>jgi|Dappu1|268063|SNAP_00036121
>jgi|Dappu1|111133|fgenesh1_pg.C_scaffold_81000032	>jgi|Dappu1|212447|estExt_Genewise1.C_290148	jgi|Dappu1|106195|fgenesh1_pg.C_scaffold_41000040	>jgi|Dappu1|267070|SNAP_00035128	>jgi|Dappu1|119038|fgenesh1_pg.C_scaffold_574000006
>jgi|Dappu1|111136|fgenesh1_pg.C_scaffold_81000035	>jgi|Dappu1|225033|estExt_fgenesh1_pg.C_290125	jgi|Dappu1|321500|NCBI_GNO_4100055	>jgi|Dappu1|267118|SNAP_00035176	>jgi|Dappu1|335267|NCBI_GNO_57800005
>jgi|Dappu1|111143|fgenesh1_pg.C_scaffold_81000042	>jgi|Dappu1|244743|SNAP_00012801	jgi|Dappu1|247787|SNAP_00015845	>jgi|Dappu1|267131|SNAP_00035189	>jgi|Dappu1|119056|fgenesh1_pg.C_scaffold_578000005
>jgi|Dappu1|111146|fgenesh1_pg.C_scaffold_81000045	>jgi|Dappu1|304436|PASA_GEN_2900029	jgi|Dappu1|247789|SNAP_00015847	>jgi|Dappu1|267152|SNAP_00035210	>jgi|Dappu1|335271|NCBI_GNO_57800009
>jgi|Dappu1|111147|fgenesh1_pg.C_scaffold_81000046	>jgi|Dappu1|304496|PASA_GEN_2900102	jgi|Dappu1|247793|SNAP_00015851	>jgi|Dappu1|267210|SNAP_00035268	>jgi|Dappu1|335289|NCBI_GNO_58400007
>jgi|Dappu1|111149|fgenesh1_pg.C_scaffold_81000048	>jgi|Dappu1|244749|SNAP_00012807	jgi|Dappu1|247794|SNAP_00015852	>jgi|Dappu1|267252|SNAP_00035310	>jgi|Dappu1|335424|NCBI_GNO_62500002
>jgi|Dappu1|111150|fgenesh1_pg.C_scaffold_81000049	>jgi|Dappu1|244750|SNAP_00012808	jgi|Dappu1|106201|fgenesh1_pg.C_scaffold_41000046	>jgi|Dappu1|267284|SNAP_00035342	>jgi|Dappu1|119367|fgenesh1_pg.C_scaffold_701000002
>jgi|Dappu1|111161|fgenesh1_pg.C_scaffold_81000060	>jgi|Dappu1|244751|SNAP_00012809	jgi|Dappu1|106202|fgenesh1_pg.C_scaffold_41000047	>jgi|Dappu1|267285|SNAP_00035343	>jgi|Dappu1|119420|fgenesh1_pg.C_scaffold_733000001
>jgi|Dappu1|111162|fgenesh1_pg.C_scaffold_81000061	>jgi|Dappu1|244754|SNAP_00012812	jgi|Dappu1|106203|fgenesh1_pg.C_scaffold_41000048	>jgi|Dappu1|267292|SNAP_00035350	>jgi|Dappu1|335960|NCBI_GNO_79900004
>jgi|Dappu1|111163|fgenesh1_pg.C_scaffold_81000062	>jgi|Dappu1|304498|PASA_GEN_2900104	jgi|Dappu1|321514|NCBI_GNO_4100069	>jgi|Dappu1|26734|gw1.49.67.1	>jgi|Dappu1|269103|SNAP_00037161
>jgi|Dappu1|111164|fgenesh1_pg.C_scaffold_81000063	>jgi|Dappu1|244756|SNAP_00012814	jgi|Dappu1|225719|estExt_fgenesh1_pg.C_410053	>jgi|Dappu1|267351|SNAP_00035409	>jgi|Dappu1|336006|NCBI_GNO_81700003
>jgi|Dappu1|111167|fgenesh1_pg.C_scaffold_81000066	>jgi|Dappu1|304438|PASA_GEN_2900031	jgi|Dappu1|106209|fgenesh1_pg.C_scaffold_41000054	>jgi|Dappu1|267392|SNAP_00035450	>jgi|Dappu1|336039|NCBI_GNO_83300001
>jgi|Dappu1|111169|fgenesh1_pg.C_scaffold_82000001	>jgi|Dappu1|104263|fgenesh1_pg.C_scaffold_29000142	jgi|Dappu1|247805|SNAP_00015863	>jgi|Dappu1|267400|SNAP_00035458	>jgi|Dappu1|308753|PASA_GEN_85500001
>jgi|Dappu1|111170|fgenesh1_pg.C_scaffold_82000002	>jgi|Dappu1|104265|fgenesh1_pg.C_scaffold_29000144	jgi|Dappu1|305831|PASA_GEN_4100007	>jgi|Dappu1|267420|SNAP_00035478	>jgi|Dappu1|336129|NCBI_GNO_86800001
>jgi|Dappu1|111174|fgenesh1_pg.C_scaffold_82000006	>jgi|Dappu1|244766|SNAP_00012824	jgi|Dappu1|106217|fgenesh1_pg.C_scaffold_41000062	>jgi|Dappu1|267459|SNAP_00035517	>jgi|Dappu1|336152|NCBI_GNO_87700004
>jgi|Dappu1|111176|fgenesh1_pg.C_scaffold_82000008	>jgi|Dappu1|319453|NCBI_GNO_2900152	jgi|Dappu1|106218|fgenesh1_pg.C_scaffold_41000063	>jgi|Dappu1|267531|SNAP_00035589	>jgi|Dappu1|119753|fgenesh1_pg.C_scaffold_920000003
>jgi|Dappu1|111178|fgenesh1_pg.C_scaffold_82000010	>jgi|Dappu1|304446|PASA_GEN_2900042	jgi|Dappu1|247812|SNAP_00015870	>jgi|Dappu1|267532|SNAP_00035590	>jgi|Dappu1|269577|SNAP_00037635
>jgi|Dappu1|111182|fgenesh1_pg.C_scaffold_82000014	>jgi|Dappu1|52309|e_gw1.29.313.1	jgi|Dappu1|321529|NCBI_GNO_4100084	>jgi|Dappu1|267643|SNAP_00035701	>jgi|Dappu1|309423|PASA_GEN_98700001
>jgi|Dappu1|111184|fgenesh1_pg.C_scaffold_82000016	>jgi|Dappu1|304503|PASA_GEN_2900112	jgi|Dappu1|321530|NCBI_GNO_4100085	>jgi|Dappu1|267711|SNAP_00035769	>jgi|Dappu1|269697|SNAP_00037755
>jgi|Dappu1|111185|fgenesh1_pg.C_scaffold_82000017	>jgi|Dappu1|244780|SNAP_00012838	jgi|Dappu1|321531|NCBI_GNO_4100086	>jgi|Dappu1|267853|SNAP_00035911	>jgi|Dappu1|336467|NCBI_GNO_102400001
>jgi|Dappu1|111186|fgenesh1_pg.C_scaffold_82000018	>jgi|Dappu1|304504|PASA_GEN_2900114	jgi|Dappu1|321532|NCBI_GNO_4100087	>jgi|Dappu1|267921|SNAP_00035979	>jgi|Dappu1|300611|PASA_GEN_104100001
>jgi|Dappu1|111188|fgenesh1_pg.C_scaffold_82000020	>jgi|Dappu1|319466|NCBI_GNO_2900165	jgi|Dappu1|106222|fgenesh1_pg.C_scaffold_41000067	>jgi|Dappu1|267924|SNAP_00035982	>jgi|Dappu1|300612|PASA_GEN_104100002
>jgi|Dappu1|111189|fgenesh1_pg.C_scaffold_82000021	>jgi|Dappu1|244787|SNAP_00012845	jgi|Dappu1|247819|SNAP_00015877	>jgi|Dappu1|267980|SNAP_00036038	>jgi|Dappu1|336587|NCBI_GNO_107000001
>jgi|Dappu1|111190|fgenesh1_pg.C_scaffold_82000022	>jgi|Dappu1|304507|PASA_GEN_2900117	jgi|Dappu1|247820|SNAP_00015878	>jgi|Dappu1|268051|SNAP_00036109	>jgi|Dappu1|269933|SNAP_00037991
>jgi|Dappu1|111191|fgenesh1_pg.C_scaffold_82000023	>jgi|Dappu1|304456|PASA_GEN_2900056	jgi|Dappu1|247821|SNAP_00015879	>jgi|Dappu1|268086|SNAP_00036144	>jgi|Dappu1|270216|SNAP_00038274
>jgi|Dappu1|111192|fgenesh1_pg.C_scaffold_82000024	>jgi|Dappu1|104306|fgenesh1_pg.C_scaffold_29000185	jgi|Dappu1|247832|SNAP_00015890	>jgi|Dappu1|268106|SNAP_00036164	>jgi|Dappu1|270229|SNAP_00038287
>jgi|Dappu1|111193|fgenesh1_pg.C_scaffold_82000025	>jgi|Dappu1|244799|SNAP_00012857	jgi|Dappu1|247833|SNAP_00015891	>jgi|Dappu1|268193|SNAP_00036251	>jgi|Dappu1|120141|fgenesh1_pg.C_scaffold_1183000002
>jgi|Dappu1|111195|fgenesh1_pg.C_scaffold_82000027	>jgi|Dappu1|244800|SNAP_00012858	jgi|Dappu1|321541|NCBI_GNO_4100096	>jgi|Dappu1|268209|SNAP_00036267	>jgi|Dappu1|270284|SNAP_00038342
>jgi|Dappu1|111200|fgenesh1_pg.C_scaffold_82000032	>jgi|Dappu1|244801|SNAP_00012859	jgi|Dappu1|247836|SNAP_00015894	>jgi|Dappu1|268211|SNAP_00036269	>jgi|Dappu1|270431|SNAP_00038489
>jgi|Dappu1|111201|fgenesh1_pg.C_scaffold_82000033	>jgi|Dappu1|104313|fgenesh1_pg.C_scaffold_29000192	jgi|Dappu1|247839|SNAP_00015897	>jgi|Dappu1|268220|SNAP_00036278	>jgi|Dappu1|301540|PASA_GEN_138300003
>jgi|Dappu1|111202|fgenesh1_pg.C_scaffold_82000034	>jgi|Dappu1|319483|NCBI_GNO_2900182	jgi|Dappu1|106230|fgenesh1_pg.C_scaffold_41000075	>jgi|Dappu1|268273|SNAP_00036331	>jgi|Dappu1|337179|NCBI_GNO_140100001
>jgi|Dappu1|111204|fgenesh1_pg.C_scaffold_82000036	>jgi|Dappu1|104315|fgenesh1_pg.C_scaffold_29000194	jgi|Dappu1|321547|NCBI_GNO_4100102	>jgi|Dappu1|268275|SNAP_00036333	>jgi|Dappu1|337195|NCBI_GNO_141100001
>jgi|Dappu1|111235|fgenesh1_pg.C_scaffold_83000007	>jgi|Dappu1|104316|fgenesh1_pg.C_scaffold_29000195	jgi|Dappu1|247845|SNAP_00015903	>jgi|Dappu1|268280|SNAP_00036338	>jgi|Dappu1|337196|NCBI_GNO_141100002
>jgi|Dappu1|111270|fgenesh1_pg.C_scaffold_83000042	>jgi|Dappu1|244808|SNAP_00012866	jgi|Dappu1|321549|NCBI_GNO_4100104	>jgi|Dappu1|268313|SNAP_00036371	>jgi|Dappu1|270798|SNAP_00038856
>jgi|Dappu1|111291|fgenesh1_pg.C_scaffold_83000063	>jgi|Dappu1|104318|fgenesh1_pg.C_scaffold_29000197	jgi|Dappu1|106232|fgenesh1_pg.C_scaffold_41000077	>jgi|Dappu1|268315|SNAP_00036373	>jgi|Dappu1|337321|NCBI_GNO_147900003
>jgi|Dappu1|111316|fgenesh1_pg.C_scaffold_83000088	>jgi|Dappu1|225079|estExt_fgenesh1_pg.C_290199	jgi|Dappu1|247849|SNAP_00015907	>jgi|Dappu1|268331|SNAP_00036389	>jgi|Dappu1|270901|SNAP_00038959
>jgi|Dappu1|111332|fgenesh1_pg.C_scaffold_84000002	>jgi|Dappu1|319492|NCBI_GNO_2900191	jgi|Dappu1|321553|NCBI_GNO_4100108	>jgi|Dappu1|268353|SNAP_00036411	>jgi|Dappu1|120485|fgenesh1_pg.C_scaffold_1504000002
>jgi|Dappu1|111351|fgenesh1_pg.C_scaffold_84000021	>jgi|Dappu1|231024|estExt_fgenesh1_kg.C_290015	jgi|Dappu1|247854|SNAP_00015912	>jgi|Dappu1|268380|SNAP_00036438	>jgi|Dappu1|270944|SNAP_00039002
>jgi|Dappu1|111353|fgenesh1_pg.C_scaffold_84000023	>jgi|Dappu1|244819|SNAP_00012877	jgi|Dappu1|247855|SNAP_00015913	>jgi|Dappu1|268502|SNAP_00036560	>jgi|Dappu1|337598|NCBI_GNO_163700002
>jgi|Dappu1|111356|fgenesh1_pg.C_scaffold_84000026	>jgi|Dappu1|244820|SNAP_00012878	jgi|Dappu1|247856|SNAP_00015914	>jgi|Dappu1|268517|SNAP_00036575	>jgi|Dappu1|204885|estExt_Genewise1Plus.C_17160001
>jgi|Dappu1|111381|fgenesh1_pg.C_scaffold_85000004	>jgi|Dappu1|244821|SNAP_00012879	jgi|Dappu1|106236|fgenesh1_pg.C_scaffold_41000081	>jgi|Dappu1|268624|SNAP_00036682	>jgi|Dappu1|120723|fgenesh1_pg.C_scaffold_1754000001
>jgi|Dappu1|111382|fgenesh1_pg.C_scaffold_85000005	>jgi|Dappu1|319496|NCBI_GNO_2900195	jgi|Dappu1|321559|NCBI_GNO_4100114	>jgi|Dappu1|268670|SNAP_00036728	>jgi|Dappu1|271573|SNAP_00039631
>jgi|Dappu1|111396|fgenesh1_pg.C_scaffold_85000019	>jgi|Dappu1|319497|NCBI_GNO_2900196	jgi|Dappu1|54309|e_gw1.41.135.1	>jgi|Dappu1|268743|SNAP_00036801	>jgi|Dappu1|120825|fgenesh1_pg.C_scaffold_1876000001
>jgi|Dappu1|111403|fgenesh1_pg.C_scaffold_85000026	>jgi|Dappu1|104329|fgenesh1_pg.C_scaffold_29000208	jgi|Dappu1|247867|SNAP_00015925	>jgi|Dappu1|268862|SNAP_00036920	>jgi|Dappu1|337911|NCBI_GNO_188400001
>jgi|Dappu1|111404|fgenesh1_pg.C_scaffold_85000027	>jgi|Dappu1|319499|NCBI_GNO_2900198	jgi|Dappu1|321563|NCBI_GNO_4100118	>jgi|Dappu1|268870|SNAP_00036928	>jgi|Dappu1|120887|fgenesh1_pg.C_scaffold_1961000002
>jgi|Dappu1|111411|fgenesh1_pg.C_scaffold_85000034	>jgi|Dappu1|244827|SNAP_00012885	jgi|Dappu1|321564|NCBI_GNO_4100119	>jgi|Dappu1|268907|SNAP_00036965	>jgi|Dappu1|271710|SNAP_00039768
>jgi|Dappu1|111412|fgenesh1_pg.C_scaffold_85000035	>jgi|Dappu1|319502|NCBI_GNO_2900201	jgi|Dappu1|106242|fgenesh1_pg.C_scaffold_41000087	>jgi|Dappu1|268909|SNAP_00036967	>jgi|Dappu1|338046|NCBI_GNO_199900001
>jgi|Dappu1|111421|fgenesh1_pg.C_scaffold_85000044	>jgi|Dappu1|319503|NCBI_GNO_2900202	jgi|Dappu1|321566|NCBI_GNO_4100121	>jgi|Dappu1|269013|SNAP_00037071	>jgi|Dappu1|338861|NCBI_GNO_269400001
>jgi|Dappu1|111434|fgenesh1_pg.C_scaffold_85000057	>jgi|Dappu1|319504|NCBI_GNO_2900203	jgi|Dappu1|321568|NCBI_GNO_4100123	>jgi|Dappu1|269038|SNAP_00037096	>jgi|Dappu1|338964|NCBI_GNO_279900002
>jgi|Dappu1|111440|fgenesh1_pg.C_scaffold_85000063	>jgi|Dappu1|104345|fgenesh1_pg.C_scaffold_29000224	jgi|Dappu1|247874|SNAP_00015932	>jgi|Dappu1|269043|SNAP_00037101	>jgi|Dappu1|338993|NCBI_GNO_282300002
>jgi|Dappu1|111443|fgenesh1_pg.C_scaffold_85000066	>jgi|Dappu1|244837|SNAP_00012895	jgi|Dappu1|106245|fgenesh1_pg.C_scaffold_41000090	>jgi|Dappu1|269044|SNAP_00037102	>jgi|Dappu1|339077|NCBI_GNO_291700001
>jgi|Dappu1|111446|fgenesh1_pg.C_scaffold_85000069	>jgi|Dappu1|225089|estExt_fgenesh1_pg.C_290222	jgi|Dappu1|321571|NCBI_GNO_4100126	>jgi|Dappu1|269070|SNAP_00037128	>jgi|Dappu1|272928|SNAP_00040986
>jgi|Dappu1|111447|fgenesh1_pg.C_scaffold_85000070	>jgi|Dappu1|319515|NCBI_GNO_2900214	jgi|Dappu1|321572|NCBI_GNO_4100127	>jgi|Dappu1|269106|SNAP_00037164	>jgi|Dappu1|339127|NCBI_GNO_297200003
>jgi|Dappu1|111450|fgenesh1_pg.C_scaffold_85000073	>jgi|Dappu1|244841|SNAP_00012899	jgi|Dappu1|321573|NCBI_GNO_4100128	>jgi|Dappu1|269232|SNAP_00037290	>jgi|Dappu1|339194|NCBI_GNO_304100001
>jgi|Dappu1|111452|fgenesh1_pg.C_scaffold_85000075	>jgi|Dappu1|319518|NCBI_GNO_2900217	jgi|Dappu1|321575|NCBI_GNO_4100130	>jgi|Dappu1|269364|SNAP_00037422	>jgi|Dappu1|121761|fgenesh1_pg.C_scaffold_3201000001
>jgi|Dappu1|111453|fgenesh1_pg.C_scaffold_85000076	>jgi|Dappu1|104354|fgenesh1_pg.C_scaffold_29000233	jgi|Dappu1|247884|SNAP_00015942	>jgi|Dappu1|269381|SNAP_00037439	>jgi|Dappu1|339419|NCBI_GNO_324600002
>jgi|Dappu1|111461|fgenesh1_pg.C_scaffold_86000008	>jgi|Dappu1|94544|fgenesh1_pg.C_scaffold_2000001	jgi|Dappu1|106250|fgenesh1_pg.C_scaffold_41000095	>jgi|Dappu1|269425|SNAP_00037483	>jgi|Dappu1|339437|NCBI_GNO_326200001
>jgi|Dappu1|111464|fgenesh1_pg.C_scaffold_86000011	>jgi|Dappu1|94545|fgenesh1_pg.C_scaffold_2000002	jgi|Dappu1|106251|fgenesh1_pg.C_scaffold_41000096	>jgi|Dappu1|269431|SNAP_00037489	>jgi|Dappu1|339495|NCBI_GNO_332400001
>jgi|Dappu1|111468|fgenesh1_pg.C_scaffold_86000015	>jgi|Dappu1|310071|NCBI_GNO_0200003	jgi|Dappu1|247892|SNAP_00015950	>jgi|Dappu1|269506|SNAP_00037564	>jgi|Dappu1|339518|NCBI_GNO_334400002
>jgi|Dappu1|111484|fgenesh1_pg.C_scaffold_86000031	>jgi|Dappu1|232780|SNAP_00000838	jgi|Dappu1|247893|SNAP_00015951	>jgi|Dappu1|269552|SNAP_00037610	>jgi|Dappu1|339680|NCBI_GNO_349600001
>jgi|Dappu1|111492|fgenesh1_pg.C_scaffold_86000039	>jgi|Dappu1|310076|NCBI_GNO_0200008	jgi|Dappu1|305851|PASA_GEN_4100032	>jgi|Dappu1|269705|SNAP_00037763	>jgi|Dappu1|339705|NCBI_GNO_351700002
>jgi|Dappu1|111493|fgenesh1_pg.C_scaffold_86000040	>jgi|Dappu1|190410|estExt_Genewise1Plus.C_20012	jgi|Dappu1|321588|NCBI_GNO_4100143	>jgi|Dappu1|269751|SNAP_00037809	>jgi|Dappu1|339725|NCBI_GNO_353200001
>jgi|Dappu1|111498|fgenesh1_pg.C_scaffold_86000045	>jgi|Dappu1|220308|estExt_fgenesh1_pg.C_20013	jgi|Dappu1|106264|fgenesh1_pg.C_scaffold_41000109	>jgi|Dappu1|269853|SNAP_00037911	>jgi|Dappu1|339890|NCBI_GNO_370000001
>jgi|Dappu1|111503|fgenesh1_pg.C_scaffold_86000050	>jgi|Dappu1|94560|fgenesh1_pg.C_scaffold_2000017	jgi|Dappu1|106265|fgenesh1_pg.C_scaffold_41000110	>jgi|Dappu1|269906|SNAP_00037964	>jgi|Dappu1|340007|NCBI_GNO_381300001
>jgi|Dappu1|111512|fgenesh1_pg.C_scaffold_86000059	>jgi|Dappu1|303092|PASA_GEN_0200171	jgi|Dappu1|247907|SNAP_00015965	>jgi|Dappu1|269994|SNAP_00038052	>jgi|Dappu1|340008|NCBI_GNO_381300002
>jgi|Dappu1|111513|fgenesh1_pg.C_scaffold_86000060	>jgi|Dappu1|232798|SNAP_00000856	jgi|Dappu1|321592|NCBI_GNO_4100147	>jgi|Dappu1|270005|SNAP_00038063	>jgi|Dappu1|340092|NCBI_GNO_391400001
>jgi|Dappu1|111514|fgenesh1_pg.C_scaffold_86000061	>jgi|Dappu1|303093|PASA_GEN_0200172	jgi|Dappu1|321593|NCBI_GNO_4100148	>jgi|Dappu1|270063|SNAP_00038121	>jgi|Dappu1|340108|NCBI_GNO_392800001
>jgi|Dappu1|111544|fgenesh1_pg.C_scaffold_86000091	>jgi|Dappu1|220312|estExt_fgenesh1_pg.C_20023	jgi|Dappu1|247911|SNAP_00015969	>jgi|Dappu1|270129|SNAP_00038187	>jgi|Dappu1|274063|SNAP_00042121
>jgi|Dappu1|111549|fgenesh1_pg.C_scaffold_86000096	>jgi|Dappu1|310087|NCBI_GNO_0200019	jgi|Dappu1|106268|fgenesh1_pg.C_scaffold_41000113	>jgi|Dappu1|270154|SNAP_00038212	>jgi|Dappu1|122256|fgenesh1_pg.C_scaffold_3947000001
>jgi|Dappu1|111566|fgenesh1_pg.C_scaffold_86000113	>jgi|Dappu1|303094|PASA_GEN_0200173	jgi|Dappu1|247916|SNAP_00015974	>jgi|Dappu1|270188|SNAP_00038246	>jgi|Dappu1|274074|SNAP_00042132
>jgi|Dappu1|111579|fgenesh1_pg.C_scaffold_87000011	>jgi|Dappu1|94570|fgenesh1_pg.C_scaffold_2000027	jgi|Dappu1|247919|SNAP_00015977	>jgi|Dappu1|27026|gw1.18.233.1	>jgi|Dappu1|340134|NCBI_GNO_395400001
>jgi|Dappu1|111582|fgenesh1_pg.C_scaffold_87000014	>jgi|Dappu1|232803|SNAP_00000861	jgi|Dappu1|247921|SNAP_00015979	>jgi|Dappu1|270289|SNAP_00038347	>jgi|Dappu1|340135|NCBI_GNO_395400002
>jgi|Dappu1|111590|fgenesh1_pg.C_scaffold_87000022	>jgi|Dappu1|303095|PASA_GEN_0200174	jgi|Dappu1|247922|SNAP_00015980	>jgi|Dappu1|270337|SNAP_00038395	>jgi|Dappu1|340145|NCBI_GNO_396200001
>jgi|Dappu1|111599|fgenesh1_pg.C_scaffold_87000031	>jgi|Dappu1|310096|NCBI_GNO_0200028	jgi|Dappu1|106272|fgenesh1_pg.C_scaffold_41000117	>jgi|Dappu1|270358|SNAP_00038416	>jgi|Dappu1|274118|SNAP_00042176
>jgi|Dappu1|111600|fgenesh1_pg.C_scaffold_87000032	>jgi|Dappu1|310097|NCBI_GNO_0200029	jgi|Dappu1|247931|SNAP_00015989	>jgi|Dappu1|270405|SNAP_00038463	>jgi|Dappu1|340206|NCBI_GNO_403500002
>jgi|Dappu1|111605|fgenesh1_pg.C_scaffold_87000037	>jgi|Dappu1|310098|NCBI_GNO_0200030	jgi|Dappu1|247933|SNAP_00015991	>jgi|Dappu1|270442|SNAP_00038500	>jgi|Dappu1|274251|SNAP_00042309
>jgi|Dappu1|111606|fgenesh1_pg.C_scaffold_87000038	>jgi|Dappu1|232810|SNAP_00000868	jgi|Dappu1|247938|SNAP_00015996	>jgi|Dappu1|270465|SNAP_00038523	>jgi|Dappu1|274317|SNAP_00042375
>jgi|Dappu1|111607|fgenesh1_pg.C_scaffold_87000039	>jgi|Dappu1|232811|SNAP_00000869	jgi|Dappu1|247939|SNAP_00015997	>jgi|Dappu1|270466|SNAP_00038524	>jgi|Dappu1|274329|SNAP_00042387
>jgi|Dappu1|111631|fgenesh1_pg.C_scaffold_87000063	>jgi|Dappu1|232812|SNAP_00000870	jgi|Dappu1|305854|PASA_GEN_4100035	>jgi|Dappu1|270522|SNAP_00038580	>jgi|Dappu1|274377|SNAP_00042435
>jgi|Dappu1|111636|fgenesh1_pg.C_scaffold_87000068	>jgi|Dappu1|302953|PASA_GEN_0200012	jgi|Dappu1|106275|fgenesh1_pg.C_scaffold_41000120	>jgi|Dappu1|270568|SNAP_00038626	>jgi|Dappu1|340460|NCBI_GNO_428900003
>jgi|Dappu1|111637|fgenesh1_pg.C_scaffold_87000069	>jgi|Dappu1|232814|SNAP_00000872	jgi|Dappu1|106277|fgenesh1_pg.C_scaffold_41000122	>jgi|Dappu1|270607|SNAP_00038665	>jgi|Dappu1|340635|NCBI_GNO_453400003
>jgi|Dappu1|111641|fgenesh1_pg.C_scaffold_87000073	>jgi|Dappu1|232816|SNAP_00000874	jgi|Dappu1|106278|fgenesh1_pg.C_scaffold_41000123	>jgi|Dappu1|270681|SNAP_00038739	>jgi|Dappu1|274697|SNAP_00042755
>jgi|Dappu1|111642|fgenesh1_pg.C_scaffold_87000074	>jgi|Dappu1|310101|NCBI_GNO_0200033	jgi|Dappu1|247944|SNAP_00016002	>jgi|Dappu1|270684|SNAP_00038742	>jgi|Dappu1|122611|fgenesh1_pg.C_scaffold_4712000001
>jgi|Dappu1|111681|fgenesh1_pg.C_scaffold_87000113	>jgi|Dappu1|310102|NCBI_GNO_0200034	jgi|Dappu1|321611|NCBI_GNO_4100166	>jgi|Dappu1|270809|SNAP_00038867	>jgi|Dappu1|274847|SNAP_00042905
>jgi|Dappu1|111682|fgenesh1_pg.C_scaffold_87000114	>jgi|Dappu1|232819|SNAP_00000877	jgi|Dappu1|321612|NCBI_GNO_4100167	>jgi|Dappu1|270818|SNAP_00038876	>jgi|Dappu1|340975|NCBI_GNO_509400001
>jgi|Dappu1|111697|fgenesh1_pg.C_scaffold_87000129	>jgi|Dappu1|310104|NCBI_GNO_0200036	jgi|Dappu1|106280|fgenesh1_pg.C_scaffold_41000125	>jgi|Dappu1|270827|SNAP_00038885	>jgi|Dappu1|275195|SNAP_00043253
>jgi|Dappu1|111700|fgenesh1_pg.C_scaffold_87000132	>jgi|Dappu1|220319|estExt_fgenesh1_pg.C_20038	jgi|Dappu1|247952|SNAP_00016010	>jgi|Dappu1|270837|SNAP_00038895	>jgi|Dappu1|341271|NCBI_GNO_575400001
>jgi|Dappu1|111702|fgenesh1_pg.C_scaffold_87000134	>jgi|Dappu1|232824|SNAP_00000882	jgi|Dappu1|225734|estExt_fgenesh1_pg.C_410127	>jgi|Dappu1|270884|SNAP_00038942	>jgi|Dappu1|341506|NCBI_GNO_598600001
>jgi|Dappu1|111713|fgenesh1_pg.C_scaffold_87000145	>jgi|Dappu1|232827|SNAP_00000885	jgi|Dappu1|321618|NCBI_GNO_4100173	>jgi|Dappu1|270907|SNAP_00038965	>jgi|Dappu1|123181|fgenesh1_pg.C_scaffold_6304000001
>jgi|Dappu1|111716|fgenesh1_pg.C_scaffold_87000148	>jgi|Dappu1|232828|SNAP_00000886	jgi|Dappu1|106287|fgenesh1_pg.C_scaffold_41000132	>jgi|Dappu1|270920|SNAP_00038978	>jgi|Dappu1|275969|SNAP_00044027
>jgi|Dappu1|111719|fgenesh1_pg.C_scaffold_87000151	>jgi|Dappu1|232829|SNAP_00000887	jgi|Dappu1|321621|NCBI_GNO_4100176	>jgi|Dappu1|271035|SNAP_00039093	>jgi|Dappu1|275971|SNAP_00044029
>jgi|Dappu1|111730|fgenesh1_pg.C_scaffold_88000002	>jgi|Dappu1|310110|NCBI_GNO_0200042	jgi|Dappu1|321622|NCBI_GNO_4100177	>jgi|Dappu1|271186|SNAP_00039244	>jgi|Dappu1|123262|fgenesh1_pg.C_scaffold_6455000001
>jgi|Dappu1|111731|fgenesh1_pg.C_scaffold_88000003	>jgi|Dappu1|310111|NCBI_GNO_0200043	jgi|Dappu1|333035|NCBI_GNO_21800002	>jgi|Dappu1|271327|SNAP_00039385	>jgi|Dappu1|276276|SNAP_00044334
>jgi|Dappu1|111732|fgenesh1_pg.C_scaffold_88000004	>jgi|Dappu1|94591|fgenesh1_pg.C_scaffold_2000048	jgi|Dappu1|333036|NCBI_GNO_21800003	>jgi|Dappu1|271388|SNAP_00039446	>jgi|Dappu1|342160|NCBI_GNO_688200001
>jgi|Dappu1|111737|fgenesh1_pg.C_scaffold_88000009	>jgi|Dappu1|303102|PASA_GEN_0200186	jgi|Dappu1|333038|NCBI_GNO_21800005	>jgi|Dappu1|271443|SNAP_00039501	>jgi|Dappu1|342166|NCBI_GNO_688900001
>jgi|Dappu1|111742|fgenesh1_pg.C_scaffold_88000014	>jgi|Dappu1|220332|estExt_fgenesh1_pg.C_20057	jgi|Dappu1|333039|NCBI_GNO_21800006	>jgi|Dappu1|271505|SNAP_00039563	>jgi|Dappu1|342193|NCBI_GNO_692200001
>jgi|Dappu1|111744|fgenesh1_pg.C_scaffold_88000016	>jgi|Dappu1|94605|fgenesh1_pg.C_scaffold_2000062	jgi|Dappu1|117134|fgenesh1_pg.C_scaffold_218000004	>jgi|Dappu1|27153|gw1.45.86.1	>jgi|Dappu1|342204|NCBI_GNO_694100001
>jgi|Dappu1|111753|fgenesh1_pg.C_scaffold_88000025	>jgi|Dappu1|232846|SNAP_00000904	jgi|Dappu1|117135|fgenesh1_pg.C_scaffold_218000005	>jgi|Dappu1|271558|SNAP_00039616	>jgi|Dappu1|342230|NCBI_GNO_698500001
>jgi|Dappu1|111754|fgenesh1_pg.C_scaffold_88000026	>jgi|Dappu1|232847|SNAP_00000905	jgi|Dappu1|264471|SNAP_00032529	>jgi|Dappu1|271603|SNAP_00039661	>jgi|Dappu1|276405|SNAP_00044463
>jgi|Dappu1|111757|fgenesh1_pg.C_scaffold_88000029	>jgi|Dappu1|310125|NCBI_GNO_0200057	jgi|Dappu1|117136|fgenesh1_pg.C_scaffold_218000006	>jgi|Dappu1|271662|SNAP_00039720	>jgi|Dappu1|276406|SNAP_00044464
>jgi|Dappu1|111787|fgenesh1_pg.C_scaffold_88000059	>jgi|Dappu1|232849|SNAP_00000907	jgi|Dappu1|264475|SNAP_00032533	>jgi|Dappu1|271721|SNAP_00039779	>jgi|Dappu1|123496|fgenesh1_pg.C_scaffold_7083000001
>jgi|Dappu1|111795|fgenesh1_pg.C_scaffold_88000067	>jgi|Dappu1|232850|SNAP_00000908	jgi|Dappu1|229597|estExt_fgenesh1_pg.C_2180009	>jgi|Dappu1|271748|SNAP_00039806	>jgi|Dappu1|307976|PASA_GEN_713800001
>jgi|Dappu1|111797|fgenesh1_pg.C_scaffold_88000069	>jgi|Dappu1|310126|NCBI_GNO_0200058	jgi|Dappu1|333044|NCBI_GNO_21800011	>jgi|Dappu1|271814|SNAP_00039872	>jgi|Dappu1|342356|NCBI_GNO_719200001
>jgi|Dappu1|111820|fgenesh1_pg.C_scaffold_88000092	>jgi|Dappu1|94613|fgenesh1_pg.C_scaffold_2000070	jgi|Dappu1|264481|SNAP_00032539	>jgi|Dappu1|271886|SNAP_00039944	>jgi|Dappu1|342394|NCBI_GNO_723700003
>jgi|Dappu1|111826|fgenesh1_pg.C_scaffold_88000098	>jgi|Dappu1|220340|estExt_fgenesh1_pg.C_20070	jgi|Dappu1|333048|NCBI_GNO_21800015	>jgi|Dappu1|271917|SNAP_00039975	>jgi|Dappu1|342431|NCBI_GNO_729300001
>jgi|Dappu1|111837|fgenesh1_pg.C_scaffold_88000109	>jgi|Dappu1|232855|SNAP_00000913	jgi|Dappu1|251331|SNAP_00019389	>jgi|Dappu1|272030|SNAP_00040088	>jgi|Dappu1|123584|fgenesh1_pg.C_scaffold_7325000001
>jgi|Dappu1|111848|fgenesh1_pg.C_scaffold_89000011	>jgi|Dappu1|232856|SNAP_00000914	jgi|Dappu1|306971|PASA_GEN_5800027	>jgi|Dappu1|272033|SNAP_00040091	>jgi|Dappu1|342484|NCBI_GNO_740300001
>jgi|Dappu1|111869|fgenesh1_pg.C_scaffold_89000032	>jgi|Dappu1|232857|SNAP_00000915	jgi|Dappu1|323919|NCBI_GNO_5800008	>jgi|Dappu1|272135|SNAP_00040193	>jgi|Dappu1|123683|fgenesh1_pg.C_scaffold_7600000001
>jgi|Dappu1|111874|fgenesh1_pg.C_scaffold_89000037	>jgi|Dappu1|232858|SNAP_00000916	jgi|Dappu1|108438|fgenesh1_pg.C_scaffold_58000009	>jgi|Dappu1|272192|SNAP_00040250	>jgi|Dappu1|276763|SNAP_00044821
>jgi|Dappu1|111884|fgenesh1_pg.C_scaffold_89000047	>jgi|Dappu1|303268|PASA_GEN_0200415	jgi|Dappu1|251345|SNAP_00019403	>jgi|Dappu1|272232|SNAP_00040290	>jgi|Dappu1|342877|NCBI_GNO_822700001
>jgi|Dappu1|111894|fgenesh1_pg.C_scaffold_89000057	>jgi|Dappu1|310134|NCBI_GNO_0200066	jgi|Dappu1|323923|NCBI_GNO_5800012	>jgi|Dappu1|272261|SNAP_00040319	>jgi|Dappu1|342883|NCBI_GNO_824100001
>jgi|Dappu1|111901|fgenesh1_pg.C_scaffold_89000064	>jgi|Dappu1|32451|gw1.2.794.1	jgi|Dappu1|251346|SNAP_00019404	>jgi|Dappu1|272423|SNAP_00040481	>jgi|Dappu1|342942|NCBI_GNO_838600001
>jgi|Dappu1|111902|fgenesh1_pg.C_scaffold_89000065	>jgi|Dappu1|302974|PASA_GEN_0200037	jgi|Dappu1|323925|NCBI_GNO_5800014	>jgi|Dappu1|272587|SNAP_00040645	>jgi|Dappu1|342987|NCBI_GNO_848600001
>jgi|Dappu1|111912|fgenesh1_pg.C_scaffold_89000075	>jgi|Dappu1|310142|NCBI_GNO_0200074	jgi|Dappu1|108443|fgenesh1_pg.C_scaffold_58000014	>jgi|Dappu1|272795|SNAP_00040853	>jgi|Dappu1|342996|NCBI_GNO_850800001
>jgi|Dappu1|111930|fgenesh1_pg.C_scaffold_90000018	>jgi|Dappu1|232879|SNAP_00000937	jgi|Dappu1|323929|NCBI_GNO_5800018	>jgi|Dappu1|273082|SNAP_00041140	>jgi|Dappu1|342997|NCBI_GNO_850800002
>jgi|Dappu1|111959|fgenesh1_pg.C_scaffold_90000047	>jgi|Dappu1|232880|SNAP_00000938	jgi|Dappu1|251359|SNAP_00019417	>jgi|Dappu1|273209|SNAP_00041267	>jgi|Dappu1|277091|SNAP_00045149
>jgi|Dappu1|111981|fgenesh1_pg.C_scaffold_90000069	>jgi|Dappu1|232881|SNAP_00000939	jgi|Dappu1|108452|fgenesh1_pg.C_scaffold_58000023	>jgi|Dappu1|273290|SNAP_00041348	>jgi|Dappu1|343085|NCBI_GNO_869200001
>jgi|Dappu1|112027|fgenesh1_pg.C_scaffold_91000007	>jgi|Dappu1|232882|SNAP_00000940	jgi|Dappu1|108453|fgenesh1_pg.C_scaffold_58000024	>jgi|Dappu1|273379|SNAP_00041437	>jgi|Dappu1|123965|fgenesh1_pg.C_scaffold_8693000001
>jgi|Dappu1|112030|fgenesh1_pg.C_scaffold_91000010	>jgi|Dappu1|232884|SNAP_00000942	jgi|Dappu1|323936|NCBI_GNO_5800025	>jgi|Dappu1|273432|SNAP_00041490	>jgi|Dappu1|343115|NCBI_GNO_874900001
>jgi|Dappu1|112037|fgenesh1_pg.C_scaffold_91000017	>jgi|Dappu1|94634|fgenesh1_pg.C_scaffold_2000091	jgi|Dappu1|323937|NCBI_GNO_5800026	>jgi|Dappu1|273487|SNAP_00041545	>jgi|Dappu1|343128|NCBI_GNO_878200001
>jgi|Dappu1|112046|fgenesh1_pg.C_scaffold_91000026	>jgi|Dappu1|303113|PASA_GEN_0200199	jgi|Dappu1|251366|SNAP_00019424	>jgi|Dappu1|273584|SNAP_00041642	>jgi|Dappu1|124025|fgenesh1_pg.C_scaffold_8885000001
>jgi|Dappu1|112047|fgenesh1_pg.C_scaffold_91000027	>jgi|Dappu1|310151|NCBI_GNO_0200083	jgi|Dappu1|251367|SNAP_00019425	>jgi|Dappu1|273585|SNAP_00041643	>jgi|Dappu1|277864|SNAP_00045922
>jgi|Dappu1|112049|fgenesh1_pg.C_scaffold_91000029	>jgi|Dappu1|310152|NCBI_GNO_0200084	jgi|Dappu1|323940|NCBI_GNO_5800029	>jgi|Dappu1|27377|gw1.22.89.1	>jgi|Dappu1|343199|NCBI_GNO_1001700002
>jgi|Dappu1|112050|fgenesh1_pg.C_scaffold_91000030	>jgi|Dappu1|232894|SNAP_00000952	jgi|Dappu1|251371|SNAP_00019429	>jgi|Dappu1|273773|SNAP_00041831	>jgi|Dappu1|124434|fgenesh1_pg.C_scaffold_10033000001
>jgi|Dappu1|112052|fgenesh1_pg.C_scaffold_91000032	>jgi|Dappu1|232895|SNAP_00000953	jgi|Dappu1|108459|fgenesh1_pg.C_scaffold_58000030	>jgi|Dappu1|27395|gw1.14.271.1	>jgi|Dappu1|277919|SNAP_00045977
>jgi|Dappu1|112057|fgenesh1_pg.C_scaffold_91000037	>jgi|Dappu1|232903|SNAP_00000961	jgi|Dappu1|251375|SNAP_00019433	>jgi|Dappu1|273988|SNAP_00042046	>jgi|Dappu1|343268|NCBI_GNO_1013100001
>jgi|Dappu1|112065|fgenesh1_pg.C_scaffold_91000045	>jgi|Dappu1|94655|fgenesh1_pg.C_scaffold_2000112	jgi|Dappu1|323946|NCBI_GNO_5800035	>jgi|Dappu1|273989|SNAP_00042047	>jgi|Dappu1|343332|NCBI_GNO_1023700001
>jgi|Dappu1|112066|fgenesh1_pg.C_scaffold_91000046	>jgi|Dappu1|94656|fgenesh1_pg.C_scaffold_2000113	jgi|Dappu1|306976|PASA_GEN_5800032	>jgi|Dappu1|27414|gw1.13.374.1	>jgi|Dappu1|278018|SNAP_00046076
>jgi|Dappu1|112080|fgenesh1_pg.C_scaffold_91000060	>jgi|Dappu1|232907|SNAP_00000965	jgi|Dappu1|323953|NCBI_GNO_5800042	>jgi|Dappu1|27434|gw1.18.245.1	>jgi|Dappu1|343363|NCBI_GNO_1028100003
>jgi|Dappu1|112081|fgenesh1_pg.C_scaffold_91000061	>jgi|Dappu1|232909|SNAP_00000967	jgi|Dappu1|306951|PASA_GEN_5800003	>jgi|Dappu1|274355|SNAP_00042413	>jgi|Dappu1|343402|NCBI_GNO_1033700001
>jgi|Dappu1|112082|fgenesh1_pg.C_scaffold_91000062	>jgi|Dappu1|232914|SNAP_00000972	jgi|Dappu1|323957|NCBI_GNO_5800046	>jgi|Dappu1|274376|SNAP_00042434	>jgi|Dappu1|343405|NCBI_GNO_1034300001
>jgi|Dappu1|112092|fgenesh1_pg.C_scaffold_91000072	>jgi|Dappu1|94668|fgenesh1_pg.C_scaffold_2000125	jgi|Dappu1|306953|PASA_GEN_5800005	>jgi|Dappu1|274416|SNAP_00042474	>jgi|Dappu1|343453|NCBI_GNO_1041700001
>jgi|Dappu1|112093|fgenesh1_pg.C_scaffold_91000073	>jgi|Dappu1|94669|fgenesh1_pg.C_scaffold_2000126	jgi|Dappu1|306954|PASA_GEN_5800006	>jgi|Dappu1|274479|SNAP_00042537	>jgi|Dappu1|278187|SNAP_00046245
>jgi|Dappu1|112094|fgenesh1_pg.C_scaffold_91000074	>jgi|Dappu1|232921|SNAP_00000979	jgi|Dappu1|108476|fgenesh1_pg.C_scaffold_58000047	>jgi|Dappu1|274549|SNAP_00042607	>jgi|Dappu1|277443|SNAP_00045501
>jgi|Dappu1|112099|fgenesh1_pg.C_scaffold_91000079	>jgi|Dappu1|94673|fgenesh1_pg.C_scaffold_2000130	jgi|Dappu1|108478|fgenesh1_pg.C_scaffold_58000049	>jgi|Dappu1|274620|SNAP_00042678	>jgi|Dappu1|124179|fgenesh1_pg.C_scaffold_9303000001
>jgi|Dappu1|112104|fgenesh1_pg.C_scaffold_91000084	>jgi|Dappu1|310169|NCBI_GNO_0200101	jgi|Dappu1|251396|SNAP_00019454	>jgi|Dappu1|274703|SNAP_00042761	>jgi|Dappu1|277575|SNAP_00045633
>jgi|Dappu1|112111|fgenesh1_pg.C_scaffold_91000091	>jgi|Dappu1|232923|SNAP_00000981	jgi|Dappu1|56646|e_gw1.58.35.1	>jgi|Dappu1|274715|SNAP_00042773	>jgi|Dappu1|343875|NCBI_GNO_947700001
>jgi|Dappu1|112125|fgenesh1_pg.C_scaffold_92000006	>jgi|Dappu1|232924|SNAP_00000982	jgi|Dappu1|323972|NCBI_GNO_5800061	>jgi|Dappu1|274746|SNAP_00042804	>jgi|Dappu1|343876|NCBI_GNO_947900001
>jgi|Dappu1|112129|fgenesh1_pg.C_scaffold_92000010	>jgi|Dappu1|303118|PASA_GEN_0200208	jgi|Dappu1|108490|fgenesh1_pg.C_scaffold_58000061	>jgi|Dappu1|274889|SNAP_00042947	>jgi|Dappu1|277614|SNAP_00045672
>jgi|Dappu1|112135|fgenesh1_pg.C_scaffold_92000016	>jgi|Dappu1|310179|NCBI_GNO_0200113	jgi|Dappu1|251401|SNAP_00019459	>jgi|Dappu1|274895|SNAP_00042953	>jgi|Dappu1|124289|fgenesh1_pg.C_scaffold_9586000001
>jgi|Dappu1|112137|fgenesh1_pg.C_scaffold_92000018	>jgi|Dappu1|94685|fgenesh1_pg.C_scaffold_2000142	jgi|Dappu1|323979|NCBI_GNO_5800068	>jgi|Dappu1|274981|SNAP_00043039	>jgi|Dappu1|343966|NCBI_GNO_965800001
>jgi|Dappu1|112139|fgenesh1_pg.C_scaffold_92000020	>jgi|Dappu1|94686|fgenesh1_pg.C_scaffold_2000143	jgi|Dappu1|108507|fgenesh1_pg.C_scaffold_58000078	>jgi|Dappu1|275046|SNAP_00043104	>jgi|Dappu1|344178|NCBI_GNO_1061600001
>jgi|Dappu1|112145|fgenesh1_pg.C_scaffold_92000026	>jgi|Dappu1|310184|NCBI_GNO_0200118	jgi|Dappu1|251412|SNAP_00019470	>jgi|Dappu1|275084|SNAP_00043142	>jgi|Dappu1|344180|NCBI_GNO_1061800001
>jgi|Dappu1|112149|fgenesh1_pg.C_scaffold_92000030	>jgi|Dappu1|232941|SNAP_00000999	jgi|Dappu1|56655|e_gw1.58.30.1	>jgi|Dappu1|275132|SNAP_00043190	>jgi|Dappu1|344245|NCBI_GNO_1072600001
>jgi|Dappu1|112150|fgenesh1_pg.C_scaffold_92000031	>jgi|Dappu1|232943|SNAP_00001001	jgi|Dappu1|323997|NCBI_GNO_5800086	>jgi|Dappu1|275216|SNAP_00043274	>jgi|Dappu1|344270|NCBI_GNO_1076700001
>jgi|Dappu1|112151|fgenesh1_pg.C_scaffold_92000032	>jgi|Dappu1|94690|fgenesh1_pg.C_scaffold_2000147	jgi|Dappu1|323998|NCBI_GNO_5800087	>jgi|Dappu1|275263|SNAP_00043321	>jgi|Dappu1|344271|NCBI_GNO_1076800001
>jgi|Dappu1|112152|fgenesh1_pg.C_scaffold_92000033	>jgi|Dappu1|232949|SNAP_00001007	jgi|Dappu1|251423|SNAP_00019481	>jgi|Dappu1|27551|gw1.51.149.1	>jgi|Dappu1|124753|fgenesh1_pg.C_scaffold_10781000001
>jgi|Dappu1|112153|fgenesh1_pg.C_scaffold_92000034	>jgi|Dappu1|94695|fgenesh1_pg.C_scaffold_2000152	jgi|Dappu1|306989|PASA_GEN_5800046	>jgi|Dappu1|275706|SNAP_00043764	>jgi|Dappu1|344353|NCBI_GNO_1089100001
>jgi|Dappu1|112159|fgenesh1_pg.C_scaffold_92000040	>jgi|Dappu1|94696|fgenesh1_pg.C_scaffold_2000153	jgi|Dappu1|108524|fgenesh1_pg.C_scaffold_58000095	>jgi|Dappu1|275708|SNAP_00043766	>jgi|Dappu1|124873|fgenesh1_pg.C_scaffold_11065000001
>jgi|Dappu1|112160|fgenesh1_pg.C_scaffold_92000041	>jgi|Dappu1|94697|fgenesh1_pg.C_scaffold_2000154	jgi|Dappu1|108525|fgenesh1_pg.C_scaffold_58000096	>jgi|Dappu1|275781|SNAP_00043839	>jgi|Dappu1|124876|fgenesh1_pg.C_scaffold_11069000001
>jgi|Dappu1|112166|fgenesh1_pg.C_scaffold_92000047	>jgi|Dappu1|232954|SNAP_00001012	jgi|Dappu1|251434|SNAP_00019492	>jgi|Dappu1|276047|SNAP_00044105	>jgi|Dappu1|344520|NCBI_GNO_1113500002
>jgi|Dappu1|112167|fgenesh1_pg.C_scaffold_92000048	>jgi|Dappu1|303126|PASA_GEN_0200218	jgi|Dappu1|108529|fgenesh1_pg.C_scaffold_58000100	>jgi|Dappu1|276129|SNAP_00044187	>jgi|Dappu1|344533|NCBI_GNO_1115900001
>jgi|Dappu1|112168|fgenesh1_pg.C_scaffold_92000049	>jgi|Dappu1|232963|SNAP_00001021	jgi|Dappu1|108530|fgenesh1_pg.C_scaffold_58000101	>jgi|Dappu1|276149|SNAP_00044207	>jgi|Dappu1|124926|fgenesh1_pg.C_scaffold_11171000001
>jgi|Dappu1|112170|fgenesh1_pg.C_scaffold_92000051	>jgi|Dappu1|94706|fgenesh1_pg.C_scaffold_2000163	jgi|Dappu1|324013|NCBI_GNO_5800102	>jgi|Dappu1|276202|SNAP_00044260	>jgi|Dappu1|344583|NCBI_GNO_1123800001
>jgi|Dappu1|112172|fgenesh1_pg.C_scaffold_92000053	>jgi|Dappu1|94707|fgenesh1_pg.C_scaffold_2000164	jgi|Dappu1|306993|PASA_GEN_5800050	>jgi|Dappu1|276254|SNAP_00044312	>jgi|Dappu1|278669|SNAP_00046727
>jgi|Dappu1|112181|fgenesh1_pg.C_scaffold_92000062	>jgi|Dappu1|94708|fgenesh1_pg.C_scaffold_2000165	jgi|Dappu1|251460|SNAP_00019518	>jgi|Dappu1|27643|gw1.40.181.1	>jgi|Dappu1|344660|NCBI_GNO_1135900001
>jgi|Dappu1|112182|fgenesh1_pg.C_scaffold_92000063	>jgi|Dappu1|94739|fgenesh1_pg.C_scaffold_2000196	jgi|Dappu1|324022|NCBI_GNO_5800111	>jgi|Dappu1|27652|gw1.40.184.1	>jgi|Dappu1|278767|SNAP_00046825
>jgi|Dappu1|112183|fgenesh1_pg.C_scaffold_92000064	>jgi|Dappu1|94740|fgenesh1_pg.C_scaffold_2000197	jgi|Dappu1|324028|NCBI_GNO_5800117	>jgi|Dappu1|27655|gw1.36.148.1	>jgi|Dappu1|344748|NCBI_GNO_1150600001
>jgi|Dappu1|112184|fgenesh1_pg.C_scaffold_92000065	>jgi|Dappu1|232992|SNAP_00001050	jgi|Dappu1|251466|SNAP_00019524	>jgi|Dappu1|276563|SNAP_00044621	>jgi|Dappu1|278824|SNAP_00046882
>jgi|Dappu1|112186|fgenesh1_pg.C_scaffold_92000067	>jgi|Dappu1|232993|SNAP_00001051	jgi|Dappu1|251467|SNAP_00019525	>jgi|Dappu1|276730|SNAP_00044788	>jgi|Dappu1|344822|NCBI_GNO_1160500001
>jgi|Dappu1|112187|fgenesh1_pg.C_scaffold_93000001	>jgi|Dappu1|232994|SNAP_00001052	jgi|Dappu1|226564|estExt_fgenesh1_pg.C_580121	>jgi|Dappu1|277058|SNAP_00045116	>jgi|Dappu1|344873|NCBI_GNO_1170800001
>jgi|Dappu1|112189|fgenesh1_pg.C_scaffold_93000003	>jgi|Dappu1|310235|NCBI_GNO_0200170	jgi|Dappu1|251474|SNAP_00019532	>jgi|Dappu1|277192|SNAP_00045250	>jgi|Dappu1|344914|NCBI_GNO_1176100001
>jgi|Dappu1|112194|fgenesh1_pg.C_scaffold_93000008	>jgi|Dappu1|233001|SNAP_00001059	jgi|Dappu1|251475|SNAP_00019533	>jgi|Dappu1|277799|SNAP_00045857	>jgi|Dappu1|344918|NCBI_GNO_1176900001
>jgi|Dappu1|112195|fgenesh1_pg.C_scaffold_93000009	>jgi|Dappu1|94746|fgenesh1_pg.C_scaffold_2000203	jgi|Dappu1|104122|fgenesh1_pg.C_scaffold_29000001	>jgi|Dappu1|278091|SNAP_00046149	>jgi|Dappu1|278958|SNAP_00047016
>jgi|Dappu1|112214|fgenesh1_pg.C_scaffold_93000028	>jgi|Dappu1|310241|NCBI_GNO_0200176	jgi|Dappu1|304415|PASA_GEN_2900004	>jgi|Dappu1|27821|gw1.44.70.1	>jgi|Dappu1|344940|NCBI_GNO_1180700001
>jgi|Dappu1|112220|fgenesh1_pg.C_scaffold_93000034	>jgi|Dappu1|233010|SNAP_00001068	jgi|Dappu1|304464|PASA_GEN_2900064	>jgi|Dappu1|278239|SNAP_00046297	>jgi|Dappu1|345079|NCBI_GNO_1206500001
>jgi|Dappu1|112235|fgenesh1_pg.C_scaffold_93000049	>jgi|Dappu1|233011|SNAP_00001069	jgi|Dappu1|244605|SNAP_00012663	>jgi|Dappu1|278468|SNAP_00046526	>jgi|Dappu1|279127|SNAP_00047185
>jgi|Dappu1|112237|fgenesh1_pg.C_scaffold_93000051	>jgi|Dappu1|233013|SNAP_00001071	jgi|Dappu1|5603|gw1.29.58.1	>jgi|Dappu1|279572|SNAP_00047630	>jgi|Dappu1|345211|NCBI_GNO_1230800002
>jgi|Dappu1|112240|fgenesh1_pg.C_scaffold_93000054	>jgi|Dappu1|233016|SNAP_00001074	jgi|Dappu1|244609|SNAP_00012667	>jgi|Dappu1|280407|SNAP_00048465	>jgi|Dappu1|279248|SNAP_00047306
>jgi|Dappu1|112242|fgenesh1_pg.C_scaffold_93000056	>jgi|Dappu1|233017|SNAP_00001075	jgi|Dappu1|244611|SNAP_00012669	>jgi|Dappu1|280555|SNAP_00048613	>jgi|Dappu1|125472|fgenesh1_pg.C_scaffold_12520000001
>jgi|Dappu1|112245|fgenesh1_pg.C_scaffold_93000059	>jgi|Dappu1|94753|fgenesh1_pg.C_scaffold_2000210	jgi|Dappu1|304419|PASA_GEN_2900011	>jgi|Dappu1|28070|gw1.22.103.1	>jgi|Dappu1|125475|fgenesh1_pg.C_scaffold_12529000001
[truncated: 16,893 more rows]

## Sheet: Sequences
>jgi|Dappu1|231944|SNAP_00000002|---NA---
[truncated: 36,927 more rows]

## Sheet: HoxL Genes
HoxL Class gene nucleotide sequences (Text wrapped in cells, double click to reveal full seq)
[truncated: 37 more rows]

[truncated: 3 more sheets: Fox Genes, T-Box Genes, miRNA Processing Genes]
